# Supplementary material for: Interventions to improve quantitative measures of parent satisfaction in neonatal care: a systematic review
Source: PubMed Central journal article supplement (PMC7073789; doi:10.1136/bmjpo-2019-000613), 2020-03-15
Supplement: bmjpo-2019-000613.draft_revisions.pdf [file bmjpo-2019-000613.draft_revisions.pdf]

# BMJ Paediatrics Open

BMJ Paediatrics Open is committed to open peer review. As part of this commitment we make the peer review history of every article we publish publicly available.

When an article is published we post the peer reviewers' comments and the authors' responses online. We also post the versions of the paper that were used during peer review. These are the versions that the peer review comments apply to.

The versions of the paper that follow are the versions that were submitted during the peer review process. They are not the versions of record or the final published versions. They should not be cited or distributed as the published version of this manuscript.

BMJ Paediatrics Open is an open access journal and the full, final, typeset and author-corrected version of record of the manuscript is available on our site with no access controls, subscription charges or pay-per-view fees (<http://bmjpaedsopen.bmj.com>).

If you have any questions on BMJ Paediatrics Open's open peer review process please email [info.bmjpo@bmj.com](mailto:info.bmjpo@bmj.com)

# BMJ Paediatrics Open

## Interventions to improve parent satisfaction in neonatal care: a systematic review

|                               |                                                                                                                                                                                                                                                                                                                                                                                                                     |
|-------------------------------|---------------------------------------------------------------------------------------------------------------------------------------------------------------------------------------------------------------------------------------------------------------------------------------------------------------------------------------------------------------------------------------------------------------------|
| Journal:                      | <i>BMJ Paediatrics Open</i>                                                                                                                                                                                                                                                                                                                                                                                         |
| Manuscript ID                 | bmjpo-2019-000613                                                                                                                                                                                                                                                                                                                                                                                                   |
| Article Type:                 | Original research                                                                                                                                                                                                                                                                                                                                                                                                   |
| Date Submitted by the Author: | 18-Nov-2019                                                                                                                                                                                                                                                                                                                                                                                                         |
| Complete List of Authors:     | Sakonidou, Susanna; Imperial College London, Academic Neonatal Medicine<br>Andrzejewska, Izabela; Imperial College London, Academic Neonatal Medicine<br>Webbe, James; Imperial College London, Academic Neonatal Medicine<br>Modi, Neena; Imperial College London, Academic Neonatal Medicine<br>Bell, Derek; NIHR CLAHRC for Northwest London<br>Gale, Chris; Imperial College London, Academic Neonatal Medicine |
| Keywords:                     | Neonatology, Outcomes research, Patient perspective                                                                                                                                                                                                                                                                                                                                                                 |
|                               |                                                                                                                                                                                                                                                                                                                                                                                                                     |

SCHOLARONE™  
Manuscripts

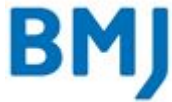

I, the Submitting Author has the right to grant and does grant on behalf of all authors of the Work (as defined in the below author licence), an exclusive licence and/or a non-exclusive licence for contributions from authors who are: i) UK Crown employees; ii) where BMJ has agreed a CC-BY licence shall apply, and/or iii) in accordance with the terms applicable for US Federal Government officers or employees acting as part of their official duties; on a worldwide, perpetual, irrevocable, royalty-free basis to BMJ Publishing Group Ltd ("BMJ") its licensees and where the relevant Journal is co-owned by BMJ to the co-owners of the Journal, to publish the Work in this journal and any other BMJ products and to exploit all rights, as set out in our [licence](#).

The Submitting Author accepts and understands that any supply made under these terms is made by BMJ to the Submitting Author unless you are acting as an employee on behalf of your employer or a postgraduate student of an affiliated institution which is paying any applicable article publishing charge ("APC") for Open Access articles. Where the Submitting Author wishes to make the Work available on an Open Access basis (and intends to pay the relevant APC), the terms of reuse of such Open Access shall be governed by a Creative Commons licence – details of these licences and which [Creative Commons](#) licence will apply to this Work are set out in our licence referred to above.

Other than as permitted in any relevant BMJ Author's Self Archiving Policies, I confirm this Work has not been accepted for publication elsewhere, is not being considered for publication elsewhere and does not duplicate material already published. I confirm all authors consent to publication of this Work and authorise the granting of this licence.

1  
2  
3 **Interventions to improve parent satisfaction in neonatal care: a systematic**  
4 **review**  
5  
6  
7  
8  
9

10 Susanna Sakonidou<sup>1</sup>, Izabela Andrzejewska<sup>2</sup>, James Webbe<sup>3</sup>, Neena Modi<sup>4</sup>, Derek  
11 Bell<sup>5</sup>, Chris Gale<sup>6</sup>  
12  
13  
14  
15  
16

17 1 Susanna Sakonidou, Clinical Research Fellow

18 Highest academic degree: MBBS

19 Section of Neonatal Medicine, Imperial College London.

20 London, United Kingdom.

21 s.sakonidou@imperial.ac.uk  
22  
23  
24  
25  
26  
27  
28  
29  
30

31 2 Izabela Andrzejewska, Neonatal Research Nurse

32 Highest academic degree: RN MSc

33 Section of Neonatal Medicine, Imperial College London.

34 London, United Kingdom.

35 Izabela.ukpl@gmail.com  
36  
37  
38  
39  
40  
41  
42  
43  
44  
45

46 3 James Webbe, Clinical Research Fellow

47 Highest academic degree: MB BChir

48 Section of Neonatal Medicine, Imperial College London.

49 London, United Kingdom.

50 j.webbe@imperial.ac.uk  
51  
52  
53  
54  
55  
56  
57  
58  
59  
60

4 Neena Modi, Professor of Neonatal Medicine

1  
2  
3 Highest academic degree: MD

4  
5 Section of Neonatal Medicine, Imperial College London.

6  
7 London, United Kingdom.

8  
9  
10 n.modi@imperial.ac.uk

11  
12  
13  
14  
15 5 Derek Bell, Professor of Acute Medicine and NIHR CLAHRC Programme Director

16  
17 Highest academic degree: MD

18  
19 National Institute for Health Research Collaboration for Leadership in Applied

20  
21 Health Research and Care, Northwest London, United Kingdom.

22  
23  
24 d.bell@imperial.ac.uk

25  
26  
27  
28 6 Chris Gale, Clinical Senior Lecturer

29  
30 Highest academic degree: PhD

31  
32 Section of Neonatal Medicine, Imperial College London.

33  
34 London, United Kingdom.

35  
36  
37 christopher.gale@imperial.ac.uk

38  
39  
40  
41  
42 Corresponding Author

43  
44 Susanna Sakonidou, Clinical Research Fellow

45  
46 Section of Neonatal Medicine, Chelsea and Westminster campus, Imperial College

47  
48 London

49  
50  
51 369 Fulham Road, London, SW10 9NH, United Kingdom.

52  
53  
54 + 44 (0) 203 315 5418, s.sakonidou@imperial.ac.uk

55  
56  
57  
58 Manuscript word count: 2500

59  
60 Interventions to improve parent satisfaction in neonatal care: a systematic review v1.1 180719

2

## ABSTRACT

### Objective

Interventions improving parent satisfaction can reduce parent stress, may improve parent-infant bonding and infant outcomes. Our objective was to systematically review neonatal interventions relating to parents of infants of all gestations where an outcome was parent satisfaction.

### Methods

We searched the databases MEDLINE, EMBASE, PsychINFO, Cochrane Central, CINAHL, HMIC, Maternity and Infant Care between 1/1/1946-1/10/2017. Inclusion criteria are randomised controlled trials (RCT), cohort studies and other non-randomised studies if participants were parents of infants receiving neonatal care, interventions were implemented in neonatal units (of any care level) and  $\geq 1$  quantitative outcome of parent satisfaction was measured. We extracted study characteristics, interventions, outcomes and parent involvement in intervention design. Included studies were not sufficiently homogenous to enable quantitative synthesis. We assessed quality with the Cochrane Collaboration risk of bias tool (randomised) and the ROBINS-I tool (non-randomised studies).

### Results

We identified 32 studies with satisfaction measures from over 2800 parents and grouped interventions into 5 themes. Most studies were non-randomised involving preterm infants. Parent satisfaction was measured by 334 different questions in 29 questionnaires (only 6/29 fully validated). 18/32 studies reported higher parent

1  
2  
3 satisfaction in the intervention group. The theme with most studies reporting higher  
4  
5 satisfaction was parent involvement (10/14). Five (5/32) studies reported involving  
6  
7 parents in intervention design. All studies had high risk of bias.  
8  
9

## 10 11 12 **Conclusions**

13  
14 Many interventions, commonly relating to parent involvement, are reported to  
15  
16 improve parent satisfaction. Inconsistency in satisfaction measurements and high risk  
17  
18 of bias makes this low-quality evidence. Standardised, validated parent satisfaction  
19  
20 measures are needed, as well as higher quality trials of parent experience involving  
21  
22 parents in intervention design.  
23  
24  
25  
26  
27

28  
29 **PROSPERO registration:** CRD42017072388  
30  
31

32  
33 **Keywords:** neonatology, parents, satisfaction  
34  
35  
36  
37

## 38 **INTRODUCTION**

39  
40 One in 10 newborn babies in high-income countries require neonatal care (1). This is  
41  
42 stressful for parents, who often develop anxiety, depression and Post Traumatic  
43  
44 Stress Disorder symptoms (2-4). Parental stress interferes with parent-child bonding  
45  
46 (5) and there is a well-established link between maternal mental health and infant  
47  
48 development (6). Parent satisfaction, defined as “*the perception of parents’ needs*  
49  
50 *and expectations being met*” is inversely related to parental stress (7). As such, it is  
51  
52 increasingly being used as a parent experience measure and neonatal service quality  
53  
54 indicator. Interventions aimed at improving parent satisfaction have the potential to  
55  
56 reduce parent stress, improve parent-infant bonding (8) and infant outcomes (9).  
57  
58  
59  
60

1  
2  
3  
4  
5 A range of parent-centred interventions, such as including parents on ward rounds,  
6  
7 have recently become widespread in neonatal practice. Many are implemented on a  
8  
9 small scale, without evaluating their impact on parent experience, making long-term  
10  
11 integration into neonatal services challenging. Moreover, where parent experience is  
12  
13 measured, some studies include it as a primary outcome, whereas others use it as a  
14  
15 secondary indicator to explore the parent point of view.  
16  
17  
18  
19

20 There are multiple experience measures available in addition to parent satisfaction,  
21  
22 including parent stress, anxiety and depression scales. Finally, it is not known the  
23  
24 degree to which parents are involved in the design of such interventions. There have  
25  
26 been no previous systematic evaluations focused on interventions measuring parent  
27  
28 satisfaction with neonatal care as an outcome.  
29  
30  
31  
32

33  
34 The aim of this review is to identify and describe neonatal interventions relating to  
35  
36 parents of infants of all gestations where an outcome was parent satisfaction. We aim  
37  
38 to report each intervention's effect on parent satisfaction, as well as parent input in  
39  
40 intervention design.  
41  
42  
43

## 44 **METHODS**

45  
46  
47 We prospectively registered this study on PROSPERO (11) (prospective register of  
48  
49 systematic reviews-CRD42017072388) and reported it using PRISMA guidelines  
50  
51 (12). We searched MEDLINE (Medical Literature Analysis and Retrieval System  
52  
53 Online), EMBASE (Excerpta Medica database), PsychINFO (Psychological  
54  
55 Information), Cochrane Central Register of Controlled Trials, CINAHL  
56  
57 (CUMULATIVE Index to NURSING and Allied HEALTH LITERATURE), HMC  
58  
59 Interventions to improve parent satisfaction in neonatal care: a systematic review v1.1 180719  
60



1  
2  
3 (Health Management Information Consortium), Maternity and Infant Care (online\_  
4 supplementary\_ file\_ 1) for English papers published between 1946-October 2017,  
5  
6 with update searches on 1<sup>st</sup> September 2018.  
7  
8  
9

10  
11  
12  Inclusion criteria were: randomised controlled trials (RCT) and non-randomised  
13 studies (non-RCT) if participants were parents of infants receiving neonatal care,  
14 interventions were implemented in neonatal units and  $\geq 1$  quantitative outcome of  
15 parent satisfaction was measured. We included studies from all neonatal care level  
16 units and all healthcare settings, without excluding studies in low or middle-income  
17 settings. We excluded systematic reviews, entirely qualitative studies, grey literature  
18 (e.g. conference abstracts), studies only reporting protocols or abstracts and full  
19 reports not in English.  
20  
21  
22  
23  
24  
25  
26  
27  
28  
29  
30

31  
32  
33 Two authors (SS, IA) independently double-screened titles and abstracts, reviewed  
34 full texts for eligibility and resolved any discrepancies with a third reviewer (JW).  
35  
36 We extracted data using a pilot-tested, standardised data extraction form including  
37 study characteristics, interventions, outcomes and parent input into interventions'  
38 design. We assessed methodological quality with the Cochrane Collaboration risk of  
39 bias tool (13) for RCT and the ROBINS-I tool (14) for non-RCT.  
40  
41  
42  
43  
44  
45  
46  
47  
48

49 We presented individual study aggregate data in a narrative synthesis, grouped  
50 studies into themes using a Grounded Theory Approach (15) and planned meta-  
51 analysis where data were appropriate for quantitative synthesis.  
52  
53  
54  
55  
56  
57

## 58 **Patient involvement**

59  
60

1  
2  
3 This review was conceived in response to the clinical need identified by parents with  
4 neonatal care experience; a partnership including families with experience of preterm  
5 birth identified “what emotional and practical support improves attachment and  
6 bonding, and does the provision of such support improve outcomes for premature  
7 babies and their families?” as a top 10 research priority (16). Additionally, this  
8 review was conceived as part of planning a wider project to pilot a neonatal  
9 intervention, with parents’ full input. Patients were not directly involved in the  
10 design, conduct, reporting or dissemination plans of our research.  
11  
12  
13  
14  
15  
16  
17  
18  
19  
20  
21  
22

## 23 RESULTS

24  
25  
26  
27  
28 We identified 8362 studies for screening and assessed 73 full text articles for  
29 eligibility (Figure 1). A total of 32 studies describing interventions to improve parent  
30 satisfaction in neonatal care met the inclusion criteria, reporting data from over 2866  
31 parents, 1 study did not report number of parents. Our analysis included 10 RCT and  
32 22 non-RCT: 3 cohort trials, 18 unspecified designs and 1 implementation project.  
33  
34  
35  
36  
37  
38  
39 We classified the unspecified non-RCT into 2 types, depending on how they defined  
40 their control groups and how they evaluated parent satisfaction (eTable 1).  
41  
42  
43

- 44 1. “*Unit- level effect*”: Studies that assessed parent satisfaction during a period  
45 of routine care (control group) and introduced the intervention at a later time,  
46 with a different group of parents. In these studies improvement in parent  
47 satisfaction was evaluated between different parent groups, on a *unit level*.  
48  
49  
50  
51  
52
- 53 2. “*Group level effect*”: Studies that formed intervention and control groups  
54 using convenience sampling during the same time period. Both groups (or  
55 sometimes only the intervention group) had satisfaction measured after the  
56  
57  
58  
59  
60

1  
2  
3 intervention period (post intervention testing). Baseline parent satisfaction  
4  
5 was also measured in both groups (pre intervention testing) in some studies.  
6  
7 Improvement in parent satisfaction was demonstrated either by comparing  
8  
9 outcomes between intervention/control groups following the intervention, or  
10  
11 in comparison with the pre-intervention data.  
12  
13  
14  
15  
16

17 Parent participants included mothers (14 studies), mothers and fathers (10 studies) or  
18  
19 were not specified (7 studies). One study defined parent participants as a dyad of the  
20  
21 mother with her designated support person. Median parent sample size was 63, range  
22  
23 (7-482). This was higher for RCT (108) compared to non-RCT studies (61). Study  
24  
25 participants included parents of babies across the full range of gestations (23-42  
26  
27 weeks). Overall, 24/32 (75%) of studies involved preterm infants, 5/32 (16%) term  
28  
29 infants and 7 studies did not state the gestational age of infants involved. Most  
30  
31 studies (19, 59%) involved only preterm infants (up to 37 weeks); only 1 study (3%)  
32  
33 involved only term infants and 5 studies (16%) involved both preterm and term  
34  
35 infants.. Preterm infants were included in 44% of RCT, versus 63% of non-RCT.  
36  
37  
38 eTable 1 shows the key characteristics of included studies.  
39  
40  
41  
42  
43  
44

#### 45 Parent satisfaction

46  
47  
48 All 32 studies reported they measured parent satisfaction as an *a priori* outcome.  
49  
50 Only one study confirmed this through a protocol. Overall 18/32 (56%) of studies  
51  
52 (4/10, 40% RCT and 14/22, 64% non-RCT) reported a higher level of parent  
53  
54 satisfaction associated with the intervention studied. Multiple different outcome  
55  
56 measures within the domain of parent satisfaction were used; we grouped these into 4  
57  
58 categories: i) Parent satisfaction (no additional description); ii) Parent satisfaction  
59  
60

1  
2  
3 with NICU care; iii) Parent satisfaction related to specific components such as  
4 communication, staff or information; iv) Parent satisfaction with a specific  
5  
6 intervention.  
7  
8  
9

10  
11  
12 Parent satisfaction was assessed using 32 different methods: 29 different  
13 questionnaires, 2 different single questions, and by structured interview in 1 study; in  
14 total 334 different questions were used to assess parent satisfaction. Only 6/29 (21%)  
15 of questionnaires were reported to be fully validated (both content validation and  
16 reliability testing); 23/29 (79%) questionnaires were partially or completely  
17 unvalidated. The most commonly used questionnaire was the validated *Neonatal*  
18 *Index of Parent Satisfaction (NIPS)* (17) questionnaire (3 studies).  
19  
20  
21  
22  
23  
24  
25  
26  
27  
28  
29  
30

### 31 Parent input into design of interventions

32  
33  
34  
35 Five studies (5/32, 16%) reported involving parents in intervention design, of which 2  
36 reported improvement of parent satisfaction. The number of included studies was too  
37 small to estimate any effect of parent co-design on the success of interventions at  
38 study level.  
39  
40  
41  
42  
43  
44  
45  
46  
47  
48  
49  
50

### 51 Interventions

52 We grouped included studies into 5 intervention themes: parent involvement (14  
53 studies); information provision/communication (8 studies); clinical care (7 studies);  
54 parent emotional support (2 studies); other (1 study). Parent involvement  
55 interventions were more commonly assessed in RCT compared to non-RCT .  
56  
57  
58  
59  
60

We categorised interventions *as effective or not effective* based upon whether a statistically significant difference between intervention and control groups was reported for parent satisfaction (Table 1). None of the studies reported significantly lower parent satisfaction in the intervention group compared to the control group. We classified studies as *unclear if effective* if they included small sample numbers or if statistical analysis was not performed. Finally, we highlighted studies where *only the intervention group was assessed and only post-intervention*, where comparison to a control group was not possible.

Overall, 18/32 studies (56%) reported higher parent satisfaction in the intervention group; 4/10 RCT and 14/22 non-RCT. The intervention theme where higher satisfaction was most consistently reported was parent involvement (10/14 studies).

Due to the large heterogeneity of outcome measure scales a quantitative synthesis and meta-analysis was not possible.

### 1. Parent involvement

### Outcome

|                                                                                                               |           |
|---------------------------------------------------------------------------------------------------------------|-----------|
| More NICU access, parents on WRs, Education (De Bernardo et al, Italy, 2017)                                  | Effective |
| More NICU access, care involvement, education (Bastani et al, Iran, 2015) <b>RCT</b>                          | Effective |
| Newborn Individualised Developmental Care and Assessment Program (NIDCAP) (Wielenga et al, Netherlands, 2006) | Effective |
| Kangaroo care (Legault and Goulet, Canada, 1995)                                                              | Effective |
| Rooming-in care (Kazemian et al, Iran, 2016)                                                                  | Effective |
| Single-family NICU rooms (Stevens et al, USA, 2011)                                                           | Effective |
| Parental Presence at Clinical Bedside Rounds (Abdel-Latif et al, Australia, 2015) <b>RCT</b>                  | Effective |
| Family-centered rounds (Voos et al, USA, 2011)                                                                | Effective |
| Infant Progress Charts filled by parents and 3 Care Planning Meetings (Penticuff and Arheart. USA, 2005)      | Effective |
| Education re: pain management (Franck et al, UK, 2011) <b>RCT</b>                                             | Effective |

1  
2  
3  
4  
5  
6  
7  
8  
9  
10  
11  
12  
13  
14  
15  
16  
17  
18  
19  
20  
21  
22  
23  
24  
25  
26  
27  
28  
29  
30  
31  
32  
33  
34  
35  
36  
37  
38  
39  
40  
41  
42  
43  
44  
45  
46  
47  
48  
49  
50  
51  
52  
53  
54  
55  
56  
57  
58  
59  
60

|                                                                                                                                        |                      |
|----------------------------------------------------------------------------------------------------------------------------------------|----------------------|
| Open Unit policy: 24/7 NICU access (Voos and Park, USA, 2014)                                                                          | Unclear if effective |
| Touch and massage for 7 days (Livingston et al, USA, 2009) <b>RCT</b>                                                                  | Unclear if effective |
| a. Massage with auditory, tactile, visual, and vestibular stimulation<br>b. Kangaroo care (Holditch-Davis et al, USA, 2013) <b>RCT</b> | Not effective        |
| Individualised, developmentally supportive family-centered care interventions (Byers et al, USA, 2006)                                 | Not effective        |

**2. Information provision / communication**

**Outcome**

|                                                                                                                                 |                                                                     |
|---------------------------------------------------------------------------------------------------------------------------------|---------------------------------------------------------------------|
| Internet-based education (Kadivar et al, Iran, 2017)                                                                            | Effective                                                           |
| Daily SMS from Electronic Patient Record (Globus et al, Israel, 2016)                                                           | Effective                                                           |
| Staff education, staff contact card given to parents, staff poster at NICU reception (Weiss et al, USA, 2010)                   | Effective                                                           |
| Provision of taped conversations with neonatologists to mothers (Koh et al, Australia, 2007) <b>RCT</b>                         | Effective                                                           |
| Clinical staff enter updates in baby diary (Van de Vijver and Evans, UK, 2015)                                                  | Unclear if effective                                                |
| Detailed information provided during consenting (Broyles et al, USA, 1992) <b>RCT</b>                                           | Unclear if effective                                                |
| Sharing information obtained from parent interviews with the primary NICU provider (Clarke-Pounder et al, USA, 2015) <b>RCT</b> | Not effective                                                       |
| Daily parent update letter from Electronic Patient Record (Palma et al, USA, 2012)                                              | Only the intervention group was assessed and only post-intervention |

**3. Clinical care**

**Outcome**

|                                                                                                                |                      |
|----------------------------------------------------------------------------------------------------------------|----------------------|
| a. Headbox oxygen for respiratory distress<br>b. CPAP for respiratory distress (Foster et al, Australia, 2008) | Effective            |
| Co-bedding infants in incubators (prospective) (Byers et al, USA, 2003)                                        | Effective            |
| Co-bedding infants in incubators (retrospective) (Polizzi et al, USA, 2003)                                    | Effective            |
| Palliative care (Petteys et al, USA, 2015)                                                                     | Unclear if effective |
| Five potentially better practices in the area of discharge planning (Mills et al, USA, 2006)                   | Unclear if effective |
| Clinical Nurse Specialist/ neonatal practitioner team care (Mitchell-DiCenso et al, Canada, 1996) <b>RCT</b>   | Not effective        |

1  
2  
3  
4  
5  
6  
7 **4. Parent emotional support**

|                                                                           | <b>Outcome</b>                                                      |
|---------------------------------------------------------------------------|---------------------------------------------------------------------|
| 9 Narrative writing (Kadivar et al, Iran, 2017)                           | Effective                                                           |
| 11 Listening visits (Segre et al, USA, 2013)                              | Only the intervention group was assessed and only post-intervention |
| 16 Tele-rounding robot, off-site neonatologist (Garingo et al, USA, 2016) | Only the intervention group was assessed and only post-intervention |

22 **5. Other**

|                                                        | <b>Outcome</b> |
|--------------------------------------------------------|----------------|
| 24 Free Parking (Northrup et al, USA, 2016) <b>RCT</b> | Not effective  |

28 **Table 1.** Interventions in themes

29  
30 Legend: *The colours illustrate each intervention's reported effect on parent*  
31 *satisfaction. Green (intervention effective): Parent satisfaction was reported to be*  
32 *statistically significantly higher in the intervention group; Red (intervention not*  
33 *effective): Parent satisfaction was not reported to be statistically significantly*  
34 *different in the intervention group; Yellow (unclear if effective): Small study numbers*  
35 *and/or no statistical analysis performed); Grey (Only the intervention group was*  
36 *assessed and only post-intervention). **RCT: Randomised Controlled Trial***

49 Methodological quality

53 For the majority of RCT, key study characteristics, such as randomisation, allocation  
54 concealment and blinding of outcome assessment, were either not stated or unclear  
55 (Figure 2). Only one RCT had an available study protocol (retrospectively registered)

1  
2  
3 and none described blinding of study participants and/or personnel. All RCT scored a  
4  
5 high/unclear risk of bias in at least 4/6 Cochrane tool categories, except for one,  
6  
7 which scored a high/unclear risk in 3/6 categories.  
8  
9

10  
11  
12 We assessed 21/22 non-RCT studies using the ROBINS-I tool (14), excluding the  
13  
14 implementation project. All 21 studies were assessed as having an overall *serious* risk  
15  
16 of bias and 7/21 of studies (33%) were further categorised as having *critical* risk of  
17  
18 bias (Figure 3). Blinding of participants, personnel and outcome assessment was  
19  
20 poorly reported across all non-RCT and no study reported a published study protocol.  
21  
22 None of the included non-RCT measured or corrected for important parent/infant  
23  
24 confounding variables, or other relevant neonatal unit co-interventions taking place at  
25  
26 the same time as the intervention.  
27  
28  
29

30  
31  
32  
33 We were unable to use the *Standards for Reporting Implementation Studies (StaRI)*  
34  
35 *Statement Tool* (18) for assessing the implementation project, as the reporting was  
36  
37 incomplete.  
38  
39

40  
41  
42 There was no association between methodological quality assessments and the  
43  
44 studies' reported effect on parent satisfaction. All 4/10 RCT that reported a higher  
45  
46 level of parent satisfaction associated with their intervention, scored a high/unclear  
47  
48 risk of bias in at least 4/6 Cochrane tool categories, one of which scored high/unclear  
49  
50 *risk* in all categories. Out of the 14/22 non-RCT reporting an improved parent  
51  
52 satisfaction, two were deemed to be at *critical risk* of bias on the ROBINS- I tool,  
53  
54 whilst the rest we assessed to be at *serious risk* of bias.  
55  
56  
57  
58  
59  
60



## DISCUSSION

Parent satisfaction with neonatal care is increasingly recognised as an important measure of parent experience and is being used to evaluate hospitals and healthcare providers; use of interventions to improve parent satisfaction in neonatal units is increasing. This is the largest review of interventions where an outcome was parent satisfaction with neonatal care and includes 32 studies. We find low quality evidence that interventions targeting parent involvement may improve parent satisfaction with neonatal care, but this result must be interpreted cautiously in view of the high risk of bias in included studies.

A further reason for only selecting parent satisfaction as the outcome of interest was to focus on a single component of parent experience, in order to reduce outcome heterogeneity and allow direct comparison. Despite this approach, the key methodological limitation identified in this review was inconsistency in how parent satisfaction is defined and measured; it is notable that the majority of questionnaires (23/29) lack validation. In keeping with neonatal studies more widely (19), this study confirms inconsistent outcome selection as a major source of research waste in neonatal studies examining parent experience, and further finds that there is limited involvement of parents in study design.

Strengths of our review include identifying studies with both mothers and fathers as participants, inclusion of the full range of infant gestations and a wide range of interventions. We followed a pre-registered protocol and report this review in line with PRISMA guidelines (12). To aid direct comparison of interventions, we only

1  
2  
3 included studies that evaluated parent experience using at least the outcome of parent  
4 satisfaction. One limitation of this approach is that by excluding studies which  
5  
6 evaluated parent experience using other measures (e.g. stress, anxiety and depressions  
7  
8 scales) we are unable to comment on interventions that targeted these other  
9  
10 components of parent experience.  
11  
12  
13  
14  
15  
16

17 Brett et al (10) systematically reviewed interventions aimed at improving the parent  
18 experience more widely, but only included parents of preterm infants. The large  
19 number of outcome domains and heterogeneity of outcome measures included in this  
20 study meant that the authors were unable to draw firm conclusions about the efficacy of  
21 interventions and that meta-analysis was not possible. The majority of our review's  
22 studies have been published in the 7 years since the Brett review, highlighting the  
23 increasing interest in this area. However, despite including all gestations and focusing  
24 on a specific aspect of parent experience, heterogeneity in measurement of parent  
25 satisfaction meant we were also unable to conduct a quantitative synthesis.  
26  
27 Inconsistency and lack of validation of instruments measuring parent satisfaction in  
28 neonatal care (specifically with family-centred care) has previously been highlighted  
29 by Dall'Oglio et al (20).  
30  
31  
32  
33  
34  
35  
36  
37  
38  
39  
40  
41  
42  
43  
44  
45  
46

47 Although 31% of included studies were RCT, all were assessed as having a high risk  
48 of bias. Randomised controlled trials are traditionally considered the highest-ranking  
49 form of evidence, however it is worth considering whether such a design is feasible  
50 or desirable to evaluate interventions targeting parent satisfaction. Parents in neonatal  
51 care talk to each other, compare notes and invariably create parent-support  
52 communities; hence it is inherently difficult to avoid contamination between parents  
53  
54  
55  
56  
57  
58  
59  
60

1  
2  
3 receiving an intervention and those who are not, meaning that blinding of parents or  
4 health professionals is near impossible. Furthermore, parent satisfaction is likely to  
5 be particularly susceptible to the Hawthorne effect (21), requiring longer-term follow  
6 up. These factors may explain the low number of RCT identified in our review and  
7 the high risk of bias seen in those that were included. In non-RCT studies, the main  
8 methodological concern is the degree to which unmeasured and uncontrolled  
9 confounders may explain any differences seen between groups. The non-RCT studies  
10 included in this review were classed as having either a serious or critical risk of bias.  
11 The overwhelming majority of studies did not adequately report baseline variables or  
12 report other interventions during the study period, making it impossible to assess  
13 studies for selection bias or treatment bias. Furthermore, limitations such as  
14 contamination bias and the Hawthorne effect affect non-RCT as well. Only two non-  
15 RCT studies evaluated the outcome of interest (parent satisfaction) both before and  
16 after the intervention, in the same group of parents (*group level effect*), with most  
17 studies evaluating different parent groups pre and post intervention (*unit level effect*).  
18 An inherent weakness of this latter approach is that it assumes parent satisfaction is a  
19 static measure at the unit level, which is unlikely to be true. As a result of these  
20 numerous important limitations identified across all included studies, we find only  
21 low-quality evidence in support of interventions to improve parent satisfaction with  
22 neonatal care, despite a majority of studies reporting a beneficial effect of  
23 interventions. These limitations may explain the limited uptake of these interventions  
24 by the wider neonatal community.

25  
26  
27  
28  
29  
30  
31  
32  
33  
34  
35  
36  
37  
38  
39  
40  
41  
42  
43  
44  
45  
46  
47  
48  
49  
50  
51  
52  
53  
54  
55  
56 Changing neonatal unit practices to incorporate any new intervention requires robust  
57 evidence. We demonstrate here that such evidence is not currently available for  
58  
59  
60

1  
2  
3 improving parent satisfaction. We highlight the use of non-randomised study designs,  
4  
5 inconsistency in definition and measurement of parent satisfaction, the use of  
6  
7 unvalidated questionnaires, methodological limitations and a lack of parent  
8  
9 involvement as contributors. Given the importance of parent satisfaction for both  
10  
11 parent and offspring wellbeing, higher quality trials that involve parents, use  
12  
13 standardised definitions and validated parent satisfaction measures are needed. Given  
14  
15 the nature and challenges of the neonatal care environment and the limitations we  
16  
17 have identified in existing research, a cluster trial may be the most appropriate study  
18  
19 design to rigorously evaluate interventions to improve parent satisfaction with  
20  
21 neonatal care.  
22  
23  
24  
25  
26  
27

## 28 **CONCLUSIONS**

29  
30 Many interventions, commonly relating to parent involvement, are reported to  
31  
32 improve parent satisfaction with neonatal care but inconsistency in definition and  
33  
34 measurement of parent satisfaction and high risk of bias in all studies makes this low  
35  
36 quality evidence. Standardised definitions and validated parent satisfaction measures  
37  
38 are needed, as well as higher quality trials of parent experience, involving parents in  
39  
40 intervention design.  
41  
42  
43  
44  
45  
46

### 47 **What is already known on this topic**

- 48  
49 • Neonatal care significantly affects parents' mental health; parent satisfaction  
50  
51 is increasingly being used as a parent experience measure
- 52  
53 • Parent satisfaction is inversely related to parent stress; interventions  
54  
55 improving parent satisfaction have the potential to reduce parent stress,  
56  
57 improve parent-infant bonding and infant outcomes  
58  
59  
60

- Use of interventions to improve parent satisfaction in neonatal units is increasing, though few are formally evaluated and wider uptake is limited; it is not known the degree to which parents are involved in intervention design

### **What this study adds**

- There is inconsistency in how parent satisfaction in neonatal care is defined and measured, and the majority of studies do not include parents in intervention design
- There is low quality evidence that interventions relating to parent involvement may improve parent satisfaction with neonatal care
- Standardised, validated measures of parent satisfaction and higher quality trials, involving parents in intervention design, are needed

### **DECLARATIONS**

#### **Conflict of interest disclosure**

SS has received research grants from the National Institute of Health Research (NIHR), the NIHR CLAHRC NWL, Rosetrees Trust and CW+ charity. NM is Director of the Neonatal Data Analysis Unit at Imperial College London. In the last five years NM has served on the Board of Trustees of the Royal College of Paediatrics and Child Health, David Harvey Trust, Medical Women's Federation and Medact; and is a member of the Nestle Scientific Advisory Board. NM has received research grants from the British Heart Foundation, Medical Research Council, National Institute of Health Research, Westminster Research Fund, Collaboration for Leadership in Applied Health and Care Northwest London,

1  
2  
3 Healthcare Quality Improvement Partnership, Bliss, Prolacta Life Sciences, Chiesi,  
4 Shire and HCA International; travel and accommodation expenses from, Nutricia,  
5 Prolacta, Nestle and Chiesi; honoraria from Ferring Pharmaceuticals and Alexion  
6 Pharmaceuticals for contributions to expert advisory boards, and Chiesi for  
7 contributing to a lecture programme. CG is funded by the United Kingdom Medical  
8 Research Council (MRC) through a Clinician Scientist Fellowship award. He has  
9 received support from Chiesi Pharmaceuticals to attend an educational conference; in  
10 the past 5 years he has been investigator on received research grants from Medical  
11 Research Council, National Institute of Health Research, Canadian Institute of Health  
12 Research, Department of Health in England, Mason Medical Research Foundation,  
13 Westminster Medical School Research Trust and Chiesi Pharmaceuticals. IA, JW,  
14 DB: None to declare.

### 31 32 **Authors' contributions**

33  
34  
35 SS and CG conceived this systematic review. The protocol was created by SS and  
36 CG. Searches were performed by SS and IA. All search results were reviewed by  
37 SS, and JW. Coding was completed by SS and JW. Data analysis was completed by  
38 SS. The first draft of the manuscript was written by SS; SS, CG and JW edited and  
39 reviewed the manuscript. All authors approved the manuscript. This article presents  
40 independent research supported by the National Institute for Health Research (NIHR)  
41  
42 The views expressed in this publication are those of the authors and not necessarily  
43 those of the NHS, the NIHR or the Department of Health and Social Care.

### 54 55 **Funding**

56  
57 This work is sponsored by Imperial College London and supported by a peer-

1  
2  
3 reviewed National Institute of Health Research Doctoral Research Fellowship,  
4  
5 awarded to SS (DRF-2017-10-172).  
6  
7  
8  
9

## 10 **References**

- 11 1. Neonatal Data Analysis Unit. Neonatal Data Analysis Unit Annual Report  
12 2015. Online. 2016: [https://www1.imperial.ac.uk/resources/69CED33F-CF8D-4727-](https://www1.imperial.ac.uk/resources/69CED33F-CF8D-4727-BC05-94A885B8699/ndau2015reportv1.4.pdf)  
13 [BC05-94A885B8699/ndau2015reportv1.4.pdf](https://www1.imperial.ac.uk/resources/69CED33F-CF8D-4727-BC05-94A885B8699/ndau2015reportv1.4.pdf)  
14  
15
- 16 2. Lefkowitz DS, Baxt C, Evans JR. Prevalence and Correlates of Posttraumatic  
17 Stress and Postpartum Depression in Parents of Infants in the Neonatal Intensive Care  
18 Unit (NICU). *J Clin Psychol Med S.* 2010;17(3):230-7.  
19  
20
- 21 3. Shaw RJ, Bernard RS, DeBlois T, Ikuta LM, Ginzburg K, Koopman C. The  
22 Relationship Between Acute Stress Disorder and Posttraumatic Stress Disorder in the  
23 Neonatal Intensive Care Unit. *Psychosomatics.* 2009;50(2):131-7.  
24  
25
- 26 4. Beck CT, Woynar J. Posttraumatic Stress in Mothers While Their Preterm  
27 Infants Are in the Newborn Intensive Care Unit: A Mixed Research Synthesis. *ANS*  
28 *Adv Nurs Sci.* 2017;40(4):337-55.  
29  
30
- 31 5. Lee SK, O'Brien K. INNOVATIONS Parents as primary caregivers in the  
32 neonatal intensive care unit. *Can Med Assoc J.* 2014;186(11):845-7.  
33  
34
- 35 6. Grace SL, Evindar A, Stewart DE. The effect of postpartum depression on  
36 child cognitive development and behavior: a review and critical analysis of the  
37 literature. *Arch Womens Ment Health.* 2003;6(4):263-74.  
38  
39
- 40 7. Rocha G, Candeias L, Ramos M, Maia T, Guimaraes H, Viana V. [Stress and  
41 satisfaction of mothers in neonatal intensive care]. *Acta Med Port.* 2011;24 Suppl  
42 2:157-66.  
43  
44  
45  
46  
47  
48  
49  
50  
51  
52  
53  
54  
55  
56  
57  
58  
59  
60

- 1  
2  
3 8. Lopez-Maestro et al. Quality of attachment in infants less than 1500g or less  
4 than 32 weeks. Related factors. *Early Hum Dev.* 2016;104:1-6.  
5  
6  
7  
8 9. Charpak N, Tessier R, Ruiz JG, Hernandez JT, Uriza F, Villegas J, et al.  
9  
10 Twenty-year Follow-up of Kangaroo Mother Care Versus Traditional Care.  
11  
12 *Pediatrics.* 2017;139(1).  
13  
14 10. Brett J, Staniszewska S, Newburn M, Jones N, Taylor L. A systematic  
15 mapping review of effective interventions for communicating with, supporting and  
16 providing information to parents of preterm infants. *BMJ Open.* 2011;1(1):e000023.  
17  
18  
19 11. PROSPERO database. Available from:  
20  
21 [http://www.crd.york.ac.uk/prospero/display\\_record.asp?ID=CRD42016042110](http://www.crd.york.ac.uk/prospero/display_record.asp?ID=CRD42016042110)  
22  
23  
24 12. Moher D, Liberati A, Tetzlaff J, Altman DG. Preferred reporting items for  
25 systematic reviews and meta-analyses: the PRISMA statement. *Annals of internal*  
26 *medicine.* 2009;151(4):264-9, W64. Epub 2009/07/23.  
27  
28  
29 13. Higgins Julian PT, Altman Douglas G, Gotzsche Peter C, Juni Peter, Moher  
30 David, Oxman Andrew D et al. The Cochrane collaboration's tool for assessing risk  
31 of bias in randomised trials. *BMJ.* 2011;343:d5928.  
32  
33  
34 14. Sterne Jonathan AC, Hernan Miguel A, Reeves Barnaby C, Savovic Jelena,  
35 Berkman Nancy D, Viswanathan Meera et al. ROBINS-I: a tool for assessing risk of  
36 bias in non-randomised studies of interventions *BMJ.* 2016; 355:i4919.  
37  
38  
39 15. Green J TN. Qualitative Methods for Health Research. London, SAGE.  
40 2014(3rd edition):SAGE.  
41  
42  
43 16. Duley L Uhm S, Oliver S et al. Top 15 UK Research Priorities for Preterm  
44 Birth. *The Lancet.* 2014;383(9934):2041-2042.  
45  
46  
47 17. Mitchell-DiCenso A, Guyatt G, Paes B, Blatz S, Kirpalani H, Fryers M et al.  
48  
49  
50  
51  
52  
53  
54  
55  
56  
57  
58  
59  
60



1  
2  
3 A new measure of parent satisfaction with medical care provided in the neonatal  
4 intensive care unit. *Journal of Clinical Epidemiology*. 1996;49(3):313-318.

5  
6  
7  
8 18. Pinnock H, Barwick M, Carpenter C, Eldridge S, Grandes G, Griffiths CJ et  
9 al for the StaRI Group. Standards for Reporting Implementation Studies (StaRI)  
10 statement. *BMJ*. 2017;356:i6795.

11  
12  
13  
14  
15 19. Webbe JWH, Ali S, Sakonidou S, Webbe T, Duffy JMN, Brunton G et al,  
16 Inconsistent outcome reporting in large neonatal trials: a systematic review, *Archives*  
17 *of Disease in Childhood - Fetal and Neonatal Edition*. Published Online First: 13  
18 May 2019; doi: 10.1136/archdischild-2019-316823

19  
20  
21  
22  
23  
24 20. Dall'Oglio, I, Mascolo, R, Gawronski, O, Tiozzo, E, Portanova, A, Ragni, A,  
25 et al. A systematic review of instruments for assessing parent satisfaction with  
26 family-centred care in neonatal intensive care units. *Acta Paediatr*. 2018;107:391-  
27  
28  
29  
30  
31  
32 402.

33  
34  
35  
36  
37 21. McCambridge J, Witton J, Elbourne DR. Systematic review of the  
38 Hawthorne effect: new concepts are needed to study research participation effects. *J*  
39 *Clin Epidemiol*. 2014;67(3):267–277.

40  
41  
42  
43  
44  
45  
46 22. Abdel-Latif ME, Boswell D, Broom M, Smith J, Davis D. Parental presence  
47 on neonatal intensive care unit clinical bedside rounds: randomised trial and focus  
48 group discussion. *Arch Dis Child Fetal Neonatal Ed*. 2015;100:F203–9.

49  
50  
51  
52 23. K.F. Pridham, A.S. Chang, What being the parent of a new baby is like:  
53 revision of an instrument, *Res. Nurs. Health* 12;1989:323–329.

54  
55 24. York Hospital NICU Discharge Survey <http://www.nann.org/pdf/09discharge>

56  
57  
58 25. Conner JM, Nelson EC. Neonatal intensive care: satisfaction measured from  
59 a parent's perspective. *Pediatrics*. 1999;103:336.

- 1  
2  
3 26. Department of Health, Toolkit for High-Quality Neonatal Services 2009,  
4 Principle 3: Care of the baby and family experience.  
5  
6  
7  
8 27. NICE, Quality standard for specialist neonatal care 2010,  
9  
10 Quality Statement No 5.  
11  
12 28. Burger SA, King J, Tallett A. "Parents' experiences of neonatal care in  
13 England". *Patient Experience Journal*. 2015;2(2):7.  
14  
15  
16  
17 29. Press Ganey Associates, I. (2004). NICU survey: Product description and  
18 psychometrics. South Bend, IN: Author.  
19  
20  
21 30. McPherson ML, Sachdeva RC, Jefferson LS. Development of a survey to  
22 measure parent satisfaction in a pediatric intensive care unit. *Crit Care Med*. 2000;28:  
23 3009–3013.  
24  
25  
26  
27  
28 31. Jenkinson C, Coulter A, Bruster S. The Picker Patient Experience  
29 Questionnaire: development and validation using data from in-patient surveys in five  
30 countries. *Int J Qual Health Care*. 2002;14:353–358.  
31  
32  
33  
34 32. Crofton C, Darby C, Farquhar M, Clancy CM. The CAHPS hospital survey:  
35 development, testing, and use. *Jt Comm J Qual Patient Saf*. 2005;31:655–659.  
36  
37  
38  
39 33. Miceli PJ. Validating a patient satisfaction survey translated into Spanish. *J*  
40 *Healthc Qual* 2004;26:4–13.  
41  
42  
43  
44 34. Conner JM, Nelson EC. Neonatal intensive care: satisfaction measured from  
45 a parent's perspective. *Pediatrics*. 1999;103(1,suppl):336–349.  
46  
47  
48  
49 35. Baggs JG. Collaborative interdisciplinary bioethical decision making in  
50 intensive care units. *Nurs Outlook*. 1993;41(3):108–112.  
51  
52  
53  
54 36. Little, GA and Edwards WH. Advancing family-centered care as a quality  
55 improvement initiative. 2000. *Proceedings of the Physical and Developmental*  
56 *Environment of the High-Risk Infant Conference*.  
57  
58  
59  
60

37. Affonso DD, Wahlberg V., Persson B. Exploration of mothers' reactions to the kangaroo method of prematurity care. *Neonatal Network*. 1989;7(6), 43-51.

### Figure / Table Legends

**Figure 1:** PRISMA Flow diagram of selected studies

**Figure 2.** Cochrane Collaboration Risk of Bias tool assessment (RCT)

Legend: Green- low risk of bias; Yellow- unclear risk of bias; Red- high risk of bias

**Figure 3.** ROBINS-I risk of bias assessment (Non-RCT)

**Table 1.** Interventions in themes

Legend: *The colours illustrate each intervention's reported effect on parent satisfaction. Green (intervention effective): Parent satisfaction was reported to be statistically significantly higher in the intervention group; Red (intervention not effective): Parent satisfaction was not reported to be statistically significantly different in the intervention group; Yellow (unclear if effective): Small study numbers and/or no statistical analysis performed); Grey (Only the intervention group was assessed and only post-intervention). **RCT:** Randomised Controlled Trial*

### Online supplementary files

**eTable 1.** Included studies by study design: Randomised controlled trials (RCT) and non-RCT

Legend: *Number in last column illustrates each intervention's reported effect on parent satisfaction: 1. Parent satisfaction was statistically significantly higher in the intervention group; 2. Parent satisfaction was not reported to be statistically*

1  
2  
3 *significantly different in the intervention group; 3. Unclear if parent satisfaction*  
4  
5 *improved (small study numbers and/or no statistical analysis performed); 4. Only the*  
6  
7 *intervention group was assessed and only post-intervention*  
8  
9

10 **File 1.** OVID MEDLINE search strategy  
11  
12

13  
14  
15 **Research checklist**  
16  
17

18  
19 PRISMA checklist  
20  
21  
22  
23  
24  
25  
26  
27  
28  
29  
30  
31  
32  
33  
34  
35  
36  
37  
38  
39  
40  
41  
42  
43  
44  
45  
46  
47  
48  
49  
50  
51  
52  
53  
54  
55  
56  
57  
58  
59  
60

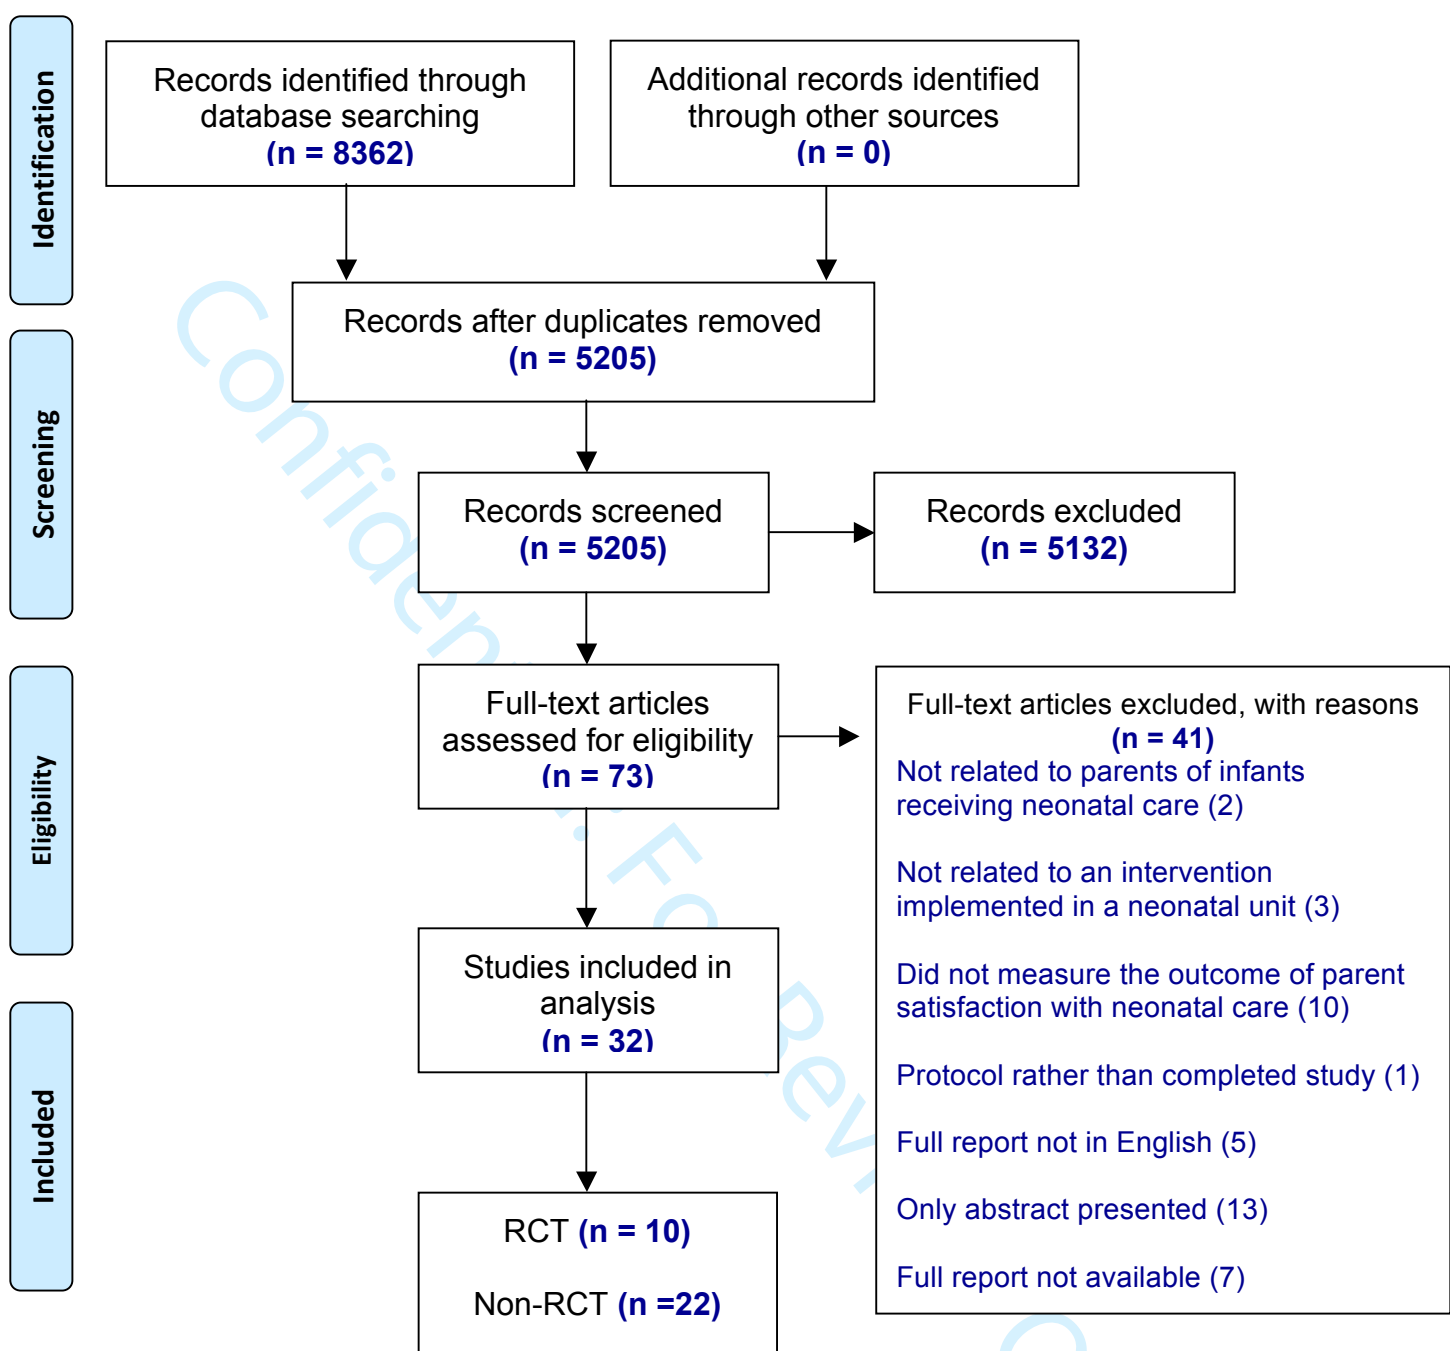

## Risk of Bias (Cochrane)

| Author<br>by publication year | Random<br>sequence<br>generation | Allocation<br>concealment | Blinding of<br>participants<br>and<br>personnel | Blinding of<br>outcome<br>assessment | Incomplete outcome data | Selective<br>reporting |
|-------------------------------|----------------------------------|---------------------------|-------------------------------------------------|--------------------------------------|-------------------------|------------------------|
| 1. Northrup (2016)            | ?                                | +                         | -                                               | ?                                    | +                       | ?                      |
| 2. Abdel-Latif<br>(2015)      | +                                | +                         | -                                               | -                                    | -                       | ?                      |
| 3. Bastani (2015)             | ?                                | ?                         | -                                               | ?                                    | +                       | ?                      |
| 4. Clarke-Pounder<br>(2015)   | ?                                | ?                         | -                                               | ?                                    | +                       | ?                      |
| 5. Holditch-Davis<br>(2013)   | +                                | +                         | -                                               | +                                    | ?                       | ?                      |
| 6. Franck (2011)              | -                                | ?                         | -                                               | ?                                    | -                       | +                      |
| 7. Livingston (2009)          | ?                                | ?                         | -                                               | ?                                    | +                       | ?                      |
| 8. Koh (2007)                 | ?                                | ?                         | -                                               | ?                                    | ?                       | ?                      |
| 9. Mitchell-DiCenso<br>(1996) | +                                | ?                         | ?                                               | ?                                    | ?                       | ?                      |
| 10. Broyles (1992)            | ?                                | ?                         | -                                               | +                                    | +                       | ?                      |

1  
2  
3  
4  
5  
6  
7  
8  
9  
10  
11  
12  
13  
14  
15  
16  
17  
18  
19  
20  
21  
22  
23  
24  
25  
26  
27  
28  
29  
30  
31  
32  
33  
34  
35  
36  
37  
38  
39  
40  
41  
42  
43  
44  
45  
46  
47

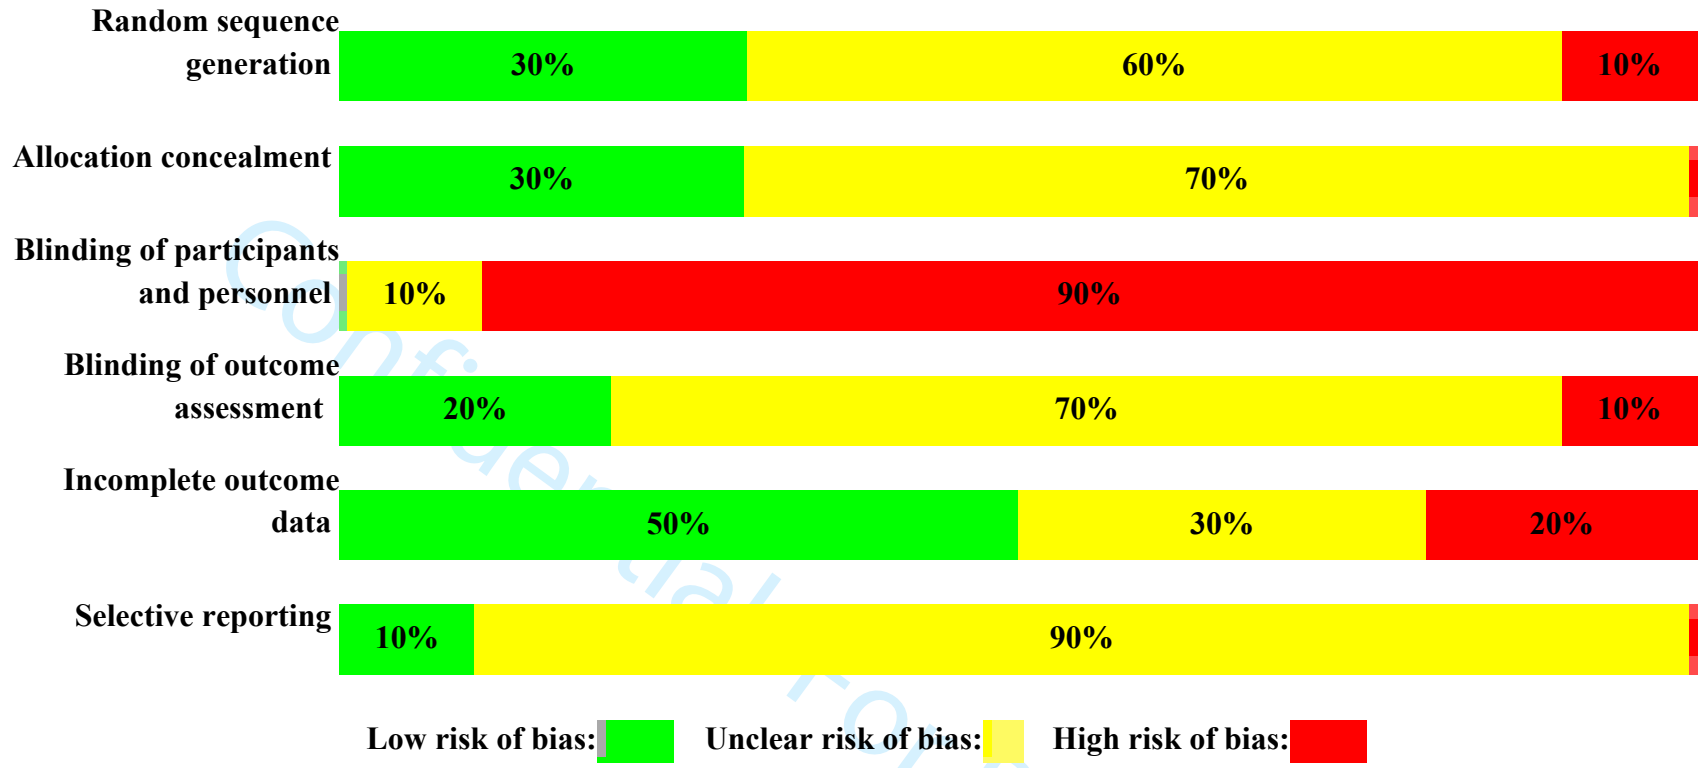

# Risk of Bias (ROBINS-I)

| Author<br>by publication<br>year                     | Bias due to<br>confounding | Bias in<br>selection of<br>participants<br>into the<br>study | Bias in<br>classification<br>of<br>interventions | Bias due to<br>deviations<br>from<br>intended<br>interventions | Bias due to<br>missing<br>data | Bias in<br>measurement<br>of outcomes | Bias in<br>selection of<br>the<br>reported<br>result | OVERALL<br>risk of bias |
|------------------------------------------------------|----------------------------|--------------------------------------------------------------|--------------------------------------------------|----------------------------------------------------------------|--------------------------------|---------------------------------------|------------------------------------------------------|-------------------------|
| 1. De Bernardo (2017)                                | SERIOUS                    | LOW                                                          | LOW                                              | SERIOUS                                                        | LOW                            | SERIOUS                               | SERIOUS                                              | SERIOUS                 |
| 2. Kadivar (2017)<br><i>Internet-based education</i> | SERIOUS                    | LOW                                                          | LOW                                              | SERIOUS                                                        | LOW                            | SERIOUS                               | MODERATE                                             | SERIOUS                 |
| 3. Kadivar (2017)<br><i>Narrative writing</i>        | SERIOUS                    | SERIOUS                                                      | LOW                                              | SERIOUS                                                        | LOW                            | SERIOUS                               | MODERATE                                             | SERIOUS                 |
| 4. Garingo (2016)                                    | CRITICAL                   | LOW                                                          | LOW                                              | SERIOUS                                                        | SERIOUS                        | SERIOUS                               | SERIOUS                                              | CRITICAL                |
| 5. Globus (2016)                                     | SERIOUS                    | LOW                                                          | LOW                                              | NO INFO                                                        | SERIOUS                        | SERIOUS                               | SERIOUS                                              | SERIOUS                 |
| 6. Kazemian (2016)                                   | SERIOUS                    | NO INFO                                                      | LOW                                              | SERIOUS                                                        | NO INFO                        | SERIOUS                               | SERIOUS                                              | SERIOUS                 |
| 7. Petteys (2015)                                    | SERIOUS                    | LOW                                                          | LOW                                              | SERIOUS                                                        | MODERATE                       | SERIOUS                               | MODERATE                                             | SERIOUS                 |
| 8. Van de Vijver (2015)                              | CRITICAL                   | LOW                                                          | LOW                                              | SERIOUS                                                        | MODERATE                       | SERIOUS                               | MODERATE                                             | CRITICAL                |
| 9. Voos (2013)                                       | CRITICAL                   | LOW                                                          | LOW                                              | SERIOUS                                                        | NO INFO                        | SERIOUS                               | SERIOUS                                              | CRITICAL                |
| 10. Segre (2013)                                     | CRITICAL                   | NO INFO                                                      | LOW                                              | SERIOUS                                                        | SERIOUS                        | SERIOUS                               | MODERATE                                             | CRITICAL                |
| 11. Palma (2012)                                     | CRITICAL                   | NO INFO                                                      | LOW                                              | SERIOUS                                                        | SERIOUS                        | SERIOUS                               | CRITICAL                                             | CRITICAL                |
| 12. Stevens (2011)                                   | SERIOUS                    | LOW                                                          | LOW                                              | SERIOUS                                                        | SERIOUS                        | SERIOUS                               | MODERATE                                             | SERIOUS                 |
| 13. Voos (2011)                                      | SERIOUS                    | LOW                                                          | LOW                                              | SERIOUS                                                        | SERIOUS                        | SERIOUS                               | MODERATE                                             | SERIOUS                 |
| 14. Weiss (2010)                                     | SERIOUS                    | LOW                                                          | LOW                                              | SERIOUS                                                        | LOW                            | SERIOUS                               | MODERATE                                             | SERIOUS                 |
| 15. Foster (2008)                                    | SERIOUS                    | CRITICAL                                                     | LOW                                              | SERIOUS                                                        | SERIOUS                        | SERIOUS                               | MODERATE                                             | CRITICAL                |
| 16. Byers (2006)                                     | SERIOUS                    | LOW                                                          | LOW                                              | SERIOUS                                                        | SERIOUS                        | SERIOUS                               | MODERATE                                             | SERIOUS                 |
| 18. Wielenga (2006)                                  | SERIOUS                    | LOW                                                          | LOW                                              | SERIOUS                                                        | LOW                            | SERIOUS                               | MODERATE                                             | SERIOUS                 |
| 19. Penticuff (2005)                                 | SERIOUS                    | LOW                                                          | LOW                                              | SERIOUS                                                        | LOW                            | SERIOUS                               | MODERATE                                             | SERIOUS                 |
| 20. Byers (2003)                                     | SERIOUS                    | LOW                                                          | LOW                                              | SERIOUS                                                        | LOW                            | SERIOUS                               | SERIOUS                                              | SERIOUS                 |
| 21. Polizzi (2003)                                   | SERIOUS                    | MODERATE                                                     | LOW                                              | SERIOUS                                                        | SERIOUS                        | SERIOUS                               | MODERATE                                             | SERIOUS                 |
| 22. Legault (1995)                                   | SERIOUS                    | CRITICAL                                                     | LOW                                              | CRITICAL                                                       | LOW                            | SERIOUS                               | MODERATE                                             | CRITICAL                |



## Randomised controlled trials (RCT) by publication year

| Author (Date), Country                                                                                               | Parents' gender/ Total sample Size | Infants' Gestational age (GA) in weeks  | Study design                                      | Intervention                                                                                                                                                                                                                                                                                                                                                                                      | Outcome measures                                                                                                                                                     | Timing of measurement                                                                                                                                                                            | Method of measurement                                                                                                                                                                                                                                                                                                                                                                                                                                                                                                   | Results                                                                                                                                                                                                                                                                                                                                                                                                                                                                                                                                                                                                                                                                                                                                                                                                                                                                                                                                                                                                                                                                                                                                                                                                                                                                                                           | Was the intervention co-designed with parents | Improved parent satisfaction? |         |         |                                                                                                       |  |  |  |                                                  |          |            |      |                                                                                                                      |            |            |      |                                 |       |       |      |                                                                                                           |   |  |  |                   |       |       |      |                                                                                               |  |  |  |                   |       |       |       |    |   |
|----------------------------------------------------------------------------------------------------------------------|------------------------------------|-----------------------------------------|---------------------------------------------------|---------------------------------------------------------------------------------------------------------------------------------------------------------------------------------------------------------------------------------------------------------------------------------------------------------------------------------------------------------------------------------------------------|----------------------------------------------------------------------------------------------------------------------------------------------------------------------|--------------------------------------------------------------------------------------------------------------------------------------------------------------------------------------------------|-------------------------------------------------------------------------------------------------------------------------------------------------------------------------------------------------------------------------------------------------------------------------------------------------------------------------------------------------------------------------------------------------------------------------------------------------------------------------------------------------------------------------|-------------------------------------------------------------------------------------------------------------------------------------------------------------------------------------------------------------------------------------------------------------------------------------------------------------------------------------------------------------------------------------------------------------------------------------------------------------------------------------------------------------------------------------------------------------------------------------------------------------------------------------------------------------------------------------------------------------------------------------------------------------------------------------------------------------------------------------------------------------------------------------------------------------------------------------------------------------------------------------------------------------------------------------------------------------------------------------------------------------------------------------------------------------------------------------------------------------------------------------------------------------------------------------------------------------------|-----------------------------------------------|-------------------------------|---------|---------|-------------------------------------------------------------------------------------------------------|--|--|--|--------------------------------------------------|----------|------------|------|----------------------------------------------------------------------------------------------------------------------|------------|------------|------|---------------------------------|-------|-------|------|-----------------------------------------------------------------------------------------------------------|---|--|--|-------------------|-------|-------|------|-----------------------------------------------------------------------------------------------|--|--|--|-------------------|-------|-------|-------|----|---|
| 1. Northrup et al. (2016), USA                                                                                       | Mothers and fathers /116           | <28                                     | Randomised controlled trial                       | <p><b>Intervention: Free Parking (FP).</b></p> <p>Parents received seven parking vouchers at a time (value: \$10/each) from the hospital's research office and continued to receive vouchers until infant discharge. Each voucher allowed free entry and exit for a 24-h period (including re-entry).</p> <p><b>Control:</b> Parents received the standard care and did not receive vouchers.</p> | Parent satisfaction with NICU care                                                                                                                                   | <p>After babies were discharged (once)</p> <p>- During the first high-risk-infant clinic visit after discharge</p> <p>No pre-intervention parent satisfaction data available for comparison.</p> | <p>Satisfaction questionnaire</p> <p><b>Validation:</b> No content validity or reliability testing reported.</p> <p>11 questions</p> <p>- Seven items were summed (score 7-35) to measure "Support" (e.g., information sharing).</p> <p>- Three items measured "Emotional Connection" to the infant (score 3-15)</p> <p>- One item assessed "family involvement in infant care" (responses: not enough-just right-too much).</p> <p>Greater scores indicated higher perceived support, connection and satisfaction.</p> | <p><b>The groups did not differ significantly with respect to satisfaction.</b></p> <table border="1"> <thead> <tr> <th></th> <th>Intervention</th> <th>Control</th> <th>p-value</th> </tr> </thead> <tbody> <tr> <td>Mean (SD)</td> <td></td> <td></td> <td></td> </tr> <tr> <td>NICU support:</td> <td>30 (2.7)</td> <td>28.7 (3.7)</td> <td>0.07</td> </tr> <tr> <td>Emotional connection:</td> <td>12.3 (1.7)</td> <td>12.3 (1.7)</td> <td>0.96</td> </tr> <tr> <td>Family involvement "Just right"</td> <td>81.4%</td> <td>85%</td> <td>0.07</td> </tr> </tbody> </table>                                                                                                                                                                                                                                                                                                                                                                                                                                                                                                                                                                                                                                                                                                                                    |                                               | Intervention                  | Control | p-value | Mean (SD)                                                                                             |  |  |  | NICU support:                                    | 30 (2.7) | 28.7 (3.7) | 0.07 | Emotional connection:                                                                                                | 12.3 (1.7) | 12.3 (1.7) | 0.96 | Family involvement "Just right" | 81.4% | 85%   | 0.07 | No                                                                                                        | 2 |  |  |                   |       |       |      |                                                                                               |  |  |  |                   |       |       |       |    |   |
|                                                                                                                      | Intervention                       | Control                                 | p-value                                           |                                                                                                                                                                                                                                                                                                                                                                                                   |                                                                                                                                                                      |                                                                                                                                                                                                  |                                                                                                                                                                                                                                                                                                                                                                                                                                                                                                                         |                                                                                                                                                                                                                                                                                                                                                                                                                                                                                                                                                                                                                                                                                                                                                                                                                                                                                                                                                                                                                                                                                                                                                                                                                                                                                                                   |                                               |                               |         |         |                                                                                                       |  |  |  |                                                  |          |            |      |                                                                                                                      |            |            |      |                                 |       |       |      |                                                                                                           |   |  |  |                   |       |       |      |                                                                                               |  |  |  |                   |       |       |       |    |   |
| Mean (SD)                                                                                                            |                                    |                                         |                                                   |                                                                                                                                                                                                                                                                                                                                                                                                   |                                                                                                                                                                      |                                                                                                                                                                                                  |                                                                                                                                                                                                                                                                                                                                                                                                                                                                                                                         |                                                                                                                                                                                                                                                                                                                                                                                                                                                                                                                                                                                                                                                                                                                                                                                                                                                                                                                                                                                                                                                                                                                                                                                                                                                                                                                   |                                               |                               |         |         |                                                                                                       |  |  |  |                                                  |          |            |      |                                                                                                                      |            |            |      |                                 |       |       |      |                                                                                                           |   |  |  |                   |       |       |      |                                                                                               |  |  |  |                   |       |       |       |    |   |
| NICU support:                                                                                                        | 30 (2.7)                           | 28.7 (3.7)                              | 0.07                                              |                                                                                                                                                                                                                                                                                                                                                                                                   |                                                                                                                                                                      |                                                                                                                                                                                                  |                                                                                                                                                                                                                                                                                                                                                                                                                                                                                                                         |                                                                                                                                                                                                                                                                                                                                                                                                                                                                                                                                                                                                                                                                                                                                                                                                                                                                                                                                                                                                                                                                                                                                                                                                                                                                                                                   |                                               |                               |         |         |                                                                                                       |  |  |  |                                                  |          |            |      |                                                                                                                      |            |            |      |                                 |       |       |      |                                                                                                           |   |  |  |                   |       |       |      |                                                                                               |  |  |  |                   |       |       |       |    |   |
| Emotional connection:                                                                                                | 12.3 (1.7)                         | 12.3 (1.7)                              | 0.96                                              |                                                                                                                                                                                                                                                                                                                                                                                                   |                                                                                                                                                                      |                                                                                                                                                                                                  |                                                                                                                                                                                                                                                                                                                                                                                                                                                                                                                         |                                                                                                                                                                                                                                                                                                                                                                                                                                                                                                                                                                                                                                                                                                                                                                                                                                                                                                                                                                                                                                                                                                                                                                                                                                                                                                                   |                                               |                               |         |         |                                                                                                       |  |  |  |                                                  |          |            |      |                                                                                                                      |            |            |      |                                 |       |       |      |                                                                                                           |   |  |  |                   |       |       |      |                                                                                               |  |  |  |                   |       |       |       |    |   |
| Family involvement "Just right"                                                                                      | 81.4%                              | 85%                                     | 0.07                                              |                                                                                                                                                                                                                                                                                                                                                                                                   |                                                                                                                                                                      |                                                                                                                                                                                                  |                                                                                                                                                                                                                                                                                                                                                                                                                                                                                                                         |                                                                                                                                                                                                                                                                                                                                                                                                                                                                                                                                                                                                                                                                                                                                                                                                                                                                                                                                                                                                                                                                                                                                                                                                                                                                                                                   |                                               |                               |         |         |                                                                                                       |  |  |  |                                                  |          |            |      |                                                                                                                      |            |            |      |                                 |       |       |      |                                                                                                           |   |  |  |                   |       |       |      |                                                                                               |  |  |  |                   |       |       |       |    |   |
| 2. Abdel-Latif et al. (2015), Australia                                                                              | Mothers and fathers /63            | 25-42                                   | Cross-over Randomised Controlled Trial            | <p><b>Intervention: Parental Presence at Clinical Bedside Rounds (PPCBR).</b></p> <p>Parents attended bedside clinical rounds. Parents had opportunity to ask questions about their baby's condition and management.</p> <p><b>Control:</b> Parents received the standard care with no parental presence at bedside clinical rounds.</p>                                                          | Parent satisfaction as assessed by questions of 3 domains:<br>1. Knowledge and understanding<br>2. Communication and collaboration<br>3. Privacy and confidentiality | <p>During babies' admission (once)</p> <p>- At the end of each study arm, separated by a washout period</p> <p>- No pre-intervention parent satisfaction data available for comparison</p>       | <p>Satisfaction questionnaire</p> <p>The authors stated "the research team designed the questionnaire".</p> <p><b>Validation:</b> No content validity or reliability testing reported.</p> <p>Number and format of questions: not stated</p>                                                                                                                                                                                                                                                                            | <p><b>PPCBR had significantly higher adjusted mean (95% CI) scores for some questions from domains 1 and 2.</b></p> <p>Domain 3 was comparable between the two study groups.</p> <table border="1"> <thead> <tr> <th></th> <th>Intervention</th> <th>Control</th> <th>p-value</th> </tr> </thead> <tbody> <tr> <td>Domain 1 question:<br/>"I have received adequate information about my baby's condition and management"</td> <td></td> <td></td> <td></td> </tr> <tr> <td>Mean satisfaction</td> <td>4.321</td> <td>3.947</td> <td>0.03</td> </tr> <tr> <td>Domain 2 questions:<br/>"In the last week I have been able to communicate effectively with my baby's healthcare team"</td> <td></td> <td></td> <td></td> </tr> <tr> <td>Mean satisfaction</td> <td>4.407</td> <td>4.250</td> <td>0.05</td> </tr> <tr> <td>"In the last week I have collaborated with my baby's healthcare team in the planning of care for my baby"</td> <td></td> <td></td> <td></td> </tr> <tr> <td>Mean satisfaction</td> <td>3.843</td> <td>3.426</td> <td>0.02</td> </tr> <tr> <td>"In the last week I have been able to ask the healthcare team questions about my baby's care"</td> <td></td> <td></td> <td></td> </tr> <tr> <td>Mean satisfaction</td> <td>4.642</td> <td>4.259</td> <td>0.004</td> </tr> </tbody> </table> |                                               | Intervention                  | Control | p-value | Domain 1 question:<br>"I have received adequate information about my baby's condition and management" |  |  |  | Mean satisfaction                                | 4.321    | 3.947      | 0.03 | Domain 2 questions:<br>"In the last week I have been able to communicate effectively with my baby's healthcare team" |            |            |      | Mean satisfaction               | 4.407 | 4.250 | 0.05 | "In the last week I have collaborated with my baby's healthcare team in the planning of care for my baby" |   |  |  | Mean satisfaction | 3.843 | 3.426 | 0.02 | "In the last week I have been able to ask the healthcare team questions about my baby's care" |  |  |  | Mean satisfaction | 4.642 | 4.259 | 0.004 | No | 1 |
|                                                                                                                      | Intervention                       | Control                                 | p-value                                           |                                                                                                                                                                                                                                                                                                                                                                                                   |                                                                                                                                                                      |                                                                                                                                                                                                  |                                                                                                                                                                                                                                                                                                                                                                                                                                                                                                                         |                                                                                                                                                                                                                                                                                                                                                                                                                                                                                                                                                                                                                                                                                                                                                                                                                                                                                                                                                                                                                                                                                                                                                                                                                                                                                                                   |                                               |                               |         |         |                                                                                                       |  |  |  |                                                  |          |            |      |                                                                                                                      |            |            |      |                                 |       |       |      |                                                                                                           |   |  |  |                   |       |       |      |                                                                                               |  |  |  |                   |       |       |       |    |   |
| Domain 1 question:<br>"I have received adequate information about my baby's condition and management"                |                                    |                                         |                                                   |                                                                                                                                                                                                                                                                                                                                                                                                   |                                                                                                                                                                      |                                                                                                                                                                                                  |                                                                                                                                                                                                                                                                                                                                                                                                                                                                                                                         |                                                                                                                                                                                                                                                                                                                                                                                                                                                                                                                                                                                                                                                                                                                                                                                                                                                                                                                                                                                                                                                                                                                                                                                                                                                                                                                   |                                               |                               |         |         |                                                                                                       |  |  |  |                                                  |          |            |      |                                                                                                                      |            |            |      |                                 |       |       |      |                                                                                                           |   |  |  |                   |       |       |      |                                                                                               |  |  |  |                   |       |       |       |    |   |
| Mean satisfaction                                                                                                    | 4.321                              | 3.947                                   | 0.03                                              |                                                                                                                                                                                                                                                                                                                                                                                                   |                                                                                                                                                                      |                                                                                                                                                                                                  |                                                                                                                                                                                                                                                                                                                                                                                                                                                                                                                         |                                                                                                                                                                                                                                                                                                                                                                                                                                                                                                                                                                                                                                                                                                                                                                                                                                                                                                                                                                                                                                                                                                                                                                                                                                                                                                                   |                                               |                               |         |         |                                                                                                       |  |  |  |                                                  |          |            |      |                                                                                                                      |            |            |      |                                 |       |       |      |                                                                                                           |   |  |  |                   |       |       |      |                                                                                               |  |  |  |                   |       |       |       |    |   |
| Domain 2 questions:<br>"In the last week I have been able to communicate effectively with my baby's healthcare team" |                                    |                                         |                                                   |                                                                                                                                                                                                                                                                                                                                                                                                   |                                                                                                                                                                      |                                                                                                                                                                                                  |                                                                                                                                                                                                                                                                                                                                                                                                                                                                                                                         |                                                                                                                                                                                                                                                                                                                                                                                                                                                                                                                                                                                                                                                                                                                                                                                                                                                                                                                                                                                                                                                                                                                                                                                                                                                                                                                   |                                               |                               |         |         |                                                                                                       |  |  |  |                                                  |          |            |      |                                                                                                                      |            |            |      |                                 |       |       |      |                                                                                                           |   |  |  |                   |       |       |      |                                                                                               |  |  |  |                   |       |       |       |    |   |
| Mean satisfaction                                                                                                    | 4.407                              | 4.250                                   | 0.05                                              |                                                                                                                                                                                                                                                                                                                                                                                                   |                                                                                                                                                                      |                                                                                                                                                                                                  |                                                                                                                                                                                                                                                                                                                                                                                                                                                                                                                         |                                                                                                                                                                                                                                                                                                                                                                                                                                                                                                                                                                                                                                                                                                                                                                                                                                                                                                                                                                                                                                                                                                                                                                                                                                                                                                                   |                                               |                               |         |         |                                                                                                       |  |  |  |                                                  |          |            |      |                                                                                                                      |            |            |      |                                 |       |       |      |                                                                                                           |   |  |  |                   |       |       |      |                                                                                               |  |  |  |                   |       |       |       |    |   |
| "In the last week I have collaborated with my baby's healthcare team in the planning of care for my baby"            |                                    |                                         |                                                   |                                                                                                                                                                                                                                                                                                                                                                                                   |                                                                                                                                                                      |                                                                                                                                                                                                  |                                                                                                                                                                                                                                                                                                                                                                                                                                                                                                                         |                                                                                                                                                                                                                                                                                                                                                                                                                                                                                                                                                                                                                                                                                                                                                                                                                                                                                                                                                                                                                                                                                                                                                                                                                                                                                                                   |                                               |                               |         |         |                                                                                                       |  |  |  |                                                  |          |            |      |                                                                                                                      |            |            |      |                                 |       |       |      |                                                                                                           |   |  |  |                   |       |       |      |                                                                                               |  |  |  |                   |       |       |       |    |   |
| Mean satisfaction                                                                                                    | 3.843                              | 3.426                                   | 0.02                                              |                                                                                                                                                                                                                                                                                                                                                                                                   |                                                                                                                                                                      |                                                                                                                                                                                                  |                                                                                                                                                                                                                                                                                                                                                                                                                                                                                                                         |                                                                                                                                                                                                                                                                                                                                                                                                                                                                                                                                                                                                                                                                                                                                                                                                                                                                                                                                                                                                                                                                                                                                                                                                                                                                                                                   |                                               |                               |         |         |                                                                                                       |  |  |  |                                                  |          |            |      |                                                                                                                      |            |            |      |                                 |       |       |      |                                                                                                           |   |  |  |                   |       |       |      |                                                                                               |  |  |  |                   |       |       |       |    |   |
| "In the last week I have been able to ask the healthcare team questions about my baby's care"                        |                                    |                                         |                                                   |                                                                                                                                                                                                                                                                                                                                                                                                   |                                                                                                                                                                      |                                                                                                                                                                                                  |                                                                                                                                                                                                                                                                                                                                                                                                                                                                                                                         |                                                                                                                                                                                                                                                                                                                                                                                                                                                                                                                                                                                                                                                                                                                                                                                                                                                                                                                                                                                                                                                                                                                                                                                                                                                                                                                   |                                               |                               |         |         |                                                                                                       |  |  |  |                                                  |          |            |      |                                                                                                                      |            |            |      |                                 |       |       |      |                                                                                                           |   |  |  |                   |       |       |      |                                                                                               |  |  |  |                   |       |       |       |    |   |
| Mean satisfaction                                                                                                    | 4.642                              | 4.259                                   | 0.004                                             |                                                                                                                                                                                                                                                                                                                                                                                                   |                                                                                                                                                                      |                                                                                                                                                                                                  |                                                                                                                                                                                                                                                                                                                                                                                                                                                                                                                         |                                                                                                                                                                                                                                                                                                                                                                                                                                                                                                                                                                                                                                                                                                                                                                                                                                                                                                                                                                                                                                                                                                                                                                                                                                                                                                                   |                                               |                               |         |         |                                                                                                       |  |  |  |                                                  |          |            |      |                                                                                                                      |            |            |      |                                 |       |       |      |                                                                                                           |   |  |  |                   |       |       |      |                                                                                               |  |  |  |                   |       |       |       |    |   |
| 3. Bastani et al, (2015), Iran                                                                                       | Mothers /100                       | 30-37 Mean (SD)<br>Control 33.90 (2.33) | Randomised Controlled Trial (block randomization) | <p><b>Intervention: Family-centered Care (FCC).</b></p> <p>Mothers were allowed access to their baby at any time, participated in the</p>                                                                                                                                                                                                                                                         | Maternal satisfaction relating to three themes:<br>1. Parental presence<br>2. Participation in                                                                       | <p>During babies' admission (twice)</p> <p>- 24 hours after admission</p>                                                                                                                        | <p>Satisfaction questionnaire (Validated)</p> <p>A modified satisfaction questionnaire was used,</p>                                                                                                                                                                                                                                                                                                                                                                                                                    | <p><b>In the FCC group, pre and post intervention difference in maternal satisfaction was statistically significant p&lt;0.001</b></p> <table border="1"> <thead> <tr> <th>Satisfaction</th> <th>Intervention</th> <th>Control</th> <th>p-value</th> </tr> </thead> <tbody> <tr> <td></td> <td></td> <td></td> <td></td> </tr> </tbody> </table>                                                                                                                                                                                                                                                                                                                                                                                                                                                                                                                                                                                                                                                                                                                                                                                                                                                                                                                                                                  | Satisfaction                                  | Intervention                  | Control | p-value |                                                                                                       |  |  |  | Unclear<br>Mothers determined the reliability of | 1        |            |      |                                                                                                                      |            |            |      |                                 |       |       |      |                                                                                                           |   |  |  |                   |       |       |      |                                                                                               |  |  |  |                   |       |       |       |    |   |
| Satisfaction                                                                                                         | Intervention                       | Control                                 | p-value                                           |                                                                                                                                                                                                                                                                                                                                                                                                   |                                                                                                                                                                      |                                                                                                                                                                                                  |                                                                                                                                                                                                                                                                                                                                                                                                                                                                                                                         |                                                                                                                                                                                                                                                                                                                                                                                                                                                                                                                                                                                                                                                                                                                                                                                                                                                                                                                                                                                                                                                                                                                                                                                                                                                                                                                   |                                               |                               |         |         |                                                                                                       |  |  |  |                                                  |          |            |      |                                                                                                                      |            |            |      |                                 |       |       |      |                                                                                                           |   |  |  |                   |       |       |      |                                                                                               |  |  |  |                   |       |       |       |    |   |
|                                                                                                                      |                                    |                                         |                                                   |                                                                                                                                                                                                                                                                                                                                                                                                   |                                                                                                                                                                      |                                                                                                                                                                                                  |                                                                                                                                                                                                                                                                                                                                                                                                                                                                                                                         |                                                                                                                                                                                                                                                                                                                                                                                                                                                                                                                                                                                                                                                                                                                                                                                                                                                                                                                                                                                                                                                                                                                                                                                                                                                                                                                   |                                               |                               |         |         |                                                                                                       |  |  |  |                                                  |          |            |      |                                                                                                                      |            |            |      |                                 |       |       |      |                                                                                                           |   |  |  |                   |       |       |      |                                                                                               |  |  |  |                   |       |       |       |    |   |



|                                                                                                                                                                                                                                              |                                 |              |                                                                      |                                                                                                                                                                                                                                                                                                                                                                                                          |                                                                                                                                                                                                                                                                                                                                                                                                                                                                                                                                                                                               |                                                                                                                                                             |                                                                                                                                                                                                                                                                                                                                                                                                           |                                                                                                                                                                                                                                                                                                                                                                                                                                                                                                                                                                                                                                                                                                                                                                                                                                                                                                                      |                                                                                                                                                                                                                                                                                                                                                                                                                                                                                                                                                                                                                                                                                                                            |    |   |
|----------------------------------------------------------------------------------------------------------------------------------------------------------------------------------------------------------------------------------------------|---------------------------------|--------------|----------------------------------------------------------------------|----------------------------------------------------------------------------------------------------------------------------------------------------------------------------------------------------------------------------------------------------------------------------------------------------------------------------------------------------------------------------------------------------------|-----------------------------------------------------------------------------------------------------------------------------------------------------------------------------------------------------------------------------------------------------------------------------------------------------------------------------------------------------------------------------------------------------------------------------------------------------------------------------------------------------------------------------------------------------------------------------------------------|-------------------------------------------------------------------------------------------------------------------------------------------------------------|-----------------------------------------------------------------------------------------------------------------------------------------------------------------------------------------------------------------------------------------------------------------------------------------------------------------------------------------------------------------------------------------------------------|----------------------------------------------------------------------------------------------------------------------------------------------------------------------------------------------------------------------------------------------------------------------------------------------------------------------------------------------------------------------------------------------------------------------------------------------------------------------------------------------------------------------------------------------------------------------------------------------------------------------------------------------------------------------------------------------------------------------------------------------------------------------------------------------------------------------------------------------------------------------------------------------------------------------|----------------------------------------------------------------------------------------------------------------------------------------------------------------------------------------------------------------------------------------------------------------------------------------------------------------------------------------------------------------------------------------------------------------------------------------------------------------------------------------------------------------------------------------------------------------------------------------------------------------------------------------------------------------------------------------------------------------------------|----|---|
| 1<br>2<br>3<br>4<br>5<br>6<br>7<br>8<br>9<br>10<br>11<br>12<br>13<br>14<br>15                                                                                                                                                                |                                 |              |                                                                      | how to apply the comforting techniques described in the booklet.<br><br><b>Control:</b> As part of usual care, parents in both the intervention and control groups received a detailed booklet with generic information about NICU care. Parents in the control group also received 2 visits from a research nurse listening to what parents had to say about their NICU experience (attention placebo). | <i>information about pain control</i><br><br>2. <i>Satisfied nurses make infant comfortable</i><br><br>3. <i>Satisfied pain medicines help infant</i>                                                                                                                                                                                                                                                                                                                                                                                                                                         | intervention                                                                                                                                                | measured by 1 question: "Satisfaction with NICU care" (1 very satisfied-6 very unsatisfied) as part of the baseline parent characteristics questionnaire.<br><br>2. One week after the intervention:<br><br>Three questions using the word "satisfied" were selected from the validated <i>Parent Attitudes About Infant Nociception (PAIN)</i> survey (Likert scale 1 very satisfied-6 very unsatisfied) | <b>parents were more satisfied with the information about pain control received than control parents.</b><br><br><b>Satisfaction Mean (SD):</b> <b>Intervention</b> 2.10 (0.97) <b>Control</b> 3.28 (1.27) <b>p-value</b> < 0.001                                                                                                                                                                                                                                                                                                                                                                                                                                                                                                                                                                                                                                                                                    | Kingdom.                                                                                                                                                                                                                                                                                                                                                                                                                                                                                                                                                                                                                                                                                                                   |    |   |
| 16<br>17<br>18<br>19<br>20<br>21<br>22<br>23<br>24<br>25<br>26<br>27<br>28<br>29<br>30<br>31<br>32<br>33<br>34<br>35<br>36<br>37<br>38<br>39<br>40<br>41<br>42<br>43<br>44<br>45<br>46<br>47<br>48<br>49<br>50<br>51<br>52<br>53<br>54<br>55 | 7.Livingston et al. (2009), USA | Mothers /12  | Mean (SD)<br><br>Control: 33.4 (6.4)<br><br>Intervention: 38.5 (3.1) | Randomised Controlled Trial                                                                                                                                                                                                                                                                                                                                                                              | <b>Intervention: Touch and massage.</b><br><br>Mothers attended a 1-hour massage class taught by a nurse CIMI (certified infant massage instructor) and were subsequently asked to participate in at least three bedside massage instruction sessions taught within the next week. Infants received massage for seven consecutive days, from the mother or a CIMI. The touch procedure lasted 20 minutes.<br><br><b>Control:</b> Infants received all usual hospital services including medical care, physical and occupational therapy services and developmentally supportive nursing care. | 1. <i>Caregiver (mother) satisfaction with their infant's care</i><br><br>2. <i>Caregiver satisfaction with the neonatal unit and the massage therapist</i> | During babies' admission (three times)<br><br>- At baseline<br><br>- Upon completing the 7-day massage program<br><br>- 1 month following intervention                                                                                                                                                                                                                                                    | <i>Satisfaction questionnaire</i><br><br>Two questionnaires were developed by the research team.<br><br><b>Validation:</b> No content validity or reliability testing reported.<br><br>-1 <sup>st</sup> questionnaire (at baseline): a brief self-report questionnaire about caregiver satisfaction with their infant's care until that moment. No further details reported.<br><br>-2 <sup>nd</sup> questionnaire (upon completing the 7-day massage program and 1 month following intervention): a 10-minute satisfaction questionnaire relating to infant's response and caregiver satisfaction with the neonatal unit and the massage therapist.<br><br><b>Number of questions:</b> not stated.<br><br>Likert scale (1 very dissatisfied-4 very satisfied).<br><br>Sample statements:<br>'How satisfied do you feel giving massage to your infant?'<br>'I feel that massage improved my infant's hospital stay.' | <b>It is unclear in the report if specific between-group comparisons and statistical analysis were conducted.</b><br><br><b>At baseline and day 7:</b><br>All caregivers were highly satisfied with the medical treatment their infant received.<br><br><b>At day 7 and 1 month follow-up:</b><br>All caregivers participating in the massage group reported high levels of satisfaction regarding their relationship with their infant and the massage program's impact on that relationship.<br><br>Slight improvements in satisfaction regarding time the caregiver spent with the infant and involvement in the infant's care were observed between day 7 and the 1-month follow-up (no further information reported). | No | 3 |
| 56<br>57<br>58<br>59<br>60                                                                                                                                                                                                                   | 8. Koh et al. (2007), Australia | Mothers /200 | Not stated                                                           | Randomised, Controlled Trial                                                                                                                                                                                                                                                                                                                                                                             | <b>Intervention: Provision of taped conversations with neonatologists to mothers.</b><br><br>The initial conversation and                                                                                                                                                                                                                                                                                                                                                                                                                                                                     | <i>Satisfaction with conversations held with the neonatologist</i><br><br><i>Satisfaction with the</i>                                                      | During admission period and post discharge<br><br>- At 10 days                                                                                                                                                                                                                                                                                                                                            | <i>Individual questions and a satisfaction scale</i><br><br><b>Validation:</b> No content validity or reliability                                                                                                                                                                                                                                                                                                                                                                                                                                                                                                                                                                                                                                                                                                                                                                                                    | No differences were found between the two groups in satisfaction with conversations.<br><br><b>Mothers of babies with a poor outcome in the tape group were, however, significantly</b>                                                                                                                                                                                                                                                                                                                                                                                                                                                                                                                                    | No | 1 |

|                                                                                                                                                    |                                           |                          |                                                                    |                                                                                                                                                                                                                                                                      |                                                                                                                                                                                                                                                                                                                                                                                                                                         |                                                                                                                   |                                                                                                                                                                                                                                                                                                                                                              |                                                                                                                                                                                                                                                                                                                                                                                                                                                                                                                                |                                                                                                                                                                                                                                                                                                                                                                                                                                                                                                                                                                                         |    |   |
|----------------------------------------------------------------------------------------------------------------------------------------------------|-------------------------------------------|--------------------------|--------------------------------------------------------------------|----------------------------------------------------------------------------------------------------------------------------------------------------------------------------------------------------------------------------------------------------------------------|-----------------------------------------------------------------------------------------------------------------------------------------------------------------------------------------------------------------------------------------------------------------------------------------------------------------------------------------------------------------------------------------------------------------------------------------|-------------------------------------------------------------------------------------------------------------------|--------------------------------------------------------------------------------------------------------------------------------------------------------------------------------------------------------------------------------------------------------------------------------------------------------------------------------------------------------------|--------------------------------------------------------------------------------------------------------------------------------------------------------------------------------------------------------------------------------------------------------------------------------------------------------------------------------------------------------------------------------------------------------------------------------------------------------------------------------------------------------------------------------|-----------------------------------------------------------------------------------------------------------------------------------------------------------------------------------------------------------------------------------------------------------------------------------------------------------------------------------------------------------------------------------------------------------------------------------------------------------------------------------------------------------------------------------------------------------------------------------------|----|---|
| 1<br>2<br>3<br>4<br>5<br>6<br>7<br>8<br>9<br>10<br>11<br>12<br>13<br>14<br>15<br>16                                                                |                                           |                          |                                                                    | subsequent conversations of significance with a neonatologist were taped and analysed (for both groups). Mothers received a tape of each of the conversations and a tape recorder.<br><br><u>Control:</u> Usual care. Mothers were not given the tape or a recorder. | tape                                                                                                                                                                                                                                                                                                                                                                                                                                    | - At 4 months<br><br>- At 12 months<br><br>No pre-intervention parent satisfaction data available for comparison. | testing reported.<br><br><u>Number of questions:</u> not stated.<br><br>Likert scale (1-5 most satisfied)<br><br>Questions related to: Satisfaction with amount and quality of information presented, doctors' communication skills, patient's participation in the conversation.<br><br>A satisfaction scale was used to assess: Satisfaction with the tape | <b>more satisfied with the conversations:</b><br><br><b>Satisfaction Intervention Control</b><br><b>Mean</b> 115 (104-123.2) 100.5 (94.1-109.4)<br><b>(95%CI)</b><br><br><b>p-value</b> 0.0051<br><br>Most (71-92%) of the mothers given the tapes stated that they helped their understanding, reminded them of what had been said, and helped their family to understand and recall information.                                                                                                                             |                                                                                                                                                                                                                                                                                                                                                                                                                                                                                                                                                                                         |    |   |
| 17<br>18<br>19<br>20<br>21<br>22<br>23<br>24<br>25<br>26<br>27<br>28<br>29<br>30<br>31<br>32<br>33<br>34<br>35                                     | 9. Mitchell-DiCenso et al. (1996), Canada | Mothers and fathers/ 482 | Mean (SD)<br><br>Intervention: 35.1 (4.5)<br><br>Control: 35 (4.3) | Randomised, Controlled Trial                                                                                                                                                                                                                                         | <b>Intervention: Clinical Nurse Specialist/ neonatal practitioner team (CNS/NP) care.</b><br><br>Infants of intervention parents were assigned to be cared for by the Clinical nurse specialist/neonatal practitioner CNS/NP team during the day and by paediatric residents during the night.<br><br><u>Control:</u> Paediatric residents cared for infants of control parents around the clock. Neonatologists supervised both teams. | Parent satisfaction with care                                                                                     | During admission period and post discharge (twice)<br><br>- On 5 <sup>th</sup> day after admission (full questionnaire administered)<br><br>- After discharge over the phone (administered only the questions related to satisfaction with discharge process)<br><br>No pre-intervention parent satisfaction data available for comparison.                  | <i>Satisfaction questionnaire (Validated)</i><br><br>The study team developed and used the validated <i>Neonatal Index of Parent Satisfaction (NIPS)</i> questionnaire <sup>16</sup> .<br><br><u>Number of questions:</u> not stated.<br><br>NIPS score range (27-189); higher scores indicating greater satisfaction with care.                                                                                                                                                                                               | <b>No statistically significant difference between groups.</b><br><br><b>Intervention Control p-value</b><br><b>NIPS Mean</b> 140 139 0.67<br><b>Difference in means</b> 1.0, CI (-3.6-5.6)                                                                                                                                                                                                                                                                                                                                                                                             | No | 2 |
| 36<br>37<br>38<br>39<br>40<br>41<br>42<br>43<br>44<br>45<br>46<br>47<br>48<br>49<br>50<br>51<br>52<br>53<br>54<br>55<br>56<br>57<br>58<br>59<br>60 | 10. Broyles et al. (1992), USA            | Mothers /25              | Mean (SD)<br><br>Intervention: 33.4 (4)<br><br>Flexible: 34 (4)    | Randomised Controlled Trial                                                                                                                                                                                                                                          | <b>Intervention: Detailed consent.</b><br><br>Mothers were given information about mechanical ventilation. Detailed risk/benefit disclosure was provided both verbally and in writing.<br><br><u>Control:</u> Mothers were given a brief verbal description about mechanical ventilation supplemented with detailed verbal and written disclosure if desired by them (flexible consent).                                                | Maternal satisfaction with the information provided about mechanical ventilation                                  | During babies' admission (once)<br><br>- 24-48 hours after the intervention<br><br>No pre-intervention parent satisfaction data available for comparison.                                                                                                                                                                                                    | <i>An interview</i> evaluating maternal satisfaction with the information provided about mechanical ventilation.<br><br><u>Validation:</u> A psychiatrist with a special interest in interviewing techniques was consulted in designing and standardising this assessment.<br><br>A research nurse conducted the interview, "checking" each mother against one option regarding:<br><br>- Amount of information: Right amount-Too much-Too little<br><br>- Information made coping: More Difficult-Easier-No effect-Uncertain. | This study is measuring and comparing satisfaction with two different interventions (detailed vs flexible consent process), neither of which formally represent the usual routine care for all babies (no control).<br><br><b>Small numbers. No data indicating statistical analysis conducted or evidence of statistically significant results.</b><br><br><b>Detailed consent Flexible consent</b><br><b>Right amount</b> 75% mothers 100% mothers<br><b>of information</b><br><br><b>Too little</b> 25% mothers<br><br><b>Information made coping easier</b> 67% mothers 69% mothers | No | 3 |

## Non-Randomised controlled trials (Non-RCT) by publication year

| Author (Date), Country                    | Parents' gender/ Total sample Size | Infants' Gestational age (GA) in weeks                         | Study design                                                                                                                                      | Intervention                                                                                                                                                                                                                                                                                                                                                                                                                                                                                                                                                                                      | Outcome measures                                                                                                                                                                 | Timing of measurement                                                                                                                                                                                                        | Method of measurement                                                                                                                                                                                                                                                                                                                                                                                                                                                                                                                                         | Outcome                                                                                                                                                                                                                                                                                                                                                                                                                                                                                                                                                                                                                                                                                                                              | Was the intervention co-designed with parents | Improved parent satisfaction? |         |         |                                           |              |             |       |                                 |              |              |       |    |   |
|-------------------------------------------|------------------------------------|----------------------------------------------------------------|---------------------------------------------------------------------------------------------------------------------------------------------------|---------------------------------------------------------------------------------------------------------------------------------------------------------------------------------------------------------------------------------------------------------------------------------------------------------------------------------------------------------------------------------------------------------------------------------------------------------------------------------------------------------------------------------------------------------------------------------------------------|----------------------------------------------------------------------------------------------------------------------------------------------------------------------------------|------------------------------------------------------------------------------------------------------------------------------------------------------------------------------------------------------------------------------|---------------------------------------------------------------------------------------------------------------------------------------------------------------------------------------------------------------------------------------------------------------------------------------------------------------------------------------------------------------------------------------------------------------------------------------------------------------------------------------------------------------------------------------------------------------|--------------------------------------------------------------------------------------------------------------------------------------------------------------------------------------------------------------------------------------------------------------------------------------------------------------------------------------------------------------------------------------------------------------------------------------------------------------------------------------------------------------------------------------------------------------------------------------------------------------------------------------------------------------------------------------------------------------------------------------|-----------------------------------------------|-------------------------------|---------|---------|-------------------------------------------|--------------|-------------|-------|---------------------------------|--------------|--------------|-------|----|---|
| 1. De Bernardo et al (2017), Italy        | Mothers and Fathers /96            | Mean (SD)<br>Control: 34.2 (5.25)<br>Intervention: 32.7 (5.25) | Non-randomized, prospective cohort pilot study<br><br><i>Unit level effect:</i><br>Two different time periods                                     | <b>Intervention: FCC (Family-Centered Care).</b><br><br>Parents had access to NICU for 8 hours a day. The NICU was widened and paediatric nurses taught parents procedures and practices for 10 days. Parents could observe clinical bedside rounds, hold meetings with the physicians and use the rooms and kitchen.<br><br><b>Control:</b> Parents were permitted to visit their baby in NICU for 1 hour a day.                                                                                                                                                                                 | <i>Parent satisfaction relating to 3 specific domains:</i><br><br>1. Knowledge and Understanding<br><br>2. Communication and Collaboration<br><br>3. Privacy and confidentiality | During babies' admission (once)<br><br>- At discharge (pre-FCC cohort and post-FCC cohort)<br><br>No pre-intervention parent satisfaction data available for comparison (different parent groups pre and post intervention). | <i>Satisfaction questionnaire.</i><br><br><b>Validation:</b> The authors state the survey "was designed and validated by Abdel-Latif et al <sup>22</sup> ". No content validity or reliability testing reported in the original paper.<br><br>9 questions<br><br>3 questions: Related to adequate and timely information about the baby's condition.<br><br>3 questions: Related to communication and collaboration with the healthcare team.<br><br>3 questions: Related to respect of patient privacy.<br><br>Likert (1 strongly disagree-5 strongly agree) | <b>7/9 individual statements in the parent satisfaction questionnaire scored higher in the FCC compared to the NFCC (statistically significant difference).</b><br><br>Example statement:<br>"I have received adequate information about my baby's condition and management."<br><br><table border="1"> <thead> <tr> <th></th> <th>Intervention</th> <th>Control</th> <th>p-value</th> </tr> </thead> <tbody> <tr> <td>Median score</td> <td>5 (3.45-5)</td> <td>4 (3-5)</td> <td>&lt;0.05</td> </tr> </tbody> </table>                                                                                                                                                                                                              |                                               | Intervention                  | Control | p-value | Median score                              | 5 (3.45-5)   | 4 (3-5)     | <0.05 | No                              | 1            |              |       |    |   |
|                                           | Intervention                       | Control                                                        | p-value                                                                                                                                           |                                                                                                                                                                                                                                                                                                                                                                                                                                                                                                                                                                                                   |                                                                                                                                                                                  |                                                                                                                                                                                                                              |                                                                                                                                                                                                                                                                                                                                                                                                                                                                                                                                                               |                                                                                                                                                                                                                                                                                                                                                                                                                                                                                                                                                                                                                                                                                                                                      |                                               |                               |         |         |                                           |              |             |       |                                 |              |              |       |    |   |
| Median score                              | 5 (3.45-5)                         | 4 (3-5)                                                        | <0.05                                                                                                                                             |                                                                                                                                                                                                                                                                                                                                                                                                                                                                                                                                                                                                   |                                                                                                                                                                                  |                                                                                                                                                                                                                              |                                                                                                                                                                                                                                                                                                                                                                                                                                                                                                                                                               |                                                                                                                                                                                                                                                                                                                                                                                                                                                                                                                                                                                                                                                                                                                                      |                                               |                               |         |         |                                           |              |             |       |                                 |              |              |       |    |   |
| 2. Kadivar et al. (2017), Iran            | Mothers /68                        | <=30 - 36                                                      | Non-randomised, Convenience sampling.<br><br><i>Group level effect:</i><br>Intervention/control groups.<br><br>Pre and post-intervention testing. | <b>Intervention: Internet-based education.</b><br><br>Mothers were given a unique ID and password to use an educational website set up by the research team (files and clips). Mothers could visit the website from 5:00-6:00 pm for 10 days. They were also allowed to use the website outside of the above hours and to report the duration of using the website to the researcher. The mothers had to use the website at least 3 times during 10 days, each time for at least 30 min.<br><br><b>Control:</b> Mothers in the control group received the routine education provided in the NICU. | <i>Maternal satisfaction</i>                                                                                                                                                     | During babies' admission (twice)<br><br>- Day 1 of intervention<br><br>- Day 10 of intervention                                                                                                                              | <i>Satisfaction questionnaire (Validated)</i><br><br>The "What Being The Parent of a Baby is Like-Revised" Questionnaire (WBPL- Revised) was used. The original English version by Pridham and Chang <sup>23</sup> was translated to Persian.<br><br>11 questions<br><br>Total satisfaction score range (11-99)                                                                                                                                                                                                                                               | There was a significant difference in the mean score of satisfaction between cases and controls while the mean score of satisfaction increased in both groups.<br><br><b>Comparison of the mean score between the two groups showed that the level of satisfaction was significantly higher in the case group versus the control group.</b><br><br><table border="1"> <thead> <tr> <th></th> <th>Intervention</th> <th>Control</th> <th>p-value</th> </tr> </thead> <tbody> <tr> <td>Mean(SD) Satisfaction before intervention</td> <td>81.62(13.50)</td> <td>85.71(9.46)</td> <td>0.993</td> </tr> <tr> <td>Satisfaction after intervention</td> <td>93.88 (5.38)</td> <td>90.12 (7.78)</td> <td>0.024</td> </tr> </tbody> </table> |                                               | Intervention                  | Control | p-value | Mean(SD) Satisfaction before intervention | 81.62(13.50) | 85.71(9.46) | 0.993 | Satisfaction after intervention | 93.88 (5.38) | 90.12 (7.78) | 0.024 | No | 1 |
|                                           | Intervention                       | Control                                                        | p-value                                                                                                                                           |                                                                                                                                                                                                                                                                                                                                                                                                                                                                                                                                                                                                   |                                                                                                                                                                                  |                                                                                                                                                                                                                              |                                                                                                                                                                                                                                                                                                                                                                                                                                                                                                                                                               |                                                                                                                                                                                                                                                                                                                                                                                                                                                                                                                                                                                                                                                                                                                                      |                                               |                               |         |         |                                           |              |             |       |                                 |              |              |       |    |   |
| Mean(SD) Satisfaction before intervention | 81.62(13.50)                       | 85.71(9.46)                                                    | 0.993                                                                                                                                             |                                                                                                                                                                                                                                                                                                                                                                                                                                                                                                                                                                                                   |                                                                                                                                                                                  |                                                                                                                                                                                                                              |                                                                                                                                                                                                                                                                                                                                                                                                                                                                                                                                                               |                                                                                                                                                                                                                                                                                                                                                                                                                                                                                                                                                                                                                                                                                                                                      |                                               |                               |         |         |                                           |              |             |       |                                 |              |              |       |    |   |
| Satisfaction after intervention           | 93.88 (5.38)                       | 90.12 (7.78)                                                   | 0.024                                                                                                                                             |                                                                                                                                                                                                                                                                                                                                                                                                                                                                                                                                                                                                   |                                                                                                                                                                                  |                                                                                                                                                                                                                              |                                                                                                                                                                                                                                                                                                                                                                                                                                                                                                                                                               |                                                                                                                                                                                                                                                                                                                                                                                                                                                                                                                                                                                                                                                                                                                                      |                                               |                               |         |         |                                           |              |             |       |                                 |              |              |       |    |   |

| 3. Kadivar et al. (20), Iran    | Mothers /70                                                | Mean (SD)<br>Control 31.6 (2.4)<br>Intervention 32.9 (3.1) | Non-randomised, Convenience sampling.<br><br><i>Unit level effect:</i><br>Two different time periods                                               | <b>Intervention: Narrative writing.</b><br><br>Mothers did narrative writing at least 3 times until the 10th day of admission.<br><br><b>Control:</b> Mothers in the control group received the routine NICU treatment and care.                                                                                                                                                                                                                                                                                                                                                                                                                                                                                                                                                                                            | <i>Mothers' satisfaction with medical care provided by physicians, medical students, and nurses during neonatal admission to the NICU</i>                                                        | During babies' admission (twice)<br><br>- Day 3 of intervention<br><br>- Day 10 of intervention                                                                                                               | <i>Satisfaction questionnaire (Validated)</i><br><br>The NIPS questionnaire by Mitchell et al <sup>16</sup> was used and translated to Persian.<br><br>24 questions (Likert scale)<br><br>Likert (1 always or not satisfied-7 never or completely satisfied). A higher score indicates more satisfaction.                                                                                                                                                                                                                                          | <b>The satisfaction level of the mothers in the intervention group increased significantly during the study.</b><br><br>The results of independent t test showed a significant difference in the satisfaction changes of the mothers on the 3rd and 10th day of NICU admission between intervention and control groups, indicating the effectiveness of narrative writing.<br><br>The results of paired t-test also showed a significant difference in the mean satisfaction level of the mothers between the 3rd and the 10th day in the intervention group.<br><br><table border="1"> <thead> <tr> <th></th> <th>Intervention</th> <th>Control</th> <th>p-value</th> </tr> </thead> <tbody> <tr> <td><b>Mean(SD)</b></td> <td></td> <td></td> <td></td> </tr> <tr> <td><b>Satisfaction</b></td> <td>137 (15.2)</td> <td>102.3 (25.6)</td> <td>0.001</td> </tr> </tbody> </table><br><b>after intervention</b>                                                                                                                           |    | Intervention | Control | p-value | <b>Mean(SD)</b>  |           |           |      | <b>Satisfaction</b> | 137 (15.2) | 102.3 (25.6) | 0.001 | No | 1 |
|---------------------------------|------------------------------------------------------------|------------------------------------------------------------|----------------------------------------------------------------------------------------------------------------------------------------------------|-----------------------------------------------------------------------------------------------------------------------------------------------------------------------------------------------------------------------------------------------------------------------------------------------------------------------------------------------------------------------------------------------------------------------------------------------------------------------------------------------------------------------------------------------------------------------------------------------------------------------------------------------------------------------------------------------------------------------------------------------------------------------------------------------------------------------------|--------------------------------------------------------------------------------------------------------------------------------------------------------------------------------------------------|---------------------------------------------------------------------------------------------------------------------------------------------------------------------------------------------------------------|----------------------------------------------------------------------------------------------------------------------------------------------------------------------------------------------------------------------------------------------------------------------------------------------------------------------------------------------------------------------------------------------------------------------------------------------------------------------------------------------------------------------------------------------------|-------------------------------------------------------------------------------------------------------------------------------------------------------------------------------------------------------------------------------------------------------------------------------------------------------------------------------------------------------------------------------------------------------------------------------------------------------------------------------------------------------------------------------------------------------------------------------------------------------------------------------------------------------------------------------------------------------------------------------------------------------------------------------------------------------------------------------------------------------------------------------------------------------------------------------------------------------------------------------------------------------------------------------------------|----|--------------|---------|---------|------------------|-----------|-----------|------|---------------------|------------|--------------|-------|----|---|
|                                 | Intervention                                               | Control                                                    | p-value                                                                                                                                            |                                                                                                                                                                                                                                                                                                                                                                                                                                                                                                                                                                                                                                                                                                                                                                                                                             |                                                                                                                                                                                                  |                                                                                                                                                                                                               |                                                                                                                                                                                                                                                                                                                                                                                                                                                                                                                                                    |                                                                                                                                                                                                                                                                                                                                                                                                                                                                                                                                                                                                                                                                                                                                                                                                                                                                                                                                                                                                                                           |    |              |         |         |                  |           |           |      |                     |            |              |       |    |   |
| <b>Mean(SD)</b>                 |                                                            |                                                            |                                                                                                                                                    |                                                                                                                                                                                                                                                                                                                                                                                                                                                                                                                                                                                                                                                                                                                                                                                                                             |                                                                                                                                                                                                  |                                                                                                                                                                                                               |                                                                                                                                                                                                                                                                                                                                                                                                                                                                                                                                                    |                                                                                                                                                                                                                                                                                                                                                                                                                                                                                                                                                                                                                                                                                                                                                                                                                                                                                                                                                                                                                                           |    |              |         |         |                  |           |           |      |                     |            |              |       |    |   |
| <b>Satisfaction</b>             | 137 (15.2)                                                 | 102.3 (25.6)                                               | 0.001                                                                                                                                              |                                                                                                                                                                                                                                                                                                                                                                                                                                                                                                                                                                                                                                                                                                                                                                                                                             |                                                                                                                                                                                                  |                                                                                                                                                                                                               |                                                                                                                                                                                                                                                                                                                                                                                                                                                                                                                                                    |                                                                                                                                                                                                                                                                                                                                                                                                                                                                                                                                                                                                                                                                                                                                                                                                                                                                                                                                                                                                                                           |    |              |         |         |                  |           |           |      |                     |            |              |       |    |   |
| 4. Garingo et al. (2016), USA   | Not stated /9                                              | 23-39                                                      | Non-randomised, Convenience sampling.<br><br><i>Group level effect:</i><br>Intervention/control groups<br><br>Post-intervention group testing only | <b>Intervention: Tele-rounding.</b><br><br>Infants of intervention parents were cared for by an OFFSN (off site neonatologist) who was present in the NICU only via A remote-controlled robot. The OFFSN clinically assessed infants via the robot's integrated high-sensitivity, electronic stethoscope, with assistance from the nursing staff. During routine working hours the OFFSN was called to discuss new information or changes in the patients' status. Emergencies and out of hours work were covered by an ONSN (on site neonatologist).<br><br><b>Control:</b> Infants of control parents received ONSN care. The attending neonatologist made daily patient rounds with the NICU team. After patient rounds, the NICU staff, under the supervision of the attending neonatologist implemented the care plan. | <i>Satisfaction with telemedicine</i>                                                                                                                                                            | During babies' admission (once)<br><br>- At the time of discharge<br><br>No pre-intervention parent satisfaction data available for comparison.                                                               | <i>Satisfaction questionnaire</i><br><br><b>Validation:</b> No content validity or reliability testing reported.<br><br><b>Number of questions:</b> not stated.<br><br>Likert (1 excellent-5 very poor).                                                                                                                                                                                                                                                                                                                                           | <b>Only the intervention group was assessed and only post-intervention.</b><br><br>The authors reported that the parents surveyed were "satisfied with their experience. 100% responded that they felt comfortable talking to the OFFSN on the mobile robot and would allow their infant or themselves to be cared for by a physician via telemedicine in the future."                                                                                                                                                                                                                                                                                                                                                                                                                                                                                                                                                                                                                                                                    | No | 4            |         |         |                  |           |           |      |                     |            |              |       |    |   |
| 5. Globus et al. (2016), Israel | Mothers and fathers /Number of total surveys returned: 178 | ~40% in each group <32                                     | Non-randomised, Convenience sampling.<br><br><i>Unit level effect:</i><br>Two different time periods                                               | <b>Intervention: SMSi- Short Message Services Implementation.</b><br><br>Parents were updated daily regarding the health status of their infant via SMS (short-message-services) from the Electronic Patient Record. All SMS messages were sent at 09:00am, including one-sentence prefaces and conclusions with updated information(e.g. location of the infant's crib and current weight). Information regarding acute events or deterioration of the infant's medical condition was not included in the SMS, but was delivered personally to the parents in real time.<br><br><b>Control:</b> Routine care pre-SMS implementation.                                                                                                                                                                                       | 1. <i>Parent satisfaction related to parent communication with the medical staff</i><br><br>2. <i>Overall parent satisfaction with treatment and staff attitudes throughout hospitalisation.</i> | During babies' admission (once)<br><br>- pre-SMS cohort and post-SMS cohort<br><br>No pre-intervention parent satisfaction data available for comparison (different parent groups pre and post intervention). | <i>Satisfaction questionnaire</i><br><br>The "Parents' attitudes regarding their experience during their infants' hospitalisation in the NICU" questionnaire was used, as well as selected items from a literature review of similar questionnaires, including that by York Hospital <sup>24</sup> and by Conner and Nelson <sup>25</sup> .<br><br><b>Validation:</b> No content validity or reliability testing reported.<br><br>Selected items related to four aspects of the NICU experience. 2 out of 4 directly assessed parent satisfaction: | Overall, in both periods, parents expressed a high degree of satisfaction regarding the medical treatment, the information given and the communication with the medical staff. Overall satisfaction with treatment and with staff attitudes throughout hospitalisation was slightly greater in the post-SMS cohort but did not reach statistical significance.<br><br><b>In the post-SMS cohort, a statistically significant improvement was noted regarding physician availability and patience, parental feelings of comfort in approaching the physicians and nurses, and regularly receiving information regarding the infants' medical status from the physicians.</b><br><br><table border="1"> <thead> <tr> <th></th> <th>Post SMS</th> <th>Pre SMS</th> <th>p-value</th> </tr> </thead> <tbody> <tr> <td><b>Mean (SD)</b></td> <td>4.1 (1.0)</td> <td>3.7 (1.3)</td> <td>0.03</td> </tr> </tbody> </table><br><i>Specific question: "I was pleased with the frequency with which I received information regarding my infant".</i> |    | Post SMS     | Pre SMS | p-value | <b>Mean (SD)</b> | 4.1 (1.0) | 3.7 (1.3) | 0.03 | No                  | 1          |              |       |    |   |
|                                 | Post SMS                                                   | Pre SMS                                                    | p-value                                                                                                                                            |                                                                                                                                                                                                                                                                                                                                                                                                                                                                                                                                                                                                                                                                                                                                                                                                                             |                                                                                                                                                                                                  |                                                                                                                                                                                                               |                                                                                                                                                                                                                                                                                                                                                                                                                                                                                                                                                    |                                                                                                                                                                                                                                                                                                                                                                                                                                                                                                                                                                                                                                                                                                                                                                                                                                                                                                                                                                                                                                           |    |              |         |         |                  |           |           |      |                     |            |              |       |    |   |
| <b>Mean (SD)</b>                | 4.1 (1.0)                                                  | 3.7 (1.3)                                                  | 0.03                                                                                                                                               |                                                                                                                                                                                                                                                                                                                                                                                                                                                                                                                                                                                                                                                                                                                                                                                                                             |                                                                                                                                                                                                  |                                                                                                                                                                                                               |                                                                                                                                                                                                                                                                                                                                                                                                                                                                                                                                                    |                                                                                                                                                                                                                                                                                                                                                                                                                                                                                                                                                                                                                                                                                                                                                                                                                                                                                                                                                                                                                                           |    |              |         |         |                  |           |           |      |                     |            |              |       |    |   |

| 1              |                                |                                                                                       |         |                                                                                                                                                              |                                                                                                                                                                                                                                                                                                                                                                                                                                                                                       |                                                                                        |                                                                                                                                                                                              | 1. Parental assessment of their communication with the medical staff.                                                                                                                                                                                                                                                                                                                                                                                             | Although improvement in all other categories was documented, it did not reach statistical significance.                                                                                                                                                                                                                                             |    |              |         |         |                |      |      |       |    |   |
|----------------|--------------------------------|---------------------------------------------------------------------------------------|---------|--------------------------------------------------------------------------------------------------------------------------------------------------------------|---------------------------------------------------------------------------------------------------------------------------------------------------------------------------------------------------------------------------------------------------------------------------------------------------------------------------------------------------------------------------------------------------------------------------------------------------------------------------------------|----------------------------------------------------------------------------------------|----------------------------------------------------------------------------------------------------------------------------------------------------------------------------------------------|-------------------------------------------------------------------------------------------------------------------------------------------------------------------------------------------------------------------------------------------------------------------------------------------------------------------------------------------------------------------------------------------------------------------------------------------------------------------|-----------------------------------------------------------------------------------------------------------------------------------------------------------------------------------------------------------------------------------------------------------------------------------------------------------------------------------------------------|----|--------------|---------|---------|----------------|------|------|-------|----|---|
| 2              |                                |                                                                                       |         |                                                                                                                                                              |                                                                                                                                                                                                                                                                                                                                                                                                                                                                                       |                                                                                        |                                                                                                                                                                                              | Likert scale (1 do not agree at all-5 strongly agree)                                                                                                                                                                                                                                                                                                                                                                                                             |                                                                                                                                                                                                                                                                                                                                                     |    |              |         |         |                |      |      |       |    |   |
| 3              |                                |                                                                                       |         |                                                                                                                                                              |                                                                                                                                                                                                                                                                                                                                                                                                                                                                                       |                                                                                        |                                                                                                                                                                                              | 2. Overall satisfaction with treatment and staff attitudes throughout hospitalisation.                                                                                                                                                                                                                                                                                                                                                                            |                                                                                                                                                                                                                                                                                                                                                     |    |              |         |         |                |      |      |       |    |   |
| 4              |                                |                                                                                       |         |                                                                                                                                                              |                                                                                                                                                                                                                                                                                                                                                                                                                                                                                       |                                                                                        |                                                                                                                                                                                              | Visual analog scale (scores range 0-10). Higher scores reflect greater satisfaction.                                                                                                                                                                                                                                                                                                                                                                              |                                                                                                                                                                                                                                                                                                                                                     |    |              |         |         |                |      |      |       |    |   |
| 5              |                                |                                                                                       |         |                                                                                                                                                              |                                                                                                                                                                                                                                                                                                                                                                                                                                                                                       |                                                                                        |                                                                                                                                                                                              |                                                                                                                                                                                                                                                                                                                                                                                                                                                                   |                                                                                                                                                                                                                                                                                                                                                     |    |              |         |         |                |      |      |       |    |   |
| 6              |                                |                                                                                       |         |                                                                                                                                                              |                                                                                                                                                                                                                                                                                                                                                                                                                                                                                       |                                                                                        |                                                                                                                                                                                              |                                                                                                                                                                                                                                                                                                                                                                                                                                                                   |                                                                                                                                                                                                                                                                                                                                                     |    |              |         |         |                |      |      |       |    |   |
| 7              |                                |                                                                                       |         |                                                                                                                                                              |                                                                                                                                                                                                                                                                                                                                                                                                                                                                                       |                                                                                        |                                                                                                                                                                                              |                                                                                                                                                                                                                                                                                                                                                                                                                                                                   |                                                                                                                                                                                                                                                                                                                                                     |    |              |         |         |                |      |      |       |    |   |
| 8              |                                |                                                                                       |         |                                                                                                                                                              |                                                                                                                                                                                                                                                                                                                                                                                                                                                                                       |                                                                                        |                                                                                                                                                                                              |                                                                                                                                                                                                                                                                                                                                                                                                                                                                   |                                                                                                                                                                                                                                                                                                                                                     |    |              |         |         |                |      |      |       |    |   |
| 9              |                                |                                                                                       |         |                                                                                                                                                              |                                                                                                                                                                                                                                                                                                                                                                                                                                                                                       |                                                                                        |                                                                                                                                                                                              |                                                                                                                                                                                                                                                                                                                                                                                                                                                                   |                                                                                                                                                                                                                                                                                                                                                     |    |              |         |         |                |      |      |       |    |   |
| 10             |                                |                                                                                       |         |                                                                                                                                                              |                                                                                                                                                                                                                                                                                                                                                                                                                                                                                       |                                                                                        |                                                                                                                                                                                              |                                                                                                                                                                                                                                                                                                                                                                                                                                                                   |                                                                                                                                                                                                                                                                                                                                                     |    |              |         |         |                |      |      |       |    |   |
| 11             |                                |                                                                                       |         |                                                                                                                                                              |                                                                                                                                                                                                                                                                                                                                                                                                                                                                                       |                                                                                        |                                                                                                                                                                                              |                                                                                                                                                                                                                                                                                                                                                                                                                                                                   |                                                                                                                                                                                                                                                                                                                                                     |    |              |         |         |                |      |      |       |    |   |
| 12             |                                |                                                                                       |         |                                                                                                                                                              |                                                                                                                                                                                                                                                                                                                                                                                                                                                                                       |                                                                                        |                                                                                                                                                                                              |                                                                                                                                                                                                                                                                                                                                                                                                                                                                   |                                                                                                                                                                                                                                                                                                                                                     |    |              |         |         |                |      |      |       |    |   |
| 13             |                                |                                                                                       |         |                                                                                                                                                              |                                                                                                                                                                                                                                                                                                                                                                                                                                                                                       |                                                                                        |                                                                                                                                                                                              |                                                                                                                                                                                                                                                                                                                                                                                                                                                                   |                                                                                                                                                                                                                                                                                                                                                     |    |              |         |         |                |      |      |       |    |   |
| 14             |                                |                                                                                       |         |                                                                                                                                                              |                                                                                                                                                                                                                                                                                                                                                                                                                                                                                       |                                                                                        |                                                                                                                                                                                              |                                                                                                                                                                                                                                                                                                                                                                                                                                                                   |                                                                                                                                                                                                                                                                                                                                                     |    |              |         |         |                |      |      |       |    |   |
| 15             | 6.Kazemian et al. (2016), Iran | Mothers /220 newborns (assumed 220 mothers)                                           | >37     | Non-randomised, Convenience sampling.<br><br><i>Group level effect:</i> Intervention/control groups<br><br>Post-intervention testing only                    | <b>Intervention: Rooming-in care.</b><br><br>Mothers and babies were admitted to a different atmosphere to the routine care. This facilitated the mothers and neonates with separate beds along with phototherapy devices and nursing clinical supervision.<br><br><b>Control:</b> The routine care practiced in this neonatal unit supported partial stay of mothers beside their neonates, while sitting on chairs; however, most of the time the mother-infant dyad was separated. | <i>Maternal satisfaction with the neonatal care services and hospital stay comfort</i> | During babies' admission (once)<br><br>-Not stated exactly when<br><br>No pre-intervention parent satisfaction data available for comparison.                                                | <i>Satisfaction questionnaire</i><br><br><b>Validation:</b> No content validity or reliability testing reported.<br><br>The authors state, "a validated self-made questionnaire was employed, which was filled in by some trained midwives." No further information on validation processes, number of questions or name of the questionnaire was provided.<br><br>Likert (5 very satisfied-1 dissatisfied).                                                      | <b>The level of satisfaction was significantly higher in the intervention group, compared to that in the control group.</b><br><br><table border="1"><thead><tr><th></th><th>Intervention</th><th>Control</th><th>p-value</th></tr></thead><tbody><tr><td>Satisfaction %</td><td>26.6</td><td>18.8</td><td>0.027</td></tr></tbody></table>          |    | Intervention | Control | p-value | Satisfaction % | 26.6 | 18.8 | 0.027 | No | 1 |
|                | Intervention                   | Control                                                                               | p-value |                                                                                                                                                              |                                                                                                                                                                                                                                                                                                                                                                                                                                                                                       |                                                                                        |                                                                                                                                                                                              |                                                                                                                                                                                                                                                                                                                                                                                                                                                                   |                                                                                                                                                                                                                                                                                                                                                     |    |              |         |         |                |      |      |       |    |   |
| Satisfaction % | 26.6                           | 18.8                                                                                  | 0.027   |                                                                                                                                                              |                                                                                                                                                                                                                                                                                                                                                                                                                                                                                       |                                                                                        |                                                                                                                                                                                              |                                                                                                                                                                                                                                                                                                                                                                                                                                                                   |                                                                                                                                                                                                                                                                                                                                                     |    |              |         |         |                |      |      |       |    |   |
| 16             |                                |                                                                                       |         |                                                                                                                                                              |                                                                                                                                                                                                                                                                                                                                                                                                                                                                                       |                                                                                        |                                                                                                                                                                                              |                                                                                                                                                                                                                                                                                                                                                                                                                                                                   |                                                                                                                                                                                                                                                                                                                                                     |    |              |         |         |                |      |      |       |    |   |
| 17             |                                |                                                                                       |         |                                                                                                                                                              |                                                                                                                                                                                                                                                                                                                                                                                                                                                                                       |                                                                                        |                                                                                                                                                                                              |                                                                                                                                                                                                                                                                                                                                                                                                                                                                   |                                                                                                                                                                                                                                                                                                                                                     |    |              |         |         |                |      |      |       |    |   |
| 18             |                                |                                                                                       |         |                                                                                                                                                              |                                                                                                                                                                                                                                                                                                                                                                                                                                                                                       |                                                                                        |                                                                                                                                                                                              |                                                                                                                                                                                                                                                                                                                                                                                                                                                                   |                                                                                                                                                                                                                                                                                                                                                     |    |              |         |         |                |      |      |       |    |   |
| 19             |                                |                                                                                       |         |                                                                                                                                                              |                                                                                                                                                                                                                                                                                                                                                                                                                                                                                       |                                                                                        |                                                                                                                                                                                              |                                                                                                                                                                                                                                                                                                                                                                                                                                                                   |                                                                                                                                                                                                                                                                                                                                                     |    |              |         |         |                |      |      |       |    |   |
| 20             |                                |                                                                                       |         |                                                                                                                                                              |                                                                                                                                                                                                                                                                                                                                                                                                                                                                                       |                                                                                        |                                                                                                                                                                                              |                                                                                                                                                                                                                                                                                                                                                                                                                                                                   |                                                                                                                                                                                                                                                                                                                                                     |    |              |         |         |                |      |      |       |    |   |
| 21             |                                |                                                                                       |         |                                                                                                                                                              |                                                                                                                                                                                                                                                                                                                                                                                                                                                                                       |                                                                                        |                                                                                                                                                                                              |                                                                                                                                                                                                                                                                                                                                                                                                                                                                   |                                                                                                                                                                                                                                                                                                                                                     |    |              |         |         |                |      |      |       |    |   |
| 22             |                                |                                                                                       |         |                                                                                                                                                              |                                                                                                                                                                                                                                                                                                                                                                                                                                                                                       |                                                                                        |                                                                                                                                                                                              |                                                                                                                                                                                                                                                                                                                                                                                                                                                                   |                                                                                                                                                                                                                                                                                                                                                     |    |              |         |         |                |      |      |       |    |   |
| 23             |                                |                                                                                       |         |                                                                                                                                                              |                                                                                                                                                                                                                                                                                                                                                                                                                                                                                       |                                                                                        |                                                                                                                                                                                              |                                                                                                                                                                                                                                                                                                                                                                                                                                                                   |                                                                                                                                                                                                                                                                                                                                                     |    |              |         |         |                |      |      |       |    |   |
| 24             |                                |                                                                                       |         |                                                                                                                                                              |                                                                                                                                                                                                                                                                                                                                                                                                                                                                                       |                                                                                        |                                                                                                                                                                                              |                                                                                                                                                                                                                                                                                                                                                                                                                                                                   |                                                                                                                                                                                                                                                                                                                                                     |    |              |         |         |                |      |      |       |    |   |
| 25             |                                |                                                                                       |         |                                                                                                                                                              |                                                                                                                                                                                                                                                                                                                                                                                                                                                                                       |                                                                                        |                                                                                                                                                                                              |                                                                                                                                                                                                                                                                                                                                                                                                                                                                   |                                                                                                                                                                                                                                                                                                                                                     |    |              |         |         |                |      |      |       |    |   |
| 26             |                                |                                                                                       |         |                                                                                                                                                              |                                                                                                                                                                                                                                                                                                                                                                                                                                                                                       |                                                                                        |                                                                                                                                                                                              |                                                                                                                                                                                                                                                                                                                                                                                                                                                                   |                                                                                                                                                                                                                                                                                                                                                     |    |              |         |         |                |      |      |       |    |   |
| 27             |                                |                                                                                       |         |                                                                                                                                                              |                                                                                                                                                                                                                                                                                                                                                                                                                                                                                       |                                                                                        |                                                                                                                                                                                              |                                                                                                                                                                                                                                                                                                                                                                                                                                                                   |                                                                                                                                                                                                                                                                                                                                                     |    |              |         |         |                |      |      |       |    |   |
| 28             |                                |                                                                                       |         |                                                                                                                                                              |                                                                                                                                                                                                                                                                                                                                                                                                                                                                                       |                                                                                        |                                                                                                                                                                                              |                                                                                                                                                                                                                                                                                                                                                                                                                                                                   |                                                                                                                                                                                                                                                                                                                                                     |    |              |         |         |                |      |      |       |    |   |
| 29             |                                |                                                                                       |         |                                                                                                                                                              |                                                                                                                                                                                                                                                                                                                                                                                                                                                                                       |                                                                                        |                                                                                                                                                                                              |                                                                                                                                                                                                                                                                                                                                                                                                                                                                   |                                                                                                                                                                                                                                                                                                                                                     |    |              |         |         |                |      |      |       |    |   |
| 30             |                                |                                                                                       |         |                                                                                                                                                              |                                                                                                                                                                                                                                                                                                                                                                                                                                                                                       |                                                                                        |                                                                                                                                                                                              |                                                                                                                                                                                                                                                                                                                                                                                                                                                                   |                                                                                                                                                                                                                                                                                                                                                     |    |              |         |         |                |      |      |       |    |   |
| 31             |                                |                                                                                       |         |                                                                                                                                                              |                                                                                                                                                                                                                                                                                                                                                                                                                                                                                       |                                                                                        |                                                                                                                                                                                              |                                                                                                                                                                                                                                                                                                                                                                                                                                                                   |                                                                                                                                                                                                                                                                                                                                                     |    |              |         |         |                |      |      |       |    |   |
| 32             |                                |                                                                                       |         |                                                                                                                                                              |                                                                                                                                                                                                                                                                                                                                                                                                                                                                                       |                                                                                        |                                                                                                                                                                                              |                                                                                                                                                                                                                                                                                                                                                                                                                                                                   |                                                                                                                                                                                                                                                                                                                                                     |    |              |         |         |                |      |      |       |    |   |
| 33             | 7. Petteys et al. (2015), USA  | Not stated/ 10 parents included in sample analysis for parent satisfaction assessment | 24-36+  | A prospective cohort design.<br><br>A feasibility study.<br><br><i>Group level effect:</i> Intervention/control groups<br><br>Post-intervention testing only | <b>Intervention: PC (Palliative care).</b><br><br>PC nurses provided important continuity of care for NICU infants clinically requiring PC and at least weekly verbal support of parents. The PC service also coordinated family conferences, provided or requested orders to improve infant symptom management and comfort, and addressed parental coping and self-care.<br><br><b>Control:</b> Usual clinical care for infants not requiring PC.                                    | <i>Overall satisfaction with care received</i>                                         | During babies' admission (once)<br><br>- At discharge (or study closure for infants who remained hospitalised)<br><br>No pre-intervention parent satisfaction data available for comparison. | <i>Satisfaction questionnaire</i><br><br>A researcher-created questionnaire based on extensive current literature review.<br><br><b>Validation:</b> Partially reported. Authors stated content validity testing took place; no information on reliability testing provided.<br><br>1 question<br><br>Likert (1 extremely dissatisfied-4 to extremely satisfied).<br><br>Optional free text (description of specific experiences impacting satisfaction with care) | <b>Parent satisfaction response numbers were small (n= 10), thus statistical comparison of parental satisfaction between cohorts was not possible.</b><br><br>However, 100% of responding PC parents (n= 2) reported being "extremely satisfied" with care, whereas only 50% of responding usual care parents (n= 4) reported extreme satisfaction. | No | 3            |         |         |                |      |      |       |    |   |
| 34             |                                |                                                                                       |         |                                                                                                                                                              |                                                                                                                                                                                                                                                                                                                                                                                                                                                                                       |                                                                                        |                                                                                                                                                                                              |                                                                                                                                                                                                                                                                                                                                                                                                                                                                   |                                                                                                                                                                                                                                                                                                                                                     |    |              |         |         |                |      |      |       |    |   |
| 35             |                                |                                                                                       |         |                                                                                                                                                              |                                                                                                                                                                                                                                                                                                                                                                                                                                                                                       |                                                                                        |                                                                                                                                                                                              |                                                                                                                                                                                                                                                                                                                                                                                                                                                                   |                                                                                                                                                                                                                                                                                                                                                     |    |              |         |         |                |      |      |       |    |   |
| 36             |                                |                                                                                       |         |                                                                                                                                                              |                                                                                                                                                                                                                                                                                                                                                                                                                                                                                       |                                                                                        |                                                                                                                                                                                              |                                                                                                                                                                                                                                                                                                                                                                                                                                                                   |                                                                                                                                                                                                                                                                                                                                                     |    |              |         |         |                |      |      |       |    |   |
| 37             |                                |                                                                                       |         |                                                                                                                                                              |                                                                                                                                                                                                                                                                                                                                                                                                                                                                                       |                                                                                        |                                                                                                                                                                                              |                                                                                                                                                                                                                                                                                                                                                                                                                                                                   |                                                                                                                                                                                                                                                                                                                                                     |    |              |         |         |                |      |      |       |    |   |
| 38             |                                |                                                                                       |         |                                                                                                                                                              |                                                                                                                                                                                                                                                                                                                                                                                                                                                                                       |                                                                                        |                                                                                                                                                                                              |                                                                                                                                                                                                                                                                                                                                                                                                                                                                   |                                                                                                                                                                                                                                                                                                                                                     |    |              |         |         |                |      |      |       |    |   |
| 39             |                                |                                                                                       |         |                                                                                                                                                              |                                                                                                                                                                                                                                                                                                                                                                                                                                                                                       |                                                                                        |                                                                                                                                                                                              |                                                                                                                                                                                                                                                                                                                                                                                                                                                                   |                                                                                                                                                                                                                                                                                                                                                     |    |              |         |         |                |      |      |       |    |   |
| 40             |                                |                                                                                       |         |                                                                                                                                                              |                                                                                                                                                                                                                                                                                                                                                                                                                                                                                       |                                                                                        |                                                                                                                                                                                              |                                                                                                                                                                                                                                                                                                                                                                                                                                                                   |                                                                                                                                                                                                                                                                                                                                                     |    |              |         |         |                |      |      |       |    |   |
| 41             |                                |                                                                                       |         |                                                                                                                                                              |                                                                                                                                                                                                                                                                                                                                                                                                                                                                                       |                                                                                        |                                                                                                                                                                                              |                                                                                                                                                                                                                                                                                                                                                                                                                                                                   |                                                                                                                                                                                                                                                                                                                                                     |    |              |         |         |                |      |      |       |    |   |
| 42             |                                |                                                                                       |         |                                                                                                                                                              |                                                                                                                                                                                                                                                                                                                                                                                                                                                                                       |                                                                                        |                                                                                                                                                                                              |                                                                                                                                                                                                                                                                                                                                                                                                                                                                   |                                                                                                                                                                                                                                                                                                                                                     |    |              |         |         |                |      |      |       |    |   |
| 43             |                                |                                                                                       |         |                                                                                                                                                              |                                                                                                                                                                                                                                                                                                                                                                                                                                                                                       |                                                                                        |                                                                                                                                                                                              |                                                                                                                                                                                                                                                                                                                                                                                                                                                                   |                                                                                                                                                                                                                                                                                                                                                     |    |              |         |         |                |      |      |       |    |   |
| 44             |                                |                                                                                       |         |                                                                                                                                                              |                                                                                                                                                                                                                                                                                                                                                                                                                                                                                       |                                                                                        |                                                                                                                                                                                              |                                                                                                                                                                                                                                                                                                                                                                                                                                                                   |                                                                                                                                                                                                                                                                                                                                                     |    |              |         |         |                |      |      |       |    |   |
| 45             |                                |                                                                                       |         |                                                                                                                                                              |                                                                                                                                                                                                                                                                                                                                                                                                                                                                                       |                                                                                        |                                                                                                                                                                                              |                                                                                                                                                                                                                                                                                                                                                                                                                                                                   |                                                                                                                                                                                                                                                                                                                                                     |    |              |         |         |                |      |      |       |    |   |
| 46             |                                |                                                                                       |         |                                                                                                                                                              |                                                                                                                                                                                                                                                                                                                                                                                                                                                                                       |                                                                                        |                                                                                                                                                                                              |                                                                                                                                                                                                                                                                                                                                                                                                                                                                   |                                                                                                                                                                                                                                                                                                                                                     |    |              |         |         |                |      |      |       |    |   |
| 47             |                                |                                                                                       |         |                                                                                                                                                              |                                                                                                                                                                                                                                                                                                                                                                                                                                                                                       |                                                                                        |                                                                                                                                                                                              |                                                                                                                                                                                                                                                                                                                                                                                                                                                                   |                                                                                                                                                                                                                                                                                                                                                     |    |              |         |         |                |      |      |       |    |   |
| 48             |                                |                                                                                       |         |                                                                                                                                                              |                                                                                                                                                                                                                                                                                                                                                                                                                                                                                       |                                                                                        |                                                                                                                                                                                              |                                                                                                                                                                                                                                                                                                                                                                                                                                                                   |                                                                                                                                                                                                                                                                                                                                                     |    |              |         |         |                |      |      |       |    |   |
| 49             |                                |                                                                                       |         |                                                                                                                                                              |                                                                                                                                                                                                                                                                                                                                                                                                                                                                                       |                                                                                        |                                                                                                                                                                                              |                                                                                                                                                                                                                                                                                                                                                                                                                                                                   |                                                                                                                                                                                                                                                                                                                                                     |    |              |         |         |                |      |      |       |    |   |
| 50             |                                |                                                                                       |         |                                                                                                                                                              |                                                                                                                                                                                                                                                                                                                                                                                                                                                                                       |                                                                                        |                                                                                                                                                                                              |                                                                                                                                                                                                                                                                                                                                                                                                                                                                   |                                                                                                                                                                                                                                                                                                                                                     |    |              |         |         |                |      |      |       |    |   |
| 51             |                                |                                                                                       |         |                                                                                                                                                              |                                                                                                                                                                                                                                                                                                                                                                                                                                                                                       |                                                                                        |                                                                                                                                                                                              |                                                                                                                                                                                                                                                                                                                                                                                                                                                                   |                                                                                                                                                                                                                                                                                                                                                     |    |              |         |         |                |      |      |       |    |   |
| 52             |                                |                                                                                       |         |                                                                                                                                                              |                                                                                                                                                                                                                                                                                                                                                                                                                                                                                       |                                                                                        |                                                                                                                                                                                              |                                                                                                                                                                                                                                                                                                                                                                                                                                                                   |                                                                                                                                                                                                                                                                                                                                                     |    |              |         |         |                |      |      |       |    |   |
| 53             |                                |                                                                                       |         |                                                                                                                                                              |                                                                                                                                                                                                                                                                                                                                                                                                                                                                                       |                                                                                        |                                                                                                                                                                                              |                                                                                                                                                                                                                                                                                                                                                                                                                                                                   |                                                                                                                                                                                                                                                                                                                                                     |    |              |         |         |                |      |      |       |    |   |
| 54             |                                |                                                                                       |         |                                                                                                                                                              |                                                                                                                                                                                                                                                                                                                                                                                                                                                                                       |                                                                                        |                                                                                                                                                                                              |                                                                                                                                                                                                                                                                                                                                                                                                                                                                   |                                                                                                                                                                                                                                                                                                                                                     |    |              |         |         |                |      |      |       |    |   |
| 55             |                                |                                                                                       |         |                                                                                                                                                              |                                                                                                                                                                                                                                                                                                                                                                                                                                                                                       |                                                                                        |                                                                                                                                                                                              |                                                                                                                                                                                                                                                                                                                                                                                                                                                                   |                                                                                                                                                                                                                                                                                                                                                     |    |              |         |         |                |      |      |       |    |   |
| 56             |                                |                                                                                       |         |                                                                                                                                                              |                                                                                                                                                                                                                                                                                                                                                                                                                                                                                       |                                                                                        |                                                                                                                                                                                              |                                                                                                                                                                                                                                                                                                                                                                                                                                                                   |                                                                                                                                                                                                                                                                                                                                                     |    |              |         |         |                |      |      |       |    |   |
| 57             |                                |                                                                                       |         |                                                                                                                                                              |                                                                                                                                                                                                                                                                                                                                                                                                                                                                                       |                                                                                        |                                                                                                                                                                                              |                                                                                                                                                                                                                                                                                                                                                                                                                                                                   |                                                                                                                                                                                                                                                                                                                                                     |    |              |         |         |                |      |      |       |    |   |
| 58             |                                |                                                                                       |         |                                                                                                                                                              |                                                                                                                                                                                                                                                                                                                                                                                                                                                                                       |                                                                                        |                                                                                                                                                                                              |                                                                                                                                                                                                                                                                                                                                                                                                                                                                   |                                                                                                                                                                                                                                                                                                                                                     |    |              |         |         |                |      |      |       |    |   |
| 59             |                                |                                                                                       |         |                                                                                                                                                              |                                                                                                                                                                                                                                                                                                                                                                                                                                                                                       |                                                                                        |                                                                                                                                                                                              |                                                                                                                                                                                                                                                                                                                                                                                                                                                                   |                                                                                                                                                                                                                                                                                                                                                     |    |              |         |         |                |      |      |       |    |   |
| 60             |                                |                                                                                       |         |                                                                                                                                                              |                                                                                                                                                                                                                                                                                                                                                                                                                                                                                       |                                                                                        |                                                                                                                                                                                              |                                                                                                                                                                                                                                                                                                                                                                                                                                                                   |                                                                                                                                                                                                                                                                                                                                                     |    |              |         |         |                |      |      |       |    |   |

|                                                                                                    |                                       |                                                                                   |                        |                                                                                                                                                                                                |                                                                                                                                                                                                                                                                                                                                                                                                                                                                                                                                                                                                               |                                                                                    |                                                                                                                                                                                                           |                                                                                                                                                                                                                                                                                                                                                                                  |                                                                                                                                                                                                                                                                                                                                                                                                                                                                                                                                                                                                                          |                                                                                                                                                                                                                             |   |
|----------------------------------------------------------------------------------------------------|---------------------------------------|-----------------------------------------------------------------------------------|------------------------|------------------------------------------------------------------------------------------------------------------------------------------------------------------------------------------------|---------------------------------------------------------------------------------------------------------------------------------------------------------------------------------------------------------------------------------------------------------------------------------------------------------------------------------------------------------------------------------------------------------------------------------------------------------------------------------------------------------------------------------------------------------------------------------------------------------------|------------------------------------------------------------------------------------|-----------------------------------------------------------------------------------------------------------------------------------------------------------------------------------------------------------|----------------------------------------------------------------------------------------------------------------------------------------------------------------------------------------------------------------------------------------------------------------------------------------------------------------------------------------------------------------------------------|--------------------------------------------------------------------------------------------------------------------------------------------------------------------------------------------------------------------------------------------------------------------------------------------------------------------------------------------------------------------------------------------------------------------------------------------------------------------------------------------------------------------------------------------------------------------------------------------------------------------------|-----------------------------------------------------------------------------------------------------------------------------------------------------------------------------------------------------------------------------|---|
| 1<br>2<br>3<br>4<br>5<br>6<br>7<br>8<br>9<br>10<br>11<br>12<br>13<br>14<br>15<br>16<br>17          | 8. Van de Vijver and Evans (2015), UK | Not stated /105                                                                   | Not stated             | Non-randomised, Convenience sampling.<br><br><i>Unit level effect:</i> Three different time periods                                                                                            | <b>Intervention: Baby diary.</b><br><br>Each parent received a communication diary on their infant's admission to the unit. Doctors and nurses wrote in infant status updates and kept an infant interaction log with parents and staff. Parents wrote in memories and questions for staff to address during face-to-face communication.<br><br><b>Control:</b> Routine care, before implementation of the diaries.                                                                                                                                                                                           | <i>Satisfaction with communication from neonatal staff</i>                         | During babies' admission (three times)<br><br>- On the day of babies' discharge at study baseline<br><br>- On the day of babies' discharge at 1 month<br><br>On the day of babies' discharge at 15 months | <i>Satisfaction questionnaire</i><br><br>The study team designed a questionnaire, based on the Department of Health <sup>26</sup> and the National Institute for Health and Care Excellence (NICE) <sup>27</sup> quality standards for specialist neonatal care.<br><br><b>Validation:</b> No content validity or reliability testing reported.<br><br>5 questions ("yes or no") | <b>Small numbers. No data indicating statistical analysis conducted or evidence of statistically significant results.</b><br><br><i>"I was receiving regular communication from staff"</i><br>94% - 1 month post diary cohort<br>93% - 15 months post diary cohort<br>77% - pre diary cohort<br><br><i>"My questions and concerns were being addressed"</i><br>100% - 1 month post diary cohort<br>93% - 15 months post diary cohort<br>91% - pre diary cohort<br><br><i>"I feel more involved in my baby's care"</i><br>92% - 1 month post diary cohort<br>100% - 15 months post diary cohort<br>88% - pre diary cohort | <b>Yes.</b><br><br>The intervention's concept was created by the project leaders following analysis of baseline questionnaire results and implemented after multi-disciplinary input and discussion with staff and parents. | 3 |
| 18<br>19<br>20<br>21<br>22<br>23<br>24<br>25<br>26<br>27<br>28                                     | 9. Voos and Park. (2014), USA         | Not stated / 62                                                                   | Not stated             | Non-randomised, Convenience sampling.<br><br><i>Unit level effect:</i> Two different time periods                                                                                              | <b>Intervention: OU (Open Unit) policy.</b><br><br>Parents were allowed access to their baby 24 hours a day, 7 days a week.<br><br><b>Control:</b> Parents pre-OU implementation received routine care. The unit was closed to parents during nurse change of shift in mornings and evenings.                                                                                                                                                                                                                                                                                                                 | <i>Parent satisfaction with how much time parents get to spend with their baby</i> | After babies were discharged (once)<br><br>- After pre-OU parents were discharged<br><br>- After post-OU parents were discharged                                                                          | <i>Single question (From a validated questionnaire)</i><br><br>The question "Did you get to spend as much time as you wanted with your baby?" was used from the NRC (National Research Corporation) Picker parent survey <sup>28</sup> .<br><br>1 question ("yes or no")                                                                                                         | <b>Small numbers. No data indicating statistical analysis conducted or evidence of statistically significant results.</b><br><br><i>"Did you get to spend as much time as you wanted with your baby?" Yes.</i><br><br>Pre OU 78% (18/23)<br>Post OU 92% (36/39)                                                                                                                                                                                                                                                                                                                                                          | <b>Yes.</b><br><br>The NICU has a multidisciplinary FCC (Family-centered care) committee that also includes parents. The FCC committee conducted this project.                                                              | 3 |
| 29<br>30<br>31<br>32<br>33<br>34<br>35<br>36<br>37<br>38<br>39<br>40<br>41<br>42<br>43<br>44<br>45 | 10. Segre et al. (2013), USA          | Mothers /23                                                                       | Mean (SD) 31.57 (5.30) | For the outcome of parent satisfaction:<br><br>Non-Randomised, Convenience sampling.<br><br><i>Group level effect:</i> Intervention/control groups<br><br>Post-intervention group testing only | <b>Intervention: (LV) Listening visits.</b><br><br>Mothers met with the LV provider for up to six 50-min LV sessions, conducted in a private hospital location, every 2-3 days, within a 1-month frame. The general structure of a visit entailed greeting, debriefing, updating on current issues, working an agenda through listening and problem solving, and providing closure through summary.<br><br><b>Control:</b> Women who did not meet the specific criteria (e.g. minimum score on depression scale) were not invited to join the treatment trial and received routine NICU care/support instead. | <i>Satisfaction with the treatment and the outcome.</i>                            | During babies' admission (once)<br><br>- Not stated exactly when<br><br>No pre-intervention parent satisfaction data available for comparison.                                                            | <i>Satisfaction questionnaire</i><br><br>The Client Satisfaction Questionnaire was used.<br><br><b>Validation:</b> Partially reported. Authors stated reliability testing took place; no information on content validity provided.<br><br>8 questions.<br><br><b>Format of questions:</b> not stated                                                                             | <b>Only the intervention group was assessed and only post-intervention.</b><br><br>The authors reported:<br><br><i>"The majority of women who received LVs were highly satisfied with the intervention".</i><br><br><i>"The average score for the Client Satisfaction Questionnaire was 29.91, comparable to levels of satisfaction reported by clients receiving depression treatment from a mental health professional."</i><br><br><i>"91.3% of our participants rated the quality of help they received as excellent."</i>                                                                                           | <b>No</b>                                                                                                                                                                                                                   | 4 |
| 46<br>47<br>48<br>49<br>50<br>51<br>52<br>53<br>54<br>55<br>56<br>57<br>58<br>59<br>60             | 11. Palma et al. (2012), USA          | Not stated / 26 families returned the survey containing the satisfaction measure) | Not stated             | Non-randomised, Convenience sampling.<br><br><i>Unit level effect:</i> Two different time periods                                                                                              | <b>Intervention: YBDU (Your Baby's Daily Update). A daily parent update letter generated from the Electronic Medical Record (EMR).</b><br><br>Parents were given daily YBDU reports, printed automatically from the EMR. The YBDU included information about an infant's status during the past 24 hours and a hand-written update by the infant's care provider.<br><br><b>Control:</b> Parents received routine care and usual verbal updates (6 months pre- adoption of YBDU).                                                                                                                             | <i>Satisfaction with YBDU</i>                                                      | During babies' admission (once)<br><br>- Not stated exactly when<br><br>No pre-intervention parent satisfaction data available for comparison (different parent groups pre and post intervention).        | <i>Satisfaction questionnaire</i><br><br>A questionnaire including items regarding adoption of and satisfaction with YBDU was used.<br><br><b>Validation:</b> No content validity or reliability testing reported.<br><br><b>Number and format of questions:</b> not stated.                                                                                                     | <b>Only the intervention group was assessed and only post-intervention.</b><br><br>The authors reported:<br><br><i>"When asked to rate the statement "I like receiving Your Baby's Daily Update", 96% of families who used YBDU as an information source responded with the highest rating, "always"."</i>                                                                                                                                                                                                                                                                                                               | <b>No</b>                                                                                                                                                                                                                   | 4 |



| 12. Stevens et al. (2011), USA     | Mothers /147. For the OPBY NICU, 58 surveys were returned. For the SFR NICU, 89 were returned | Mean (SD)<br><br>Control 35 (4)<br><br>Intervention 34 (3)                               | Cohort trial. This research was part of a large prospective evaluation.<br><br><i>Unit level effect:</i> Two different time periods | <b>Intervention: SFR (Single-family room) NICU for neonatal care.</b><br><br>Parents could visit their baby, room-in, do kangaroo care, and breastfeed at any time, in individual rooms containing a bed, desk, closet, telephone, chair and a refrigerator for breast-milk storage.<br><br><b>Control:</b> OPBY (Open-bay) NICU. The traditional open-bay NICU was typical of facilities built before 1980. All neonates, family members, staff, monitors, and equipment were visible for all neonates in each room. Portable partitions were placed around the incubator for breastfeeding and kangaroo care.                                                                | <i>Parent satisfaction with different elements of NICU:</i><br>- Delivery<br>- Environment<br>- Nurses<br>- Physicians<br>- Discharge<br>- Personal<br>- Overall Assessment | After babies were discharged (once)<br><br>- Mailed within 60 days of discharge of parents' infants from the NICU<br><br>No pre-intervention parent satisfaction data available for comparison (different parent groups pre and post intervention). | <i>Satisfaction questionnaire</i><br><br>A questionnaire from Press Ganey Associates <sup>29</sup> was used. Also included were three questions added by the investigators.<br><br><b>Validation:</b> Partially reported. The original questionnaire was validated questionnaire but no content validity or reliability testing was reported regarding the 3 questions added by the study team.<br><br>42 questions in total (7 categories):<br>Delivery, Environment, Nurses, Physicians, Discharge, Personal, Overall Assessment.<br><br>Likert (1 very poor-5 very good). | <b>Statistically significant improvement was found for the survey categories of Environment, Overall and the Total survey.</b><br><br>Estimated numbers from report's figures as numbers not provided):<br><br><table border="1"><thead><tr><th>Median</th><th>SFR</th><th>OPBY</th><th>p-value</th></tr></thead><tbody><tr><td>Environment</td><td>4.7</td><td>3.7</td><td>&lt;0.001</td></tr><tr><td>Overall</td><td>5</td><td>4.8</td><td>0.018</td></tr><tr><td>Total</td><td>4.7</td><td>4.5</td><td>0.045</td></tr></tbody></table><br>16 items composite score for family-centered care:<br>4.4 4.0 0.017 | Median | SFR              | OPBY             | p-value                            | Environment | 4.7        | 3.7                                                                                                                                                                | <0.001   | Overall   | 5        | 4.8 | 0.018 | Total | 4.7 | 4.5 | 0.045 | <b>Yes.</b><br><br>Former NICU parents were involved in all phases of planning for the new SFR NICU. | <b>1</b> |
|------------------------------------|-----------------------------------------------------------------------------------------------|------------------------------------------------------------------------------------------|-------------------------------------------------------------------------------------------------------------------------------------|--------------------------------------------------------------------------------------------------------------------------------------------------------------------------------------------------------------------------------------------------------------------------------------------------------------------------------------------------------------------------------------------------------------------------------------------------------------------------------------------------------------------------------------------------------------------------------------------------------------------------------------------------------------------------------|-----------------------------------------------------------------------------------------------------------------------------------------------------------------------------|-----------------------------------------------------------------------------------------------------------------------------------------------------------------------------------------------------------------------------------------------------|------------------------------------------------------------------------------------------------------------------------------------------------------------------------------------------------------------------------------------------------------------------------------------------------------------------------------------------------------------------------------------------------------------------------------------------------------------------------------------------------------------------------------------------------------------------------------|------------------------------------------------------------------------------------------------------------------------------------------------------------------------------------------------------------------------------------------------------------------------------------------------------------------------------------------------------------------------------------------------------------------------------------------------------------------------------------------------------------------------------------------------------------------------------------------------------------------|--------|------------------|------------------|------------------------------------|-------------|------------|--------------------------------------------------------------------------------------------------------------------------------------------------------------------|----------|-----------|----------|-----|-------|-------|-----|-----|-------|------------------------------------------------------------------------------------------------------|----------|
| Median                             | SFR                                                                                           | OPBY                                                                                     | p-value                                                                                                                             |                                                                                                                                                                                                                                                                                                                                                                                                                                                                                                                                                                                                                                                                                |                                                                                                                                                                             |                                                                                                                                                                                                                                                     |                                                                                                                                                                                                                                                                                                                                                                                                                                                                                                                                                                              |                                                                                                                                                                                                                                                                                                                                                                                                                                                                                                                                                                                                                  |        |                  |                  |                                    |             |            |                                                                                                                                                                    |          |           |          |     |       |       |     |     |       |                                                                                                      |          |
| Environment                        | 4.7                                                                                           | 3.7                                                                                      | <0.001                                                                                                                              |                                                                                                                                                                                                                                                                                                                                                                                                                                                                                                                                                                                                                                                                                |                                                                                                                                                                             |                                                                                                                                                                                                                                                     |                                                                                                                                                                                                                                                                                                                                                                                                                                                                                                                                                                              |                                                                                                                                                                                                                                                                                                                                                                                                                                                                                                                                                                                                                  |        |                  |                  |                                    |             |            |                                                                                                                                                                    |          |           |          |     |       |       |     |     |       |                                                                                                      |          |
| Overall                            | 5                                                                                             | 4.8                                                                                      | 0.018                                                                                                                               |                                                                                                                                                                                                                                                                                                                                                                                                                                                                                                                                                                                                                                                                                |                                                                                                                                                                             |                                                                                                                                                                                                                                                     |                                                                                                                                                                                                                                                                                                                                                                                                                                                                                                                                                                              |                                                                                                                                                                                                                                                                                                                                                                                                                                                                                                                                                                                                                  |        |                  |                  |                                    |             |            |                                                                                                                                                                    |          |           |          |     |       |       |     |     |       |                                                                                                      |          |
| Total                              | 4.7                                                                                           | 4.5                                                                                      | 0.045                                                                                                                               |                                                                                                                                                                                                                                                                                                                                                                                                                                                                                                                                                                                                                                                                                |                                                                                                                                                                             |                                                                                                                                                                                                                                                     |                                                                                                                                                                                                                                                                                                                                                                                                                                                                                                                                                                              |                                                                                                                                                                                                                                                                                                                                                                                                                                                                                                                                                                                                                  |        |                  |                  |                                    |             |            |                                                                                                                                                                    |          |           |          |     |       |       |     |     |       |                                                                                                      |          |
| 13. Voos et al. (2011), USA        | Not stated /28                                                                                | Not stated                                                                               | Non-randomised, Convenience sampling.<br><br><i>Unit level effect:</i> Two different time periods                                   | <b>Intervention: Family-centered rounds (FCRs).</b><br><br>Parents were invited to attend rounds and choose their level of involvement (attend every day, not at all, periodically). Parents received a handout explaining that the team would still be communicating with the parents if the parents were unable to attend FCRs. For confidentiality concerns, Parents were asked to step out of the room while rounds of others' infants took place. The staff augmented FCRs by meeting with parents again after rounds if needed.<br><br><b>Control:</b> Parents received routine care. Prior to implementation of FCR parents were asked to leave the unit during rounds. | <i>Global satisfaction with the NICU experience</i>                                                                                                                         | During babies' admission (twice)<br><br>- Prior to FCR<br><br>- 6 months after starting FCR                                                                                                                                                         | <i>Satisfaction questionnaire (Validated)</i><br><br><i>The NIPS questionnaire</i> <sup>16</sup> .<br><br>24 questions: looking at satisfaction in different areas of the NICU (medical caregivers, communication, tests, and procedures).<br><br>Likert scale (1-7 points).                                                                                                                                                                                                                                                                                                 | <b>A subset of NIPS items related to communication (i.e. being kept informed as to changes in the infant's condition, meeting with physicians, and information about long-term expectations) yielded a significant increase from pre to post FCR scores.</b><br><br><table border="1"><thead><tr><th></th><th>post FCR</th><th>pre FCR</th><th>p-value</th></tr></thead><tbody><tr><td>NIPS score</td><td>5.5</td><td>4.4</td><td>&lt;0.01</td></tr></tbody></table><br>The average score on the NIPS did not change significantly.                                                                              |        | post FCR         | pre FCR          | p-value                            | NIPS score  | 5.5        | 4.4                                                                                                                                                                | <0.01    | <b>No</b> | <b>1</b> |     |       |       |     |     |       |                                                                                                      |          |
|                                    | post FCR                                                                                      | pre FCR                                                                                  | p-value                                                                                                                             |                                                                                                                                                                                                                                                                                                                                                                                                                                                                                                                                                                                                                                                                                |                                                                                                                                                                             |                                                                                                                                                                                                                                                     |                                                                                                                                                                                                                                                                                                                                                                                                                                                                                                                                                                              |                                                                                                                                                                                                                                                                                                                                                                                                                                                                                                                                                                                                                  |        |                  |                  |                                    |             |            |                                                                                                                                                                    |          |           |          |     |       |       |     |     |       |                                                                                                      |          |
| NIPS score                         | 5.5                                                                                           | 4.4                                                                                      | <0.01                                                                                                                               |                                                                                                                                                                                                                                                                                                                                                                                                                                                                                                                                                                                                                                                                                |                                                                                                                                                                             |                                                                                                                                                                                                                                                     |                                                                                                                                                                                                                                                                                                                                                                                                                                                                                                                                                                              |                                                                                                                                                                                                                                                                                                                                                                                                                                                                                                                                                                                                                  |        |                  |                  |                                    |             |            |                                                                                                                                                                    |          |           |          |     |       |       |     |     |       |                                                                                                      |          |
| 14. Weiss et al. (2010), USA       | Mothers /84                                                                                   | Mean (SD)<br><br>Pre-intervention group: 32 (4.4)<br><br>Post-intervention group: 32 (9) | Non-randomised, Convenience sampling<br><br><i>Unit level effect:</i> Two different time periods                                    | <b>Intervention:</b><br><b>An intervention to increase PMP (Principal Medical Providers) availability and communication frequency.</b><br><br>(1) A brief education module for PMPs was introduced, (2) parents received a contact card with PMP names, job descriptions and contact information and (3) a large poster of the faces, names and titles of the PMPs was placed at the parent entrance of the NICU.<br><br><b>Control:</b> Parents received routine care in the pre-intervention cohort, without the above.                                                                                                                                                      | <i>Parent satisfaction with physician and nurse practitioner communication</i>                                                                                              | During babies' admission (twice)<br><br>- Pre-intervention<br><br>- Post-intervention                                                                                                                                                               | <i>Satisfaction Questionnaire (Validated)</i><br><br>A pilot survey written by Press Ganey and the Picker Institute was used and revised based on parent responses <sup>30-33</sup> .<br><br>6 open-ended questions (Quantity of communication)<br><br>6 Likert scale questions (range questions (Availability, understanding, reciprocity, empathy, overall satisfaction)                                                                                                                                                                                                   | <b>Overall satisfaction, based on the ordinal analysis of the five-point Likert scale, was significantly higher after the intervention (P&lt;0.01).</b><br><br><b>Overall satisfaction, dichotomised into a satisfied subgroup and a dissatisfied subgroup for each cohort, was also significantly increased after the intervention.</b><br><br><table border="1"><thead><tr><th></th><th>post-ntervention</th><th>pre-intervention</th></tr></thead><tbody><tr><td>Very satisfied /somewhat satisfied</td><td>97%(32/33)</td><td>74%(37/50)</td></tr></tbody></table><br>p-value <0.01                          |        | post-ntervention | pre-intervention | Very satisfied /somewhat satisfied | 97%(32/33)  | 74%(37/50) | <b>No</b><br><br>Authors stated that only after implementation of the intervention many parents (both satisfied and unsatisfied) gave suggestions for improvement. | <b>1</b> |           |          |     |       |       |     |     |       |                                                                                                      |          |
|                                    | post-ntervention                                                                              | pre-intervention                                                                         |                                                                                                                                     |                                                                                                                                                                                                                                                                                                                                                                                                                                                                                                                                                                                                                                                                                |                                                                                                                                                                             |                                                                                                                                                                                                                                                     |                                                                                                                                                                                                                                                                                                                                                                                                                                                                                                                                                                              |                                                                                                                                                                                                                                                                                                                                                                                                                                                                                                                                                                                                                  |        |                  |                  |                                    |             |            |                                                                                                                                                                    |          |           |          |     |       |       |     |     |       |                                                                                                      |          |
| Very satisfied /somewhat satisfied | 97%(32/33)                                                                                    | 74%(37/50)                                                                               |                                                                                                                                     |                                                                                                                                                                                                                                                                                                                                                                                                                                                                                                                                                                                                                                                                                |                                                                                                                                                                             |                                                                                                                                                                                                                                                     |                                                                                                                                                                                                                                                                                                                                                                                                                                                                                                                                                                              |                                                                                                                                                                                                                                                                                                                                                                                                                                                                                                                                                                                                                  |        |                  |                  |                                    |             |            |                                                                                                                                                                    |          |           |          |     |       |       |     |     |       |                                                                                                      |          |

| 15. Foster et al. (2008), Australia | Mothers and fathers /93<br><br>5 Special Care Nurseries          | Mean (SD)<br><br>Headbox: 36.5 (2.6)<br><br>CPAP: 36 (3)                                      | Non-randomised, Convenience sampling<br><br><i>Group level effect:</i> Intervention 1/ intervention 2 groups<br><br>Post intervention testing only                                      | <b>Intervention 1: Infants received headbox oxygen treatment for respiratory distress.</b><br><br><b>Intervention 2: Infants received continuous oxygen positive airway pressure (CPAP) treatment for respiratory distress.</b>                                                                                                                                                                                                                                                                                                                                                                                                                                                                                                                                                                                                           | <i>Satisfaction with treatment (i.e. headbox oxygen or CPAP)</i>                                                                                                                                                                                                                                         | During babies' admission (once)<br><br>- Within 5 days of the babies' admission<br><br>No pre-intervention parent satisfaction data available for comparison. | <i>Single question</i><br><br><u>Validation:</u> No content validity or reliability testing reported.<br><br>1 likert scale question (1 not at all satisfied-5 extremely satisfied).                                                                                                                                                             | <b>Parents with babies receiving CPAP rated their satisfaction with the baby's treatment statistically significantly higher than the headbox group mean rating.</b><br><br><table border="1"> <thead> <tr> <th></th> <th>Headbox</th> <th>CPAP</th> <th>p-value</th> </tr> </thead> <tbody> <tr> <td>Mean (SD)</td> <td>3.71 (1.31)</td> <td>4.51 (0.79)</td> <td>0.001</td> </tr> </tbody> </table><br>The CPAP group averaged between <i>very and extremely satisfied</i> compared with parents of babies receiving headbox, who averaged between <i>satisfied and very satisfied</i> ratings.                                                                                                                                                                                          |    | Headbox      | CPAP    | p-value | Mean (SD) | 3.71 (1.31) | 4.51 (0.79) | 0.001 | No | 1 |
|-------------------------------------|------------------------------------------------------------------|-----------------------------------------------------------------------------------------------|-----------------------------------------------------------------------------------------------------------------------------------------------------------------------------------------|-------------------------------------------------------------------------------------------------------------------------------------------------------------------------------------------------------------------------------------------------------------------------------------------------------------------------------------------------------------------------------------------------------------------------------------------------------------------------------------------------------------------------------------------------------------------------------------------------------------------------------------------------------------------------------------------------------------------------------------------------------------------------------------------------------------------------------------------|----------------------------------------------------------------------------------------------------------------------------------------------------------------------------------------------------------------------------------------------------------------------------------------------------------|---------------------------------------------------------------------------------------------------------------------------------------------------------------|--------------------------------------------------------------------------------------------------------------------------------------------------------------------------------------------------------------------------------------------------------------------------------------------------------------------------------------------------|-------------------------------------------------------------------------------------------------------------------------------------------------------------------------------------------------------------------------------------------------------------------------------------------------------------------------------------------------------------------------------------------------------------------------------------------------------------------------------------------------------------------------------------------------------------------------------------------------------------------------------------------------------------------------------------------------------------------------------------------------------------------------------------------|----|--------------|---------|---------|-----------|-------------|-------------|-------|----|---|
|                                     | Headbox                                                          | CPAP                                                                                          | p-value                                                                                                                                                                                 |                                                                                                                                                                                                                                                                                                                                                                                                                                                                                                                                                                                                                                                                                                                                                                                                                                           |                                                                                                                                                                                                                                                                                                          |                                                                                                                                                               |                                                                                                                                                                                                                                                                                                                                                  |                                                                                                                                                                                                                                                                                                                                                                                                                                                                                                                                                                                                                                                                                                                                                                                           |    |              |         |         |           |             |             |       |    |   |
| Mean (SD)                           | 3.71 (1.31)                                                      | 4.51 (0.79)                                                                                   | 0.001                                                                                                                                                                                   |                                                                                                                                                                                                                                                                                                                                                                                                                                                                                                                                                                                                                                                                                                                                                                                                                                           |                                                                                                                                                                                                                                                                                                          |                                                                                                                                                               |                                                                                                                                                                                                                                                                                                                                                  |                                                                                                                                                                                                                                                                                                                                                                                                                                                                                                                                                                                                                                                                                                                                                                                           |    |              |         |         |           |             |             |       |    |   |
| 16. Byers et al. (2006), USA        | Only mothers reported /35                                        | Preterm infants<br><br>Mean (SD)<br><br>Control: 28.9 (3.44)<br><br>Intervention: 28.6 (3.37) | For the outcome of parent satisfaction:<br><br>Non-randomised, Convenience sampling<br><br><i>Group level effect:</i> Intervention/control groups<br><br>Post-intervention testing only | <b>Intervention: Infants received individualised, developmentally supportive family-centered care.</b><br><br>Infants received the standard of care within the framework and philosophy of individualised, developmentally supportive family-centered interventions.<br><br><b>Control:</b> Infants received the traditional NICU standard of care.                                                                                                                                                                                                                                                                                                                                                                                                                                                                                       | <i>Parent satisfaction relating to:</i><br>- parental perceptions of staff caring<br>- education received<br>- preparation for the parental role<br>- overall satisfaction with the NICU experience                                                                                                      | During babies' admission (once)<br><br>- On the day before discharge<br><br>No pre-intervention parent satisfaction data available for comparison.            | <i>Satisfaction questionnaire</i><br><br>The NICU's parental satisfaction tool was used.<br><br><u>Validation:</u> Partially reported. Authors stated content validity testing took place, but "because of the disparate nature of the items, survey reliability was not assessed".<br><br>11 questions<br><br>Likert scale (1-5 strongly agree) | <b>Independent t-test analysis of parent satisfaction/perception scores showed no significant difference between groups.</b><br><br>Example statement: "I was satisfied with the car my baby and I received in the NICU"<br><br><table border="1"> <thead> <tr> <th></th> <th>Intervention</th> <th>Control</th> <th>p-value</th> </tr> </thead> <tbody> <tr> <td>Mean (SD)</td> <td>4.94(0.23)</td> <td>4.71(0.47)</td> <td>0.064</td> </tr> </tbody> </table><br>Both groups reported very high satisfaction with their NICU experience (4.4-5.0)                                                                                                                                                                                                                                       |    | Intervention | Control | p-value | Mean (SD) | 4.94(0.23)  | 4.71(0.47)  | 0.064 | No | 2 |
|                                     | Intervention                                                     | Control                                                                                       | p-value                                                                                                                                                                                 |                                                                                                                                                                                                                                                                                                                                                                                                                                                                                                                                                                                                                                                                                                                                                                                                                                           |                                                                                                                                                                                                                                                                                                          |                                                                                                                                                               |                                                                                                                                                                                                                                                                                                                                                  |                                                                                                                                                                                                                                                                                                                                                                                                                                                                                                                                                                                                                                                                                                                                                                                           |    |              |         |         |           |             |             |       |    |   |
| Mean (SD)                           | 4.94(0.23)                                                       | 4.71(0.47)                                                                                    | 0.064                                                                                                                                                                                   |                                                                                                                                                                                                                                                                                                                                                                                                                                                                                                                                                                                                                                                                                                                                                                                                                                           |                                                                                                                                                                                                                                                                                                          |                                                                                                                                                               |                                                                                                                                                                                                                                                                                                                                                  |                                                                                                                                                                                                                                                                                                                                                                                                                                                                                                                                                                                                                                                                                                                                                                                           |    |              |         |         |           |             |             |       |    |   |
| 17. Mills et al. (2006), USA        | Not stated/not stated<br><br>Parents of infants from 6 hospitals | Not stated                                                                                    | Implementation project<br><br>Plan Do Study Act (PDSA) quality improvement testing                                                                                                      | <b>Intervention: 5 potentially better practices (PBPs) in the area of discharge planning.</b><br><br>The project team iteratively implemented 5 PBPs:<br>1. Created an easy-to-use, easy-to-access discharge planning tool kit.<br>2. Restructured communication tools and processes to reflect a "plan for the day, the stay, and the way" to discharge.<br>3. Maximised the impact and use of caregiver educational tools, and updated materials and delivery systems for caregiver education.<br>4. Used various continuous quality improvement tools and processes to ensure parent/caregiver and staff satisfaction.<br>5. Analysed and enhanced interactions with and transfers into the community.<br><br><b>Control:</b> N/A. No discrete control group. PDSA quality improvement methodology was applied to parent participants. | <i>General satisfaction</i><br>- with care<br>- parents' feelings about preparedness for discharge<br>- ability and confidence in feeding<br>- familiarity with their infant<br>- feeling like a parent<br>- participation in care<br>- adequacy of information from staff about medical and care issues | During babies' admission (4 times)<br><br>- Not reported exactly when                                                                                         | <i>Satisfaction questionnaire</i><br><br>The Internet-based parent satisfaction survey "howyourbaby.com" that was developed especially for this NICU population was used.<br><u>Validation:</u> No content validity or reliability testing reported.<br><br><u>Number and format of questions:</u> not stated.                                   | Through multiple rapid-cycle projects, the project's collaborative group made changes within the 5 PBP plans.<br><br><b>Parent satisfaction measures were used to longitudinally monitor the changes made, rather than make direct group comparison. No data indicating statistical analysis conducted or evidence of statistically significant results.</b><br><br>Parent satisfaction survey results (all centers combined) were high across 4 measurement quartiles. No specific interquartile analysis was reported.<br><br>Parent readiness for discharge was high at the beginning and throughout the collaborative. Parents' receiving "just the right amount of information" regarding car seat trials and safe sleep demonstrated some variability throughout the collaborative. | No | 3            |         |         |           |             |             |       |    |   |

| 1<br>2<br>3<br>4<br>5<br>6<br>7<br>8<br>9<br>10<br>11<br>12<br>13<br>14<br>15<br>16<br>17                                                                                                                                                                      | 18. Wielenga et al. (2006), The Netherlands | Mothers and fathers / 46                                                                                                   | Mean (SD)<br><br>Control: 28.5 (26.0–29.9)<br><br>Intervention: 28.3 (25.6–29.9) | Non-randomised, Convenience sampling<br><br><i>Unit level effect:</i><br>Two different time periods                                                                                                                                                                                          | <b>Intervention: The Newborn Individualised Developmental Care and Assessment Program (NIDCAP).</b><br><br>Infants received care according to general NIDCAP principles and parents were taught how to provide it. Caregiving plans were designed on the basis of the infant's current developmental stage and medical condition as well as on the needs of the family. Caregivers learnt to watch sensitively and note the reactions of the infant to different types of handling and care, and thus make continuously appropriate adjustments.<br><br><u>Control:</u> Infants received traditional neonatal care practiced at that time. | <i>Parent satisfaction relating to:</i><br>-Overall rating<br>-Care of the baby<br>-Communication with staff<br>-Involvement in care<br>-Being prepared<br>-Support<br>-Being a parent<br>-Being near your baby<br>-Total score                                   | After babies were discharged (on day of discharge/transfer)<br><br>- Pre NIDCAP cohort<br><br>- Post NIDCAP cohort                           | <i>Satisfaction questionnaire (Validated)</i><br><br>The NICU-PSF was used and translated from English to Dutch <sup>34</sup> .<br><br>62 questions<br><br>Closed and open-ended questions.<br><br>Different rating scales used (5-point rating scale from "extremely satisfied" to "not at all satisfied" or "excellent" to "poor").<br><br>Total score range (50-243 points)                                                                                                                                                                                                                                                                                                                                                                                                                                                                                                                                                                                                                                                | <b>The intervention group's mean total score was significantly higher than the control.</b><br><br><table border="1"> <thead> <tr> <th></th> <th>Intervention</th> <th>Control</th> <th></th> </tr> </thead> <tbody> <tr> <td>Mean (SD)</td> <td>185.67(17.74)</td> <td>174.04(20.98)</td> <td></td> </tr> <tr> <td>p-value</td> <td colspan="2">0.041</td> <td></td> </tr> </tbody> </table><br><br>Almost all separate concepts showed an increase in their mean scores. The concept of "being a parent" had a slightly lower mean score (9.39, SD = 1.73) in the intervention group than in the control group (9.78, SD = 2.09).<br><br><b>The concept of "preparedness" showed statistically significant difference:</b><br><table border="1"> <thead> <tr> <th></th> <th>Intervention</th> <th>Control</th> <th>p-value</th> </tr> </thead> <tbody> <tr> <td>Mean</td> <td>16.38</td> <td>13.83</td> <td>0.038</td> </tr> </tbody> </table> |  | Intervention | Control |         | Mean (SD)                 | 185.67(17.74) | 174.04(20.98) |  | p-value | 0.041 |       |       |                                | Intervention | Control | p-value | Mean | 16.38  | 13.83  | 0.038 | No | 1 |
|----------------------------------------------------------------------------------------------------------------------------------------------------------------------------------------------------------------------------------------------------------------|---------------------------------------------|----------------------------------------------------------------------------------------------------------------------------|----------------------------------------------------------------------------------|----------------------------------------------------------------------------------------------------------------------------------------------------------------------------------------------------------------------------------------------------------------------------------------------|--------------------------------------------------------------------------------------------------------------------------------------------------------------------------------------------------------------------------------------------------------------------------------------------------------------------------------------------------------------------------------------------------------------------------------------------------------------------------------------------------------------------------------------------------------------------------------------------------------------------------------------------|-------------------------------------------------------------------------------------------------------------------------------------------------------------------------------------------------------------------------------------------------------------------|----------------------------------------------------------------------------------------------------------------------------------------------|-------------------------------------------------------------------------------------------------------------------------------------------------------------------------------------------------------------------------------------------------------------------------------------------------------------------------------------------------------------------------------------------------------------------------------------------------------------------------------------------------------------------------------------------------------------------------------------------------------------------------------------------------------------------------------------------------------------------------------------------------------------------------------------------------------------------------------------------------------------------------------------------------------------------------------------------------------------------------------------------------------------------------------|--------------------------------------------------------------------------------------------------------------------------------------------------------------------------------------------------------------------------------------------------------------------------------------------------------------------------------------------------------------------------------------------------------------------------------------------------------------------------------------------------------------------------------------------------------------------------------------------------------------------------------------------------------------------------------------------------------------------------------------------------------------------------------------------------------------------------------------------------------------------------------------------------------------------------------------------------|--|--------------|---------|---------|---------------------------|---------------|---------------|--|---------|-------|-------|-------|--------------------------------|--------------|---------|---------|------|--------|--------|-------|----|---|
|                                                                                                                                                                                                                                                                | Intervention                                | Control                                                                                                                    |                                                                                  |                                                                                                                                                                                                                                                                                              |                                                                                                                                                                                                                                                                                                                                                                                                                                                                                                                                                                                                                                            |                                                                                                                                                                                                                                                                   |                                                                                                                                              |                                                                                                                                                                                                                                                                                                                                                                                                                                                                                                                                                                                                                                                                                                                                                                                                                                                                                                                                                                                                                               |                                                                                                                                                                                                                                                                                                                                                                                                                                                                                                                                                                                                                                                                                                                                                                                                                                                                                                                                                  |  |              |         |         |                           |               |               |  |         |       |       |       |                                |              |         |         |      |        |        |       |    |   |
| Mean (SD)                                                                                                                                                                                                                                                      | 185.67(17.74)                               | 174.04(20.98)                                                                                                              |                                                                                  |                                                                                                                                                                                                                                                                                              |                                                                                                                                                                                                                                                                                                                                                                                                                                                                                                                                                                                                                                            |                                                                                                                                                                                                                                                                   |                                                                                                                                              |                                                                                                                                                                                                                                                                                                                                                                                                                                                                                                                                                                                                                                                                                                                                                                                                                                                                                                                                                                                                                               |                                                                                                                                                                                                                                                                                                                                                                                                                                                                                                                                                                                                                                                                                                                                                                                                                                                                                                                                                  |  |              |         |         |                           |               |               |  |         |       |       |       |                                |              |         |         |      |        |        |       |    |   |
| p-value                                                                                                                                                                                                                                                        | 0.041                                       |                                                                                                                            |                                                                                  |                                                                                                                                                                                                                                                                                              |                                                                                                                                                                                                                                                                                                                                                                                                                                                                                                                                                                                                                                            |                                                                                                                                                                                                                                                                   |                                                                                                                                              |                                                                                                                                                                                                                                                                                                                                                                                                                                                                                                                                                                                                                                                                                                                                                                                                                                                                                                                                                                                                                               |                                                                                                                                                                                                                                                                                                                                                                                                                                                                                                                                                                                                                                                                                                                                                                                                                                                                                                                                                  |  |              |         |         |                           |               |               |  |         |       |       |       |                                |              |         |         |      |        |        |       |    |   |
|                                                                                                                                                                                                                                                                | Intervention                                | Control                                                                                                                    | p-value                                                                          |                                                                                                                                                                                                                                                                                              |                                                                                                                                                                                                                                                                                                                                                                                                                                                                                                                                                                                                                                            |                                                                                                                                                                                                                                                                   |                                                                                                                                              |                                                                                                                                                                                                                                                                                                                                                                                                                                                                                                                                                                                                                                                                                                                                                                                                                                                                                                                                                                                                                               |                                                                                                                                                                                                                                                                                                                                                                                                                                                                                                                                                                                                                                                                                                                                                                                                                                                                                                                                                  |  |              |         |         |                           |               |               |  |         |       |       |       |                                |              |         |         |      |        |        |       |    |   |
| Mean                                                                                                                                                                                                                                                           | 16.38                                       | 13.83                                                                                                                      | 0.038                                                                            |                                                                                                                                                                                                                                                                                              |                                                                                                                                                                                                                                                                                                                                                                                                                                                                                                                                                                                                                                            |                                                                                                                                                                                                                                                                   |                                                                                                                                              |                                                                                                                                                                                                                                                                                                                                                                                                                                                                                                                                                                                                                                                                                                                                                                                                                                                                                                                                                                                                                               |                                                                                                                                                                                                                                                                                                                                                                                                                                                                                                                                                                                                                                                                                                                                                                                                                                                                                                                                                  |  |              |         |         |                           |               |               |  |         |       |       |       |                                |              |         |         |      |        |        |       |    |   |
| 18<br>19<br>20<br>21<br>22<br>23<br>24<br>25<br>26<br>27<br>28<br>29<br>30<br>31<br>32<br>33<br>34<br>35<br>36<br>37<br>38<br>39<br>40<br>41<br>42<br>43<br>44<br>45<br>46<br>47<br>48<br>49<br>50<br>51<br>52<br>53<br>54<br>55<br>56<br>57<br>58<br>59<br>60 | 19. Penticuff and Arheart. (2005), USA      | Dyads (both parents or mother with her designated support person)/ 122 mothers<br><br>Results based only on mothers' data. | Not stated                                                                       | A repeated measures design<br><br>- First 2 years (control group data collection)<br><br>- Year 3 (staff training)<br><br>- Year 4 (implementing the intervention)<br><br>- Year 5 (collecting data from the intervention group)<br><br><i>Unit level effect:</i> Two different time periods | <b>Intervention: The Newborn Individualised IPC- CPM intervention (Infant Progress Chart) - (Care Planning Meetings).</b><br><br>Both the mother and father (or the mother and her designated support person) were shown how to use the Infant Progress Chart and attended 3 Care Planning Meetings (with neonatologists/Neonatal Nurse Practitioners).<br><br><u>Control:</u> During the control phase, professionals carried out usual communication and interaction with control group parents.                                                                                                                                         | <i>Satisfaction with participation in decision making</i> was measured by 5 collaboration indices:<br><br>Satisfaction with<br>(1) Care<br>(2) Relationships with professionals<br>(3) Decision input<br>(4) The process of decision making<br>(5) Decisions made | During babies' admission (three times)<br><br>- Within 0–3 days<br><br>- 9– 12 days<br><br>- 25–28 days of an infant's admission to the NICU | <i>Three satisfaction questionnaires</i><br><br>1. Two subscales of the investigator-designed "Parents' Understanding of Infant Care and Outcomes Questionnaire" were used to measure Satisfaction with Care (1).<br><br><u>Validation:</u> Partially reported. Authors stated content validity testing took place; no information on reliability testing provided.<br><br>30 questions.<br><br>Five-point Likert scale.<br><br>2. A subscale of the investigator-designed "Relationships with Professional and Decision Input Questionnaire" was used to measure Satisfaction with relationships (2).<br><br><u>Validation:</u> Partially reported. Authors stated content validity testing took place; no information on reliability testing provided.<br>12 questions.<br><br>Five-point Likert scale<br><br>3. <u>Validated.</u> The "Collaboration and Satisfaction About Care Questionnaire" developed by Baggs <sup>35</sup> , was used to measure Satisfaction with decision input (3), with decision process (4) and | <b>The intervention group was more satisfied with the amount of decision input they had (3) and with the process by which medical decisions were made (4).</b><br><br><table border="1"> <thead> <tr> <th></th> <th>Intervention</th> <th>Control</th> <th>p-value</th> </tr> </thead> <tbody> <tr> <td>Decision input amount (3)</td> <td></td> <td></td> <td></td> </tr> <tr> <td>Mean</td> <td>33.44</td> <td>30.05</td> <td>0.058</td> </tr> <tr> <td>Process of decision making (4)</td> <td></td> <td></td> <td></td> </tr> <tr> <td>Mean</td> <td>120.20</td> <td>104.95</td> <td>0.012</td> </tr> </tbody> </table><br><br>There were no statistically significant differences between control and intervention groups in satisfaction with their infants' care (1), with relationships with NICU professionals (2) and with the decisions made for infant treatment (5).                                                                |  | Intervention | Control | p-value | Decision input amount (3) |               |               |  | Mean    | 33.44 | 30.05 | 0.058 | Process of decision making (4) |              |         |         | Mean | 120.20 | 104.95 | 0.012 | No | 1 |
|                                                                                                                                                                                                                                                                | Intervention                                | Control                                                                                                                    | p-value                                                                          |                                                                                                                                                                                                                                                                                              |                                                                                                                                                                                                                                                                                                                                                                                                                                                                                                                                                                                                                                            |                                                                                                                                                                                                                                                                   |                                                                                                                                              |                                                                                                                                                                                                                                                                                                                                                                                                                                                                                                                                                                                                                                                                                                                                                                                                                                                                                                                                                                                                                               |                                                                                                                                                                                                                                                                                                                                                                                                                                                                                                                                                                                                                                                                                                                                                                                                                                                                                                                                                  |  |              |         |         |                           |               |               |  |         |       |       |       |                                |              |         |         |      |        |        |       |    |   |
| Decision input amount (3)                                                                                                                                                                                                                                      |                                             |                                                                                                                            |                                                                                  |                                                                                                                                                                                                                                                                                              |                                                                                                                                                                                                                                                                                                                                                                                                                                                                                                                                                                                                                                            |                                                                                                                                                                                                                                                                   |                                                                                                                                              |                                                                                                                                                                                                                                                                                                                                                                                                                                                                                                                                                                                                                                                                                                                                                                                                                                                                                                                                                                                                                               |                                                                                                                                                                                                                                                                                                                                                                                                                                                                                                                                                                                                                                                                                                                                                                                                                                                                                                                                                  |  |              |         |         |                           |               |               |  |         |       |       |       |                                |              |         |         |      |        |        |       |    |   |
| Mean                                                                                                                                                                                                                                                           | 33.44                                       | 30.05                                                                                                                      | 0.058                                                                            |                                                                                                                                                                                                                                                                                              |                                                                                                                                                                                                                                                                                                                                                                                                                                                                                                                                                                                                                                            |                                                                                                                                                                                                                                                                   |                                                                                                                                              |                                                                                                                                                                                                                                                                                                                                                                                                                                                                                                                                                                                                                                                                                                                                                                                                                                                                                                                                                                                                                               |                                                                                                                                                                                                                                                                                                                                                                                                                                                                                                                                                                                                                                                                                                                                                                                                                                                                                                                                                  |  |              |         |         |                           |               |               |  |         |       |       |       |                                |              |         |         |      |        |        |       |    |   |
| Process of decision making (4)                                                                                                                                                                                                                                 |                                             |                                                                                                                            |                                                                                  |                                                                                                                                                                                                                                                                                              |                                                                                                                                                                                                                                                                                                                                                                                                                                                                                                                                                                                                                                            |                                                                                                                                                                                                                                                                   |                                                                                                                                              |                                                                                                                                                                                                                                                                                                                                                                                                                                                                                                                                                                                                                                                                                                                                                                                                                                                                                                                                                                                                                               |                                                                                                                                                                                                                                                                                                                                                                                                                                                                                                                                                                                                                                                                                                                                                                                                                                                                                                                                                  |  |              |         |         |                           |               |               |  |         |       |       |       |                                |              |         |         |      |        |        |       |    |   |
| Mean                                                                                                                                                                                                                                                           | 120.20                                      | 104.95                                                                                                                     | 0.012                                                                            |                                                                                                                                                                                                                                                                                              |                                                                                                                                                                                                                                                                                                                                                                                                                                                                                                                                                                                                                                            |                                                                                                                                                                                                                                                                   |                                                                                                                                              |                                                                                                                                                                                                                                                                                                                                                                                                                                                                                                                                                                                                                                                                                                                                                                                                                                                                                                                                                                                                                               |                                                                                                                                                                                                                                                                                                                                                                                                                                                                                                                                                                                                                                                                                                                                                                                                                                                                                                                                                  |  |              |         |         |                           |               |               |  |         |       |       |       |                                |              |         |         |      |        |        |       |    |   |

|                                        |                                  |                                                                 |                                                                                                                                                                                |                                                                                                                                                                                                                                                                                                                                                                                                                                                                                                                                                                                                                                                                              |                                                                                                                                                                                                                                                                                                                         |                                                                                                                                                                                                                                     | with decisions made (5).<br>9 questions.<br>7-point scale, (1 strongly disagree -7 strongly agree)                                                                                                                                                                                                                                                                                                                                                                                                                                        |                                                                                                                                                                                                                                                                                                                                                                                                                                                                                                                                                                                                                             |    |              |         |         |      |      |      |       |    |   |
|----------------------------------------|----------------------------------|-----------------------------------------------------------------|--------------------------------------------------------------------------------------------------------------------------------------------------------------------------------|------------------------------------------------------------------------------------------------------------------------------------------------------------------------------------------------------------------------------------------------------------------------------------------------------------------------------------------------------------------------------------------------------------------------------------------------------------------------------------------------------------------------------------------------------------------------------------------------------------------------------------------------------------------------------|-------------------------------------------------------------------------------------------------------------------------------------------------------------------------------------------------------------------------------------------------------------------------------------------------------------------------|-------------------------------------------------------------------------------------------------------------------------------------------------------------------------------------------------------------------------------------|-------------------------------------------------------------------------------------------------------------------------------------------------------------------------------------------------------------------------------------------------------------------------------------------------------------------------------------------------------------------------------------------------------------------------------------------------------------------------------------------------------------------------------------------|-----------------------------------------------------------------------------------------------------------------------------------------------------------------------------------------------------------------------------------------------------------------------------------------------------------------------------------------------------------------------------------------------------------------------------------------------------------------------------------------------------------------------------------------------------------------------------------------------------------------------------|----|--------------|---------|---------|------|------|------|-------|----|---|
| 20. Byers et al. (2003), USA           | Mothers/ 19                      | Mean (SD)<br>Intervention: 28.9 (2.42)<br>Control: 29 (2.00)    | For the outcome of parent satisfaction:<br>Non-randomised, Convenience sampling<br><i>Group level effect:</i> Intervention/control groups<br>Pre and post-intervention testing | <b>Intervention: Co-bedding premature multiple-gestation infants in incubators.</b><br><br>Infants were nursed in the same incubator using a co-bedding protocol (e.g. recording all of the care provided to one infant before providing care to the second infant)<br><br><b>Control:</b> Single-bedding premature multiple-gestation infants in incubators.                                                                                                                                                                                                                                                                                                                | <i>Parent satisfaction related to:</i><br>- staff concern<br>- support of family<br>- staff explanations<br>- infant environment,<br>- comfort with feeding<br>- kangaroo care encouragement<br>- staff explanation of signs of infant stress<br>- visiting schedule<br>- overall satisfaction with the NICU experience | During babies' admission (twice)<br><br>- At baseline<br><br>- 5 days later                                                                                                                                                         | <i>Satisfaction questionnaire</i><br><br>The NICU's standard parental satisfaction tool was used.<br><br><i>Validation:</i> Partially reported. Authors stated content validity testing took place, but because of the disparate nature of the items, survey reliability could not be assessed.<br><br>11 questions.<br><br>5-point Likert-type scale.                                                                                                                                                                                    | <b>The only significant difference for a post-intervention item was a higher score for the item "Attempts were made to create a quiet environment for my baby."</b><br><br><table border="1"><thead><tr><th></th><th>Intervention</th><th>Control</th><th>p-value</th></tr></thead><tbody><tr><td>Mean</td><td>4.80</td><td>3.89</td><td>0.033</td></tr></tbody></table><br>Independent t-tests comparing the co-bedded and control group parental scores found no significant differences in their parental satisfaction scores, except for higher baseline parental satisfaction scores (p=0.029) in the co-bedded group. |    | Intervention | Control | p-value | Mean | 4.80 | 3.89 | 0.033 | No | 1 |
|                                        | Intervention                     | Control                                                         | p-value                                                                                                                                                                        |                                                                                                                                                                                                                                                                                                                                                                                                                                                                                                                                                                                                                                                                              |                                                                                                                                                                                                                                                                                                                         |                                                                                                                                                                                                                                     |                                                                                                                                                                                                                                                                                                                                                                                                                                                                                                                                           |                                                                                                                                                                                                                                                                                                                                                                                                                                                                                                                                                                                                                             |    |              |         |         |      |      |      |       |    |   |
| Mean                                   | 4.80                             | 3.89                                                            | 0.033                                                                                                                                                                          |                                                                                                                                                                                                                                                                                                                                                                                                                                                                                                                                                                                                                                                                              |                                                                                                                                                                                                                                                                                                                         |                                                                                                                                                                                                                                     |                                                                                                                                                                                                                                                                                                                                                                                                                                                                                                                                           |                                                                                                                                                                                                                                                                                                                                                                                                                                                                                                                                                                                                                             |    |              |         |         |      |      |      |       |    |   |
| 21. Polizzi et al. (2003), USA         | Mothers and fathers/ 33          | Mean (SD)<br>Intervention: 33.08 (1.31)<br>Control: 32.97 (1.9) | A retrospective, comparative, descriptive design.<br><br><i>Unit level effect</i>                                                                                              | <b>Intervention: Co-bedding multiple-gestation infants in the NICU.</b><br><br>Multiple-gestation infants were nursed in the same incubator or crib. The intervention was evaluated retrospectively after implementation of a co-bedding practice protocol.<br><br><b>Control:</b> Traditionally-bedded group (babies were routinely placed in separate incubators or cribs)                                                                                                                                                                                                                                                                                                 | <i>Parental satisfaction as measured by 9 questions relating to parent perceptions and their baby's care</i>                                                                                                                                                                                                            | After babies were discharged (once)<br><br>- All parents were mailed the survey. A second survey was sent to those who did not respond after 2 months<br><br>No pre-intervention parent satisfaction data available for comparison. | <i>Satisfaction questionnaire</i><br><br>The parental perception/satisfaction tool was used.<br><br><i>Validation:</i> Partially reported. Authors stated content validity testing took place; no information on reliability testing provided. 6/9 questions were from a similar tool that was validated by the Vermont Oxford NICU Quality Improvement Initiative <sup>36</sup> .<br><br>9 questions (such as "I was satisfied with the care my babies received in the hospital").<br><br>Likert (1 strongly disagree- 5 strongly agree) | Mothers reported overall satisfaction with the NICU care and staff, as well as adequacy of their ability to care for their infants after discharge, with scores ranging from 4.19 to 4.71.<br><br><b>The only survey item score that was significantly different between groups was for the item "I was encouraged by the hospital staff to bond with my babies."</b><br><br><table border="1"><thead><tr><th></th><th>Intervention</th><th>Control</th><th>p-value</th></tr></thead><tbody><tr><td>Mean</td><td>4.71</td><td>4.36</td><td>0.049</td></tr></tbody></table>                                                  |    | Intervention | Control | p-value | Mean | 4.71 | 4.36 | 0.049 | No | 1 |
|                                        | Intervention                     | Control                                                         | p-value                                                                                                                                                                        |                                                                                                                                                                                                                                                                                                                                                                                                                                                                                                                                                                                                                                                                              |                                                                                                                                                                                                                                                                                                                         |                                                                                                                                                                                                                                     |                                                                                                                                                                                                                                                                                                                                                                                                                                                                                                                                           |                                                                                                                                                                                                                                                                                                                                                                                                                                                                                                                                                                                                                             |    |              |         |         |      |      |      |       |    |   |
| Mean                                   | 4.71                             | 4.36                                                            | 0.049                                                                                                                                                                          |                                                                                                                                                                                                                                                                                                                                                                                                                                                                                                                                                                                                                                                                              |                                                                                                                                                                                                                                                                                                                         |                                                                                                                                                                                                                                     |                                                                                                                                                                                                                                                                                                                                                                                                                                                                                                                                           |                                                                                                                                                                                                                                                                                                                                                                                                                                                                                                                                                                                                                             |    |              |         |         |      |      |      |       |    |   |
| 22. Legault and Goulet. (1995), Canada | Mothers/ 61 completed both tests | Mean (range)<br>30 (24-35)                                      | Time-series design<br><br><i>Group level effect:</i> Same group exposed to both methods with post-method testing only.                                                         | <b>Intervention: Kangaroo method of removing an infant from an incubator.</b><br><br>Mothers were taught the "kangaroo method" (skin-to-skin contact): the infant wears a diaper and a head cap and is placed in a vertical position on the parent's bared chest. A flannel blanket covers the infant's back, and the parent's clothing is fastened around the infant. The parent sits in a rocking chair, inclined so that the infant's head is at an angle of approximately 60'.<br><br><b>Control:</b> Traditional method. Newborns wearing a diaper and a head cap, are wrapped in a blanket and placed in their parent's arms. The parent keeps the infant's head at an | <i>Mothers' satisfaction with:</i><br>- Each method of removing an infant from incubator<br>- Her feelings after each method                                                                                                                                                                                            | During babies' admission (twice)<br><br>- After the intervention<br><br>- After the control method<br><br>No pre-intervention parent satisfaction data available for comparison.                                                    | <i>Satisfaction questionnaire</i><br><br>The "Maternal Satisfaction Questionnaire" was used. It was developed by integrating components described by Affonso et al <sup>37</sup> and the clinical experience of the investigators.<br><br><i>Validation:</i> Partially reported. Authors stated content validity testing took place; no information on reliability testing provided.<br><br>15 questions<br><br>Likert (1 very much-5                                                                                                     | <b>Regardless of the method tested, mothers expressed high levels of satisfaction (it was the first time since giving birth that they could hold their infants).</b><br><br>Three statements proved more powerful in discriminating between the methods:<br><br><b>Rated higher after the kangaroo method test:</b><br>- "I like the contact with my baby's skin" (p=0.0001)<br><br><b>Rated higher after the traditional method test:</b><br>- "I like to talk to and whisper to my baby" (p = 0.015)<br>- "I looked into my baby's eyes and stared at his/her face" (p=0.0001)                                            | No | 1            |         |         |      |      |      |       |    |   |

|    |  |  |  |                                                                                        |  |  |                                                                                                        |  |  |  |
|----|--|--|--|----------------------------------------------------------------------------------------|--|--|--------------------------------------------------------------------------------------------------------|--|--|--|
|    |  |  |  | angle of approximately 60° to allow for better pulmonary functional residual capacity. |  |  | don't know)                                                                                            |  |  |  |
| 1  |  |  |  |                                                                                        |  |  | An open-ended question invited the mother to list and explain anything else related to her experience. |  |  |  |
| 2  |  |  |  |                                                                                        |  |  |                                                                                                        |  |  |  |
| 3  |  |  |  |                                                                                        |  |  |                                                                                                        |  |  |  |
| 4  |  |  |  |                                                                                        |  |  |                                                                                                        |  |  |  |
| 5  |  |  |  |                                                                                        |  |  |                                                                                                        |  |  |  |
| 6  |  |  |  |                                                                                        |  |  |                                                                                                        |  |  |  |
| 7  |  |  |  |                                                                                        |  |  |                                                                                                        |  |  |  |
| 8  |  |  |  |                                                                                        |  |  |                                                                                                        |  |  |  |
| 9  |  |  |  |                                                                                        |  |  |                                                                                                        |  |  |  |
| 10 |  |  |  |                                                                                        |  |  |                                                                                                        |  |  |  |
| 11 |  |  |  |                                                                                        |  |  |                                                                                                        |  |  |  |
| 12 |  |  |  |                                                                                        |  |  |                                                                                                        |  |  |  |
| 13 |  |  |  |                                                                                        |  |  |                                                                                                        |  |  |  |
| 14 |  |  |  |                                                                                        |  |  |                                                                                                        |  |  |  |
| 15 |  |  |  |                                                                                        |  |  |                                                                                                        |  |  |  |
| 16 |  |  |  |                                                                                        |  |  |                                                                                                        |  |  |  |
| 17 |  |  |  |                                                                                        |  |  |                                                                                                        |  |  |  |
| 18 |  |  |  |                                                                                        |  |  |                                                                                                        |  |  |  |
| 19 |  |  |  |                                                                                        |  |  |                                                                                                        |  |  |  |
| 20 |  |  |  |                                                                                        |  |  |                                                                                                        |  |  |  |
| 21 |  |  |  |                                                                                        |  |  |                                                                                                        |  |  |  |
| 22 |  |  |  |                                                                                        |  |  |                                                                                                        |  |  |  |
| 23 |  |  |  |                                                                                        |  |  |                                                                                                        |  |  |  |
| 24 |  |  |  |                                                                                        |  |  |                                                                                                        |  |  |  |
| 25 |  |  |  |                                                                                        |  |  |                                                                                                        |  |  |  |
| 26 |  |  |  |                                                                                        |  |  |                                                                                                        |  |  |  |
| 27 |  |  |  |                                                                                        |  |  |                                                                                                        |  |  |  |
| 28 |  |  |  |                                                                                        |  |  |                                                                                                        |  |  |  |
| 29 |  |  |  |                                                                                        |  |  |                                                                                                        |  |  |  |
| 30 |  |  |  |                                                                                        |  |  |                                                                                                        |  |  |  |
| 31 |  |  |  |                                                                                        |  |  |                                                                                                        |  |  |  |
| 32 |  |  |  |                                                                                        |  |  |                                                                                                        |  |  |  |
| 33 |  |  |  |                                                                                        |  |  |                                                                                                        |  |  |  |
| 34 |  |  |  |                                                                                        |  |  |                                                                                                        |  |  |  |
| 35 |  |  |  |                                                                                        |  |  |                                                                                                        |  |  |  |
| 36 |  |  |  |                                                                                        |  |  |                                                                                                        |  |  |  |
| 37 |  |  |  |                                                                                        |  |  |                                                                                                        |  |  |  |
| 38 |  |  |  |                                                                                        |  |  |                                                                                                        |  |  |  |
| 39 |  |  |  |                                                                                        |  |  |                                                                                                        |  |  |  |
| 40 |  |  |  |                                                                                        |  |  |                                                                                                        |  |  |  |
| 41 |  |  |  |                                                                                        |  |  |                                                                                                        |  |  |  |
| 42 |  |  |  |                                                                                        |  |  |                                                                                                        |  |  |  |
| 43 |  |  |  |                                                                                        |  |  |                                                                                                        |  |  |  |
| 44 |  |  |  |                                                                                        |  |  |                                                                                                        |  |  |  |
| 45 |  |  |  |                                                                                        |  |  |                                                                                                        |  |  |  |
| 46 |  |  |  |                                                                                        |  |  |                                                                                                        |  |  |  |
| 47 |  |  |  |                                                                                        |  |  |                                                                                                        |  |  |  |
| 48 |  |  |  |                                                                                        |  |  |                                                                                                        |  |  |  |
| 49 |  |  |  |                                                                                        |  |  |                                                                                                        |  |  |  |
| 50 |  |  |  |                                                                                        |  |  |                                                                                                        |  |  |  |
| 51 |  |  |  |                                                                                        |  |  |                                                                                                        |  |  |  |
| 52 |  |  |  |                                                                                        |  |  |                                                                                                        |  |  |  |
| 53 |  |  |  |                                                                                        |  |  |                                                                                                        |  |  |  |
| 54 |  |  |  |                                                                                        |  |  |                                                                                                        |  |  |  |
| 55 |  |  |  |                                                                                        |  |  |                                                                                                        |  |  |  |
| 56 |  |  |  |                                                                                        |  |  |                                                                                                        |  |  |  |
| 57 |  |  |  |                                                                                        |  |  |                                                                                                        |  |  |  |
| 58 |  |  |  |                                                                                        |  |  |                                                                                                        |  |  |  |
| 59 |  |  |  |                                                                                        |  |  |                                                                                                        |  |  |  |
| 60 |  |  |  |                                                                                        |  |  |                                                                                                        |  |  |  |

Confidential: For Review Only

- 1
- 2
- 3
- 4 1. intervention\$.ti,ab.
- 5 2. tool\$.ti,ab.
- 6
- 7 3. way\$.ti,ab.
- 8
- 9 4. updat\$.ti,ab.
- 10 5. method\$.ti,ab.
- 11
- 12 6. information.ti,ab.
- 13
- 14 7. sms.ti,ab.
- 15 8. implement\$.ti,ab.
- 16
- 17 9. 1 or 2 or 3 or 4 or 5 or 6 or 7 or 8
- 18 10. bab\$3.mp.
- 19
- 20 11. preterm\$.ti,ab.
- 21 12. pre term.ti,ab.
- 22
- 23 13. premature.ti,ab.
- 24
- 25 14. postterm.ti,ab.
- 26 15. post term.ti,ab.
- 27
- 28 16. infant\$.ti,ab.
- 29 17. newborn\$.ti,ab.
- 30
- 31 18. exp Infant, Newborn/
- 32
- 33 19. 10 or 11 or 12 or 13 or 14 or 15 or 16 or 17 or 18
- 34
- 35 20. neonatal intensive care.ti,ab.
- 36 21. neonatal unit\$.ti,ab.
- 37
- 38 22. NICU.ti,ab.
- 39
- 40 23. SCBU.ti,ab.
- 41 24. neonatal itu.ti,ab.
- 42
- 43 25. special care baby unit\$.ti,ab.
- 44
- 45 26. neonat\$.ti,ab.
- 46 27. Intensive Care Units, Neonatal/
- 47 28. Intensive Care Units/
- 48
- 49 29. Critical Care/
- 50
- 51 30. Neonatal Nursing/
- 52 31. 20 or 21 or 22 or 23 or 24 or 25 or 26 or 27 or 28 or 29 or 30
- 53
- 54 32. parent\$.ti,ab.
- 55 33. mother\$.ti,ab.
- 56 34. father\$.ti,ab.
- 57
- 58 35. exp Parents/
- 59
- 60

1  
2  
3  
4  
5  
6  
7  
8  
9  
10  
11  
12  
13  
14  
15  
16  
17  
18  
19  
20  
21  
22  
23  
24  
25  
26  
27  
28  
29  
30  
31  
32  
33  
34  
35  
36  
37  
38  
39  
40  
41  
42  
43  
44  
45  
46  
47  
48  
49  
50  
51  
52  
53  
54  
55  
56  
57  
58  
59  
60

- 36. 32 or 33 or 34 or 35
- 37. satisfaction.ti,ab.
- 38. experience\$.ti,ab.
- 39. Patient Satisfaction/
- 40. personal satisfaction/
- 41. communicat\$.ti,ab.
- 42. exp Communication/
- 43. Health Communication/
- 44. Information Dissemination/
- 45. 37 or 38 or 39 or 40 or 41 or 42 or 43 or 44
- 46. 9 and 19 and 31 and 36 and 45

ential: For Review Only

# BMJ Paediatrics Open

## Interventions to improve quantitative measures of parent satisfaction in neonatal care: a systematic review

|                               |                                                                                                                                                                                                                                                                                                                                                                                                                                                                                                                                                                                                              |
|-------------------------------|--------------------------------------------------------------------------------------------------------------------------------------------------------------------------------------------------------------------------------------------------------------------------------------------------------------------------------------------------------------------------------------------------------------------------------------------------------------------------------------------------------------------------------------------------------------------------------------------------------------|
| Journal:                      | <i>BMJ Paediatrics Open</i>                                                                                                                                                                                                                                                                                                                                                                                                                                                                                                                                                                                  |
| Manuscript ID                 | bmjpo-2019-000613.R1                                                                                                                                                                                                                                                                                                                                                                                                                                                                                                                                                                                         |
| Article Type:                 | Original research                                                                                                                                                                                                                                                                                                                                                                                                                                                                                                                                                                                            |
| Date Submitted by the Author: | 17-Dec-2019                                                                                                                                                                                                                                                                                                                                                                                                                                                                                                                                                                                                  |
| Complete List of Authors:     | Sakonidou, Susanna; Imperial College London, Neonatal Medicine, School of Public Health, Faculty of Medicine<br>Andrzejewska, Izabela; Imperial College London, Neonatal Medicine, School of Public Health, Faculty of Medicine<br>Webbe, James; Imperial College London, Neonatal Medicine, School of Public Health, Faculty of Medicine<br>Modi, Neena; Imperial College London, Neonatal Medicine, School of Public Health, Faculty of Medicine<br>Bell, Derek; NIHR CLAHRC for Northwest London<br>Gale, Chris; Imperial College London, Neonatal Medicine, School of Public Health, Faculty of Medicine |
| Keywords:                     | Neonatology, Outcomes research, Patient perspective                                                                                                                                                                                                                                                                                                                                                                                                                                                                                                                                                          |
|                               |                                                                                                                                                                                                                                                                                                                                                                                                                                                                                                                                                                                                              |

SCHOLARONE™  
Manuscripts





I, the Submitting Author has the right to grant and does grant on behalf of all authors of the Work (as defined in the below author licence), an exclusive licence and/or a non-exclusive licence for contributions from authors who are: i) UK Crown employees; ii) where BMJ has agreed a CC-BY licence shall apply, and/or iii) in accordance with the terms applicable for US Federal Government officers or employees acting as part of their official duties; on a worldwide, perpetual, irrevocable, royalty-free basis to BMJ Publishing Group Ltd ("BMJ") its licensees and where the relevant Journal is co-owned by BMJ to the co-owners of the Journal, to publish the Work in this journal and any other BMJ products and to exploit all rights, as set out in our [licence](#).

The Submitting Author accepts and understands that any supply made under these terms is made by BMJ to the Submitting Author unless you are acting as an employee on behalf of your employer or a postgraduate student of an affiliated institution which is paying any applicable article publishing charge ("APC") for Open Access articles. Where the Submitting Author wishes to make the Work available on an Open Access basis (and intends to pay the relevant APC), the terms of reuse of such Open Access shall be governed by a Creative Commons licence – details of these licences and which [Creative Commons](#) licence will apply to this Work are set out in our licence referred to above.

Other than as permitted in any relevant BMJ Author's Self Archiving Policies, I confirm this Work has not been accepted for publication elsewhere, is not being considered for publication elsewhere and does not duplicate material already published. I confirm all authors consent to publication of this Work and authorise the granting of this licence.

1 **Interventions to improve quantitative measures of parent satisfaction in**  
2 **neonatal care: a systematic review**

3  
4  
5  
6  
7  
8  
9  
10  
11  
12  
13  
14  
15  
16  
17  
18  
19  
20  
21  
22  
23  
24  
25  
26  
27  
28  
29  
30  
31  
32  
33  
34  
35  
36  
37  
38  
39  
40  
41  
42  
43  
44  
45  
46  
47  
48  
49  
50  
51  
52  
53  
54  
55  
56  
57  
58  
59  
60

4 Susanna Sakonidou<sup>1</sup>, Izabela Andrzejewska<sup>2</sup>, James Webbe<sup>3</sup>, Neena Modi<sup>4</sup>, Derek  
5 Bell<sup>5</sup>, Chris Gale<sup>6</sup>

6  
7 1 Susanna Sakonidou, Clinical Research Fellow

8 Highest academic degree: MBBS

9 Neonatal Medicine, School of Public Health, Faculty of Medicine, Imperial College

10 London, United Kingdom.

11 s.sakonidou@imperial.ac.uk

12  
13 2 Izabela Andrzejewska, Neonatal Research Nurse

14 Highest academic degree: RN MSc

15 Neonatal Medicine, School of Public Health, Faculty of Medicine, Imperial College

16 London, United Kingdom.

17 Izabela.ukpl@gmail.com

18  
19 3 James Webbe, Clinical Research Fellow

20 Highest academic degree: MB BChir

21 Neonatal Medicine, School of Public Health, Faculty of Medicine, Imperial College.

22 London, United Kingdom.

23 j.webbe@imperial.ac.uk

24  
25 4 Neena Modi, Professor of Neonatal Medicine

1  
2  
3 26 Highest academic degree: MD  
4  
5 27 Neonatal Medicine, School of Public Health, Faculty of Medicine, Imperial College  
6  
7 28 London, United Kingdom.  
8  
9  
10 29 n.modi@imperial.ac.uk  
11  
12 30  
13  
14 31 5 Derek Bell, Professor of Acute Medicine and NIHR CLAHRC Programme Director  
15  
16  
17 32 Highest academic degree: MD  
18  
19 33 National Institute for Health Research Collaboration for Leadership in Applied  
20  
21 34 Health Research and Care, Northwest London, United Kingdom.  
22  
23 35 d.bell@imperial.ac.uk  
24  
25  
26 36  
27  
28 37 6 Chris Gale, Reader in Neonatal Medicine  
29  
30  
31 38 Highest academic degree: PhD  
32  
33 39 Neonatal Medicine, School of Public Health, Faculty of Medicine, Imperial College  
34  
35 40 London.  
36  
37 41 London, United Kingdom.  
38  
39 42 christopher.gale@imperial.ac.uk  
40  
41  
42 43  
43  
44 44 Corresponding Author  
45  
46 45 Susanna Sakonidou, Clinical Research Fellow  
47  
48 46 Neonatal Medicine, School of Public Health, Faculty of Medicine, Imperial College  
49  
50 47 London  
51  
52 48 369 Fulham Road, London, SW10 9NH, United Kingdom.  
53  
54 49 + 44 (0) 203 315 5418, s.sakonidou@imperial.ac.uk  
55  
56  
57 50  
58  
59  
60

1  
2  
3 51 Manuscript word count: 3245  
4  
5  
6 52

7  
8 53 **ABSTRACT**  
9

10 54

11  
12 55 **Objective**

13  
14 56 Interventions improving parent satisfaction can reduce parent stress, may improve  
15  
16 57 parent-infant bonding and infant outcomes. Our objective was to systematically  
17  
18 58 review neonatal interventions relating to parents of infants of all gestations where an  
19  
20 59 outcome was parent satisfaction.  
21  
22  
23

24 60

25  
26 61 **Methods**  
27

28  
29 62 We searched the databases MEDLINE, EMBASE, PsychINFO, Cochrane Central,  
30  
31 63 CINAHL, HMIC, Maternity and Infant Care between 1/1/1946-1/10/2017. Inclusion  
32  
33 64 criteria were randomised controlled trials (RCT), cohort studies and other non-  
34  
35 65 randomised studies if participants were parents of infants receiving neonatal care,  
36  
37 66 interventions were implemented in neonatal units (of any care level) and  $\geq 1$   
38  
39 67 quantitative outcome of parent satisfaction was measured. Included studies were  
40  
41 68 limited to the English language only. We extracted study characteristics,  
42  
43 69 interventions, outcomes and parent involvement in intervention design. Included  
44  
45 70 studies were not sufficiently homogenous to enable quantitative synthesis. We  
46  
47 71 assessed quality with the Cochrane Collaboration risk of bias tool (randomised) and  
48  
49 72 the ROBINS-I tool (non-randomised studies).  
50  
51  
52  
53

54 73

55  
56 74 **Results**  
57  
58  
59  
60

1  
2  
3 75 We identified 32 studies with satisfaction measures from over 2800 parents and  
4  
5 76 grouped interventions into 5 themes. Most studies were non-randomised involving  
6  
7 77 preterm infants. Parent satisfaction was measured by 334 different questions in 29  
8  
9  
10 78 questionnaires (only 6/29 fully validated). 18/32 studies reported higher parent  
11  
12 79 satisfaction in the intervention group. The theme with most studies reporting higher  
13  
14 80 satisfaction was parent involvement (10/14). Five (5/32) studies reported involving  
15  
16  
17 81 parents in intervention design. All studies had high risk of bias.  
18  
19  
20  
21  
22

### 23 83 **Conclusions**

24 84 Many interventions, commonly relating to parent involvement, are reported to  
25  
26 85 improve parent satisfaction. Inconsistency in satisfaction measurements and high risk  
27  
28 86 of bias makes this low-quality evidence. Standardised, validated parent satisfaction  
29  
30 87 measures are needed, as well as higher quality trials of parent experience involving  
31  
32  
33 88 parents in intervention design.  
34  
35  
36  
37  
38

39 90 **PROSPERO registration:** CRD42017072388  
40  
41  
42

43 92 **Keywords:** neonatology, parents, satisfaction  
44  
45  
46  
47

### 48 94 **INTRODUCTION**

49 95 One in 10 newborn babies in high-income countries require neonatal care[1]. This is  
50  
51 96 stressful for parents, who often develop anxiety, depression and Post Traumatic  
52  
53 97 Stress Disorder symptoms[2-4]. Parental stress interferes with parent-child  
54  
55  
56 98 bonding[5] and there is a well-established link between maternal mental health and  
57  
58 99 infant development[6]. Parent satisfaction, defined as “*the perception of parents’*  
59  
60

1  
2  
3 100 *needs and expectations being met*” is inversely related to parental stress[7]. As such,  
4  
5 101 it is increasingly being used as a parent experience measure and neonatal service  
6  
7 102 quality indicator. Interventions aimed at improving parent satisfaction have the  
8  
9 103 potential to reduce parent stress, improve parent-infant bonding[8] and infant  
10  
11 104 outcomes[9].  
12  
13  
14  
15  
16

17 106 A range of parent-centred interventions, such as including parents on ward rounds,  
18  
19 107 have recently become widespread in neonatal practice. Many are implemented on a  
20  
21 108 small scale, without evaluating their impact on parent experience, making long-term  
22  
23 109 integration into neonatal services challenging, while many others are using parent  
24  
25 110 questionnaires. ‘Parent satisfaction’ as an outcome is gaining momentum, as neonatal  
26  
27 111 trusts attempt to match more ‘business-like models’ where effectiveness of  
28  
29 112 interventions (and evidence for change) is measured by quantitative outcomes.  
30  
31 113 Moreover, where parent experience is measured as ‘parent satisfaction’, some studies  
32  
33 114 include it as a primary outcome, whereas others use it as a secondary indicator to  
34  
35 115 explore the parent point of view.  
36  
37  
38  
39  
40

41  
42 117 Furthermore, there are multiple experience measures available in addition to parent  
43  
44 118 satisfaction, including parent stress, anxiety and depression scales; both quantitative  
45  
46 119 and qualitative. Finally, it is not known the degree to which parents are involved in  
47  
48 120 the design of such interventions. There have been no previous systematic evaluations  
49  
50 121 focused on interventions measuring parent satisfaction with neonatal care as an  
51  
52 122 outcome.  
53  
54  
55

56 123

57  
58 124 The aim of this review is to identify and describe neonatal interventions relating to  
59  
60

1  
2  
3 125 parents of infants of all gestations where an outcome was parent satisfaction. For the  
4  
5 126 reasons outlined above, we have only included studies that reported  $\geq 1$  quantitative  
6  
7 127 measure of parent satisfaction. We aim to report each intervention's effect on parent  
8  
9 128 satisfaction, as well as parent input in intervention design.  
10  
11  
12

## 13 129 **METHODS**

14  
15  
16  
17 130 We prospectively registered this study on PROSPERO[10] (prospective register of  
18  
19 131 systematic reviews-CRD42017072388) and reported it using PRISMA  
20  
21 132 guidelines[11]. We searched MEDLINE (Medical Literature Analysis and Retrieval  
22  
23 133 System Online), EMBASE (Excerpta Medica database), PsychINFO (Psychological  
24  
25 134 Information), Cochrane Central Register of Controlled Trials, CINAHL  
26  
27 135 (CUMULATIVE Index to NURSING and Allied HEALTH LITERATURE), HMIC  
28  
29 136 (Health Management Information Consortium), Maternity and Infant Care (online\_  
30  
31 137 supplementaryFile1) for English papers published between 1946-October 2017, with  
32  
33 138 update searches on 1<sup>st</sup> September 2018.  
34  
35  
36  
37

38 139  
39  
40 140 Inclusion criteria were: randomised controlled trials (RCT) and non-randomised  
41  
42 141 studies (non-RCT) if participants were parents of infants receiving neonatal care,  
43  
44 142 interventions were implemented in neonatal units and  $\geq 1$  quantitative outcome of  
45  
46 143 parent satisfaction was measured. We have restricted our review to studies where  $\geq 1$   
47  
48 144 quantitative outcome of parent satisfaction was measured, in order to enable  
49  
50 145 comparison of interventions, which has previously not been possible in any published  
51  
52 146 review. Including studies with all available measures of parent experience (in  
53  
54 147 addition to parent satisfaction), as well as those only qualitatively evaluated, would  
55  
56 148 make any comparison very difficult. By using these pre-registered search criteria, we  
57  
58  
59  
60

1  
2  
3 149 also ensured we would capture studies measuring parent satisfaction both as primary  
4  
5 150 and as secondary outcomes. We included studies from all neonatal care level units  
6  
7  
8 151 and all healthcare settings, without excluding studies in low or middle-income  
9  
10 152 settings. This was because definitions of neonatal care levels differ between different  
11  
12 153 countries and healthcare settings, making them not easily comparable. Moreover,  
13  
14 154 different levels of care are found within the same hospital settings. We excluded  
15  
16 155 systematic reviews, entirely qualitative studies, grey literature (e.g. conference  
17  
18 156 abstracts), studies only reporting protocols or abstracts and full reports not in English.  
19  
20

21 157

22  
23  
24 158 Two authors (SS, IA) independently double-screened titles and abstracts, reviewed  
25  
26 159 full texts for eligibility and resolved any discrepancies with a third reviewer (JW).  
27  
28 160 We extracted data using a pilot-tested, standardised data extraction form including  
29  
30 161 study characteristics, interventions, outcomes and parent input into interventions’  
31  
32 162 design. We assessed methodological quality with the Cochrane Collaboration risk of  
33  
34 163 bias tool[12] for RCT and the ROBINS-I tool[13] for non-RCT.  
35  
36

37 164

38  
39  
40 165 We presented individual study aggregate data in a narrative synthesis, grouped  
41  
42 166 studies into themes using a Grounded Theory Approach[14] and planned meta-  
43  
44 167 analysis where data were appropriate for quantitative synthesis.  
45  
46

47 168

## 48 169 **Patient involvement**

49  
50  
51 170 This review was conceived in response to the clinical need identified by parents with  
52  
53 171 neonatal care experience; a partnership including families with experience of preterm  
54  
55 172 birth identified “what emotional and practical support improves attachment and  
56  
57 173 bonding, and does the provision of such support improve outcomes for premature  
58  
59  
60



1  
2  
3 174 babies and their families?” as a top 10 research priority[15]. Additionally, this review  
4  
5 175 was conceived as part of planning a wider project to pilot a neonatal intervention,  
6  
7 176 with parents’ full input. Patients were not directly involved in the design, conduct,  
8  
9  
10 177 reporting or dissemination plans of our research.  
11

12 178

13  
14  
15 179 **RESULTS**

16 180

17  
18  
19 181 We identified 8362 studies for screening and assessed 73 full text articles for  
20  
21 182 eligibility (Figure 1). A total of 32 studies describing interventions that measured  
22  
23 183 parent satisfaction in neonatal care as an outcome met the inclusion criteria, reporting  
24  
25 184 data from over 2866 parents, 1 study did not report number of parents. Our analysis  
26  
27 185 included 10 RCT and 22 non-RCT: 3 cohort trials, 18 unspecified designs and 1  
28  
29 186 implementation project. We classified the unspecified non-RCT into 2 types,  
30  
31 187 depending on how they defined their control groups and how they evaluated parent  
32  
33 188 satisfaction (eTable 1).  
34  
35  
36

- 37  
38 189 1. “*Unit- level effect*”: Studies that assessed parent satisfaction during a period  
39  
40 190 of routine care (control group) and introduced the intervention at a later time,  
41  
42 191 with a different group of parents. In these studies improvement in parent  
43  
44 192 satisfaction was evaluated between different parent groups, on a *unit level*.  
45  
46  
47 193 2. “*Group level effect*”: Studies that formed intervention and control groups  
48  
49 194 using convenience sampling during the same time period. Both groups (or  
50  
51 195 sometimes only the intervention group) had satisfaction measured after the  
52  
53 196 intervention period (post intervention testing). Baseline parent satisfaction  
54  
55 197 was also measured in both groups (pre intervention testing) in some studies.  
56  
57  
58 198 Improvement in parent satisfaction was demonstrated either by comparing  
59  
60

1  
2  
3 199 outcomes between intervention/control groups following the intervention, or  
4  
5 200 in comparison with the pre-intervention data.  
6  
7  
8 201

9  
10 202 Parent participants included mothers (14 studies), mothers and fathers (10 studies) or  
11  
12 203 were not specified (7 studies). One study defined parent participants as a dyad of the  
13  
14 204 mother with her designated support person. Median parent sample size was 63,  
15  
16 205 ranging 7-482. This was higher for RCT (108 studies) compared to non-RCT (61  
17  
18 206 studies).  
19  
20  
21 207

22  
23 208 Study participants included parents of babies across the full range of gestations (23-  
24  
25 209 42 weeks). Overall, 24/32 (75%) of studies involved preterm infants, 5/32 (16%)  
26  
27 210 term infants and 7 studies did not state the gestational age of infants involved. Most  
28  
29 211 studies (19, 59%) involved only preterm infants (up to 37 weeks); only 1 study (3%)  
30  
31 212 involved only term infants and 5 studies (16%) involved both preterm and term  
32  
33 213 infants. Preterm infants were included in 44% of RCT, versus 63% of non-RCT.  
34  
35  
36 214

37  
38 215 Most studies were reported as conducted in level III neonatal units (17 studies),  
39  
40 216 followed by level not stated (9 studies), level II-III (3 studies), level II (2 studies) and  
41  
42 217 level I (1 study). Definitions of neonatal levels of care are not standardised but vary  
43  
44 218 across different countries; none of the included studies have explicitly stated which  
45  
46 219 definition applies to them.  
47  
48  
49 220

50  
51 221 eTable 1 shows the key characteristics of included studies. eTable 1 includes a  
52  
53 222 description of each study's parent and infant sample, study design and intervention,  
54  
55  
56  
57  
58  
59  
60

223 outcome measures (timing and methods), results, parent input into intervention

224 design and study impact on parent satisfaction.

225

226 Parent satisfaction

227 Outcome measures: All 32 studies reported they measured parent satisfaction as an *a*  
228 *priori* outcome. Only one study confirmed this through a protocol. Overall 18/32  
229 (56%) of studies (4/10, 40% RCT and 14/22, 64% non-RCT) reported a higher level  
230 of parent satisfaction associated with the intervention studied. Multiple different  
231 outcome measures within the domain of parent satisfaction were used; we grouped  
232 these into 4 categories: i) Parent satisfaction (no additional description); ii) Parent  
233 satisfaction with NICU care; iii) Parent satisfaction related to specific components  
234 such as communication, staff or information; iv) Parent satisfaction with a specific  
235 intervention.

236

237 Timing of measurement: Parent satisfaction was mostly measured '*during infant*  
238 *admission only*' (24 studies; between 1-4 times), followed by '*after infant discharge*  
239 *only*' (5 studies; 1 time) and '*both during admission and after discharge*' (3 studies;  
240 between 1-3 times). In the majority of studies (19/32, 59%) no pre-intervention  
241 parent satisfaction measurements were conducted in the same parent groups with  
242 available post-intervention data (ie paired parent data for satisfaction levels did not  
243 exist). Instead, impact of interventions was determined comparing  
244 intervention/control group measurements in different time periods (eTable 1).

245

1  
2  
3 246 Method of measurement: Parent satisfaction was assessed using 32 different methods:  
4  
5 247 29 different questionnaires, 2 different single questions, and by structured interview  
6  
7  
8 248 in 1 study; in total 334 different questions were used to assess parent satisfaction.  
9  
10 249 Only 6/29 (21%) of questionnaires were reported to be fully validated (both content  
11  
12 250 validation and reliability testing); 23/29 (79%) questionnaires were partially or  
13  
14 251 completely unvalidated. The most commonly used questionnaire was the validated  
15  
16  
17 252 *Neonatal Index of Parent Satisfaction (NIPS)*[16] questionnaire (3 studies).  
18  
19  
20  
21  
22

23  
24 254 Interventions and impact on parent satisfaction  
25

26 255  
27 256 We grouped included studies into 5 intervention themes: parent involvement (14  
28  
29 257 studies); information provision/communication (8 studies); clinical care (7 studies);  
30  
31 258 parent emotional support (2 studies); other (1 study). Parent involvement  
32  
33 259 interventions were more commonly assessed in RCT compared to non-RCT .  
34  
35 260 We categorised interventions *as effective* or *not effective* based upon whether a  
36  
37 261 statistically significant difference between intervention and control groups was  
38  
39 262 reported for parent satisfaction (Table 1). None of the studies reported significantly  
40  
41 263 lower parent satisfaction in the intervention group compared to the control group. We  
42  
43 264 classified studies as *unclear if effective* if they included small sample numbers or if  
44  
45 265 statistical analysis was not performed. Finally, we highlighted studies where *only the*  
46  
47 266 *intervention group was assessed and only post-intervention*, where comparison to a  
48  
49 267 control group was not possible.  
50  
51  
52  
53  
54  
55

56 269 Overall, 18/32 studies (56%) reported higher parent satisfaction in the intervention  
57  
58 270 group; 4/10 RCT and 14/22 non-RCT. The intervention theme where higher  
59  
60

271 satisfaction was most consistently reported was parent involvement (10/14 studies).

272 Due to the large heterogeneity of outcome measure scales a quantitative synthesis and

273 meta-analysis was not possible.

## 1. Parent involvement

## Outcome

|                                                                                                                                              |                      |
|----------------------------------------------------------------------------------------------------------------------------------------------|----------------------|
| 13 More NICU access, parents on WRs, Education (De Bernardo et al, Italy, 2017)                                                              | Effective            |
| 16 More NICU access, care involvement, education (Bastani et al, Iran, 2015) <b>RCT</b>                                                      | Effective            |
| 18 Newborn Individualised Developmental Care and Assessment Program (NIDCAP)<br>19 (Wielenga et al, Netherlands, 2006)                       | Effective            |
| 21 Kangaroo care (Legault and Goulet, Canada, 1995)                                                                                          | Effective            |
| 23 Rooming-in care (Kazemian et al, Iran, 2016)                                                                                              | Effective            |
| 25 Single-family NICU rooms (Stevens et al, USA, 2011)                                                                                       | Effective            |
| 27 Parental Presence at Clinical Bedside Rounds (Abdel-Latif et al, Australia, 2015) <b>RCT</b>                                              | Effective            |
| 29 Family-centered rounds (Voos et al, USA, 2011)                                                                                            | Effective            |
| 31 Infant Progress Charts filled by parents and 3 Care Planning Meetings<br>32 (Penticuff and Arheart. USA, 2005)                            | Effective            |
| 34 Education re: pain management (Franck et al, UK, 2011) <b>RCT</b>                                                                         | Effective            |
| 36 Open Unit policy: 24/7 NICU access (Voos and Park, USA, 2014)                                                                             | Unclear if effective |
| 38 Touch and massage for 7 days (Livingston et al, USA, 2009) <b>RCT</b>                                                                     | Unclear if effective |
| 40 a. Massage with auditory, tactile, visual, and vestibular stimulation<br>41 b. Kangaroo care (Holditch-Davis et al, USA, 2013) <b>RCT</b> | Not effective        |
| 43 Individualised, developmentally supportive family-centered care interventions<br>44 (Byers et al, USA, 2006)                              | Not effective        |

274

## 2. Information provision / communication

## Outcome

|                                                                                                                        |           |
|------------------------------------------------------------------------------------------------------------------------|-----------|
| 51 Internet-based education (Kadivar et al, Iran, 2017)                                                                | Effective |
| 53 Daily SMS from Electronic Patient Record (Globus et al, Israel, 2016)                                               | Effective |
| 55 Staff education, staff contact card given to parents, staff poster at NICU reception<br>56 (Weiss et al, USA, 2010) | Effective |
| 57 Provision of taped conversations with neonatologists to mothers<br>58 (Koh et al, Australia, 2007) <b>RCT</b>       | Effective |

1  
2  
3  
4  
5  
6  
7  
8  
9  
10  
11  
12  
13  
14  
15  
16  
17  
18  
19  
20  
21  
22  
23  
24  
25  
26  
27  
28  
29  
30  
31  
32  
33  
34  
35  
36  
37  
38  
39  
40  
41  
42  
43  
44  
45  
46  
47  
48  
49  
50  
51  
52  
53  
54  
55  
56  
57  
58  
59  
60

|                                                                                                                                 |                                                                     |
|---------------------------------------------------------------------------------------------------------------------------------|---------------------------------------------------------------------|
| Clinical staff enter updates in baby diary (Van de Vijver and Evans, UK, 2015)                                                  | Unclear if effective                                                |
| Detailed information provided during consenting (Broyles et al, USA, 1992) <b>RCT</b>                                           | Unclear if effective                                                |
| Sharing information obtained from parent interviews with the primary NICU provider (Clarke-Pounder et al, USA, 2015) <b>RCT</b> | Not effective                                                       |
| Daily parent update letter from Electronic Patient Record (Palma et al, USA, 2012)                                              | Only the intervention group was assessed and only post-intervention |

275

**3. Clinical care** **Outcome**

|                                                                                                              |                      |
|--------------------------------------------------------------------------------------------------------------|----------------------|
| Headbox oxygen for respiratory distress                                                                      | Effective            |
| CPAP for respiratory distress (Foster et al, Australia, 2008)                                                | Effective            |
| Co-bedding infants in incubators (prospective) (Byers et al, USA, 2003)                                      | Effective            |
| Co-bedding infants in incubators (retrospective) (Polizzi et al, USA, 2003)                                  | Effective            |
| Palliative care (Petteys et al, USA, 2015)                                                                   | Unclear if effective |
| Five potentially better practices in the area of discharge planning (Mills et al, USA, 2006)                 | Unclear if effective |
| Clinical Nurse Specialist/ neonatal practitioner team care (Mitchell-DiCenso et al, Canada, 1996) <b>RCT</b> | Not effective        |

**4. Parent emotional support** **Outcome**

|                                                                        |                                                                     |
|------------------------------------------------------------------------|---------------------------------------------------------------------|
| Narrative writing (Kadivar et al, Iran, 2017)                          | Effective                                                           |
| Listening visits (Segre et al, USA, 2013)                              | Only the intervention group was assessed and only post-intervention |
| Tele-rounding robot, off-site neonatologist (Garingo et al, USA, 2016) | Only the intervention group was assessed and only post-intervention |

**5. Other** **Outcome**

|                                                     |               |
|-----------------------------------------------------|---------------|
| Free Parking (Northrup et al, USA, 2016) <b>RCT</b> | Not effective |
|-----------------------------------------------------|---------------|

276

277 **Table 1.** Interventions in themes

1  
2  
3 278 Legend: *The colours illustrate each intervention's reported effect on parent*  
4  
5 279 *satisfaction. Green (intervention effective): Parent satisfaction was reported to be*  
6  
7 280 *statistically significantly higher in the intervention group; Red (intervention not*  
8  
9 281 *effective): Parent satisfaction was not reported to be statistically significantly*  
10  
11 282 *different in the intervention group; Yellow (unclear if effective): Small study numbers*  
12  
13 283 *and/or no statistical analysis performed); Grey (Only the intervention group was*  
14  
15 284 *assessed and only post-intervention). **RCT: Randomised Controlled Trial***  
16  
17  
18  
19  
20

21  
22  
23  
24  
25  
26  
27  
28  
29  
30  
31  
32  
33  
34  
35  
36  
37  
38  
39  
40  
41  
42  
43  
44  
45  
46  
47  
48  
49  
50  
51  
52  
53  
54  
55  
56  
57  
58  
59  
60

### 286 Parent input into design of interventions

287

288 Five studies (5/32, 16%) reported involving parents in intervention design, of which 2  
289 reported improvement of parent satisfaction. The number of included studies was too  
290 small to estimate any effect of parent co-design on the success of interventions at  
291 study level.

292

### 293 Methodological quality

294

295 For the majority of RCT, key study characteristics, such as randomisation, allocation  
296 concealment and blinding of outcome assessment, were either not stated or unclear  
297 (Figure 2). Only one RCT had an available study protocol (retrospectively registered)  
298 and none described blinding of study participants and/or personnel. All RCT scored a  
299 high/unclear risk of bias in at least 4/6 Cochrane tool categories, except for one,  
300 which scored a high/unclear risk in 3/6 categories.

301

1  
2  
3 302 We assessed 21/22 non-RCT studies using the ROBINS-I tool (13), excluding the  
4  
5 303 implementation project. All 21 studies were assessed as having an overall *serious* risk  
6  
7 304 of bias and 7/21 of studies (33%) were further categorised as having *critical* risk of  
8  
9 305 bias (Figure 3). Blinding of participants, personnel and outcome assessment was  
10  
11 306 poorly reported across all non-RCT and no study reported a published study protocol.  
12  
13 307 None of the included non-RCT measured or corrected for important parent/infant  
14  
15 308 confounding variables, or other relevant neonatal unit co-interventions taking place at  
16  
17 309 the same time as the intervention.  
18  
19  
20  
21  
22

23 310  
24 311 We were unable to use the *Standards for Reporting Implementation Studies (StaRI)*  
25  
26 312 *Statement Tool*[17] for assessing the implementation project, as the reporting was  
27  
28 313 incomplete.  
29  
30  
31

32 314  
33 315 There was no association between methodological quality assessments and the  
34  
35 316 studies' reported effect on parent satisfaction. All 4/10 RCT that reported a higher  
36  
37 317 level of parent satisfaction associated with their intervention, scored a high/unclear  
38  
39 318 risk of bias in at least 4/6 Cochrane tool categories, one of which scored high/unclear  
40  
41 319 *risk* in all categories. Out of the 14/22 non-RCT reporting an improved parent  
42  
43 320 satisfaction, two were deemed to be at *critical risk* of bias on the ROBINS- I tool,  
44  
45 321 whilst the rest we assessed to be at *serious risk* of bias.  
46  
47  
48

49 322

## 51 323 **DISCUSSION**

52 324

53  
54  
55  
56 325 Parent satisfaction with neonatal care is increasingly recognised as an important  
57  
58 326 measure of parent experience and is being used to evaluate hospitals and healthcare  
59  
60



1  
2  
3 327 providers; use of interventions to improve parent satisfaction in neonatal units is  
4  
5 328 increasing. This is the largest review of interventions where an outcome was parent  
6  
7 329 satisfaction with neonatal care and includes 32 studies. We find low quality evidence  
8  
9  
10 330 that interventions targeting ‘parent involvement’ may improve parent satisfaction  
11  
12 331 with neonatal care, but this result must be interpreted cautiously in view of the high  
13  
14 332 risk of bias in included studies.  
15

16  
17 333

18  
19 334 Overall, our review highlights the complexity of evaluating parent satisfaction. As a  
20  
21 335 multidimensional construct, parent satisfaction can be affected just as much by  
22  
23 336 interventions directly relating to infant care (eg. Kangaroo care) as well as  
24  
25 337 interventions relating to neonatal care facilities (eg. Free parking). By grouping  
26  
27 338 included interventions into themes (Table 1) we have highlighted the variety of  
28  
29 339 interventions available, as well as the majority of interventions being those relating to  
30  
31 340 ‘parent involvement’.  
32  
33

34  
35 341

36  
37 342 A key reason for only selecting parent satisfaction as the outcome of interest was to  
38  
39 343 focus on a single component of parent experience, in order to reduce outcome  
40  
41 344 heterogeneity and allow direct comparison. Despite this approach, the key  
42  
43 345 methodological limitation identified in this review was inconsistency in how parent  
44  
45 346 satisfaction is defined and measured; it is notable that the majority of questionnaires  
46  
47 347 (23/29) lack validation. In keeping with neonatal studies more widely[18], this study  
48  
49 348 confirms inconsistent outcome selection as a major source of research waste in  
50  
51 349 neonatal studies examining parent experience, and further finds that there is limited  
52  
53 350 involvement of parents in study design.  
54  
55

56  
57 351  
58  
59  
60

1  
2  
3 352 Strengths of our review include identifying studies with both mother and father  
4  
5 353 participants, inclusion of the full range of infant gestations and a wide range of  
6  
7 354 interventions. We followed a pre-registered protocol and report this review in line  
8  
9 355 with PRISMA guidelines[11]. To further aid direct comparison of interventions, we  
10  
11 356 only included studies that evaluated parent experience using  $\geq 1$  quantitative outcome  
12  
13 357 of parent satisfaction. One limitation of this approach is that by excluding studies  
14  
15 358 which evaluated parent experience using other measures (e.g. stress, anxiety and  
16  
17 359 depressions scales) we are unable to comment on interventions that targeted these  
18  
19 360 other components of parent experience.  
20  
21  
22  
23  
24  
25

26 362 Another limitation is that we have only included studies in the English language, due  
27  
28 363 to resource and time constraints. By not including studies in other languages, it is  
29  
30 364 possible our results are more focused on work conducted in specific countries.  
31  
32 365 Furthermore, we acknowledge that much of the research in parent experience is  
33  
34 366 qualitatively evaluated. By restricting our review to studies where  $\geq 1$  quantitative  
35  
36 367 outcome of parent satisfaction is measured, we have not included any interventions  
37  
38 368 with solely qualitative outcomes. This was in an attempt to enable direct comparison  
39  
40 369 of interventions, which has previously not been possible in any published review. By  
41  
42 370 not including studies evaluated by qualitative measures only, it is possible our results  
43  
44 371 are more focused on a particular type of interventions where quantitative evaluation  
45  
46 372 would be preferable and/or easier. It also means we may not have included all studies  
47  
48 373 ever conducted on a particular intervention, where some were only evaluated  
49  
50 374 qualitatively, making some interventions appear more 'widespread' than others.  
51  
52  
53  
54  
55

56 375  
57  
58  
59  
60

1  
2  
3 376 Brett et al[19] systematically reviewed interventions aimed at improving the parent  
4  
5 377 experience more widely, but only included parents of preterm infants. Their large  
6  
7 378 number of outcome domains and heterogeneity of outcome measures (including  
8  
9 379 studies that reported only qualitative outcomes) meant the authors were unable to draw  
10  
11 380 firm conclusions about the efficacy of interventions and that comparison and meta-  
12  
13 381 analysis was not possible. The majority of our review's studies have been published  
14  
15 382 in the 7 years since the Brett review, highlighting the increasing interest in this area.  
16  
17 383 However, despite including all gestations and focusing on a specific aspect of parent  
18  
19 384 experience, heterogeneity in measurement of parent satisfaction meant we were also  
20  
21 385 unable to conduct a quantitative synthesis. Inconsistency and lack of validation of  
22  
23 386 instruments measuring parent satisfaction in neonatal care (specifically with family-  
24  
25 387 centred care) has previously been highlighted by Dall'Oglio et al[20].  
26  
27 388  
28  
29 389 Although 31% of included studies were RCT, all were assessed as having a high risk  
30  
31 390 of bias. Randomised controlled trials are traditionally considered the highest-ranking  
32  
33 391 form of evidence, however it is worth considering whether such a design is feasible  
34  
35 392 or desirable to evaluate interventions targeting parent satisfaction. Parents in neonatal  
36  
37 393 care talk to each other, compare notes and invariably create parent-support  
38  
39 394 communities; hence it is inherently difficult to avoid contamination between parents  
40  
41 395 receiving an intervention and those who are not, meaning that blinding of parents or  
42  
43 396 health professionals is near impossible. Furthermore, parent satisfaction is likely to  
44  
45 397 be particularly susceptible to the Hawthorne effect[21], requiring longer-term follow  
46  
47 398 up. These factors may explain the low number of RCT identified in our review and  
48  
49 399 the high risk of bias seen in those that were included. In non-RCT studies, the main  
50  
51 400 methodological concern is the degree to which unmeasured and uncontrolled  
52  
53  
54  
55  
56  
57  
58  
59  
60

1  
2  
3 401 confounders may explain any differences seen between groups. The non-RCT studies  
4  
5 402 included in this review were classed as having either a serious or critical risk of bias.  
6  
7 403 The overwhelming majority of studies did not adequately report baseline variables or  
8  
9 404 report other interventions during the study period, making it impossible to assess  
10  
11 405 studies for selection bias or treatment bias. Furthermore, limitations such as  
12  
13 406 contamination bias and the Hawthorne effect affect non-RCT as well. Only two non-  
14  
15 407 RCT studies evaluated the outcome of interest (parent satisfaction) both before and  
16  
17 408 after the intervention, in the same group of parents (*group level effect*), with most  
18  
19 409 studies evaluating different parent groups pre and post intervention (*unit level effect*).  
20  
21 410 An inherent weakness of this latter approach is that it assumes parent satisfaction is a  
22  
23 411 static measure at the unit level, which is unlikely to be true. As a result of these  
24  
25 412 numerous important limitations identified across all included studies, we find only  
26  
27 413 low-quality evidence in support of interventions to improve parent satisfaction with  
28  
29 414 neonatal care, despite a majority of studies reporting a beneficial effect of  
30  
31 415 interventions. These limitations may explain the limited uptake of these interventions  
32  
33 416 by the wider neonatal community.  
34  
35 417  
36  
37 418 Changing neonatal unit practices to incorporate any new intervention requires robust  
38  
39 419 evidence. We demonstrate here that such evidence is not currently available for  
40  
41 420 improving parent satisfaction. We highlight the use of non-randomised study designs,  
42  
43 421 inconsistency in definition and measurement of parent satisfaction, the use of  
44  
45 422 unvalidated questionnaires, methodological limitations and a lack of parent  
46  
47 423 involvement as contributors. Our review empirically documents the extent of these  
48  
49 424 issues in studies that use quantitative parent satisfaction surveys, and their  
50  
51 425 contribution to research waste in neonatology.  
52  
53  
54  
55  
56  
57  
58  
59  
60

1  
2  
3 426  
4

5 427 Given the importance of parent satisfaction for both parent and offspring wellbeing,  
6  
7  
8 428 higher quality trials that involve parents, use standardised definitions and validated  
9  
10 429 parent satisfaction measures are needed. Given the nature and challenges of the  
11  
12 430 neonatal care environment and the limitations we have identified in existing research,  
13  
14 431 a cluster trial may be the most appropriate study design to rigorously evaluate  
15  
16  
17 432 interventions to improve parent satisfaction with neonatal care.  
18

19 433  
20

## 21 434 **CONCLUSIONS**

22  
23  
24 435 Many interventions, commonly relating to parent involvement, are reported to  
25  
26 436 improve parent satisfaction with neonatal care but inconsistency in definition and  
27  
28 437 measurement of parent satisfaction and high risk of bias in all studies makes this low  
29  
30  
31 438 quality evidence. Standardised definitions and validated parent satisfaction measures  
32  
33 439 are needed, as well as higher quality trials of parent experience, involving parents in  
34  
35 440 intervention design.  
36

37 441  
38

### 39 442 **What is already known on this topic**

- 40  
41  
42 443 • Neonatal care significantly affects parents' mental health; parent  
43  
44 444 satisfaction is increasingly being used as a parent experience measure  
45  
46  
47 445 • Parent satisfaction is inversely related to parent stress; interventions  
48  
49 446 improving parent satisfaction have the potential to reduce parent stress,  
50  
51 447 improve parent-infant bonding and infant outcomes  
52  
53  
54 448 • Use of interventions measuring parent satisfaction as an outcome in  
55  
56 449 neonatal units is increasing, though few are formally evaluated and wider  
57  
58  
59  
60

1  
2  
3 450 uptake is limited; it is not known the degree to which parents are involved in  
4  
5 451 intervention design  
6  
7  
8 452

9  
10 453 **What this study adds**

- 11  
12 454 • There is inconsistency in how parent satisfaction in neonatal care is  
13  
14 455 defined and measured, and the majority of studies do not include parents in  
15  
16 456 intervention design  
17  
18 457 • There is low quality evidence that interventions relating to parent  
19  
20 458 involvement may improve parent satisfaction with neonatal care  
21  
22 459 • Standardised, validated measures of parent satisfaction and higher  
23  
24 460 quality trials, involving parents in intervention design, are needed  
25  
26  
27  
28  
29 461

30  
31 462 **DECLARATIONS**

32  
33 463

34  
35 464 **Conflict of interest disclosure**

36  
37 465 SS has received research grants from the National Institute of Health Research  
38  
39 466 (NIHR), the NIHR CLAHRC NWL, Rosetrees Trust and CW+ charity. NM is  
40  
41 467 Director of the Neonatal Data Analysis Unit at Imperial College London. In the last  
42  
43 468 five years NM has served on the Board of Trustees of the Royal College of  
44  
45 469 Paediatrics and Child Health, David Harvey Trust, Medical Women's Federation and  
46  
47 470 Medact; and is a member of the Nestle Scientific Advisory Board. NM has received  
48  
49 471 research grants from the British Heart Foundation, Medical Research  
50  
51 472 Council, National Institute of Health Research, Westminster Research Fund,  
52  
53 473 Collaboration for Leadership in Applied Health and Care Northwest London,  
54  
55 474 Healthcare Quality Improvement Partnership, Bliss, Prolacta Life Sciences, Chiesi,

1  
2  
3 475 Shire and HCA International; travel and accommodation expenses from, Nutricia,  
4  
5 476 Prolacta, Nestle and Chiesi; honoraria from Ferring Pharmaceuticals and Alexion  
6  
7 477 Pharmaceuticals for contributions to expert advisory boards, and Chiesi for  
8  
9  
10 478 contributing to a lecture programme. CG is funded by the United Kingdom Medical  
11  
12 479 Research Council (MRC) through a Clinician Scientist Fellowship award. He has  
13  
14 480 received support from Chiesi Pharmaceuticals to attend an educational conference; in  
15  
16  
17 481 the past 5 years he has been investigator on received research grants from Medical  
18  
19 482 Research Council, National Institute of Health Research, Canadian Institute of Health  
20  
21 483 Research, Department of Health in England, Mason Medical Research Foundation,  
22  
23 484 Westminster Medical School Research Trust and Chiesi Pharmaceuticals. IA, JW,  
24  
25  
26 485 DB: None to declare.  
27  
28  
29

486

#### 487 **Authors' contributions**

30  
31  
32  
33 488 SS and CG conceived this systematic review. The protocol was created by SS and  
34  
35 489 CG. Searches were performed by SS and IA. All search results were reviewed by  
36  
37 490 SS, and JW. Coding was completed by SS and JW. Data analysis was completed by  
38  
39 491 SS. The first draft of the manuscript was written by SS; SS, CG and JW edited and  
40  
41  
42 492 reviewed the manuscript. All authors approved the manuscript. This article presents  
43  
44 493 independent research supported by the National Institute for Health Research (NIHR)  
45  
46  
47 494 The views expressed in this publication are those of the authors and not necessarily  
48  
49 495 those of the NHS, the NIHR or the Department of Health and Social Care.  
50  
51

496

#### 497 **Funding**

52  
53  
54 498 This work is sponsored by Imperial College London and supported by a peer-  
55  
56 499 reviewed National Institute of Health Research Doctoral Research Fellowship,  
57  
58  
59  
60

1  
2  
3 500 awarded to SS (DRF-2017-10-172).  
4

5 501  
6

7 502 **References**  
8

- 9  
10 503 1. Neonatal Data Analysis Unit. Neonatal Data Analysis Unit Annual Report  
11  
12 504 2017, 2018. Available: [https://www.rcpch.ac.uk/sites/default/files/2018-](https://www.rcpch.ac.uk/sites/default/files/2018-10/2018_nnap_report_on_2017_data_final_v8.pdf)  
13  
14 505 [10/2018\\_nnap\\_report\\_on\\_2017\\_data\\_final\\_v8.pdf](https://www.rcpch.ac.uk/sites/default/files/2018-10/2018_nnap_report_on_2017_data_final_v8.pdf)  
15  
16 506 2. Lefkowitz DS, Baxt C, Evans JR. Prevalence and Correlates of Posttraumatic  
17  
18 507 Stress and Postpartum Depression in Parents of Infants in the Neonatal Intensive Care  
19  
20 508 Unit (NICU). *J Clin Psychol Med Settings* 2010;17(3):230-7.  
21  
22 509 3. Shaw RJ, Bernard RS, DeBlois T et al. The Relationship Between Acute  
23  
24 510 Stress Disorder and Posttraumatic Stress Disorder in the Neonatal Intensive Care  
25  
26 511 Unit. *Psychosomatics* 2009;50(2):131-7.  
27  
28 512 4. Beck CT, Woynar J. Posttraumatic Stress in Mothers While Their Preterm  
29  
30 513 Infants Are in the Newborn Intensive Care Unit: A Mixed Research Synthesis. *ANS*  
31  
32 514 *Adv Nurs Sci* 2017;40(4):337-55.  
33  
34 515 5. Lee SK, O'Brien K. Parents as primary caregivers in the neonatal intensive  
35  
36 516 care unit. *CMAJ* 2014;186(11):845-7.  
37  
38 517 6. Grace SL, Evindar A, Stewart DE. The effect of postpartum depression on  
39  
40 518 child cognitive development and behavior: a review and critical analysis of the  
41  
42 519 literature. *Arch Womens Ment Health* 2003;6(4):263-74.  
43  
44 520 7. Rocha G, Candeias L, Ramos M et al. Stress and satisfaction of mothers in  
45  
46 521 neonatal intensive care. *Acta Med Port* 2011;24(2):157-66.  
47  
48 522 8. Lopez-Maestro M, Sierra-Garcia P, Diaz-Gonzalez C et al. Quality of  
49  
50 523 attachment in infants less than 1500g or less than 32 weeks. Related factors. *Early*  
51  
52 524 *Hum Dev* 2016;104:1-6.  
53  
54  
55  
56  
57  
58  
59  
60



- 1  
2  
3 525 9. Charpak N, Tessier R, Ruiz JG et al. Twenty-year Follow-up of Kangaroo  
4  
5 526 Mother Care Versus Traditional Care. *Pediatrics* 2017;139(1):e20162063.  
6  
7 527 10. PROSPERO database. Available:  
8  
9 528 [http://www.crd.york.ac.uk/prospero/display\\_record.asp?ID=CRD42016042110](http://www.crd.york.ac.uk/prospero/display_record.asp?ID=CRD42016042110)  
10  
11 529 11. Moher D, Liberati A, Tetzlaff J et al. Preferred reporting items for systematic  
12  
13 530 reviews and meta-analyses: the PRISMA statement. *J Clin Epidemiol*  
14  
15 531 2009;62(10):1006-12.  
16  
17 532 12. Higgins JP, Altman DG, Gotzsche PC et al. The Cochrane collaboration's tool  
18  
19 533 for assessing risk of bias in randomised trials. *BMJ* 2011;343:d5928.  
20  
21 534 13. Sterne JA, Hernan MA, Reeves BC et al. ROBINS-I: a tool for assessing risk  
22  
23 535 of bias in non-randomised studies of interventions *BMJ* 2016;355:i4919.  
24  
25 536 14. Green JTN. *Qualitative Methods for Health Research*. SAGE, 2014.  
26  
27 537 15. Duley L, Uhm S, Oliver S et al. Top 15 UK Research Priorities for Preterm  
28  
29 538 Birth. *The Lancet* 2014;383(9934):2041-2042.  
30  
31 539 16. Mitchell-DiCenso A, Guyatt G, Paes B et al. A new measure of parent  
32  
33 540 satisfaction with medical care provided in the neonatal intensive care unit. *J Clin*  
34  
35 541 *Epidemiol* 1996;49(3):313-318.  
36  
37 542 17. Pinnock H, Barwick M, Carpenter C et al. Standards for Reporting  
38  
39 543 Implementation Studies (StaRI) statement. *BMJ* 2017;356:i6795.  
40  
41 544 18. Webbe JWH, Ali S, Sakonidou S et al, Inconsistent outcome reporting in  
42  
43 545 large neonatal trials: a systematic review, *Arch Dis Child Fetal Neonatal Ed* 2019  
44  
45 546 doi: 10.1136/archdischild-2019-316823. [Epub ahead of print]  
46  
47 547 19. Brett J, Staniszewska S, Newburn M et al. A systematic mapping review of  
48  
49 548 effective interventions for communicating with, supporting and providing  
50  
51 549 information to parents of preterm infants. *BMJ Open* 2011;1(1):e000023.  
52  
53  
54  
55  
56  
57  
58  
59  
60

550 20. Dall'Oglio I, Mascolo R, Gawronski O et al. A systematic review of  
 551 instruments for assessing parent satisfaction with family-centred care in neonatal  
 552 intensive care units. *Acta Paediatr* 2018;107:391-402.

553 21. McCambridge J, Witton J, Elbourne DR. Systematic review of the  
 554 Hawthorne effect: new concepts are needed to study research participation effects. *J*  
 555 *Clin Epidemiol* 2014;67(3):267–277.

## 557 **Figure / Table Legends**

559 **Figure 1:** PRISMA Flow diagram of selected studies

560 **Figure 2.** Cochrane Collaboration Risk of Bias tool assessment (RCT)

561 Legend: Green- low risk of bias; Yellow- unclear risk of bias; Red- high risk of bias

562 **Figure 3.** ROBINS-I risk of bias assessment (Non-RCT)

564 **Table 1.** Interventions in themes

565 Legend: *The colours illustrate each intervention's reported effect on parent*  
 566 *satisfaction. Green (intervention effective): Parent satisfaction was reported to be*  
 567 *statistically significantly higher in the intervention group; Red (intervention not*  
 568 *effective): Parent satisfaction was not reported to be statistically significantly*  
 569 *different in the intervention group; Yellow (unclear if effective): Small study numbers*  
 570 *and/or no statistical analysis performed); Grey (Only the intervention group was*  
 571 *assessed and only post-intervention). **RCT:** Randomised Controlled Trial*

## 573 **Online supplementary files**

574 **File 1.** OVID MEDLINE search strategy

1  
2  
3 575 **eTable 1.** Included studies by study design- Randomised controlled trials (RCT) and  
4  
5 576 non-RCT

6  
7  
8 577 Legend: *Number in last column illustrates each intervention's reported effect on*  
9  
10 578 *parent satisfaction: 1. Parent satisfaction was statistically significantly higher in the*  
11  
12 579 *intervention group; 2. Parent satisfaction was not reported to be statistically*  
13  
14 580 *significantly different in the intervention group; 3. Unclear if parent satisfaction*  
15  
16 581 *improved (small study numbers and/or no statistical analysis performed); 4. Only the*  
17  
18 582 *intervention group was assessed and only post-intervention*

19  
20  
21 583

22  
23  
24 584

25  
26 585 **Research checklist**

27  
28 586 PRISMA checklist

29  
30  
31 587  
32  
33  
34  
35  
36  
37  
38  
39  
40  
41  
42  
43  
44  
45  
46  
47  
48  
49  
50  
51  
52  
53  
54  
55  
56  
57  
58  
59  
60

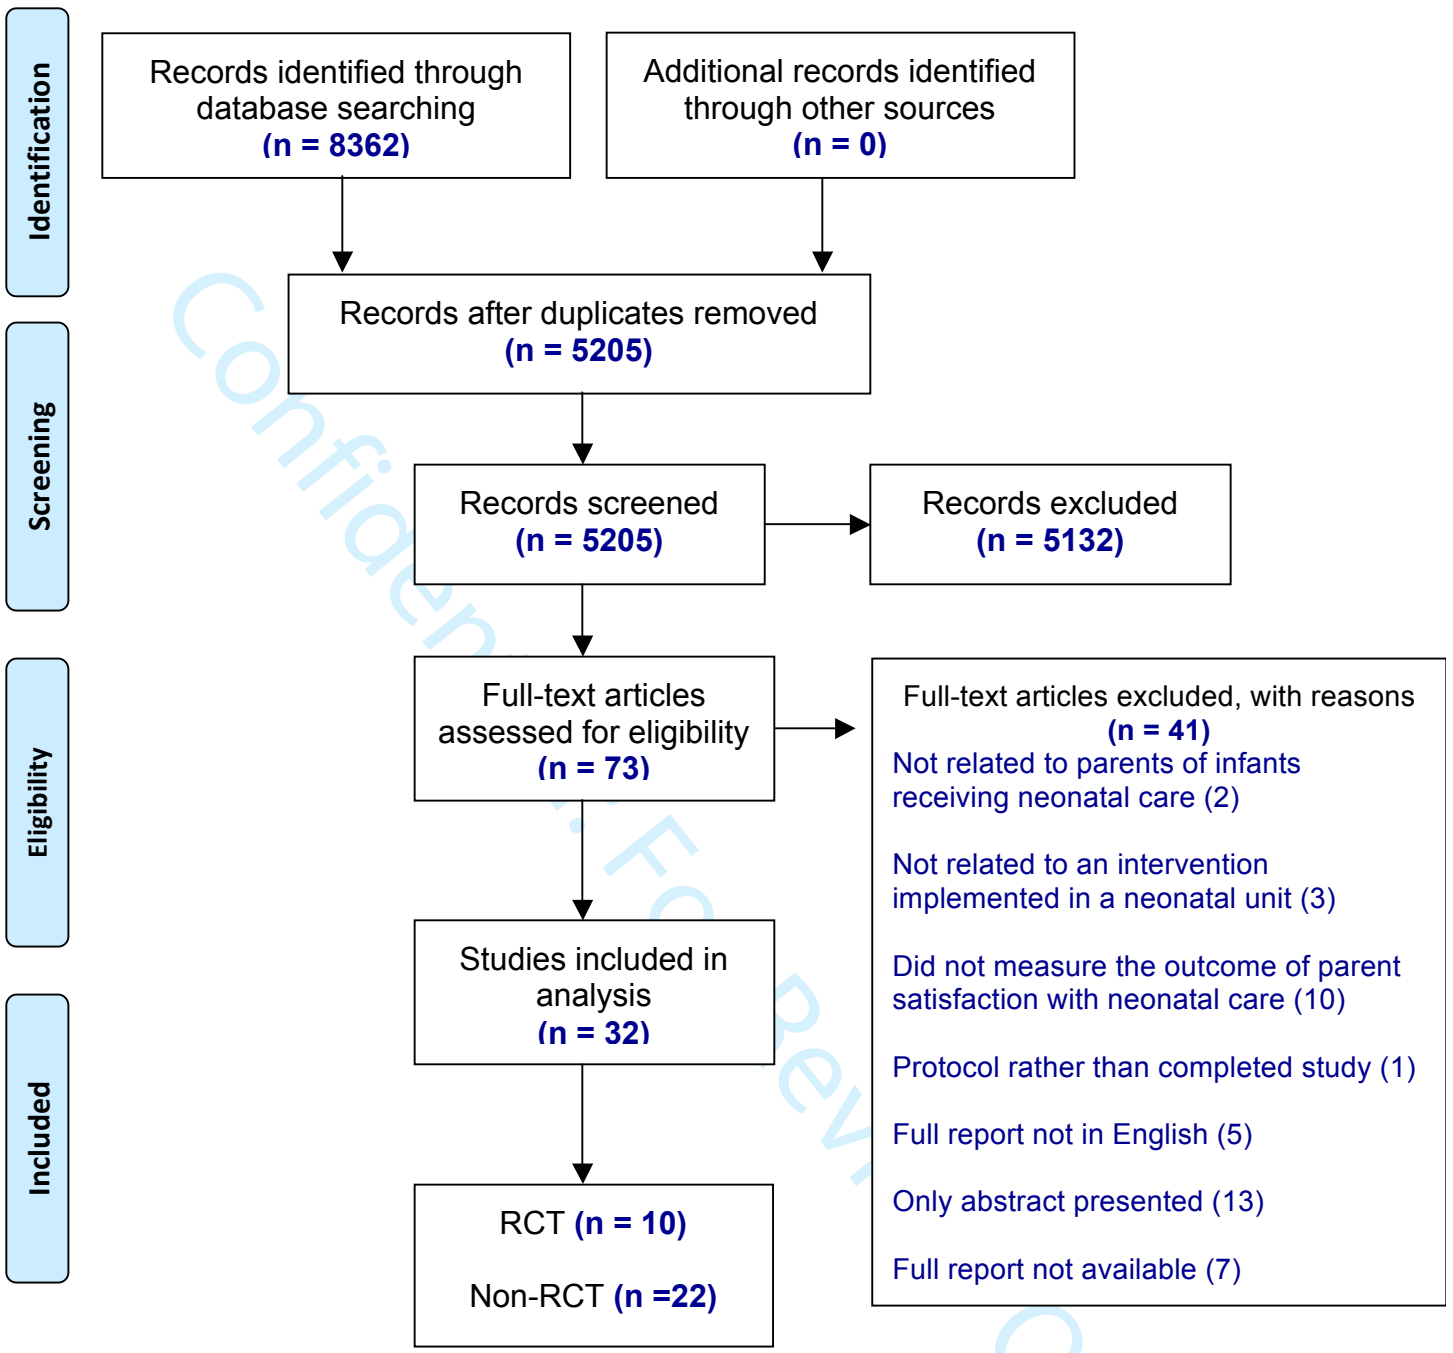

## Risk of Bias (Cochrane)

| Author<br>by publication year | Random<br>sequence<br>generation | Allocation<br>concealment | Blinding of<br>participants<br>and<br>personnel | Blinding of<br>outcome<br>assessment | Incomplete outcome data | Selective<br>reporting |
|-------------------------------|----------------------------------|---------------------------|-------------------------------------------------|--------------------------------------|-------------------------|------------------------|
| 1. Northrup (2016)            | ?                                | +                         | -                                               | ?                                    | +                       | ?                      |
| 2. Abdel-Latif<br>(2015)      | +                                | +                         | -                                               | -                                    | -                       | ?                      |
| 3. Bastani (2015)             | ?                                | ?                         | -                                               | ?                                    | +                       | ?                      |
| 4. Clarke-Pounder<br>(2015)   | ?                                | ?                         | -                                               | ?                                    | +                       | ?                      |
| 5. Holditch-Davis<br>(2013)   | +                                | +                         | -                                               | +                                    | ?                       | ?                      |
| 6. Franck (2011)              | -                                | ?                         | -                                               | ?                                    | -                       | +                      |
| 7. Livingston (2009)          | ?                                | ?                         | -                                               | ?                                    | +                       | ?                      |
| 8. Koh (2007)                 | ?                                | ?                         | -                                               | ?                                    | ?                       | ?                      |
| 9. Mitchell-DiCenso<br>(1996) | +                                | ?                         | ?                                               | ?                                    | ?                       | ?                      |
| 10. Broyles (1992)            | ?                                | ?                         | -                                               | +                                    | +                       | ?                      |



1  
2  
3  
4  
5  
6  
7  
8  
9  
10  
11  
12  
13  
14  
15  
16  
17  
18  
19  
20  
21  
22  
23  
24  
25  
26  
27  
28  
29  
30  
31  
32  
33  
34  
35  
36  
37  
38  
39  
40  
41  
42  
43  
44  
45  
46  
47

# Risk of Bias (ROBINS-I)

| Author<br>by publication<br>year                     | Bias due to<br>confounding | Bias in<br>selection of<br>participants<br>into the<br>study | Bias in<br>classification<br>of<br>interventions | Bias due to<br>deviations<br>from<br>intended<br>interventions | Bias due to<br>missing<br>data | Bias in<br>measurement<br>of outcomes | Bias in<br>selection of<br>the<br>reported<br>result | OVERALL<br>risk of bias |
|------------------------------------------------------|----------------------------|--------------------------------------------------------------|--------------------------------------------------|----------------------------------------------------------------|--------------------------------|---------------------------------------|------------------------------------------------------|-------------------------|
| 1. De Bernardo (2017)                                | SERIOUS                    | LOW                                                          | LOW                                              | SERIOUS                                                        | LOW                            | SERIOUS                               | SERIOUS                                              | SERIOUS                 |
| 2. Kadivar (2017)<br><i>Internet-based education</i> | SERIOUS                    | LOW                                                          | LOW                                              | SERIOUS                                                        | LOW                            | SERIOUS                               | MODERATE                                             | SERIOUS                 |
| 3. Kadivar (2017)<br><i>Narrative writing</i>        | SERIOUS                    | SERIOUS                                                      | LOW                                              | SERIOUS                                                        | LOW                            | SERIOUS                               | MODERATE                                             | SERIOUS                 |
| 4. Garingo (2016)                                    | CRITICAL                   | LOW                                                          | LOW                                              | SERIOUS                                                        | SERIOUS                        | SERIOUS                               | SERIOUS                                              | CRITICAL                |
| 5. Globus (2016)                                     | SERIOUS                    | LOW                                                          | LOW                                              | NO INFO                                                        | SERIOUS                        | SERIOUS                               | SERIOUS                                              | SERIOUS                 |
| 6. Kazemian (2016)                                   | SERIOUS                    | NO INFO                                                      | LOW                                              | SERIOUS                                                        | NO INFO                        | SERIOUS                               | SERIOUS                                              | SERIOUS                 |
| 7. Petteys (2015)                                    | SERIOUS                    | LOW                                                          | LOW                                              | SERIOUS                                                        | MODERATE                       | SERIOUS                               | MODERATE                                             | SERIOUS                 |
| 8. Van de Vijver (2015)                              | CRITICAL                   | LOW                                                          | LOW                                              | SERIOUS                                                        | MODERATE                       | SERIOUS                               | MODERATE                                             | CRITICAL                |
| 9. Voos (2013)                                       | CRITICAL                   | LOW                                                          | LOW                                              | SERIOUS                                                        | NO INFO                        | SERIOUS                               | SERIOUS                                              | CRITICAL                |
| 10. Segre (2013)                                     | CRITICAL                   | NO INFO                                                      | LOW                                              | SERIOUS                                                        | SERIOUS                        | SERIOUS                               | MODERATE                                             | CRITICAL                |
| 11. Palma (2012)                                     | CRITICAL                   | NO INFO                                                      | LOW                                              | SERIOUS                                                        | SERIOUS                        | SERIOUS                               | CRITICAL                                             | CRITICAL                |
| 12. Stevens (2011)                                   | SERIOUS                    | LOW                                                          | LOW                                              | SERIOUS                                                        | SERIOUS                        | SERIOUS                               | MODERATE                                             | SERIOUS                 |
| 13. Voos (2011)                                      | SERIOUS                    | LOW                                                          | LOW                                              | SERIOUS                                                        | SERIOUS                        | SERIOUS                               | MODERATE                                             | SERIOUS                 |
| 14. Weiss (2010)                                     | SERIOUS                    | LOW                                                          | LOW                                              | SERIOUS                                                        | LOW                            | SERIOUS                               | MODERATE                                             | SERIOUS                 |
| 15. Foster (2008)                                    | SERIOUS                    | CRITICAL                                                     | LOW                                              | SERIOUS                                                        | SERIOUS                        | SERIOUS                               | MODERATE                                             | CRITICAL                |
| 16. Byers (2006)                                     | SERIOUS                    | LOW                                                          | LOW                                              | SERIOUS                                                        | SERIOUS                        | SERIOUS                               | MODERATE                                             | SERIOUS                 |
| 18. Wielenga (2006)                                  | SERIOUS                    | LOW                                                          | LOW                                              | SERIOUS                                                        | LOW                            | SERIOUS                               | MODERATE                                             | SERIOUS                 |
| 19. Penticuff (2005)                                 | SERIOUS                    | LOW                                                          | LOW                                              | SERIOUS                                                        | LOW                            | SERIOUS                               | MODERATE                                             | SERIOUS                 |
| 20. Byers (2003)                                     | SERIOUS                    | LOW                                                          | LOW                                              | SERIOUS                                                        | LOW                            | SERIOUS                               | SERIOUS                                              | SERIOUS                 |
| 21. Polizzi (2003)                                   | SERIOUS                    | MODERATE                                                     | LOW                                              | SERIOUS                                                        | SERIOUS                        | SERIOUS                               | MODERATE                                             | SERIOUS                 |
| 22. Legault (1995)                                   | SERIOUS                    | CRITICAL                                                     | LOW                                              | CRITICAL                                                       | LOW                            | SERIOUS                               | MODERATE                                             | CRITICAL                |

- 1
- 2
- 3
- 4 1. intervention\$.ti,ab.
- 5 2. tool\$.ti,ab.
- 6
- 7 3. way\$.ti,ab.
- 8
- 9 4. updat\$.ti,ab.
- 10 5. method\$.ti,ab.
- 11
- 12 6. information.ti,ab.
- 13
- 14 7. sms.ti,ab.
- 15 8. implement\$.ti,ab.
- 16
- 17 9. 1 or 2 or 3 or 4 or 5 or 6 or 7 or 8
- 18 10. bab\$3.mp.
- 19
- 20 11. preterm\$.ti,ab.
- 21 12. pre term.ti,ab.
- 22
- 23 13. premature.ti,ab.
- 24
- 25 14. postterm.ti,ab.
- 26 15. post term.ti,ab.
- 27
- 28 16. infant\$.ti,ab.
- 29
- 30 17. newborn\$.ti,ab.
- 31 18. exp Infant, Newborn/
- 32
- 33 19. 10 or 11 or 12 or 13 or 14 or 15 or 16 or 17 or 18
- 34
- 35 20. neonatal intensive care.ti,ab.
- 36 21. neonatal unit\$.ti,ab.
- 37
- 38 22. NICU.ti,ab.
- 39
- 40 23. SCBU.ti,ab.
- 41 24. neonatal itu.ti,ab.
- 42
- 43 25. special care baby unit\$.ti,ab.
- 44
- 45 26. neonat\$.ti,ab.
- 46 27. Intensive Care Units, Neonatal/
- 47 28. Intensive Care Units/
- 48
- 49 29. Critical Care/
- 50
- 51 30. Neonatal Nursing/
- 52 31. 20 or 21 or 22 or 23 or 24 or 25 or 26 or 27 or 28 or 29 or 30
- 53
- 54 32. parent\$.ti,ab.
- 55 33. mother\$.ti,ab.
- 56 34. father\$.ti,ab.
- 57
- 58 35. exp Parents/
- 59
- 60



1  
2  
3  
4  
5  
6  
7  
8  
9  
10  
11  
12  
13  
14  
15  
16  
17  
18  
19  
20  
21  
22  
23  
24  
25  
26  
27  
28  
29  
30  
31  
32  
33  
34  
35  
36  
37  
38  
39  
40  
41  
42  
43  
44  
45  
46  
47  
48  
49  
50  
51  
52  
53  
54  
55  
56  
57  
58  
59  
60

- 36. 32 or 33 or 34 or 35
- 37. satisfaction.ti,ab.
- 38. experience\$.ti,ab.
- 39. Patient Satisfaction/
- 40. personal satisfaction/
- 41. communicat\$.ti,ab.
- 42. exp Communication/
- 43. Health Communication/
- 44. Information Dissemination/
- 45. 37 or 38 or 39 or 40 or 41 or 42 or 43 or 44
- 46. 9 and 19 and 31 and 36 and 45

ential: For Review Only

## Randomised controlled trials (RCT) by publication year

| Author (Date), Country                  | Parent Gender/ sample size | Infants Gestation age (GA) in weeks /NICU level | Study design                           | Intervention                                                                                                                                                                                                                                                                                                                             | Outcome measures                                               | Timing of measurement                                                                                                                                                                            | Method of measurement                                                                                                                                                                                                                                                                                                                                                                                                                                                                                                          | Results                                                                                                                                                                                                                                                                                                                                                                                                                                                                                                                                                                                                               | Parent co-design? | Improved parent satisfaction? |
|-----------------------------------------|----------------------------|-------------------------------------------------|----------------------------------------|------------------------------------------------------------------------------------------------------------------------------------------------------------------------------------------------------------------------------------------------------------------------------------------------------------------------------------------|----------------------------------------------------------------|--------------------------------------------------------------------------------------------------------------------------------------------------------------------------------------------------|--------------------------------------------------------------------------------------------------------------------------------------------------------------------------------------------------------------------------------------------------------------------------------------------------------------------------------------------------------------------------------------------------------------------------------------------------------------------------------------------------------------------------------|-----------------------------------------------------------------------------------------------------------------------------------------------------------------------------------------------------------------------------------------------------------------------------------------------------------------------------------------------------------------------------------------------------------------------------------------------------------------------------------------------------------------------------------------------------------------------------------------------------------------------|-------------------|-------------------------------|
| 1. Northrup et al. (2016), USA          | Mothers and fathers /116   | <28 / level III                                 | Randomised controlled trial            | <p><b>Intervention: Free Parking (FP).</b></p> <p>Parents received 7 parking vouchers at a time (value: \$10/each) and continued to receive vouchers until infant discharge. Each voucher allowed free entry and exit for 24hr.</p> <p><b>Control:</b> Parents received the standard care and did not receive vouchers.</p>              | <b>Parent satisfaction with NICU care</b>                      | <p>After babies were discharged (once)</p> <p>- During the first high-risk-infant clinic visit after discharge</p> <p>No pre-intervention parent satisfaction data available for comparison.</p> | <p><i>Satisfaction questionnaire</i></p> <p><b>Validation:</b> No content validity or reliability testing reported.</p> <p>11 questions</p> <p>- Seven items were summed (score 7-35) to measure "Support" (e.g., information sharing).</p> <p>- Three items measured "Emotional Connection" to the infant (score 3-15)</p> <p>- One item assessed "family involvement in infant care" (responses: not enough-just right-too much).</p> <p>Greater scores indicated higher perceived support, connection and satisfaction.</p> | <p><b>The groups did not differ significantly with respect to satisfaction.</b></p> <p><b>Interv Control p-value</b></p> <p>NICU support<br/><b>Mean (SD)</b> 30(2.7) 28.7(3.7) 0.07</p> <p>Emotional connection<br/>12.3(1.7) 12.3(1.7) 0.96</p> <p>Family involvement "just right"<br/>81.4% 85% 0.07</p>                                                                                                                                                                                                                                                                                                           | No                | 2                             |
| 2. Abdel-Latif et al. (2015), Australia | Mothers and fathers /63    | 25-42 / level III                               | Cross-over Randomised Controlled Trial | <p><b>Intervention: Parental Presence at Clinical Bedside Rounds (PPCBR).</b></p> <p>Parents attended bedside clinical rounds. Parents had opportunity to ask questions about their baby's condition and management.</p> <p><b>Control:</b> Parents received the standard care with no parental presence at bedside clinical rounds.</p> | <b>Parent satisfaction assessed by questions of 3 domains:</b> | <p>During babies' admission (once)</p> <p>- At the end of each study arm, separated by a washout period</p> <p>- No pre-intervention parent satisfaction data available for comparison</p>       | <p><i>Satisfaction questionnaire</i></p> <p>The authors stated "the research team designed the questionnaire".</p> <p><b>Validation:</b> No content validity or reliability testing reported.</p> <p>Number and format of questions: not stated</p>                                                                                                                                                                                                                                                                            | <p><b>PPCBR had significantly higher adjusted mean (95% CI) scores for some questions from domains 1 and 2.</b></p> <p>Domain 3 was comparable between the two study groups.</p> <p><b>Interv Control p-value</b></p> <p>Domain 1 question:<br/>"I have received adequate information about my baby's condition and management"<br/><b>Mean</b> 4.321 3.947 0.03</p> <p>Domain 2 questions:<br/>"In the last week I have been able to communicate effectively with my baby's healthcare team"<br/><b>Mean</b> 4.407 4.250 0.05</p> <p>"In the last week I have collaborated with my baby's healthcare team in the</p> | No                | 1                             |

|                                      |                                  |                                                                                                   |                                                   |                                                                                                                                                                                                                                                                                                                                                                                                                                                                                                                                                                                                                                                                   |                                                                                                                                                                                                                             |                                                                                                                                                         |                                                                                                                                                                                                                                                                                                                                                                                                                                                                                           |                                                                                                                                                                                                                                                                                                                                                                                                                                                                                                                                                                                                       |                                                                                                                                                                                                                |          |
|--------------------------------------|----------------------------------|---------------------------------------------------------------------------------------------------|---------------------------------------------------|-------------------------------------------------------------------------------------------------------------------------------------------------------------------------------------------------------------------------------------------------------------------------------------------------------------------------------------------------------------------------------------------------------------------------------------------------------------------------------------------------------------------------------------------------------------------------------------------------------------------------------------------------------------------|-----------------------------------------------------------------------------------------------------------------------------------------------------------------------------------------------------------------------------|---------------------------------------------------------------------------------------------------------------------------------------------------------|-------------------------------------------------------------------------------------------------------------------------------------------------------------------------------------------------------------------------------------------------------------------------------------------------------------------------------------------------------------------------------------------------------------------------------------------------------------------------------------------|-------------------------------------------------------------------------------------------------------------------------------------------------------------------------------------------------------------------------------------------------------------------------------------------------------------------------------------------------------------------------------------------------------------------------------------------------------------------------------------------------------------------------------------------------------------------------------------------------------|----------------------------------------------------------------------------------------------------------------------------------------------------------------------------------------------------------------|----------|
|                                      |                                  |                                                                                                   |                                                   |                                                                                                                                                                                                                                                                                                                                                                                                                                                                                                                                                                                                                                                                   |                                                                                                                                                                                                                             |                                                                                                                                                         |                                                                                                                                                                                                                                                                                                                                                                                                                                                                                           | <p>planning of care for my baby”<br/> <b>Mean</b> 3.843 3.426 0.02</p> <p>“In the last week I have been able to ask the healthcare team questions about my baby’s care”<br/> <b>Mean</b> 4.642 4.259 0.004</p>                                                                                                                                                                                                                                                                                                                                                                                        |                                                                                                                                                                                                                |          |
| 3. Bastani et al, (2015), Iran       | Mothers /100                     | 30-37<br>Mean (SD)<br><br>Control: 33.90 (2.33)<br><br>Interv: 34 (1.9)<br><br>/ level not stated | Randomised Controlled Trial (block randomisation) | <p><b>Intervention: Family-centered Care (FCC).</b></p> <p>Mothers allowed access to their baby at any time, participated in the care process and were provided with information about neonatal care.</p> <p><b>Control:</b> Mothers received the standard care where they were only allowed to be present at the time of the infant’s entry to the neonatal care unit, and were only routinely informed.</p>                                                                                                                                                                                                                                                     | <p><b>Maternal satisfaction relating to three themes:</b></p> <ol style="list-style-type: none"> <li>1. Parental presence</li> <li>2. Participation in neonatal care</li> <li>3. Information about neonatal care</li> </ol> | <p>During babies’ admission (twice)</p> <p>- 24 hours after admission<br/> - At the time of discharge</p>                                               | <p><b>Satisfaction questionnaire (Validated)</b></p> <p>A modified satisfaction questionnaire was used, based on a parental satisfaction instrument developed for measuring satisfaction in Paediatric intensive care Units (PICU).</p> <p>18 questions</p> <p>Graded 0 (very dissatisfied) to 4 (very satisfied).</p> <p>The overall satisfaction rate was classified based on the mean scores (score&lt;50%, between 75-50% and &gt; 75%).</p>                                          | <p><b>In the FCC group, pre and post intervention difference in maternal satisfaction was statistically significant p&lt;0.001</b></p> <p><b>Interv Control p-value Mean (SD)</b></p> <p><b>At 24 hr</b><br/> 22.36(8.90) 22.06(9.77) 0.87</p> <p><b>At discharge</b><br/> 59.28(6.86) 30.18(14.09) &lt;0.01</p>                                                                                                                                                                                                                                                                                      | <p><b>Unclear</b></p> <p>Mothers determined the reliability of the satisfaction tool and approved the educational pamphlet. Authors did not report if mothers had direct input in the intervention design.</p> | <b>1</b> |
| 4. Clarke-Pounder et al. (2015), USA | Mothers and fathers /19 families | 23-39 / level III                                                                                 | Randomised Controlled Trial                       | <p><b>Intervention: Sharing information obtained from parent interviews with the primary NICU provider.</b></p> <p>Parents interviewed using the <i>NICU- adapted Decision Making Tool (N-DMT)</i>. Information obtained was placed in the electronic medical record (EMR) and shared with the primary neonatal provider via email. Daily rounds on all infants were audio-recorded for 3 days after enrollment to see if information from the N-DMT was incorporated into daily care planning.</p> <p><b>Control:</b> The content of a recent social work note was communicated with the primary provider via e-mail, creating an attentional control group.</p> | <p><b>Parent satisfaction with care</b></p>                                                                                                                                                                                 | <p>During babies’ admission (once)</p> <p>- 2 weeks after study entry</p> <p>No pre-intervention parent satisfaction data available for comparison.</p> | <p><b>Satisfaction questionnaire</b></p> <p>A <i>NICU- adapted Decision Making Tool (N-DMT)</i> – specific questionnaire was used.</p> <p><b>Validation:</b> Partially reported. Authors stated reliability testing took place; no information on content validity provided.</p> <p>8 questions: e.g. “My baby’s doctors considered my goals and hopes for my baby during decision-making”.</p> <p>Likert scale (1 strongly agree-4 strongly disagree). Total N-DMT score range 8-32.</p> | <p><b>There was no significant difference in satisfaction with care as measured by the N-DMT scale between the control group and intervention groups in a univariable model or multiple variable model controlling for gestational age.</b></p> <p><b>Interv Control Median (range)</b><br/> 26(15–28) 28.8(19–32)</p> <p><b>No p-value reported</b></p> <p>There was, however, a pattern of decreased satisfaction with care among the intervention group compared to the control group across the N-DMT-specific survey questions, although the differences were not statistically significant.</p> | <p><b>Yes</b></p> <p>Information obtained from parents using the N-DMT was placed in the electronic medical record (EMR) and shared with the primary NICU provider via email (forming the intervention)</p>    | <b>2</b> |
| 5. Holditch-Davis et al. (2013), USA | Mothers /208                     | Preterm infants                                                                                   | Randomised controlled trial                       | <p><b>Interventions: 1. Mothers were taught how to massage infants with auditory, tactile, visual,</b></p>                                                                                                                                                                                                                                                                                                                                                                                                                                                                                                                                                        | <p><b>1. Parent (mother) satisfaction with the</b></p>                                                                                                                                                                      | <p>During admission period and post discharge</p>                                                                                                       | <p><b>Satisfaction questionnaire</b></p> <p>The questionnaire was designed by the study team.</p>                                                                                                                                                                                                                                                                                                                                                                                         | <p><b>No significant differences occurred between the groups.</b></p>                                                                                                                                                                                                                                                                                                                                                                                                                                                                                                                                 | <p><b>No</b></p>                                                                                                                                                                                               | <b>2</b> |

| 1<br>2<br>3<br>4<br>5<br>6<br>7<br>8<br>9<br>10<br>11<br>12<br>13<br>14<br>15<br>16                                                          |                                  | Mean (SD)<br><br>Overall group 27.2 (3.0)<br><br>/ 4 centres, levels II-III | 3 groups (2 intervention and 1 control)<br><br>Post-intervention testing only.                  | <b>and vestibular stimulation (ATVV intervention)</b><br><b>2. Kangaroo care</b><br><br><u>Control:</u> Attention control group. Mothers spent a similar amount of time with the study nurse discussing the equipment needed for preterm infant care at home. Study nurses provided education and support for all three groups. Mothers were not prevented from engaging in interventions of the other groups but did not receive formal education from the study nurse on the other interventions.                                                                                                                                                                                                                                        | <b>intervention</b><br><br><b>2. Satisfaction with the helpfulness of the study nurse</b><br><br><b>3. Whether the mother would recommend the study to others and the degree of change in the mother as a person and as a mother as a result of being in the study.</b>                    | - At the time of discharge<br><br>- At 2 months corrected age<br><br>No pre-intervention parent satisfaction data available for comparison. | <u>Validation:</u> Partially reported. Authors stated reliability testing took place; no information on content validity provided.<br><br><u>26 questions:</u> relating to three dimensions of satisfaction: efficacy, caring, and technical quality.<br><br>Likert (1 least satisfied-5, 5 most satisfied)                                                                                                                                                                                                                                                                | Mothers in all three groups were satisfied with the intervention (mean scores of 3.3 or higher on a 5-point scale) and the helpfulness of the nurse (mean scores of 4.6 or higher on a 5-point scale).                                                                                                                                                                                                                                                                                                                                                                                                                                                                                                                     |           |          |         |           |            |            |  |        |         |           |            |            |                                                                                                                            |          |
|----------------------------------------------------------------------------------------------------------------------------------------------|----------------------------------|-----------------------------------------------------------------------------|-------------------------------------------------------------------------------------------------|--------------------------------------------------------------------------------------------------------------------------------------------------------------------------------------------------------------------------------------------------------------------------------------------------------------------------------------------------------------------------------------------------------------------------------------------------------------------------------------------------------------------------------------------------------------------------------------------------------------------------------------------------------------------------------------------------------------------------------------------|--------------------------------------------------------------------------------------------------------------------------------------------------------------------------------------------------------------------------------------------------------------------------------------------|---------------------------------------------------------------------------------------------------------------------------------------------|----------------------------------------------------------------------------------------------------------------------------------------------------------------------------------------------------------------------------------------------------------------------------------------------------------------------------------------------------------------------------------------------------------------------------------------------------------------------------------------------------------------------------------------------------------------------------|----------------------------------------------------------------------------------------------------------------------------------------------------------------------------------------------------------------------------------------------------------------------------------------------------------------------------------------------------------------------------------------------------------------------------------------------------------------------------------------------------------------------------------------------------------------------------------------------------------------------------------------------------------------------------------------------------------------------------|-----------|----------|---------|-----------|------------|------------|--|--------|---------|-----------|------------|------------|----------------------------------------------------------------------------------------------------------------------------|----------|
| 17<br>18<br>19<br>20<br>21<br>22<br>23<br>24<br>25<br>26<br>27<br>28<br>29<br>30<br>31<br>32<br>33<br>34<br>35<br>36<br>37<br>38<br>39<br>40 | 6. Franck et al. (2011), UK      | Mothers and fathers /169                                                    | Mean (SD)<br><br>Control: 31.94 (5.17)<br><br>Interv: 29.40 (3.17)<br><br>/4 centres, level III | Cluster Randomised Controlled Trial<br><br><u>Intervention: Increasing parental involvement in infant pain management in the NICU.</u><br><br>Parents received a booklet providing evidence-based information about pain and comforting infants in the NICU setting. Parents received 2 visits from a research nurse showing them how to apply the comforting techniques described in the booklet.<br><br><u>Control:</u> As part of usual care, parents in both the intervention and control groups received a detailed booklet with generic information about NICU care. Parents in the control group also received 2 visits from a research nurse listening to what parents had to say about their NICU experience (attention placebo). | At baseline:<br><br><b>1. Parent satisfaction with NICU care</b><br><br>One week after the intervention:<br><br><b>1. Satisfaction with information about pain control</b><br><br><b>2. Satisfied nurses make infant comfortable</b><br><br><b>3. Satisfied pain medicines help infant</b> | During babies' admission (twice)<br><br>-At baseline (within 3 to 7 days of admission)<br><br>- 1 week after the intervention               | <u>Individual questions</u><br><br><u>Validation:</u> No content validity or reliability testing reported.<br><br>1. At baseline:<br><br>Parent satisfaction was measured by 1 question: "Satisfaction with NICU care" (1 very satisfied-6 very unsatisfied) as part of the baseline parent characteristics questionnaire.<br><br>2. One week after the intervention:<br><br>Three questions using the word "satisfied" were selected from the validated <i>Parent Attitudes About Infant Nociception (PAIN)</i> survey (Likert scale 1 very satisfied-6 very unsatisfied) | <b>At baseline: there was no significant difference in satisfaction between intervention and control group</b><br><br><table border="1"> <thead> <tr> <th></th> <th>Interv</th> <th>Control</th> </tr> </thead> <tbody> <tr> <td>Mean (SD)</td> <td>1.45(0.71)</td> <td>1.51(0.76)</td> </tr> </tbody> </table> <p>p-value missing</p><br><b>1 week after the intervention: Intervention parents were more satisfied with the information about pain control received than control parents.</b><br><br><table border="1"> <thead> <tr> <th></th> <th>Interv</th> <th>Control</th> </tr> </thead> <tbody> <tr> <td>Mean (SD)</td> <td>2.10(0.97)</td> <td>3.28(1.27)</td> </tr> </tbody> </table> <p>p-value &lt; 0.001</p> |           | Interv   | Control | Mean (SD) | 1.45(0.71) | 1.51(0.76) |  | Interv | Control | Mean (SD) | 2.10(0.97) | 3.28(1.27) | <b>Yes</b><br><br>The booklet was reviewed by 12 parents of infants who had been cared for in NICUs in the United Kingdom. | <b>1</b> |
|                                                                                                                                              | Interv                           | Control                                                                     |                                                                                                 |                                                                                                                                                                                                                                                                                                                                                                                                                                                                                                                                                                                                                                                                                                                                            |                                                                                                                                                                                                                                                                                            |                                                                                                                                             |                                                                                                                                                                                                                                                                                                                                                                                                                                                                                                                                                                            |                                                                                                                                                                                                                                                                                                                                                                                                                                                                                                                                                                                                                                                                                                                            |           |          |         |           |            |            |  |        |         |           |            |            |                                                                                                                            |          |
| Mean (SD)                                                                                                                                    | 1.45(0.71)                       | 1.51(0.76)                                                                  |                                                                                                 |                                                                                                                                                                                                                                                                                                                                                                                                                                                                                                                                                                                                                                                                                                                                            |                                                                                                                                                                                                                                                                                            |                                                                                                                                             |                                                                                                                                                                                                                                                                                                                                                                                                                                                                                                                                                                            |                                                                                                                                                                                                                                                                                                                                                                                                                                                                                                                                                                                                                                                                                                                            |           |          |         |           |            |            |  |        |         |           |            |            |                                                                                                                            |          |
|                                                                                                                                              | Interv                           | Control                                                                     |                                                                                                 |                                                                                                                                                                                                                                                                                                                                                                                                                                                                                                                                                                                                                                                                                                                                            |                                                                                                                                                                                                                                                                                            |                                                                                                                                             |                                                                                                                                                                                                                                                                                                                                                                                                                                                                                                                                                                            |                                                                                                                                                                                                                                                                                                                                                                                                                                                                                                                                                                                                                                                                                                                            |           |          |         |           |            |            |  |        |         |           |            |            |                                                                                                                            |          |
| Mean (SD)                                                                                                                                    | 2.10(0.97)                       | 3.28(1.27)                                                                  |                                                                                                 |                                                                                                                                                                                                                                                                                                                                                                                                                                                                                                                                                                                                                                                                                                                                            |                                                                                                                                                                                                                                                                                            |                                                                                                                                             |                                                                                                                                                                                                                                                                                                                                                                                                                                                                                                                                                                            |                                                                                                                                                                                                                                                                                                                                                                                                                                                                                                                                                                                                                                                                                                                            |           |          |         |           |            |            |  |        |         |           |            |            |                                                                                                                            |          |
| 41<br>42<br>43<br>44<br>45<br>46                                                                                                             | 7. Livingston et al. (2009), USA | Mothers /12                                                                 | Mean (SD)<br><br>Control:                                                                       | Randomised Controlled Trial<br><br><u>Intervention: Touch and massage.</u><br><br>Mothers attended a 1hr massage class taught by a                                                                                                                                                                                                                                                                                                                                                                                                                                                                                                                                                                                                         | <b>1. Caregiver (mother) satisfaction with their infant's care</b>                                                                                                                                                                                                                         | During babies' admission (three times)<br><br>- At baseline                                                                                 | <u>Satisfaction questionnaire</u><br><br>Two questionnaires were developed by the research team.                                                                                                                                                                                                                                                                                                                                                                                                                                                                           | <b>It is unclear in the report if specific between-group comparisons and statistical analysis were conducted.</b>                                                                                                                                                                                                                                                                                                                                                                                                                                                                                                                                                                                                          | <b>No</b> | <b>3</b> |         |           |            |            |  |        |         |           |            |            |                                                                                                                            |          |

| 1                   |                                 | 33.4 (6.4)            |                         | nurse CIMI (certified infant massage instructor) and were asked to participate in at least 3 bedside massage instruction sessions taught within the next week. Infants received massage for 7 consecutive days, from the mother or a CIMI. The touch procedure lasted 20 minutes. | <b>2. Caregiver satisfaction with the neonatal unit and the massage therapist</b>                                                                                                                                                                                                                                                                                                    | - Upon completing the 7-day massage program<br><br>- 1 month following intervention                         | <b>Validation:</b> No content validity or reliability testing reported.<br><br>-1 <sup>st</sup> questionnaire (at baseline): a brief self-report questionnaire about caregiver satisfaction with their infant's care until that moment. No further details reported.<br><br>-2 <sup>nd</sup> questionnaire (upon completing the 7-day massage program and 1 month following intervention): a 10-minute satisfaction questionnaire relating to infant's response and caregiver satisfaction with the neonatal unit and the massage therapist.<br><br><b>Number of questions:</b> not stated.<br><br>Likert scale (1 very dissatisfied-4 very satisfied).<br><br>Sample statements:<br>'How satisfied do you feel giving massage to your infant?'; 'I feel that massage improved my infant's hospital stay.' | <b>At baseline and day 7:</b> All caregivers were highly satisfied with the medical treatment their infant received.<br><br><b>At day 7 and 1 month follow-up:</b> All caregivers participating in the massage group reported high levels of satisfaction regarding their relationship with their infant and the massage program's impact on that relationship.<br><br>Slight improvements in satisfaction regarding time the caregiver spent with the infant and involvement in the infant's care were observed between day 7 and the 1-month follow-up (no further information reported). |                                                                                                                                                                                                                                                                                                                                                                                                                                                                                                                                                                                                                                                                                       |  |        |         |                     |                |                   |           |          |
|---------------------|---------------------------------|-----------------------|-------------------------|-----------------------------------------------------------------------------------------------------------------------------------------------------------------------------------------------------------------------------------------------------------------------------------|--------------------------------------------------------------------------------------------------------------------------------------------------------------------------------------------------------------------------------------------------------------------------------------------------------------------------------------------------------------------------------------|-------------------------------------------------------------------------------------------------------------|------------------------------------------------------------------------------------------------------------------------------------------------------------------------------------------------------------------------------------------------------------------------------------------------------------------------------------------------------------------------------------------------------------------------------------------------------------------------------------------------------------------------------------------------------------------------------------------------------------------------------------------------------------------------------------------------------------------------------------------------------------------------------------------------------------|---------------------------------------------------------------------------------------------------------------------------------------------------------------------------------------------------------------------------------------------------------------------------------------------------------------------------------------------------------------------------------------------------------------------------------------------------------------------------------------------------------------------------------------------------------------------------------------------|---------------------------------------------------------------------------------------------------------------------------------------------------------------------------------------------------------------------------------------------------------------------------------------------------------------------------------------------------------------------------------------------------------------------------------------------------------------------------------------------------------------------------------------------------------------------------------------------------------------------------------------------------------------------------------------|--|--------|---------|---------------------|----------------|-------------------|-----------|----------|
| 2                   |                                 | Interv:<br>38.5 (3.1) |                         | <b>Control:</b> Infants received all usual hospital services including medical care, physical and occupational therapy services and developmentally supportive nursing care.                                                                                                      |                                                                                                                                                                                                                                                                                                                                                                                      |                                                                                                             |                                                                                                                                                                                                                                                                                                                                                                                                                                                                                                                                                                                                                                                                                                                                                                                                            |                                                                                                                                                                                                                                                                                                                                                                                                                                                                                                                                                                                             |                                                                                                                                                                                                                                                                                                                                                                                                                                                                                                                                                                                                                                                                                       |  |        |         |                     |                |                   |           |          |
| 3                   |                                 | / level III           |                         |                                                                                                                                                                                                                                                                                   |                                                                                                                                                                                                                                                                                                                                                                                      |                                                                                                             |                                                                                                                                                                                                                                                                                                                                                                                                                                                                                                                                                                                                                                                                                                                                                                                                            |                                                                                                                                                                                                                                                                                                                                                                                                                                                                                                                                                                                             |                                                                                                                                                                                                                                                                                                                                                                                                                                                                                                                                                                                                                                                                                       |  |        |         |                     |                |                   |           |          |
| 4                   |                                 |                       |                         |                                                                                                                                                                                                                                                                                   |                                                                                                                                                                                                                                                                                                                                                                                      |                                                                                                             |                                                                                                                                                                                                                                                                                                                                                                                                                                                                                                                                                                                                                                                                                                                                                                                                            |                                                                                                                                                                                                                                                                                                                                                                                                                                                                                                                                                                                             |                                                                                                                                                                                                                                                                                                                                                                                                                                                                                                                                                                                                                                                                                       |  |        |         |                     |                |                   |           |          |
| 5                   |                                 |                       |                         |                                                                                                                                                                                                                                                                                   |                                                                                                                                                                                                                                                                                                                                                                                      |                                                                                                             |                                                                                                                                                                                                                                                                                                                                                                                                                                                                                                                                                                                                                                                                                                                                                                                                            |                                                                                                                                                                                                                                                                                                                                                                                                                                                                                                                                                                                             |                                                                                                                                                                                                                                                                                                                                                                                                                                                                                                                                                                                                                                                                                       |  |        |         |                     |                |                   |           |          |
| 6                   |                                 |                       |                         |                                                                                                                                                                                                                                                                                   |                                                                                                                                                                                                                                                                                                                                                                                      |                                                                                                             |                                                                                                                                                                                                                                                                                                                                                                                                                                                                                                                                                                                                                                                                                                                                                                                                            |                                                                                                                                                                                                                                                                                                                                                                                                                                                                                                                                                                                             |                                                                                                                                                                                                                                                                                                                                                                                                                                                                                                                                                                                                                                                                                       |  |        |         |                     |                |                   |           |          |
| 7                   |                                 |                       |                         |                                                                                                                                                                                                                                                                                   |                                                                                                                                                                                                                                                                                                                                                                                      |                                                                                                             |                                                                                                                                                                                                                                                                                                                                                                                                                                                                                                                                                                                                                                                                                                                                                                                                            |                                                                                                                                                                                                                                                                                                                                                                                                                                                                                                                                                                                             |                                                                                                                                                                                                                                                                                                                                                                                                                                                                                                                                                                                                                                                                                       |  |        |         |                     |                |                   |           |          |
| 8                   |                                 |                       |                         |                                                                                                                                                                                                                                                                                   |                                                                                                                                                                                                                                                                                                                                                                                      |                                                                                                             |                                                                                                                                                                                                                                                                                                                                                                                                                                                                                                                                                                                                                                                                                                                                                                                                            |                                                                                                                                                                                                                                                                                                                                                                                                                                                                                                                                                                                             |                                                                                                                                                                                                                                                                                                                                                                                                                                                                                                                                                                                                                                                                                       |  |        |         |                     |                |                   |           |          |
| 9                   |                                 |                       |                         |                                                                                                                                                                                                                                                                                   |                                                                                                                                                                                                                                                                                                                                                                                      |                                                                                                             |                                                                                                                                                                                                                                                                                                                                                                                                                                                                                                                                                                                                                                                                                                                                                                                                            |                                                                                                                                                                                                                                                                                                                                                                                                                                                                                                                                                                                             |                                                                                                                                                                                                                                                                                                                                                                                                                                                                                                                                                                                                                                                                                       |  |        |         |                     |                |                   |           |          |
| 10                  |                                 |                       |                         |                                                                                                                                                                                                                                                                                   |                                                                                                                                                                                                                                                                                                                                                                                      |                                                                                                             |                                                                                                                                                                                                                                                                                                                                                                                                                                                                                                                                                                                                                                                                                                                                                                                                            |                                                                                                                                                                                                                                                                                                                                                                                                                                                                                                                                                                                             |                                                                                                                                                                                                                                                                                                                                                                                                                                                                                                                                                                                                                                                                                       |  |        |         |                     |                |                   |           |          |
| 11                  |                                 |                       |                         |                                                                                                                                                                                                                                                                                   |                                                                                                                                                                                                                                                                                                                                                                                      |                                                                                                             |                                                                                                                                                                                                                                                                                                                                                                                                                                                                                                                                                                                                                                                                                                                                                                                                            |                                                                                                                                                                                                                                                                                                                                                                                                                                                                                                                                                                                             |                                                                                                                                                                                                                                                                                                                                                                                                                                                                                                                                                                                                                                                                                       |  |        |         |                     |                |                   |           |          |
| 12                  |                                 |                       |                         |                                                                                                                                                                                                                                                                                   |                                                                                                                                                                                                                                                                                                                                                                                      |                                                                                                             |                                                                                                                                                                                                                                                                                                                                                                                                                                                                                                                                                                                                                                                                                                                                                                                                            |                                                                                                                                                                                                                                                                                                                                                                                                                                                                                                                                                                                             |                                                                                                                                                                                                                                                                                                                                                                                                                                                                                                                                                                                                                                                                                       |  |        |         |                     |                |                   |           |          |
| 13                  |                                 |                       |                         |                                                                                                                                                                                                                                                                                   |                                                                                                                                                                                                                                                                                                                                                                                      |                                                                                                             |                                                                                                                                                                                                                                                                                                                                                                                                                                                                                                                                                                                                                                                                                                                                                                                                            |                                                                                                                                                                                                                                                                                                                                                                                                                                                                                                                                                                                             |                                                                                                                                                                                                                                                                                                                                                                                                                                                                                                                                                                                                                                                                                       |  |        |         |                     |                |                   |           |          |
| 14                  |                                 |                       |                         |                                                                                                                                                                                                                                                                                   |                                                                                                                                                                                                                                                                                                                                                                                      |                                                                                                             |                                                                                                                                                                                                                                                                                                                                                                                                                                                                                                                                                                                                                                                                                                                                                                                                            |                                                                                                                                                                                                                                                                                                                                                                                                                                                                                                                                                                                             |                                                                                                                                                                                                                                                                                                                                                                                                                                                                                                                                                                                                                                                                                       |  |        |         |                     |                |                   |           |          |
| 15                  |                                 |                       |                         |                                                                                                                                                                                                                                                                                   |                                                                                                                                                                                                                                                                                                                                                                                      |                                                                                                             |                                                                                                                                                                                                                                                                                                                                                                                                                                                                                                                                                                                                                                                                                                                                                                                                            |                                                                                                                                                                                                                                                                                                                                                                                                                                                                                                                                                                                             |                                                                                                                                                                                                                                                                                                                                                                                                                                                                                                                                                                                                                                                                                       |  |        |         |                     |                |                   |           |          |
| 16                  |                                 |                       |                         |                                                                                                                                                                                                                                                                                   |                                                                                                                                                                                                                                                                                                                                                                                      |                                                                                                             |                                                                                                                                                                                                                                                                                                                                                                                                                                                                                                                                                                                                                                                                                                                                                                                                            |                                                                                                                                                                                                                                                                                                                                                                                                                                                                                                                                                                                             |                                                                                                                                                                                                                                                                                                                                                                                                                                                                                                                                                                                                                                                                                       |  |        |         |                     |                |                   |           |          |
| 17                  |                                 |                       |                         |                                                                                                                                                                                                                                                                                   |                                                                                                                                                                                                                                                                                                                                                                                      |                                                                                                             |                                                                                                                                                                                                                                                                                                                                                                                                                                                                                                                                                                                                                                                                                                                                                                                                            |                                                                                                                                                                                                                                                                                                                                                                                                                                                                                                                                                                                             |                                                                                                                                                                                                                                                                                                                                                                                                                                                                                                                                                                                                                                                                                       |  |        |         |                     |                |                   |           |          |
| 18                  |                                 |                       |                         |                                                                                                                                                                                                                                                                                   |                                                                                                                                                                                                                                                                                                                                                                                      |                                                                                                             |                                                                                                                                                                                                                                                                                                                                                                                                                                                                                                                                                                                                                                                                                                                                                                                                            |                                                                                                                                                                                                                                                                                                                                                                                                                                                                                                                                                                                             |                                                                                                                                                                                                                                                                                                                                                                                                                                                                                                                                                                                                                                                                                       |  |        |         |                     |                |                   |           |          |
| 19                  |                                 |                       |                         |                                                                                                                                                                                                                                                                                   |                                                                                                                                                                                                                                                                                                                                                                                      |                                                                                                             |                                                                                                                                                                                                                                                                                                                                                                                                                                                                                                                                                                                                                                                                                                                                                                                                            |                                                                                                                                                                                                                                                                                                                                                                                                                                                                                                                                                                                             |                                                                                                                                                                                                                                                                                                                                                                                                                                                                                                                                                                                                                                                                                       |  |        |         |                     |                |                   |           |          |
| 20                  |                                 |                       |                         |                                                                                                                                                                                                                                                                                   |                                                                                                                                                                                                                                                                                                                                                                                      |                                                                                                             |                                                                                                                                                                                                                                                                                                                                                                                                                                                                                                                                                                                                                                                                                                                                                                                                            |                                                                                                                                                                                                                                                                                                                                                                                                                                                                                                                                                                                             |                                                                                                                                                                                                                                                                                                                                                                                                                                                                                                                                                                                                                                                                                       |  |        |         |                     |                |                   |           |          |
| 21                  |                                 |                       |                         |                                                                                                                                                                                                                                                                                   |                                                                                                                                                                                                                                                                                                                                                                                      |                                                                                                             |                                                                                                                                                                                                                                                                                                                                                                                                                                                                                                                                                                                                                                                                                                                                                                                                            |                                                                                                                                                                                                                                                                                                                                                                                                                                                                                                                                                                                             |                                                                                                                                                                                                                                                                                                                                                                                                                                                                                                                                                                                                                                                                                       |  |        |         |                     |                |                   |           |          |
| 22                  |                                 |                       |                         |                                                                                                                                                                                                                                                                                   |                                                                                                                                                                                                                                                                                                                                                                                      |                                                                                                             |                                                                                                                                                                                                                                                                                                                                                                                                                                                                                                                                                                                                                                                                                                                                                                                                            |                                                                                                                                                                                                                                                                                                                                                                                                                                                                                                                                                                                             |                                                                                                                                                                                                                                                                                                                                                                                                                                                                                                                                                                                                                                                                                       |  |        |         |                     |                |                   |           |          |
| 23                  |                                 |                       |                         |                                                                                                                                                                                                                                                                                   |                                                                                                                                                                                                                                                                                                                                                                                      |                                                                                                             |                                                                                                                                                                                                                                                                                                                                                                                                                                                                                                                                                                                                                                                                                                                                                                                                            |                                                                                                                                                                                                                                                                                                                                                                                                                                                                                                                                                                                             |                                                                                                                                                                                                                                                                                                                                                                                                                                                                                                                                                                                                                                                                                       |  |        |         |                     |                |                   |           |          |
| 24                  | 8. Koh et al. (2007), Australia | Mothers /200          | Not stated / not stated | Randomised, Controlled Trial                                                                                                                                                                                                                                                      | <b>Intervention: Provision of taped conversations with neonatologists to mothers.</b><br><br>The initial conversation and subsequent conversations of significance with a neonatologist were taped and analysed (for both groups). Mothers received a tape of each conversation and a tape recorder.<br><br><b>Control:</b> Usual care. Mothers were not given the tape or recorder. | <b>Satisfaction with conversations held with the neonatologist</b><br><br><b>Satisfaction with the tape</b> | During admission period and post discharge<br><br>- At 10 days<br><br>- At 4 months<br><br>- At 12 months<br><br>No pre-intervention parent satisfaction data available for comparison.                                                                                                                                                                                                                                                                                                                                                                                                                                                                                                                                                                                                                    | <b>Individual questions and a satisfaction scale</b><br><b>Validation:</b> No content validity or reliability testing reported.<br><br><b>Number of questions:</b> not stated.<br><br>Likert scale (1-5 most satisfied)<br><br>Questions related to: Satisfaction with amount and quality of information presented, doctors' communication skills, patient's participation in the conversation.<br><br>A satisfaction scale was used to assess: Satisfaction with the tape                                                                                                                  | No differences were found between the two groups in satisfaction with conversations.<br><br><b>Mothers of babies with a poor outcome in the tape group were, however, significantly more satisfied with the conversations:</b><br><br><table border="1"> <thead> <tr> <th></th> <th>Interv</th> <th>Control</th> </tr> </thead> <tbody> <tr> <td><b>Mean (95%CI)</b></td> <td>115(104-123.2)</td> <td>100.5(94.1-109.4)</td> </tr> </tbody> </table> <p><b>p-value 0.0051</b></p> <p>Most (71-92%) of the mothers given the tapes stated that they helped their understanding, reminded them of what had been said, and helped their family to understand and recall information.</p> |  | Interv | Control | <b>Mean (95%CI)</b> | 115(104-123.2) | 100.5(94.1-109.4) | <b>No</b> | <b>1</b> |
|                     | Interv                          | Control               |                         |                                                                                                                                                                                                                                                                                   |                                                                                                                                                                                                                                                                                                                                                                                      |                                                                                                             |                                                                                                                                                                                                                                                                                                                                                                                                                                                                                                                                                                                                                                                                                                                                                                                                            |                                                                                                                                                                                                                                                                                                                                                                                                                                                                                                                                                                                             |                                                                                                                                                                                                                                                                                                                                                                                                                                                                                                                                                                                                                                                                                       |  |        |         |                     |                |                   |           |          |
| <b>Mean (95%CI)</b> | 115(104-123.2)                  | 100.5(94.1-109.4)     |                         |                                                                                                                                                                                                                                                                                   |                                                                                                                                                                                                                                                                                                                                                                                      |                                                                                                             |                                                                                                                                                                                                                                                                                                                                                                                                                                                                                                                                                                                                                                                                                                                                                                                                            |                                                                                                                                                                                                                                                                                                                                                                                                                                                                                                                                                                                             |                                                                                                                                                                                                                                                                                                                                                                                                                                                                                                                                                                                                                                                                                       |  |        |         |                     |                |                   |           |          |
| 25                  |                                 |                       |                         |                                                                                                                                                                                                                                                                                   |                                                                                                                                                                                                                                                                                                                                                                                      |                                                                                                             |                                                                                                                                                                                                                                                                                                                                                                                                                                                                                                                                                                                                                                                                                                                                                                                                            |                                                                                                                                                                                                                                                                                                                                                                                                                                                                                                                                                                                             |                                                                                                                                                                                                                                                                                                                                                                                                                                                                                                                                                                                                                                                                                       |  |        |         |                     |                |                   |           |          |
| 26                  |                                 |                       |                         |                                                                                                                                                                                                                                                                                   |                                                                                                                                                                                                                                                                                                                                                                                      |                                                                                                             |                                                                                                                                                                                                                                                                                                                                                                                                                                                                                                                                                                                                                                                                                                                                                                                                            |                                                                                                                                                                                                                                                                                                                                                                                                                                                                                                                                                                                             |                                                                                                                                                                                                                                                                                                                                                                                                                                                                                                                                                                                                                                                                                       |  |        |         |                     |                |                   |           |          |
| 27                  |                                 |                       |                         |                                                                                                                                                                                                                                                                                   |                                                                                                                                                                                                                                                                                                                                                                                      |                                                                                                             |                                                                                                                                                                                                                                                                                                                                                                                                                                                                                                                                                                                                                                                                                                                                                                                                            |                                                                                                                                                                                                                                                                                                                                                                                                                                                                                                                                                                                             |                                                                                                                                                                                                                                                                                                                                                                                                                                                                                                                                                                                                                                                                                       |  |        |         |                     |                |                   |           |          |
| 28                  |                                 |                       |                         |                                                                                                                                                                                                                                                                                   |                                                                                                                                                                                                                                                                                                                                                                                      |                                                                                                             |                                                                                                                                                                                                                                                                                                                                                                                                                                                                                                                                                                                                                                                                                                                                                                                                            |                                                                                                                                                                                                                                                                                                                                                                                                                                                                                                                                                                                             |                                                                                                                                                                                                                                                                                                                                                                                                                                                                                                                                                                                                                                                                                       |  |        |         |                     |                |                   |           |          |
| 29                  |                                 |                       |                         |                                                                                                                                                                                                                                                                                   |                                                                                                                                                                                                                                                                                                                                                                                      |                                                                                                             |                                                                                                                                                                                                                                                                                                                                                                                                                                                                                                                                                                                                                                                                                                                                                                                                            |                                                                                                                                                                                                                                                                                                                                                                                                                                                                                                                                                                                             |                                                                                                                                                                                                                                                                                                                                                                                                                                                                                                                                                                                                                                                                                       |  |        |         |                     |                |                   |           |          |
| 30                  |                                 |                       |                         |                                                                                                                                                                                                                                                                                   |                                                                                                                                                                                                                                                                                                                                                                                      |                                                                                                             |                                                                                                                                                                                                                                                                                                                                                                                                                                                                                                                                                                                                                                                                                                                                                                                                            |                                                                                                                                                                                                                                                                                                                                                                                                                                                                                                                                                                                             |                                                                                                                                                                                                                                                                                                                                                                                                                                                                                                                                                                                                                                                                                       |  |        |         |                     |                |                   |           |          |
| 31                  |                                 |                       |                         |                                                                                                                                                                                                                                                                                   |                                                                                                                                                                                                                                                                                                                                                                                      |                                                                                                             |                                                                                                                                                                                                                                                                                                                                                                                                                                                                                                                                                                                                                                                                                                                                                                                                            |                                                                                                                                                                                                                                                                                                                                                                                                                                                                                                                                                                                             |                                                                                                                                                                                                                                                                                                                                                                                                                                                                                                                                                                                                                                                                                       |  |        |         |                     |                |                   |           |          |
| 32                  |                                 |                       |                         |                                                                                                                                                                                                                                                                                   |                                                                                                                                                                                                                                                                                                                                                                                      |                                                                                                             |                                                                                                                                                                                                                                                                                                                                                                                                                                                                                                                                                                                                                                                                                                                                                                                                            |                                                                                                                                                                                                                                                                                                                                                                                                                                                                                                                                                                                             |                                                                                                                                                                                                                                                                                                                                                                                                                                                                                                                                                                                                                                                                                       |  |        |         |                     |                |                   |           |          |
| 33                  |                                 |                       |                         |                                                                                                                                                                                                                                                                                   |                                                                                                                                                                                                                                                                                                                                                                                      |                                                                                                             |                                                                                                                                                                                                                                                                                                                                                                                                                                                                                                                                                                                                                                                                                                                                                                                                            |                                                                                                                                                                                                                                                                                                                                                                                                                                                                                                                                                                                             |                                                                                                                                                                                                                                                                                                                                                                                                                                                                                                                                                                                                                                                                                       |  |        |         |                     |                |                   |           |          |
| 34                  |                                 |                       |                         |                                                                                                                                                                                                                                                                                   |                                                                                                                                                                                                                                                                                                                                                                                      |                                                                                                             |                                                                                                                                                                                                                                                                                                                                                                                                                                                                                                                                                                                                                                                                                                                                                                                                            |                                                                                                                                                                                                                                                                                                                                                                                                                                                                                                                                                                                             |                                                                                                                                                                                                                                                                                                                                                                                                                                                                                                                                                                                                                                                                                       |  |        |         |                     |                |                   |           |          |
| 35                  |                                 |                       |                         |                                                                                                                                                                                                                                                                                   |                                                                                                                                                                                                                                                                                                                                                                                      |                                                                                                             |                                                                                                                                                                                                                                                                                                                                                                                                                                                                                                                                                                                                                                                                                                                                                                                                            |                                                                                                                                                                                                                                                                                                                                                                                                                                                                                                                                                                                             |                                                                                                                                                                                                                                                                                                                                                                                                                                                                                                                                                                                                                                                                                       |  |        |         |                     |                |                   |           |          |
| 36                  |                                 |                       |                         |                                                                                                                                                                                                                                                                                   |                                                                                                                                                                                                                                                                                                                                                                                      |                                                                                                             |                                                                                                                                                                                                                                                                                                                                                                                                                                                                                                                                                                                                                                                                                                                                                                                                            |                                                                                                                                                                                                                                                                                                                                                                                                                                                                                                                                                                                             |                                                                                                                                                                                                                                                                                                                                                                                                                                                                                                                                                                                                                                                                                       |  |        |         |                     |                |                   |           |          |
| 37                  |                                 |                       |                         |                                                                                                                                                                                                                                                                                   |                                                                                                                                                                                                                                                                                                                                                                                      |                                                                                                             |                                                                                                                                                                                                                                                                                                                                                                                                                                                                                                                                                                                                                                                                                                                                                                                                            |                                                                                                                                                                                                                                                                                                                                                                                                                                                                                                                                                                                             |                                                                                                                                                                                                                                                                                                                                                                                                                                                                                                                                                                                                                                                                                       |  |        |         |                     |                |                   |           |          |
| 38                  |                                 |                       |                         |                                                                                                                                                                                                                                                                                   |                                                                                                                                                                                                                                                                                                                                                                                      |                                                                                                             |                                                                                                                                                                                                                                                                                                                                                                                                                                                                                                                                                                                                                                                                                                                                                                                                            |                                                                                                                                                                                                                                                                                                                                                                                                                                                                                                                                                                                             |                                                                                                                                                                                                                                                                                                                                                                                                                                                                                                                                                                                                                                                                                       |  |        |         |                     |                |                   |           |          |
| 39                  |                                 |                       |                         |                                                                                                                                                                                                                                                                                   |                                                                                                                                                                                                                                                                                                                                                                                      |                                                                                                             |                                                                                                                                                                                                                                                                                                                                                                                                                                                                                                                                                                                                                                                                                                                                                                                                            |                                                                                                                                                                                                                                                                                                                                                                                                                                                                                                                                                                                             |                                                                                                                                                                                                                                                                                                                                                                                                                                                                                                                                                                                                                                                                                       |  |        |         |                     |                |                   |           |          |
| 40                  |                                 |                       |                         |                                                                                                                                                                                                                                                                                   |                                                                                                                                                                                                                                                                                                                                                                                      |                                                                                                             |                                                                                                                                                                                                                                                                                                                                                                                                                                                                                                                                                                                                                                                                                                                                                                                                            |                                                                                                                                                                                                                                                                                                                                                                                                                                                                                                                                                                                             |                                                                                                                                                                                                                                                                                                                                                                                                                                                                                                                                                                                                                                                                                       |  |        |         |                     |                |                   |           |          |
| 41                  |                                 |                       |                         |                                                                                                                                                                                                                                                                                   |                                                                                                                                                                                                                                                                                                                                                                                      |                                                                                                             |                                                                                                                                                                                                                                                                                                                                                                                                                                                                                                                                                                                                                                                                                                                                                                                                            |                                                                                                                                                                                                                                                                                                                                                                                                                                                                                                                                                                                             |                                                                                                                                                                                                                                                                                                                                                                                                                                                                                                                                                                                                                                                                                       |  |        |         |                     |                |                   |           |          |
| 42                  |                                 |                       |                         |                                                                                                                                                                                                                                                                                   |                                                                                                                                                                                                                                                                                                                                                                                      |                                                                                                             |                                                                                                                                                                                                                                                                                                                                                                                                                                                                                                                                                                                                                                                                                                                                                                                                            |                                                                                                                                                                                                                                                                                                                                                                                                                                                                                                                                                                                             |                                                                                                                                                                                                                                                                                                                                                                                                                                                                                                                                                                                                                                                                                       |  |        |         |                     |                |                   |           |          |
| 43                  |                                 |                       |                         |                                                                                                                                                                                                                                                                                   |                                                                                                                                                                                                                                                                                                                                                                                      |                                                                                                             |                                                                                                                                                                                                                                                                                                                                                                                                                                                                                                                                                                                                                                                                                                                                                                                                            |                                                                                                                                                                                                                                                                                                                                                                                                                                                                                                                                                                                             |                                                                                                                                                                                                                                                                                                                                                                                                                                                                                                                                                                                                                                                                                       |  |        |         |                     |                |                   |           |          |
| 44                  |                                 |                       |                         |                                                                                                                                                                                                                                                                                   |                                                                                                                                                                                                                                                                                                                                                                                      |                                                                                                             |                                                                                                                                                                                                                                                                                                                                                                                                                                                                                                                                                                                                                                                                                                                                                                                                            |                                                                                                                                                                                                                                                                                                                                                                                                                                                                                                                                                                                             |                                                                                                                                                                                                                                                                                                                                                                                                                                                                                                                                                                                                                                                                                       |  |        |         |                     |                |                   |           |          |
| 45                  |                                 |                       |                         |                                                                                                                                                                                                                                                                                   |                                                                                                                                                                                                                                                                                                                                                                                      |                                                                                                             |                                                                                                                                                                                                                                                                                                                                                                                                                                                                                                                                                                                                                                                                                                                                                                                                            |                                                                                                                                                                                                                                                                                                                                                                                                                                                                                                                                                                                             |                                                                                                                                                                                                                                                                                                                                                                                                                                                                                                                                                                                                                                                                                       |  |        |         |                     |                |                   |           |          |
| 46                  |                                 |                       |                         |                                                                                                                                                                                                                                                                                   |                                                                                                                                                                                                                                                                                                                                                                                      |                                                                                                             |                                                                                                                                                                                                                                                                                                                                                                                                                                                                                                                                                                                                                                                                                                                                                                                                            |                                                                                                                                                                                                                                                                                                                                                                                                                                                                                                                                                                                             |                                                                                                                                                                                                                                                                                                                                                                                                                                                                                                                                                                                                                                                                                       |  |        |         |                     |                |                   |           |          |

|                                                                                                                                                                                              |                                           |                         |                                                                             |                              |                                                                                                                                                                                                                                                                                                                                                                                                                                      |                                                                                         |                                                                                                                                                                                                                                                                                                        |                                                                                                                                                                                                                                                                                                                                                                                                                                                                                                                            |                                                                                                                                                                                                                                                                                                                                                                                                                                                                                                                                                                             |    |   |
|----------------------------------------------------------------------------------------------------------------------------------------------------------------------------------------------|-------------------------------------------|-------------------------|-----------------------------------------------------------------------------|------------------------------|--------------------------------------------------------------------------------------------------------------------------------------------------------------------------------------------------------------------------------------------------------------------------------------------------------------------------------------------------------------------------------------------------------------------------------------|-----------------------------------------------------------------------------------------|--------------------------------------------------------------------------------------------------------------------------------------------------------------------------------------------------------------------------------------------------------------------------------------------------------|----------------------------------------------------------------------------------------------------------------------------------------------------------------------------------------------------------------------------------------------------------------------------------------------------------------------------------------------------------------------------------------------------------------------------------------------------------------------------------------------------------------------------|-----------------------------------------------------------------------------------------------------------------------------------------------------------------------------------------------------------------------------------------------------------------------------------------------------------------------------------------------------------------------------------------------------------------------------------------------------------------------------------------------------------------------------------------------------------------------------|----|---|
| 1<br>2<br>3<br>4<br>5<br>6<br>7<br>8<br>9<br>10<br>11<br>12<br>13<br>14                                                                                                                      | 9. Mitchell-DiCenso et al. (1996), Canada | Mothers and fathers/482 | Mean (SD)<br>Interv: 35.1 (4.5)<br><br>Control: 35 (4.3)<br><br>/ level III | Randomised, Controlled Trial | <b>Intervention: Clinical Nurse Specialist/ neonatal practitioner team (CNS/NP) care.</b><br><br>Infants of intervention parents were assigned to be cared for by the Clinical nurse special/neonatal practitioner CNS/NP team during the day and by paediatric residents during the night.<br><br><b>Control:</b> Paediatric residents cared for infants of control parents around the clock. Neonatologists supervised both teams. | <b>Parent satisfaction with care</b>                                                    | During admission period and post discharge (twice)<br><br>- On 5 <sup>th</sup> day after admission (full survey)<br><br>- After discharge over the phone (only questions related to satisfaction with discharge process)<br><br>No pre-intervention parent satisfaction data available for comparison. | <b>Satisfaction questionnaire (Validated)</b><br><br>The study team developed and used the validated <i>Neonatal Index of Parent Satisfaction (NIPS)</i> questionnaire.<br><br><u>Number of questions:</u> not stated.<br><br>NIPS score range (27-189); higher scores indicating greater satisfaction with care.                                                                                                                                                                                                          | <b>No statistically significant difference between groups.</b><br><br><b>Interv Control p-value</b><br>NIPS 140 139 0.67<br><b>Mean</b><br><br><b>Difference in means</b> 1.0, CI (-3.6-5.6)                                                                                                                                                                                                                                                                                                                                                                                | No | 2 |
| 15<br>16<br>17<br>18<br>19<br>20<br>21<br>22<br>23<br>24<br>25<br>26<br>27<br>28<br>29<br>30<br>31<br>32<br>33<br>34<br>35<br>36<br>37<br>38<br>39<br>40<br>41<br>42<br>43<br>44<br>45<br>46 | 10. Broyles et al. (1992), USA            | Mothers /25             | Mean (SD)<br>Control: 34 (4)<br><br>Interv: 33.4 (4)<br><br>/ level III     | Randomised Controlled Trial  | <b>Intervention: Detailed consent.</b><br><br>Mothers were given information about mechanical ventilation. Detailed risk/benefit disclosure was provided both verbally and in writing.<br><br><b>Control:</b> Mothers were given a brief verbal description about mechanical ventilation supplemented with detailed verbal and written disclosure if desired by them (flexible consent).                                             | <b>Maternal satisfaction with the information provided about mechanical ventilation</b> | During babies' admission (once)<br><br>- 24-48 hours after the intervention<br><br>No pre-intervention parent satisfaction data available for comparison.                                                                                                                                              | <b>An interview</b> evaluating maternal satisfaction with the information provided about mechanical ventilation.<br><br><b>Validation:</b> A psychiatrist with a special interest in interviewing techniques was consulted in designing and standardising this assessment.<br><br>A research nurse conducted the interview, "checking" each mother against one option regarding:<br>- Amount of information: Right amount-Too much-Too little<br><br>- Information made coping: More Difficult-Easier-No effect-Uncertain. | This study is measuring and comparing satisfaction with two different interventions (detailed vs flexible consent process), neither of which formally represent the usual routine care for all babies (no control).<br><br><b>Small numbers. No data indicating statistical analysis conducted or evidence of statistically significant results.</b><br><br><b>Detailed Flexible</b><br><b>Right</b> 75% mothers 100%<br><b>amount of information</b><br><br><b>Too</b> 25% mothers<br><b>little information</b><br><br><b>Made</b> 67% mothers 69%<br><b>coping easier</b> | No | 3 |

## Non-Randomised controlled trials (Non-RCT) by publication year

| Author (Date), Country             | Parents' gender/sample Size | Infant Gestation age (GA) in weeks /NICU level                          | Study design                                                                                                                                      | Intervention                                                                                                                                                                                                                                                                                                                                                                                             | Outcome measures                                                                                                                                                                 | Timing of measurement                                                                                                                                                                                                        | Method of measurement                                                                                                                                                                                                                                                                                                                                                                                                                                                                                                                          | Results                                                                                                                                                                                                                                                                                                                                                                                                                                                                                                    | Parent co-design? | Improved parent satisfaction? |         |               |            |         |    |   |
|------------------------------------|-----------------------------|-------------------------------------------------------------------------|---------------------------------------------------------------------------------------------------------------------------------------------------|----------------------------------------------------------------------------------------------------------------------------------------------------------------------------------------------------------------------------------------------------------------------------------------------------------------------------------------------------------------------------------------------------------|----------------------------------------------------------------------------------------------------------------------------------------------------------------------------------|------------------------------------------------------------------------------------------------------------------------------------------------------------------------------------------------------------------------------|------------------------------------------------------------------------------------------------------------------------------------------------------------------------------------------------------------------------------------------------------------------------------------------------------------------------------------------------------------------------------------------------------------------------------------------------------------------------------------------------------------------------------------------------|------------------------------------------------------------------------------------------------------------------------------------------------------------------------------------------------------------------------------------------------------------------------------------------------------------------------------------------------------------------------------------------------------------------------------------------------------------------------------------------------------------|-------------------|-------------------------------|---------|---------------|------------|---------|----|---|
| 1. De Bernardo et al (2017), Italy | Mothers and Fathers /96     | Mean (SD)<br>Control: 34.2 (5.25)<br>Interv: 32.7 (5.25)<br>/ level III | Non-randomized, prospective cohort pilot study<br><br><i>Unit level effect:</i><br>Two different time periods                                     | <b>Intervention: FCC (Family-Centered Care).</b><br><br>Parents had access to NICU for 8 hours/day. The NICU was widened and paediatric nurses taught parents procedures/practices for 10 days. Parents could observe clinical bedside rounds, hold meetings with the physicians, use the rooms and kitchen.<br><br><b>Control:</b> Parents were permitted to visit their baby in NICU for 1 hour a day. | <b>Parent satisfaction relating to 3 specific domains:</b><br><br>1. Knowledge and Understanding<br><br>2. Communication and Collaboration<br><br>3. Privacy and confidentiality | During babies' admission (once)<br><br>- At discharge (pre-FCC cohort and post-FCC cohort)<br><br>No pre-intervention parent satisfaction data available for comparison (different parent groups pre and post intervention). | <b>Satisfaction questionnaire.</b><br><br><u>Validation:</u> The authors state the survey "was designed and validated by Abdel-Latif et al". No content validity or reliability testing reported in the original paper.<br><br>9 questions<br><br>3 questions: Related to adequate and timely information about the baby's condition.<br><br>3 questions: Related to communication and collaboration with the healthcare team.<br><br>3 questions: Related to respect of patient privacy.<br><br>Likert (1 strongly disagree-5 strongly agree) | <b>7/9 individual statements in the parent satisfaction questionnaire scored higher in the FCC compared to the NFCC (statistically significant difference).</b><br><br>Example statement:<br>"I have received adequate information about my baby's condition and management."<br><br><table border="1"> <thead> <tr> <th></th> <th>Interv</th> <th>Control</th> </tr> </thead> <tbody> <tr> <td><b>Median</b></td> <td>5 (3.45-5)</td> <td>4 (3-5)</td> </tr> </tbody> </table><br><b>p-value &lt;0.05</b> |                   | Interv                        | Control | <b>Median</b> | 5 (3.45-5) | 4 (3-5) | No | 1 |
|                                    | Interv                      | Control                                                                 |                                                                                                                                                   |                                                                                                                                                                                                                                                                                                                                                                                                          |                                                                                                                                                                                  |                                                                                                                                                                                                                              |                                                                                                                                                                                                                                                                                                                                                                                                                                                                                                                                                |                                                                                                                                                                                                                                                                                                                                                                                                                                                                                                            |                   |                               |         |               |            |         |    |   |
| <b>Median</b>                      | 5 (3.45-5)                  | 4 (3-5)                                                                 |                                                                                                                                                   |                                                                                                                                                                                                                                                                                                                                                                                                          |                                                                                                                                                                                  |                                                                                                                                                                                                                              |                                                                                                                                                                                                                                                                                                                                                                                                                                                                                                                                                |                                                                                                                                                                                                                                                                                                                                                                                                                                                                                                            |                   |                               |         |               |            |         |    |   |
| 2. Kadivar et al. (2017), Iran     | Mothers /68                 | <=30 - 36<br>/ level not stated                                         | Non-randomised, Convenience sampling.<br><br><i>Group level effect:</i><br>Intervention/control groups.<br><br>Pre and post-intervention testing. | <b>Intervention: Internet-based education.</b><br><br>Mothers used an educational website set up by the research team (files and clips). Mothers could visit the website from 5:00-6:00 pm for 10 days. They were also allowed to use the website outside of the above hours and to report the duration of using the website to the researcher. Mothers had                                              | <b>Maternal satisfaction</b>                                                                                                                                                     | During babies' admission (twice)<br><br>- Day 1 of intervention<br><br>- Day 10 of intervention                                                                                                                              | <b>Satisfaction questionnaire (Validated)</b><br><br>The "What Being The Parent of a Baby is Like-Revised" Questionnaire (WBPL- Revised) was used. The original English version by Pridham and Chang was translated to Persian.<br><br>11 questions<br><br>Total satisfaction score range (11-99)                                                                                                                                                                                                                                              | There was a significant difference in the mean score of satisfaction between cases and controls while the mean score of satisfaction increased in both groups.<br><br><b>Comparison of the mean score between the two groups showed that the level of satisfaction was significantly higher in the case group versus the control group.</b>                                                                                                                                                                | No                | 1                             |         |               |            |         |    |   |

|                                |               |                                                                                         |                                                                                                                                                |                                                                                                                                                                                                                                                                                                 |                                                                                                                                           |                                                                                                                                                 |                                                                                                                                                                                                                                                                                             |                                                                                                                                                                                                                                                                                                                                                                                                                                                                                                                                                               |    |   |
|--------------------------------|---------------|-----------------------------------------------------------------------------------------|------------------------------------------------------------------------------------------------------------------------------------------------|-------------------------------------------------------------------------------------------------------------------------------------------------------------------------------------------------------------------------------------------------------------------------------------------------|-------------------------------------------------------------------------------------------------------------------------------------------|-------------------------------------------------------------------------------------------------------------------------------------------------|---------------------------------------------------------------------------------------------------------------------------------------------------------------------------------------------------------------------------------------------------------------------------------------------|---------------------------------------------------------------------------------------------------------------------------------------------------------------------------------------------------------------------------------------------------------------------------------------------------------------------------------------------------------------------------------------------------------------------------------------------------------------------------------------------------------------------------------------------------------------|----|---|
|                                |               |                                                                                         |                                                                                                                                                | to use the website at least 3 times during 10 days, each time for at least 30 min.<br><br><u>Control:</u> Mothers in the control group received the routine education provided in the NICU.                                                                                                     |                                                                                                                                           |                                                                                                                                                 |                                                                                                                                                                                                                                                                                             | <p style="text-align: center;"><b>Interv Control</b></p> <p><b>before intervention</b><br/>Mean 81.62(13.50) 85.71(9.46)<br/><b>(SD)</b><br/>p-value 0.993</p> <p><b>after intervention</b><br/>Mean 93.88 (5.38) 90.12 (7.78)<br/><b>(SD)</b><br/>p-value 0.024</p>                                                                                                                                                                                                                                                                                          |    |   |
| 3. Kadivar et al. (2017), Iran | Mothers /70   | Mean (SD)<br><br>Control 31.6 (2.4)<br><br>Interv: 32.9 (3.1)<br><br>/ level not stated | Non-randomised, Convenience sampling.<br><br><i>Unit level effect:</i><br>Two different time periods                                           | <u>Intervention: Narrative writing.</u><br><br>Mothers did narrative writing at least 3 times until the 10th day of admission.<br><br><u>Control:</u> Mothers in the control group received the routine NICU treatment and care.                                                                | <b>Mothers' satisfaction with medical care provided by physicians, medical students, and nurses during neonatal admission to the NICU</b> | During babies' admission (twice)<br><br>- Day 3 of intervention<br><br>- Day 10 of intervention                                                 | <i>Satisfaction questionnaire (Validated)</i><br><br>The NIPS questionnaire by Mitchell et al was used and translated to Persian.<br><br>24 questions (Likert scale)<br><br>Likert (1 always or not satisfied-7 never or completely satisfied). A higher score indicates more satisfaction. | <b>The satisfaction level of the mothers in the intervention group increased significantly during the study.</b><br><br>The results of independent t test showed a significant difference in the satisfaction changes of the mothers on the 3rd and 10th day of NICU admission between intervention and control groups, indicating the effectiveness of narrative writing.<br><br>The results of paired t-test also showed a significant difference in the mean satisfaction level of the mothers between the 3rd and the 10th day in the intervention group. | No | 1 |
| 4. Garingo et al. (2016), USA  | Not stated /9 | 23-39 / level III                                                                       | Non-randomised, Convenience sampling.<br><br><i>Group level effect:</i><br>Intervention/ control groups<br><br>Post-intervention group testing | <u>Intervention: Tele-rounding.</u><br><br>Infants of intervention parents were cared for by an OFFSN (off site neonatologist) who was present via a remote-controlled robot. The OFFSN assessed infants via the robot's integrated stethoscope, with assistance from the nursing staff. During | <b>Satisfaction with telemedicine</b>                                                                                                     | During babies' admission (once)<br><br>- At the time of discharge<br><br>No pre-intervention parent satisfaction data available for comparison. | <i>Satisfaction questionnaire</i><br><br><u>Validation:</u> No content validity or reliability testing reported.<br><br><u>Number of questions:</u> not stated.<br><br>Likert (1 excellent-5 very poor).                                                                                    | <b>Only the intervention group was assessed and only post-intervention.</b><br><br>The authors reported that the parents surveyed were "satisfied with their experience. 100% responded that they felt comfortable talking to the OFFSN on the mobile robot and would allow their infant or themselves to be cared for by a physician via telemedicine in the future."                                                                                                                                                                                        | No | 4 |



|                  |                                 |                                                  |                                    |                                                                                                                                                                                                                                                                |                                                                                                                                                                                                                                                                                                                                                                                                                                                                                                                                                                                                                          |                                                                                                                                                                                                  |                                                                                                                                                                                                               |                                                                                                                                                                                                                                                                                                                                                                                                                                                                                                                                                                                                                                                                                                                                                                                                                                                           |                                                                                                                                                                                                                                                                                                                                                                                                                                                                                                                                                                                                                                                                                                                                                                                                                                                                                                                                                                                                                                                     |  |                 |                |                  |           |           |                |      |  |           |          |
|------------------|---------------------------------|--------------------------------------------------|------------------------------------|----------------------------------------------------------------------------------------------------------------------------------------------------------------------------------------------------------------------------------------------------------------|--------------------------------------------------------------------------------------------------------------------------------------------------------------------------------------------------------------------------------------------------------------------------------------------------------------------------------------------------------------------------------------------------------------------------------------------------------------------------------------------------------------------------------------------------------------------------------------------------------------------------|--------------------------------------------------------------------------------------------------------------------------------------------------------------------------------------------------|---------------------------------------------------------------------------------------------------------------------------------------------------------------------------------------------------------------|-----------------------------------------------------------------------------------------------------------------------------------------------------------------------------------------------------------------------------------------------------------------------------------------------------------------------------------------------------------------------------------------------------------------------------------------------------------------------------------------------------------------------------------------------------------------------------------------------------------------------------------------------------------------------------------------------------------------------------------------------------------------------------------------------------------------------------------------------------------|-----------------------------------------------------------------------------------------------------------------------------------------------------------------------------------------------------------------------------------------------------------------------------------------------------------------------------------------------------------------------------------------------------------------------------------------------------------------------------------------------------------------------------------------------------------------------------------------------------------------------------------------------------------------------------------------------------------------------------------------------------------------------------------------------------------------------------------------------------------------------------------------------------------------------------------------------------------------------------------------------------------------------------------------------------|--|-----------------|----------------|------------------|-----------|-----------|----------------|------|--|-----------|----------|
| 1                |                                 |                                                  | only                               | routine hours the OFFSN was called to discuss any issues with the patient. Emergencies/out of hours were covered by an ONSN (on site neonatologist).                                                                                                           |                                                                                                                                                                                                                                                                                                                                                                                                                                                                                                                                                                                                                          |                                                                                                                                                                                                  |                                                                                                                                                                                                               |                                                                                                                                                                                                                                                                                                                                                                                                                                                                                                                                                                                                                                                                                                                                                                                                                                                           |                                                                                                                                                                                                                                                                                                                                                                                                                                                                                                                                                                                                                                                                                                                                                                                                                                                                                                                                                                                                                                                     |  |                 |                |                  |           |           |                |      |  |           |          |
| 2                |                                 |                                                  |                                    | <u>Control:</u> Infants of control parents received ONSN care. The attending neonatologist made daily patient rounds with the NICU team. After patient rounds, the NICU staff, under the supervision of the attending neonatologist implemented the care plan. |                                                                                                                                                                                                                                                                                                                                                                                                                                                                                                                                                                                                                          |                                                                                                                                                                                                  |                                                                                                                                                                                                               |                                                                                                                                                                                                                                                                                                                                                                                                                                                                                                                                                                                                                                                                                                                                                                                                                                                           |                                                                                                                                                                                                                                                                                                                                                                                                                                                                                                                                                                                                                                                                                                                                                                                                                                                                                                                                                                                                                                                     |  |                 |                |                  |           |           |                |      |  |           |          |
| 3                |                                 |                                                  |                                    |                                                                                                                                                                                                                                                                |                                                                                                                                                                                                                                                                                                                                                                                                                                                                                                                                                                                                                          |                                                                                                                                                                                                  |                                                                                                                                                                                                               |                                                                                                                                                                                                                                                                                                                                                                                                                                                                                                                                                                                                                                                                                                                                                                                                                                                           |                                                                                                                                                                                                                                                                                                                                                                                                                                                                                                                                                                                                                                                                                                                                                                                                                                                                                                                                                                                                                                                     |  |                 |                |                  |           |           |                |      |  |           |          |
| 4                |                                 |                                                  |                                    |                                                                                                                                                                                                                                                                |                                                                                                                                                                                                                                                                                                                                                                                                                                                                                                                                                                                                                          |                                                                                                                                                                                                  |                                                                                                                                                                                                               |                                                                                                                                                                                                                                                                                                                                                                                                                                                                                                                                                                                                                                                                                                                                                                                                                                                           |                                                                                                                                                                                                                                                                                                                                                                                                                                                                                                                                                                                                                                                                                                                                                                                                                                                                                                                                                                                                                                                     |  |                 |                |                  |           |           |                |      |  |           |          |
| 5                |                                 |                                                  |                                    |                                                                                                                                                                                                                                                                |                                                                                                                                                                                                                                                                                                                                                                                                                                                                                                                                                                                                                          |                                                                                                                                                                                                  |                                                                                                                                                                                                               |                                                                                                                                                                                                                                                                                                                                                                                                                                                                                                                                                                                                                                                                                                                                                                                                                                                           |                                                                                                                                                                                                                                                                                                                                                                                                                                                                                                                                                                                                                                                                                                                                                                                                                                                                                                                                                                                                                                                     |  |                 |                |                  |           |           |                |      |  |           |          |
| 6                |                                 |                                                  |                                    |                                                                                                                                                                                                                                                                |                                                                                                                                                                                                                                                                                                                                                                                                                                                                                                                                                                                                                          |                                                                                                                                                                                                  |                                                                                                                                                                                                               |                                                                                                                                                                                                                                                                                                                                                                                                                                                                                                                                                                                                                                                                                                                                                                                                                                                           |                                                                                                                                                                                                                                                                                                                                                                                                                                                                                                                                                                                                                                                                                                                                                                                                                                                                                                                                                                                                                                                     |  |                 |                |                  |           |           |                |      |  |           |          |
| 7                |                                 |                                                  |                                    |                                                                                                                                                                                                                                                                |                                                                                                                                                                                                                                                                                                                                                                                                                                                                                                                                                                                                                          |                                                                                                                                                                                                  |                                                                                                                                                                                                               |                                                                                                                                                                                                                                                                                                                                                                                                                                                                                                                                                                                                                                                                                                                                                                                                                                                           |                                                                                                                                                                                                                                                                                                                                                                                                                                                                                                                                                                                                                                                                                                                                                                                                                                                                                                                                                                                                                                                     |  |                 |                |                  |           |           |                |      |  |           |          |
| 8                |                                 |                                                  |                                    |                                                                                                                                                                                                                                                                |                                                                                                                                                                                                                                                                                                                                                                                                                                                                                                                                                                                                                          |                                                                                                                                                                                                  |                                                                                                                                                                                                               |                                                                                                                                                                                                                                                                                                                                                                                                                                                                                                                                                                                                                                                                                                                                                                                                                                                           |                                                                                                                                                                                                                                                                                                                                                                                                                                                                                                                                                                                                                                                                                                                                                                                                                                                                                                                                                                                                                                                     |  |                 |                |                  |           |           |                |      |  |           |          |
| 9                |                                 |                                                  |                                    |                                                                                                                                                                                                                                                                |                                                                                                                                                                                                                                                                                                                                                                                                                                                                                                                                                                                                                          |                                                                                                                                                                                                  |                                                                                                                                                                                                               |                                                                                                                                                                                                                                                                                                                                                                                                                                                                                                                                                                                                                                                                                                                                                                                                                                                           |                                                                                                                                                                                                                                                                                                                                                                                                                                                                                                                                                                                                                                                                                                                                                                                                                                                                                                                                                                                                                                                     |  |                 |                |                  |           |           |                |      |  |           |          |
| 10               |                                 |                                                  |                                    |                                                                                                                                                                                                                                                                |                                                                                                                                                                                                                                                                                                                                                                                                                                                                                                                                                                                                                          |                                                                                                                                                                                                  |                                                                                                                                                                                                               |                                                                                                                                                                                                                                                                                                                                                                                                                                                                                                                                                                                                                                                                                                                                                                                                                                                           |                                                                                                                                                                                                                                                                                                                                                                                                                                                                                                                                                                                                                                                                                                                                                                                                                                                                                                                                                                                                                                                     |  |                 |                |                  |           |           |                |      |  |           |          |
| 11               |                                 |                                                  |                                    |                                                                                                                                                                                                                                                                |                                                                                                                                                                                                                                                                                                                                                                                                                                                                                                                                                                                                                          |                                                                                                                                                                                                  |                                                                                                                                                                                                               |                                                                                                                                                                                                                                                                                                                                                                                                                                                                                                                                                                                                                                                                                                                                                                                                                                                           |                                                                                                                                                                                                                                                                                                                                                                                                                                                                                                                                                                                                                                                                                                                                                                                                                                                                                                                                                                                                                                                     |  |                 |                |                  |           |           |                |      |  |           |          |
| 12               |                                 |                                                  |                                    |                                                                                                                                                                                                                                                                |                                                                                                                                                                                                                                                                                                                                                                                                                                                                                                                                                                                                                          |                                                                                                                                                                                                  |                                                                                                                                                                                                               |                                                                                                                                                                                                                                                                                                                                                                                                                                                                                                                                                                                                                                                                                                                                                                                                                                                           |                                                                                                                                                                                                                                                                                                                                                                                                                                                                                                                                                                                                                                                                                                                                                                                                                                                                                                                                                                                                                                                     |  |                 |                |                  |           |           |                |      |  |           |          |
| 13               |                                 |                                                  |                                    |                                                                                                                                                                                                                                                                |                                                                                                                                                                                                                                                                                                                                                                                                                                                                                                                                                                                                                          |                                                                                                                                                                                                  |                                                                                                                                                                                                               |                                                                                                                                                                                                                                                                                                                                                                                                                                                                                                                                                                                                                                                                                                                                                                                                                                                           |                                                                                                                                                                                                                                                                                                                                                                                                                                                                                                                                                                                                                                                                                                                                                                                                                                                                                                                                                                                                                                                     |  |                 |                |                  |           |           |                |      |  |           |          |
| 14               |                                 |                                                  |                                    |                                                                                                                                                                                                                                                                |                                                                                                                                                                                                                                                                                                                                                                                                                                                                                                                                                                                                                          |                                                                                                                                                                                                  |                                                                                                                                                                                                               |                                                                                                                                                                                                                                                                                                                                                                                                                                                                                                                                                                                                                                                                                                                                                                                                                                                           |                                                                                                                                                                                                                                                                                                                                                                                                                                                                                                                                                                                                                                                                                                                                                                                                                                                                                                                                                                                                                                                     |  |                 |                |                  |           |           |                |      |  |           |          |
| 15               | 5. Globus et al. (2016), Israel | Mothers and fathers /Total surveys returned: 178 | ~40% in each group <32 / level III | Non-randomised, Convenience sampling.<br><br><i>Unit level effect:</i><br>Two different time periods                                                                                                                                                           | <u>Intervention:</u> <b>SMS-Short Message Services Implementation.</b><br><br>Parents were updated daily regarding the health status of their infant via SMS (short-message-services) from the Electronic Patient Record. All SMS messages were sent at 09:00am, including one-sentence sections with updated information (e.g. location of the infant's crib and current weight). Information regarding acute events/deterioration of the infant's medical condition was not included in the SMS, but was delivered personally to the parents in real time.<br><br><u>Control:</u> Routine care pre-SMS implementation. | <b>1. Parent satisfaction related to parent communication with the medical staff</b><br><br><b>2. Overall parent satisfaction with treatment and staff attitudes throughout hospitalisation.</b> | During babies' admission (once)<br><br>- pre-SMS cohort and post-SMS cohort<br><br>No pre-intervention parent satisfaction data available for comparison (different parent groups pre and post intervention). | <i>Satisfaction questionnaire</i><br><br>The "Parents' attitudes regarding their experience during their infants' hospitalisation in the NICU" questionnaire was used, as well as selected items from a literature review of similar questionnaires, including that by York Hospital and by Conner and Nelson.<br><br><u>Validation:</u> No content validity or reliability testing reported.<br><br>Selected items related to four aspects of the NICU experience. 2 out of 4 directly assessed parent satisfaction:<br><br>1. Parental assessment of their communication with the medical staff.<br><br>Likert scale (1 do not agree at all-5 strongly agree)<br><br>2. Overall satisfaction with treatment and staff attitudes throughout hospitalisation.<br><br>Visual analog scale (scores range 0-10). Higher scores reflect greater satisfaction. | Overall, in both periods, parents expressed a high degree of satisfaction regarding the medical treatment, the information given and the communication with the medical staff. Overall satisfaction with treatment and with staff attitudes throughout hospitalisation was slightly greater in the post-SMS cohort but did not reach statistical significance.<br><br><b>In the post-SMS cohort, a statistically significant improvement was noted regarding physician availability and patience, parental feelings of comfort in approaching the physicians and nurses, and regularly receiving information regarding the infants' medical status from the physicians.</b><br><br><table border="0"> <tr> <td></td> <td><b>Post SMS</b></td> <td><b>Pre SMS</b></td> </tr> <tr> <td><b>Mean (SD)</b></td> <td>4.1 (1.0)</td> <td>3.7 (1.3)</td> </tr> <tr> <td><b>p-value</b></td> <td colspan="2">0.03</td> </tr> </table><br><i>Specific question: "I was pleased with the frequency with which I received information regarding my infant".</i> |  | <b>Post SMS</b> | <b>Pre SMS</b> | <b>Mean (SD)</b> | 4.1 (1.0) | 3.7 (1.3) | <b>p-value</b> | 0.03 |  | <b>No</b> | <b>1</b> |
|                  | <b>Post SMS</b>                 | <b>Pre SMS</b>                                   |                                    |                                                                                                                                                                                                                                                                |                                                                                                                                                                                                                                                                                                                                                                                                                                                                                                                                                                                                                          |                                                                                                                                                                                                  |                                                                                                                                                                                                               |                                                                                                                                                                                                                                                                                                                                                                                                                                                                                                                                                                                                                                                                                                                                                                                                                                                           |                                                                                                                                                                                                                                                                                                                                                                                                                                                                                                                                                                                                                                                                                                                                                                                                                                                                                                                                                                                                                                                     |  |                 |                |                  |           |           |                |      |  |           |          |
| <b>Mean (SD)</b> | 4.1 (1.0)                       | 3.7 (1.3)                                        |                                    |                                                                                                                                                                                                                                                                |                                                                                                                                                                                                                                                                                                                                                                                                                                                                                                                                                                                                                          |                                                                                                                                                                                                  |                                                                                                                                                                                                               |                                                                                                                                                                                                                                                                                                                                                                                                                                                                                                                                                                                                                                                                                                                                                                                                                                                           |                                                                                                                                                                                                                                                                                                                                                                                                                                                                                                                                                                                                                                                                                                                                                                                                                                                                                                                                                                                                                                                     |  |                 |                |                  |           |           |                |      |  |           |          |
| <b>p-value</b>   | 0.03                            |                                                  |                                    |                                                                                                                                                                                                                                                                |                                                                                                                                                                                                                                                                                                                                                                                                                                                                                                                                                                                                                          |                                                                                                                                                                                                  |                                                                                                                                                                                                               |                                                                                                                                                                                                                                                                                                                                                                                                                                                                                                                                                                                                                                                                                                                                                                                                                                                           |                                                                                                                                                                                                                                                                                                                                                                                                                                                                                                                                                                                                                                                                                                                                                                                                                                                                                                                                                                                                                                                     |  |                 |                |                  |           |           |                |      |  |           |          |
| 16               |                                 |                                                  |                                    |                                                                                                                                                                                                                                                                |                                                                                                                                                                                                                                                                                                                                                                                                                                                                                                                                                                                                                          |                                                                                                                                                                                                  |                                                                                                                                                                                                               |                                                                                                                                                                                                                                                                                                                                                                                                                                                                                                                                                                                                                                                                                                                                                                                                                                                           |                                                                                                                                                                                                                                                                                                                                                                                                                                                                                                                                                                                                                                                                                                                                                                                                                                                                                                                                                                                                                                                     |  |                 |                |                  |           |           |                |      |  |           |          |
| 17               |                                 |                                                  |                                    |                                                                                                                                                                                                                                                                |                                                                                                                                                                                                                                                                                                                                                                                                                                                                                                                                                                                                                          |                                                                                                                                                                                                  |                                                                                                                                                                                                               |                                                                                                                                                                                                                                                                                                                                                                                                                                                                                                                                                                                                                                                                                                                                                                                                                                                           |                                                                                                                                                                                                                                                                                                                                                                                                                                                                                                                                                                                                                                                                                                                                                                                                                                                                                                                                                                                                                                                     |  |                 |                |                  |           |           |                |      |  |           |          |
| 18               |                                 |                                                  |                                    |                                                                                                                                                                                                                                                                |                                                                                                                                                                                                                                                                                                                                                                                                                                                                                                                                                                                                                          |                                                                                                                                                                                                  |                                                                                                                                                                                                               |                                                                                                                                                                                                                                                                                                                                                                                                                                                                                                                                                                                                                                                                                                                                                                                                                                                           |                                                                                                                                                                                                                                                                                                                                                                                                                                                                                                                                                                                                                                                                                                                                                                                                                                                                                                                                                                                                                                                     |  |                 |                |                  |           |           |                |      |  |           |          |
| 19               |                                 |                                                  |                                    |                                                                                                                                                                                                                                                                |                                                                                                                                                                                                                                                                                                                                                                                                                                                                                                                                                                                                                          |                                                                                                                                                                                                  |                                                                                                                                                                                                               |                                                                                                                                                                                                                                                                                                                                                                                                                                                                                                                                                                                                                                                                                                                                                                                                                                                           |                                                                                                                                                                                                                                                                                                                                                                                                                                                                                                                                                                                                                                                                                                                                                                                                                                                                                                                                                                                                                                                     |  |                 |                |                  |           |           |                |      |  |           |          |
| 20               |                                 |                                                  |                                    |                                                                                                                                                                                                                                                                |                                                                                                                                                                                                                                                                                                                                                                                                                                                                                                                                                                                                                          |                                                                                                                                                                                                  |                                                                                                                                                                                                               |                                                                                                                                                                                                                                                                                                                                                                                                                                                                                                                                                                                                                                                                                                                                                                                                                                                           |                                                                                                                                                                                                                                                                                                                                                                                                                                                                                                                                                                                                                                                                                                                                                                                                                                                                                                                                                                                                                                                     |  |                 |                |                  |           |           |                |      |  |           |          |
| 21               |                                 |                                                  |                                    |                                                                                                                                                                                                                                                                |                                                                                                                                                                                                                                                                                                                                                                                                                                                                                                                                                                                                                          |                                                                                                                                                                                                  |                                                                                                                                                                                                               |                                                                                                                                                                                                                                                                                                                                                                                                                                                                                                                                                                                                                                                                                                                                                                                                                                                           |                                                                                                                                                                                                                                                                                                                                                                                                                                                                                                                                                                                                                                                                                                                                                                                                                                                                                                                                                                                                                                                     |  |                 |                |                  |           |           |                |      |  |           |          |
| 22               |                                 |                                                  |                                    |                                                                                                                                                                                                                                                                |                                                                                                                                                                                                                                                                                                                                                                                                                                                                                                                                                                                                                          |                                                                                                                                                                                                  |                                                                                                                                                                                                               |                                                                                                                                                                                                                                                                                                                                                                                                                                                                                                                                                                                                                                                                                                                                                                                                                                                           |                                                                                                                                                                                                                                                                                                                                                                                                                                                                                                                                                                                                                                                                                                                                                                                                                                                                                                                                                                                                                                                     |  |                 |                |                  |           |           |                |      |  |           |          |
| 23               |                                 |                                                  |                                    |                                                                                                                                                                                                                                                                |                                                                                                                                                                                                                                                                                                                                                                                                                                                                                                                                                                                                                          |                                                                                                                                                                                                  |                                                                                                                                                                                                               |                                                                                                                                                                                                                                                                                                                                                                                                                                                                                                                                                                                                                                                                                                                                                                                                                                                           |                                                                                                                                                                                                                                                                                                                                                                                                                                                                                                                                                                                                                                                                                                                                                                                                                                                                                                                                                                                                                                                     |  |                 |                |                  |           |           |                |      |  |           |          |
| 24               |                                 |                                                  |                                    |                                                                                                                                                                                                                                                                |                                                                                                                                                                                                                                                                                                                                                                                                                                                                                                                                                                                                                          |                                                                                                                                                                                                  |                                                                                                                                                                                                               |                                                                                                                                                                                                                                                                                                                                                                                                                                                                                                                                                                                                                                                                                                                                                                                                                                                           |                                                                                                                                                                                                                                                                                                                                                                                                                                                                                                                                                                                                                                                                                                                                                                                                                                                                                                                                                                                                                                                     |  |                 |                |                  |           |           |                |      |  |           |          |
| 25               |                                 |                                                  |                                    |                                                                                                                                                                                                                                                                |                                                                                                                                                                                                                                                                                                                                                                                                                                                                                                                                                                                                                          |                                                                                                                                                                                                  |                                                                                                                                                                                                               |                                                                                                                                                                                                                                                                                                                                                                                                                                                                                                                                                                                                                                                                                                                                                                                                                                                           |                                                                                                                                                                                                                                                                                                                                                                                                                                                                                                                                                                                                                                                                                                                                                                                                                                                                                                                                                                                                                                                     |  |                 |                |                  |           |           |                |      |  |           |          |
| 26               |                                 |                                                  |                                    |                                                                                                                                                                                                                                                                |                                                                                                                                                                                                                                                                                                                                                                                                                                                                                                                                                                                                                          |                                                                                                                                                                                                  |                                                                                                                                                                                                               |                                                                                                                                                                                                                                                                                                                                                                                                                                                                                                                                                                                                                                                                                                                                                                                                                                                           |                                                                                                                                                                                                                                                                                                                                                                                                                                                                                                                                                                                                                                                                                                                                                                                                                                                                                                                                                                                                                                                     |  |                 |                |                  |           |           |                |      |  |           |          |
| 27               |                                 |                                                  |                                    |                                                                                                                                                                                                                                                                |                                                                                                                                                                                                                                                                                                                                                                                                                                                                                                                                                                                                                          |                                                                                                                                                                                                  |                                                                                                                                                                                                               |                                                                                                                                                                                                                                                                                                                                                                                                                                                                                                                                                                                                                                                                                                                                                                                                                                                           |                                                                                                                                                                                                                                                                                                                                                                                                                                                                                                                                                                                                                                                                                                                                                                                                                                                                                                                                                                                                                                                     |  |                 |                |                  |           |           |                |      |  |           |          |
| 28               |                                 |                                                  |                                    |                                                                                                                                                                                                                                                                |                                                                                                                                                                                                                                                                                                                                                                                                                                                                                                                                                                                                                          |                                                                                                                                                                                                  |                                                                                                                                                                                                               |                                                                                                                                                                                                                                                                                                                                                                                                                                                                                                                                                                                                                                                                                                                                                                                                                                                           |                                                                                                                                                                                                                                                                                                                                                                                                                                                                                                                                                                                                                                                                                                                                                                                                                                                                                                                                                                                                                                                     |  |                 |                |                  |           |           |                |      |  |           |          |
| 29               |                                 |                                                  |                                    |                                                                                                                                                                                                                                                                |                                                                                                                                                                                                                                                                                                                                                                                                                                                                                                                                                                                                                          |                                                                                                                                                                                                  |                                                                                                                                                                                                               |                                                                                                                                                                                                                                                                                                                                                                                                                                                                                                                                                                                                                                                                                                                                                                                                                                                           |                                                                                                                                                                                                                                                                                                                                                                                                                                                                                                                                                                                                                                                                                                                                                                                                                                                                                                                                                                                                                                                     |  |                 |                |                  |           |           |                |      |  |           |          |
| 30               |                                 |                                                  |                                    |                                                                                                                                                                                                                                                                |                                                                                                                                                                                                                                                                                                                                                                                                                                                                                                                                                                                                                          |                                                                                                                                                                                                  |                                                                                                                                                                                                               |                                                                                                                                                                                                                                                                                                                                                                                                                                                                                                                                                                                                                                                                                                                                                                                                                                                           |                                                                                                                                                                                                                                                                                                                                                                                                                                                                                                                                                                                                                                                                                                                                                                                                                                                                                                                                                                                                                                                     |  |                 |                |                  |           |           |                |      |  |           |          |
| 31               |                                 |                                                  |                                    |                                                                                                                                                                                                                                                                |                                                                                                                                                                                                                                                                                                                                                                                                                                                                                                                                                                                                                          |                                                                                                                                                                                                  |                                                                                                                                                                                                               |                                                                                                                                                                                                                                                                                                                                                                                                                                                                                                                                                                                                                                                                                                                                                                                                                                                           |                                                                                                                                                                                                                                                                                                                                                                                                                                                                                                                                                                                                                                                                                                                                                                                                                                                                                                                                                                                                                                                     |  |                 |                |                  |           |           |                |      |  |           |          |
| 32               |                                 |                                                  |                                    |                                                                                                                                                                                                                                                                |                                                                                                                                                                                                                                                                                                                                                                                                                                                                                                                                                                                                                          |                                                                                                                                                                                                  |                                                                                                                                                                                                               |                                                                                                                                                                                                                                                                                                                                                                                                                                                                                                                                                                                                                                                                                                                                                                                                                                                           |                                                                                                                                                                                                                                                                                                                                                                                                                                                                                                                                                                                                                                                                                                                                                                                                                                                                                                                                                                                                                                                     |  |                 |                |                  |           |           |                |      |  |           |          |
| 33               |                                 |                                                  |                                    |                                                                                                                                                                                                                                                                |                                                                                                                                                                                                                                                                                                                                                                                                                                                                                                                                                                                                                          |                                                                                                                                                                                                  |                                                                                                                                                                                                               |                                                                                                                                                                                                                                                                                                                                                                                                                                                                                                                                                                                                                                                                                                                                                                                                                                                           |                                                                                                                                                                                                                                                                                                                                                                                                                                                                                                                                                                                                                                                                                                                                                                                                                                                                                                                                                                                                                                                     |  |                 |                |                  |           |           |                |      |  |           |          |
| 34               |                                 |                                                  |                                    |                                                                                                                                                                                                                                                                |                                                                                                                                                                                                                                                                                                                                                                                                                                                                                                                                                                                                                          |                                                                                                                                                                                                  |                                                                                                                                                                                                               |                                                                                                                                                                                                                                                                                                                                                                                                                                                                                                                                                                                                                                                                                                                                                                                                                                                           |                                                                                                                                                                                                                                                                                                                                                                                                                                                                                                                                                                                                                                                                                                                                                                                                                                                                                                                                                                                                                                                     |  |                 |                |                  |           |           |                |      |  |           |          |
| 35               |                                 |                                                  |                                    |                                                                                                                                                                                                                                                                |                                                                                                                                                                                                                                                                                                                                                                                                                                                                                                                                                                                                                          |                                                                                                                                                                                                  |                                                                                                                                                                                                               |                                                                                                                                                                                                                                                                                                                                                                                                                                                                                                                                                                                                                                                                                                                                                                                                                                                           |                                                                                                                                                                                                                                                                                                                                                                                                                                                                                                                                                                                                                                                                                                                                                                                                                                                                                                                                                                                                                                                     |  |                 |                |                  |           |           |                |      |  |           |          |
| 36               |                                 |                                                  |                                    |                                                                                                                                                                                                                                                                |                                                                                                                                                                                                                                                                                                                                                                                                                                                                                                                                                                                                                          |                                                                                                                                                                                                  |                                                                                                                                                                                                               |                                                                                                                                                                                                                                                                                                                                                                                                                                                                                                                                                                                                                                                                                                                                                                                                                                                           |                                                                                                                                                                                                                                                                                                                                                                                                                                                                                                                                                                                                                                                                                                                                                                                                                                                                                                                                                                                                                                                     |  |                 |                |                  |           |           |                |      |  |           |          |
| 37               |                                 |                                                  |                                    |                                                                                                                                                                                                                                                                |                                                                                                                                                                                                                                                                                                                                                                                                                                                                                                                                                                                                                          |                                                                                                                                                                                                  |                                                                                                                                                                                                               |                                                                                                                                                                                                                                                                                                                                                                                                                                                                                                                                                                                                                                                                                                                                                                                                                                                           |                                                                                                                                                                                                                                                                                                                                                                                                                                                                                                                                                                                                                                                                                                                                                                                                                                                                                                                                                                                                                                                     |  |                 |                |                  |           |           |                |      |  |           |          |
| 38               |                                 |                                                  |                                    |                                                                                                                                                                                                                                                                |                                                                                                                                                                                                                                                                                                                                                                                                                                                                                                                                                                                                                          |                                                                                                                                                                                                  |                                                                                                                                                                                                               |                                                                                                                                                                                                                                                                                                                                                                                                                                                                                                                                                                                                                                                                                                                                                                                                                                                           |                                                                                                                                                                                                                                                                                                                                                                                                                                                                                                                                                                                                                                                                                                                                                                                                                                                                                                                                                                                                                                                     |  |                 |                |                  |           |           |                |      |  |           |          |
| 39               |                                 |                                                  |                                    |                                                                                                                                                                                                                                                                |                                                                                                                                                                                                                                                                                                                                                                                                                                                                                                                                                                                                                          |                                                                                                                                                                                                  |                                                                                                                                                                                                               |                                                                                                                                                                                                                                                                                                                                                                                                                                                                                                                                                                                                                                                                                                                                                                                                                                                           |                                                                                                                                                                                                                                                                                                                                                                                                                                                                                                                                                                                                                                                                                                                                                                                                                                                                                                                                                                                                                                                     |  |                 |                |                  |           |           |                |      |  |           |          |
| 40               |                                 |                                                  |                                    |                                                                                                                                                                                                                                                                |                                                                                                                                                                                                                                                                                                                                                                                                                                                                                                                                                                                                                          |                                                                                                                                                                                                  |                                                                                                                                                                                                               |                                                                                                                                                                                                                                                                                                                                                                                                                                                                                                                                                                                                                                                                                                                                                                                                                                                           |                                                                                                                                                                                                                                                                                                                                                                                                                                                                                                                                                                                                                                                                                                                                                                                                                                                                                                                                                                                                                                                     |  |                 |                |                  |           |           |                |      |  |           |          |
| 41               |                                 |                                                  |                                    |                                                                                                                                                                                                                                                                |                                                                                                                                                                                                                                                                                                                                                                                                                                                                                                                                                                                                                          |                                                                                                                                                                                                  |                                                                                                                                                                                                               |                                                                                                                                                                                                                                                                                                                                                                                                                                                                                                                                                                                                                                                                                                                                                                                                                                                           |                                                                                                                                                                                                                                                                                                                                                                                                                                                                                                                                                                                                                                                                                                                                                                                                                                                                                                                                                                                                                                                     |  |                 |                |                  |           |           |                |      |  |           |          |
| 42               |                                 |                                                  |                                    |                                                                                                                                                                                                                                                                |                                                                                                                                                                                                                                                                                                                                                                                                                                                                                                                                                                                                                          |                                                                                                                                                                                                  |                                                                                                                                                                                                               |                                                                                                                                                                                                                                                                                                                                                                                                                                                                                                                                                                                                                                                                                                                                                                                                                                                           |                                                                                                                                                                                                                                                                                                                                                                                                                                                                                                                                                                                                                                                                                                                                                                                                                                                                                                                                                                                                                                                     |  |                 |                |                  |           |           |                |      |  |           |          |
| 43               |                                 |                                                  |                                    |                                                                                                                                                                                                                                                                |                                                                                                                                                                                                                                                                                                                                                                                                                                                                                                                                                                                                                          |                                                                                                                                                                                                  |                                                                                                                                                                                                               |                                                                                                                                                                                                                                                                                                                                                                                                                                                                                                                                                                                                                                                                                                                                                                                                                                                           |                                                                                                                                                                                                                                                                                                                                                                                                                                                                                                                                                                                                                                                                                                                                                                                                                                                                                                                                                                                                                                                     |  |                 |                |                  |           |           |                |      |  |           |          |
| 44               |                                 |                                                  |                                    |                                                                                                                                                                                                                                                                |                                                                                                                                                                                                                                                                                                                                                                                                                                                                                                                                                                                                                          |                                                                                                                                                                                                  |                                                                                                                                                                                                               |                                                                                                                                                                                                                                                                                                                                                                                                                                                                                                                                                                                                                                                                                                                                                                                                                                                           |                                                                                                                                                                                                                                                                                                                                                                                                                                                                                                                                                                                                                                                                                                                                                                                                                                                                                                                                                                                                                                                     |  |                 |                |                  |           |           |                |      |  |           |          |
| 45               |                                 |                                                  |                                    |                                                                                                                                                                                                                                                                |                                                                                                                                                                                                                                                                                                                                                                                                                                                                                                                                                                                                                          |                                                                                                                                                                                                  |                                                                                                                                                                                                               |                                                                                                                                                                                                                                                                                                                                                                                                                                                                                                                                                                                                                                                                                                                                                                                                                                                           |                                                                                                                                                                                                                                                                                                                                                                                                                                                                                                                                                                                                                                                                                                                                                                                                                                                                                                                                                                                                                                                     |  |                 |                |                  |           |           |                |      |  |           |          |
| 46               |                                 |                                                  |                                    |                                                                                                                                                                                                                                                                |                                                                                                                                                                                                                                                                                                                                                                                                                                                                                                                                                                                                                          |                                                                                                                                                                                                  |                                                                                                                                                                                                               |                                                                                                                                                                                                                                                                                                                                                                                                                                                                                                                                                                                                                                                                                                                                                                                                                                                           |                                                                                                                                                                                                                                                                                                                                                                                                                                                                                                                                                                                                                                                                                                                                                                                                                                                                                                                                                                                                                                                     |  |                 |                |                  |           |           |                |      |  |           |          |

|                                                                                                                                                          |                                          |                                                                   |                              |                                                                                                                                                                                      |                                                                                                                                                                                                                                                                                                                                                                                                                                                                                                                                               |                                                                                                            |                                                                                                                                                                                                                      | Although improvement in all other categories was documented, it did not reach statistical significance.                                                                                                                                                                                                                                                                                                                                                                                                  |                                                                                                                                                                                                                                                                                                                                                                                               |    |        |         |                |      |      |    |   |
|----------------------------------------------------------------------------------------------------------------------------------------------------------|------------------------------------------|-------------------------------------------------------------------|------------------------------|--------------------------------------------------------------------------------------------------------------------------------------------------------------------------------------|-----------------------------------------------------------------------------------------------------------------------------------------------------------------------------------------------------------------------------------------------------------------------------------------------------------------------------------------------------------------------------------------------------------------------------------------------------------------------------------------------------------------------------------------------|------------------------------------------------------------------------------------------------------------|----------------------------------------------------------------------------------------------------------------------------------------------------------------------------------------------------------------------|----------------------------------------------------------------------------------------------------------------------------------------------------------------------------------------------------------------------------------------------------------------------------------------------------------------------------------------------------------------------------------------------------------------------------------------------------------------------------------------------------------|-----------------------------------------------------------------------------------------------------------------------------------------------------------------------------------------------------------------------------------------------------------------------------------------------------------------------------------------------------------------------------------------------|----|--------|---------|----------------|------|------|----|---|
| 1<br>2<br>3<br>4<br>5<br>6<br>7<br>8<br>9<br>10<br>11<br>12<br>13<br>14<br>15<br>16<br>17<br>18<br>19<br>20                                              | 6.Kazemia<br>n et al.<br>(2016),<br>Iran | Mothers<br>/220<br>newborns<br>(assumed<br>220<br>mothers)        | >37<br>/ level not<br>stated | Non-<br>randomised,<br>Convenience<br>sampling.<br><br><i>Group level<br/>effect:</i><br>Intervention/<br>control groups<br><br>Post-<br>intervention<br>testing only                | <b>Intervention: Rooming-<br/>in care.</b><br><br>Mothers and babies were<br>admitted to a different<br>atmosphere to the<br>routine care. This<br>facilitated the mothers<br>and neonates with<br>separate beds along with<br>phototherapy devices<br>and nursing clinical<br>supervision.<br><br><b>Control:</b> The routine care<br>practiced in this neonatal<br>unit supported partial<br>stay of mothers beside<br>their neonates, while<br>sitting on chairs;<br>however, most of the<br>time the mother-infant<br>dyad was separated. | <b>Maternal<br/>satisfaction with<br/>the neonatal<br/>care services<br/>and hospital<br/>stay comfort</b> | During babies'<br>admission (once)<br><br>-Not stated exactly<br>when<br><br>No pre-intervention<br>parent satisfaction<br>data available for<br>comparison.                                                         | <i>Satisfaction questionnaire</i><br><br><b>Validation:</b> No content<br>validity or reliability<br>testing reported.<br><br>The authors state, "a validated<br><i>self-made questionnaire was<br/>employed, which was filled in by<br/>some trained midwives.</i> " No<br>further information on<br>validation processes, number<br>of questions or name of the<br>questionnaire was provided.<br><br>Likert (5 very satisfied-1<br>dissatisfied).                                                     | <b>The level of satisfaction<br/>was significantly higher in<br/>the intervention group,<br/>compared to that in the<br/>control group.</b><br><br><table border="1"> <thead> <tr> <th></th> <th>Interv</th> <th>Control</th> </tr> </thead> <tbody> <tr> <td>Satisfaction %</td> <td>26.6</td> <td>18.8</td> </tr> </tbody> </table><br>p-value 0.027                                        |    | Interv | Control | Satisfaction % | 26.6 | 18.8 | No | 1 |
|                                                                                                                                                          | Interv                                   | Control                                                           |                              |                                                                                                                                                                                      |                                                                                                                                                                                                                                                                                                                                                                                                                                                                                                                                               |                                                                                                            |                                                                                                                                                                                                                      |                                                                                                                                                                                                                                                                                                                                                                                                                                                                                                          |                                                                                                                                                                                                                                                                                                                                                                                               |    |        |         |                |      |      |    |   |
| Satisfaction %                                                                                                                                           | 26.6                                     | 18.8                                                              |                              |                                                                                                                                                                                      |                                                                                                                                                                                                                                                                                                                                                                                                                                                                                                                                               |                                                                                                            |                                                                                                                                                                                                                      |                                                                                                                                                                                                                                                                                                                                                                                                                                                                                                          |                                                                                                                                                                                                                                                                                                                                                                                               |    |        |         |                |      |      |    |   |
| 21<br>22<br>23<br>24<br>25<br>26<br>27<br>28<br>29<br>30<br>31<br>32<br>33<br>34<br>35<br>36<br>37<br>38<br>39<br>40<br>41<br>42<br>43<br>44<br>45<br>46 | 7. Petteys<br>et al.<br>(2015),<br>USA   | Not<br>stated/ 10<br>parents<br>included in<br>sample<br>analysis | 24-36+ /<br>level III        | A prospective<br>cohort design.<br><br>A feasibility<br>study.<br><br><i>Group level<br/>effect:</i><br>Intervention/<br>control groups<br><br>Post-<br>intervention<br>testing only | <b>Intervention: PC<br/>(Palliative care).</b><br><br>PC nurses provided<br>important continuity of<br>care for NICU infants<br>clinically requiring PC<br>and at least weekly<br>verbal support of<br>parents. The PC service<br>also coordinated family<br>conferences, provided or<br>requested orders to<br>improve infant symptom<br>management and<br>comfort, and addressed<br>parental coping and self-<br>care.<br><br><b>Control:</b> Usual clinical<br>care for infants not<br>requiring PC.                                       | <b>Overall<br/>satisfaction with<br/>care received</b>                                                     | During babies'<br>admission (once)<br><br>- At discharge (or<br>study closure for<br>infants who<br>remained<br>hospitalised)<br><br>No pre-intervention<br>parent satisfaction<br>data available for<br>comparison. | <i>Satisfaction questionnaire</i><br><br>A researcher-created<br>questionnaire based on<br>extensive current literature<br>review.<br><br><b>Validation:</b> Partially<br>reported. Authors stated<br>content validity testing<br>took place; no information<br>on reliability testing<br>provided.<br><br>1 question<br><br>Likert (1 extremely<br>dissatisfied-4 to extremely<br>satisfied).<br><br>Optional free text (description<br>of specific experiences<br>impacting satisfaction with<br>care) | <b>Parent satisfaction<br/>response numbers were<br/>small (n= 10), thus<br/>statistical comparison of<br/>parental satisfaction<br/>between cohorts was not<br/>possible.</b><br><br>However, 100% of responding<br>PC parents (n= 2) reported<br>being "extremely satisfied" with<br>care, whereas only 50% of<br>responding usual care parents<br>(n= 4) reported extreme<br>satisfaction. | No | 3      |         |                |      |      |    |   |

|                                                                                                       |                                       |                 |                                    |                                                                                                                                         |                                                                                                                                                                                                                                                                                                                                                                                              |                                                                                    |                                                                                                                                                                                                           |                                                                                                                                                                                                                                                                                                                                                      |                                                                                                                                                                                                                                                                                                                                                                                                                                                                                                                                                                                                                          |                                                                                                                                                                                                             |          |
|-------------------------------------------------------------------------------------------------------|---------------------------------------|-----------------|------------------------------------|-----------------------------------------------------------------------------------------------------------------------------------------|----------------------------------------------------------------------------------------------------------------------------------------------------------------------------------------------------------------------------------------------------------------------------------------------------------------------------------------------------------------------------------------------|------------------------------------------------------------------------------------|-----------------------------------------------------------------------------------------------------------------------------------------------------------------------------------------------------------|------------------------------------------------------------------------------------------------------------------------------------------------------------------------------------------------------------------------------------------------------------------------------------------------------------------------------------------------------|--------------------------------------------------------------------------------------------------------------------------------------------------------------------------------------------------------------------------------------------------------------------------------------------------------------------------------------------------------------------------------------------------------------------------------------------------------------------------------------------------------------------------------------------------------------------------------------------------------------------------|-------------------------------------------------------------------------------------------------------------------------------------------------------------------------------------------------------------|----------|
| 1<br>2<br>3<br>4<br>5<br>6<br>7<br>8<br>9<br>10<br>11<br>12<br>13<br>14<br>15<br>16<br>17<br>18<br>19 | 8. Van de Vijver and Evans (2015), UK | Not stated /105 | Not stated / not stated            | Non-randomised, Convenience sampling.<br><br><i>Unit level effect:</i><br>Three different time periods                                  | <b>Intervention: Baby diary.</b><br><br>Each parent received a communication diary on their infant's admission to the unit. Staff wrote-in infant status updates and kept an infant interaction log with parents. Parents wrote in memories and questions for staff to address during face-to-face communication.<br><br><b>Control:</b> Routine care, before implementation of the diaries. | <b>Satisfaction with communication from neonatal staff</b>                         | During babies' admission (three times)<br><br>- On the day of babies' discharge at study baseline<br><br>- On the day of babies' discharge at 1 month<br><br>On the day of babies' discharge at 15 months | <i>Satisfaction questionnaire</i><br><br>The study team designed a questionnaire, based on the Department of Health and the National Institute for Health and Care Excellence (NICE) quality standards for specialist neonatal care.<br><br><b>Validation:</b> No content validity or reliability testing reported.<br><br>5 questions ("yes or no") | <b>Small numbers. No data indicating statistical analysis conducted or evidence of statistically significant results.</b><br><br><i>"I was receiving regular communication from staff"</i><br>94% - 1 month post diary cohort<br>93% - 15 months post diary cohort<br>77% - pre diary cohort<br><br><i>"My questions and concerns were being addressed"</i><br>100% - 1 month post diary cohort<br>93% - 15 months post diary cohort<br>91% - pre diary cohort<br><br><i>"I feel more involved in my baby's care"</i><br>92% - 1 month post diary cohort<br>100% - 15 months post diary cohort<br>88% - pre diary cohort | <b>Yes.</b><br><br>The intervention concept was created by the project leaders following analysis of baseline survey results and used after multi-disciplinary input and discussion with staff and parents. | <b>3</b> |
| 20<br>21<br>22<br>23<br>24<br>25<br>26<br>27<br>28<br>29<br>30<br>31<br>32                            | 9. Voos and Park. (2014), USA         | Not stated / 62 | Not stated / level III             | Non-randomised, Convenience sampling.<br><br><i>Unit level effect:</i> Two different time periods                                       | <b>Intervention: OU (Open Unit) policy.</b><br><br>Parents were allowed access to their baby 24 hours a day, 7 days a week.<br><br><b>Control:</b> Parents pre-OU implementation received routine care. The unit was closed to parents during nurse change of shift in mornings and evenings.                                                                                                | <b>Parent satisfaction with how much time parents get to spend with their baby</b> | After babies were discharged (once)<br><br>- After pre-OU parents were discharged<br><br>- After post-OU parents were discharged                                                                          | <i>Single question (From a validated questionnaire)</i><br><br>The question "Did you get to spend as much time as you wanted with your baby?" was used from the NRC (National Research Corporation) Picker parent survey.<br><br>1 question ("yes or no")                                                                                            | <b>Small numbers. No data indicating statistical analysis conducted or evidence of statistically significant results.</b><br><br><i>"Did you get to spend as much time as you wanted with your baby?" Yes.</i><br><br>Pre OU 78% (18/23)<br>Post OU 92% (36/39)                                                                                                                                                                                                                                                                                                                                                          | <b>Yes.</b><br><br>The NICU has a Family-centered care committee including parents, which conducted this project.                                                                                           | <b>3</b> |
| 33<br>34<br>35<br>36<br>37<br>38<br>39<br>40<br>41<br>42<br>43<br>44<br>45<br>46                      | 10. Segre et al. (2013), USA          | Mothers /23     | Mean (SD) 31.57 (5.30) / level III | For the outcome of parent satisfaction:<br><br>Non-Randomised, Convenience sampling.<br><br><i>Group level effect:</i><br>Intervention/ | <b>Intervention: (LV) Listening visits.</b><br><br>Mothers met with the LV provider for up to six 50-min LV sessions, conducted in a private hospital, every 2-3 days, within 1-month. Visits entailed greeting, debriefing, updating on current issues, working an agenda through listening and problem solving, and providing closure through                                              | <b>Satisfaction with the treatment and the outcome.</b>                            | During babies' admission (once)<br><br>- Not stated exactly when<br><br>No pre-intervention parent satisfaction data available for comparison.                                                            | <i>Satisfaction questionnaire</i><br><br>The Client Satisfaction Questionnaire was used.<br><br><b>Validation:</b> Partially reported. Authors stated reliability testing took place; no information on content validity provided.<br><br>8 questions.<br><br><b>Format of questions:</b> not stated                                                 | <b>Only the intervention group was assessed and only post-intervention.</b><br><br>The authors reported:<br><br><i>"The majority of women who received LVs were highly satisfied with the intervention".</i><br><br><i>"The average score for the Client Satisfaction Questionnaire was 29.91, comparable to levels of satisfaction reported by clients receiving depression treatment from a mental health professional."</i>                                                                                                                                                                                           | <b>No</b>                                                                                                                                                                                                   | <b>4</b> |



|                                                                                                                   |                                     |                                               |                                                                                                 |                                                                                                      |                                                                                                                                                                                                                                                                                                                                                                                                                                                                                                                      |                                                                                |                                                                                             |                                                                                                                                                                                                                                                                                                                                                           |                                                                                                                                                                                                                                                                                                                                                                                                                                                                                    |                                                                                                                                                            |          |
|-------------------------------------------------------------------------------------------------------------------|-------------------------------------|-----------------------------------------------|-------------------------------------------------------------------------------------------------|------------------------------------------------------------------------------------------------------|----------------------------------------------------------------------------------------------------------------------------------------------------------------------------------------------------------------------------------------------------------------------------------------------------------------------------------------------------------------------------------------------------------------------------------------------------------------------------------------------------------------------|--------------------------------------------------------------------------------|---------------------------------------------------------------------------------------------|-----------------------------------------------------------------------------------------------------------------------------------------------------------------------------------------------------------------------------------------------------------------------------------------------------------------------------------------------------------|------------------------------------------------------------------------------------------------------------------------------------------------------------------------------------------------------------------------------------------------------------------------------------------------------------------------------------------------------------------------------------------------------------------------------------------------------------------------------------|------------------------------------------------------------------------------------------------------------------------------------------------------------|----------|
|                                                                                                                   |                                     |                                               |                                                                                                 | around the incubator for breastfeeding and kangaroo care.                                            |                                                                                                                                                                                                                                                                                                                                                                                                                                                                                                                      |                                                                                | good).                                                                                      |                                                                                                                                                                                                                                                                                                                                                           |                                                                                                                                                                                                                                                                                                                                                                                                                                                                                    |                                                                                                                                                            |          |
| 1<br>2<br>3<br>4<br>5<br>6<br>7<br>8<br>9<br>10<br>11<br>12<br>13<br>14<br>15<br>16<br>17<br>18<br>19<br>20<br>21 | 13. Voos et al. (2011), USA         | Not stated /28                                | Not stated / level not stated                                                                   | Non-randomised, Convenience sampling.<br><br><i>Unit level effect:</i><br>Two different time periods | <b>Intervention: Family-centered rounds (FCRs).</b><br><br>Parents were invited to attend rounds and choose their level of involvement (attend every day/not at all/periodically). For confidentiality concerns, parents were asked to step outside while rounds of others' infants took place. The staff augmented FCRs by meeting with parents again after rounds if needed.<br><br><b>Control:</b> Parents received routine care. Prior to FCR implementation parents were asked to leave the unit during rounds. | <b>Global satisfaction with the NICU experience</b>                            | During babies' admission (twice)<br><br>- Prior to FCR<br><br>- 6 months after starting FCR | <i>Satisfaction questionnaire (Validated)</i><br><br><i>The NIPS questionnaire.</i><br><br>24 questions: looking at satisfaction in different areas of the NICU (medical caregivers, communication, tests, and procedures).<br><br>Likert scale (1-7 points).                                                                                             | <b>A subset of NIPS items related to communication (i.e. being kept informed as to changes in the infant's condition, meeting with physicians, and information about long-term expectations) yielded a significant increase from pre to post FCR scores.</b><br><br><b>post-FCR pre-FCR p-value</b><br>NIPS 5.5 4.4 <0.01<br><b>score</b><br><br>The average score on the NIPS did not change significantly.                                                                       | <b>No</b>                                                                                                                                                  | <b>1</b> |
| 22<br>23<br>24<br>25<br>26<br>27<br>28<br>29<br>30<br>31<br>32<br>33<br>34<br>35<br>36<br>37<br>38<br>39<br>40    | 14. Weiss et al. (2010), USA        | Mothers /84                                   | Mean (SD)<br><br>Pre-interv group: 32 (4.4)<br><br>Post-interv group: 32 (9)<br><br>/ level III | Non-randomised, Convenience sampling<br><br><i>Unit level effect:</i><br>Two different time periods  | <b>Intervention:</b><br><b>An intervention to increase PMP (Principal Medical Providers) availability and communication frequency.</b><br><br>(1) A brief education module for PMPs was introduced (2) parents received a contact card with PMP names, job descriptions and contact information (3) a poster of the faces, names and titles of the PMPs was placed at NICU entrance.<br><br><b>Control:</b> Parents received routine care in the pre-intervention cohort, without the above.                         | <b>Parent satisfaction with physician and nurse practitioner communication</b> | During babies' admission (twice)<br><br>- Pre-intervention<br><br>- Post-intervention       | <i>Satisfaction Questionnaire (Validated)</i><br><br>A pilot survey written by Press Ganey and the Picker Institute was used and revised based on parent responses.<br><br>6 open-ended questions (Quantity of communication)<br><br>6 Likert scale questions (range questions (Availability, understanding, reciprocity, empathy, overall satisfaction)) | <b>Overall satisfaction, based on the ordinal analysis of the five-point Likert scale, was significantly higher after the intervention (P&lt;0.01).</b><br><br><b>Overall satisfaction, dichotomised into a satisfied subgroup and a dissatisfied subgroup for each cohort, was also significantly increased after the intervention.</b><br><br><b>post -interv pre-interv</b><br>Very 97%(32/33)74%(37/50)<br><b>satisfied/ Somewhat satisfied</b><br><br><b>p-value &lt;0.01</b> | <b>No</b><br><br>Authors stated that only after trialing the intervention on many parents (both satisfied and unsatisfied) gave suggestions to improve it. | <b>1</b> |
| 41<br>42<br>43<br>44<br>45<br>46                                                                                  | 15. Foster et al. (2008), Australia | Mothers and fathers /93<br><br>5 Special Care | Mean (SD)<br><br>Headbox: 36.5 (2.6)                                                            | Non-randomised, Convenience sampling<br><br><i>Group level</i>                                       | <b>Intervention 1: Infants received headbox oxygen treatment for respiratory distress.</b><br><br><b>Intervention 2: Infants</b>                                                                                                                                                                                                                                                                                                                                                                                     | <b>Satisfaction with treatment (i.e. headbox oxygen or CPAP)</b>               | During babies' admission (once)<br><br>- Within 5 days of the admission                     | <i>Single question</i><br><br><b>Validation:</b> No content validity or reliability testing reported.                                                                                                                                                                                                                                                     | <b>Parents with babies receiving CPAP rated their satisfaction with the baby's treatment statistically significantly higher than the headbox</b>                                                                                                                                                                                                                                                                                                                                   | <b>No</b>                                                                                                                                                  | <b>1</b> |

|                                                                                                                                              |                              |                                                                                                                                                      |                                                                                                                                                                                             |                                                                                                                                                                                                                                                                                                                                                                                                                                                                                                                                                                                  |                                                                                                                                                                                                                                                                                                          |                                                                                                                                                    |                                                                                                                                                                                                                                                                                                                                                  |                                                                                                                                                                                                                                                                                                                                                                                                                                                                                                                                                                                                                                                                                                                    |    |   |
|----------------------------------------------------------------------------------------------------------------------------------------------|------------------------------|------------------------------------------------------------------------------------------------------------------------------------------------------|---------------------------------------------------------------------------------------------------------------------------------------------------------------------------------------------|----------------------------------------------------------------------------------------------------------------------------------------------------------------------------------------------------------------------------------------------------------------------------------------------------------------------------------------------------------------------------------------------------------------------------------------------------------------------------------------------------------------------------------------------------------------------------------|----------------------------------------------------------------------------------------------------------------------------------------------------------------------------------------------------------------------------------------------------------------------------------------------------------|----------------------------------------------------------------------------------------------------------------------------------------------------|--------------------------------------------------------------------------------------------------------------------------------------------------------------------------------------------------------------------------------------------------------------------------------------------------------------------------------------------------|--------------------------------------------------------------------------------------------------------------------------------------------------------------------------------------------------------------------------------------------------------------------------------------------------------------------------------------------------------------------------------------------------------------------------------------------------------------------------------------------------------------------------------------------------------------------------------------------------------------------------------------------------------------------------------------------------------------------|----|---|
| 1<br>2<br>3<br>4<br>5<br>6<br>7                                                                                                              | Nurseries                    | CPAP:<br>36 (3)<br><br>/level I                                                                                                                      | <i>effect:</i><br>Intervention<br>1/ intervention<br>2 groups<br><br>Post<br>intervention<br>testing only                                                                                   | <b>received continuous oxygen positive airway pressure (CPAP) treatment for respiratory distress.</b>                                                                                                                                                                                                                                                                                                                                                                                                                                                                            |                                                                                                                                                                                                                                                                                                          | No pre-intervention parent satisfaction data available for comparison.                                                                             | 1 likert scale question (1 not at all satisfied-5 extremely satisfied).                                                                                                                                                                                                                                                                          | <b>group mean rating.</b><br><b>Headbox CPAP</b><br><b>Mean</b> 3.71 (1.31) 4.51 (0.79)<br><b>(SD)</b><br><b>p-value</b> 0.001<br><br>The CPAP group averaged between <i>very and extremely satisfied</i> compared with parents of babies receiving headbox, who averaged between <i>satisfied and very satisfied</i> ratings.                                                                                                                                                                                                                                                                                                                                                                                     |    |   |
| 8<br>9<br>10<br>11<br>12<br>13<br>14<br>15<br>16<br>17<br>18<br>19<br>20<br>21<br>22                                                         | 16. Byers et al. (2006), USA | Only mothers reported /35<br><br>Preterm infants<br><br>Mean (SD)<br><br>Control:<br>28.9 (3.44)<br><br>Interv:<br>28.6 (3.37)<br><br>/ level II/III | For the outcome of parent satisfaction:<br><br>Non-randomised, Convenience sampling<br><br><i>Group level effect:</i><br>Intervention/ control groups<br><br>Post-intervention testing only | <b>Intervention: Infants received individualised, developmentally supportive family-centered care.</b><br><br>Infants received care within the framework and philosophy of individualised, developmentally supportive family-centered interventions.<br><br><b>Control:</b> Infants received the traditional NICU standard of care.                                                                                                                                                                                                                                              | <b>Parent satisfaction relating to:</b><br>- parental perceptions of staff caring<br>- education received<br>- preparation for the parental role<br>- overall satisfaction with the NICU experience                                                                                                      | During babies' admission (once)<br><br>- On the day before discharge<br><br>No pre-intervention parent satisfaction data available for comparison. | <i>Satisfaction questionnaire</i><br><br>The NICU's parental satisfaction tool was used.<br><br><b>Validation:</b> Partially reported. Authors stated content validity testing took place, but "because of the disparate nature of the items, survey reliability was not assessed".<br><br>11 questions<br><br>Likert scale (1-5 strongly agree) | <b>Independent t-test analysis of parent satisfaction/perception scores showed no significant difference between groups.</b><br><br>Example statement: "I was satisfied with the car my baby and I received in the NICU"<br><br><b>Interv Control</b><br><b>Mean</b> 4.94(0.23) 4.71(0.47)<br><b>(SD)</b><br><b>p-value</b> 0.064<br><br>Both groups reported very high satisfaction with their NICU experience (4.4-5.0)                                                                                                                                                                                                                                                                                          | No | 2 |
| 23<br>24<br>25<br>26<br>27<br>28<br>29<br>30<br>31<br>32<br>33<br>34<br>35<br>36<br>37<br>38<br>39<br>40<br>41<br>42<br>43<br>44<br>45<br>46 | 17. Mills et al. (2006), USA | Not stated/ not stated<br><br>Not stated / level not stated<br><br>Parents of infants from 6 hospitals                                               | Implementatio n project<br><br>Plan Do Study Act (PDSA) quality improvement testing                                                                                                         | <b>Intervention: 5 potentially better practices (PBPs) in the area of discharge planning.</b><br><br>The project team iteratively implemented 5 PBPs:<br>1. Created an easy-to-use, easy-to-access discharge planning tool kit.<br>2. Restructured communication tools and processes to reflect a "plan for the day, the stay, and the way" to discharge.<br>3. Maximised the impact and use of caregiver educational tools, and updated materials and delivery systems for caregiver education.<br>4. Used various continuous quality improvement tools and processes to ensure | <b>General satisfaction</b><br>- with care<br>- parents' feelings about preparedness for discharge<br>- ability and confidence in feeding<br>- familiarity with their infant<br>- feeling like a parent<br>- participation in care<br>- adequacy of information from staff about medical and care issues | During babies' admission (4 times)<br><br>- Not reported exactly when                                                                              | <i>Satisfaction questionnaire</i><br><br>The Internet-based parent satisfaction survey "howsyourbaby.com" that was developed especially for this NICU population was used.<br><br><b>Validation:</b> No content validity or reliability testing reported.<br><br><b>Number and format of questions:</b> not stated.                              | Through multiple rapid-cycle projects, the project's collaborative group made changes within the 5 PBP plans.<br><br><b>Parent satisfaction measures were used to longitudinally monitor the changes made, rather than make direct group comparison. No data indicating statistical analysis conducted or evidence of statistically significant results.</b><br><br>Parent satisfaction survey results (all centers combined) were high across 4 measurement quartiles. No specific interquartile analysis was reported.<br><br>Parent readiness for discharge was high at the beginning and throughout the collaborative. Parents' receiving "just the right amount of information" regarding car seat trials and | No | 3 |



|    |                              |             |                                                                                      |                                                                                                                                                                                      |                                                                                                                                                                                                                                                                                                                                                 |                                                                                                                                                                                                                                                                                                       |                                                                                                                                                                                                                                                                                                                                                                                                                                                                                                                                                                                                                                                                                                                          |                                                                                                                                                                                                                                                                                                                                          |                                                                                                                                                                                                                                                                                                                                                                                                                                                                                  |    |   |  |
|----|------------------------------|-------------|--------------------------------------------------------------------------------------|--------------------------------------------------------------------------------------------------------------------------------------------------------------------------------------|-------------------------------------------------------------------------------------------------------------------------------------------------------------------------------------------------------------------------------------------------------------------------------------------------------------------------------------------------|-------------------------------------------------------------------------------------------------------------------------------------------------------------------------------------------------------------------------------------------------------------------------------------------------------|--------------------------------------------------------------------------------------------------------------------------------------------------------------------------------------------------------------------------------------------------------------------------------------------------------------------------------------------------------------------------------------------------------------------------------------------------------------------------------------------------------------------------------------------------------------------------------------------------------------------------------------------------------------------------------------------------------------------------|------------------------------------------------------------------------------------------------------------------------------------------------------------------------------------------------------------------------------------------------------------------------------------------------------------------------------------------|----------------------------------------------------------------------------------------------------------------------------------------------------------------------------------------------------------------------------------------------------------------------------------------------------------------------------------------------------------------------------------------------------------------------------------------------------------------------------------|----|---|--|
| 1  |                              |             | from the intervention group)                                                         | Control: During the control phase, professionals carried out usual communication and interaction with control group parents.                                                         | making (5) Decisions made                                                                                                                                                                                                                                                                                                                       |                                                                                                                                                                                                                                                                                                       | 30 questions.<br>Five-point Likert scale.<br><br>2. A subscale of the investigator-designed "Relationships with Professional and Decision Input Questionnaire" was used to measure Satisfaction with relationships (2).<br><br>Validation: Partially reported. Authors stated content validity testing took place; no information on reliability testing provided.<br>12 questions.<br><br>Five-point Likert scale<br><br>3. Validated. The "Collaboration and Satisfaction About Care Questionnaire" developed by Baggs, was used to measure Satisfaction with decision input (3), with decision process (4) and with decisions made (5).<br><br>9 questions.<br>7-point scale, (1 strongly disagree -7 strongly agree) | NICU professionals (2) and with the decisions made for infant treatment (5).                                                                                                                                                                                                                                                             |                                                                                                                                                                                                                                                                                                                                                                                                                                                                                  |    |   |  |
| 2  |                              |             | Unit level effect: Two different time periods                                        |                                                                                                                                                                                      |                                                                                                                                                                                                                                                                                                                                                 |                                                                                                                                                                                                                                                                                                       |                                                                                                                                                                                                                                                                                                                                                                                                                                                                                                                                                                                                                                                                                                                          |                                                                                                                                                                                                                                                                                                                                          |                                                                                                                                                                                                                                                                                                                                                                                                                                                                                  |    |   |  |
| 3  |                              |             |                                                                                      |                                                                                                                                                                                      |                                                                                                                                                                                                                                                                                                                                                 |                                                                                                                                                                                                                                                                                                       |                                                                                                                                                                                                                                                                                                                                                                                                                                                                                                                                                                                                                                                                                                                          |                                                                                                                                                                                                                                                                                                                                          |                                                                                                                                                                                                                                                                                                                                                                                                                                                                                  |    |   |  |
| 4  |                              |             |                                                                                      |                                                                                                                                                                                      |                                                                                                                                                                                                                                                                                                                                                 |                                                                                                                                                                                                                                                                                                       |                                                                                                                                                                                                                                                                                                                                                                                                                                                                                                                                                                                                                                                                                                                          |                                                                                                                                                                                                                                                                                                                                          |                                                                                                                                                                                                                                                                                                                                                                                                                                                                                  |    |   |  |
| 5  |                              |             |                                                                                      |                                                                                                                                                                                      |                                                                                                                                                                                                                                                                                                                                                 |                                                                                                                                                                                                                                                                                                       |                                                                                                                                                                                                                                                                                                                                                                                                                                                                                                                                                                                                                                                                                                                          |                                                                                                                                                                                                                                                                                                                                          |                                                                                                                                                                                                                                                                                                                                                                                                                                                                                  |    |   |  |
| 6  |                              |             |                                                                                      |                                                                                                                                                                                      |                                                                                                                                                                                                                                                                                                                                                 |                                                                                                                                                                                                                                                                                                       |                                                                                                                                                                                                                                                                                                                                                                                                                                                                                                                                                                                                                                                                                                                          |                                                                                                                                                                                                                                                                                                                                          |                                                                                                                                                                                                                                                                                                                                                                                                                                                                                  |    |   |  |
| 7  |                              |             |                                                                                      |                                                                                                                                                                                      |                                                                                                                                                                                                                                                                                                                                                 |                                                                                                                                                                                                                                                                                                       |                                                                                                                                                                                                                                                                                                                                                                                                                                                                                                                                                                                                                                                                                                                          |                                                                                                                                                                                                                                                                                                                                          |                                                                                                                                                                                                                                                                                                                                                                                                                                                                                  |    |   |  |
| 8  |                              |             |                                                                                      |                                                                                                                                                                                      |                                                                                                                                                                                                                                                                                                                                                 |                                                                                                                                                                                                                                                                                                       |                                                                                                                                                                                                                                                                                                                                                                                                                                                                                                                                                                                                                                                                                                                          |                                                                                                                                                                                                                                                                                                                                          |                                                                                                                                                                                                                                                                                                                                                                                                                                                                                  |    |   |  |
| 9  |                              |             |                                                                                      |                                                                                                                                                                                      |                                                                                                                                                                                                                                                                                                                                                 |                                                                                                                                                                                                                                                                                                       |                                                                                                                                                                                                                                                                                                                                                                                                                                                                                                                                                                                                                                                                                                                          |                                                                                                                                                                                                                                                                                                                                          |                                                                                                                                                                                                                                                                                                                                                                                                                                                                                  |    |   |  |
| 10 |                              |             |                                                                                      |                                                                                                                                                                                      |                                                                                                                                                                                                                                                                                                                                                 |                                                                                                                                                                                                                                                                                                       |                                                                                                                                                                                                                                                                                                                                                                                                                                                                                                                                                                                                                                                                                                                          |                                                                                                                                                                                                                                                                                                                                          |                                                                                                                                                                                                                                                                                                                                                                                                                                                                                  |    |   |  |
| 11 |                              |             |                                                                                      |                                                                                                                                                                                      |                                                                                                                                                                                                                                                                                                                                                 |                                                                                                                                                                                                                                                                                                       |                                                                                                                                                                                                                                                                                                                                                                                                                                                                                                                                                                                                                                                                                                                          |                                                                                                                                                                                                                                                                                                                                          |                                                                                                                                                                                                                                                                                                                                                                                                                                                                                  |    |   |  |
| 12 |                              |             |                                                                                      |                                                                                                                                                                                      |                                                                                                                                                                                                                                                                                                                                                 |                                                                                                                                                                                                                                                                                                       |                                                                                                                                                                                                                                                                                                                                                                                                                                                                                                                                                                                                                                                                                                                          |                                                                                                                                                                                                                                                                                                                                          |                                                                                                                                                                                                                                                                                                                                                                                                                                                                                  |    |   |  |
| 13 |                              |             |                                                                                      |                                                                                                                                                                                      |                                                                                                                                                                                                                                                                                                                                                 |                                                                                                                                                                                                                                                                                                       |                                                                                                                                                                                                                                                                                                                                                                                                                                                                                                                                                                                                                                                                                                                          |                                                                                                                                                                                                                                                                                                                                          |                                                                                                                                                                                                                                                                                                                                                                                                                                                                                  |    |   |  |
| 14 |                              |             |                                                                                      |                                                                                                                                                                                      |                                                                                                                                                                                                                                                                                                                                                 |                                                                                                                                                                                                                                                                                                       |                                                                                                                                                                                                                                                                                                                                                                                                                                                                                                                                                                                                                                                                                                                          |                                                                                                                                                                                                                                                                                                                                          |                                                                                                                                                                                                                                                                                                                                                                                                                                                                                  |    |   |  |
| 15 |                              |             |                                                                                      |                                                                                                                                                                                      |                                                                                                                                                                                                                                                                                                                                                 |                                                                                                                                                                                                                                                                                                       |                                                                                                                                                                                                                                                                                                                                                                                                                                                                                                                                                                                                                                                                                                                          |                                                                                                                                                                                                                                                                                                                                          |                                                                                                                                                                                                                                                                                                                                                                                                                                                                                  |    |   |  |
| 16 |                              |             |                                                                                      |                                                                                                                                                                                      |                                                                                                                                                                                                                                                                                                                                                 |                                                                                                                                                                                                                                                                                                       |                                                                                                                                                                                                                                                                                                                                                                                                                                                                                                                                                                                                                                                                                                                          |                                                                                                                                                                                                                                                                                                                                          |                                                                                                                                                                                                                                                                                                                                                                                                                                                                                  |    |   |  |
| 17 |                              |             |                                                                                      |                                                                                                                                                                                      |                                                                                                                                                                                                                                                                                                                                                 |                                                                                                                                                                                                                                                                                                       |                                                                                                                                                                                                                                                                                                                                                                                                                                                                                                                                                                                                                                                                                                                          |                                                                                                                                                                                                                                                                                                                                          |                                                                                                                                                                                                                                                                                                                                                                                                                                                                                  |    |   |  |
| 18 |                              |             |                                                                                      |                                                                                                                                                                                      |                                                                                                                                                                                                                                                                                                                                                 |                                                                                                                                                                                                                                                                                                       |                                                                                                                                                                                                                                                                                                                                                                                                                                                                                                                                                                                                                                                                                                                          |                                                                                                                                                                                                                                                                                                                                          |                                                                                                                                                                                                                                                                                                                                                                                                                                                                                  |    |   |  |
| 19 |                              |             |                                                                                      |                                                                                                                                                                                      |                                                                                                                                                                                                                                                                                                                                                 |                                                                                                                                                                                                                                                                                                       |                                                                                                                                                                                                                                                                                                                                                                                                                                                                                                                                                                                                                                                                                                                          |                                                                                                                                                                                                                                                                                                                                          |                                                                                                                                                                                                                                                                                                                                                                                                                                                                                  |    |   |  |
| 20 |                              |             |                                                                                      |                                                                                                                                                                                      |                                                                                                                                                                                                                                                                                                                                                 |                                                                                                                                                                                                                                                                                                       |                                                                                                                                                                                                                                                                                                                                                                                                                                                                                                                                                                                                                                                                                                                          |                                                                                                                                                                                                                                                                                                                                          |                                                                                                                                                                                                                                                                                                                                                                                                                                                                                  |    |   |  |
| 21 |                              |             |                                                                                      |                                                                                                                                                                                      |                                                                                                                                                                                                                                                                                                                                                 |                                                                                                                                                                                                                                                                                                       |                                                                                                                                                                                                                                                                                                                                                                                                                                                                                                                                                                                                                                                                                                                          |                                                                                                                                                                                                                                                                                                                                          |                                                                                                                                                                                                                                                                                                                                                                                                                                                                                  |    |   |  |
| 22 |                              |             |                                                                                      |                                                                                                                                                                                      |                                                                                                                                                                                                                                                                                                                                                 |                                                                                                                                                                                                                                                                                                       |                                                                                                                                                                                                                                                                                                                                                                                                                                                                                                                                                                                                                                                                                                                          |                                                                                                                                                                                                                                                                                                                                          |                                                                                                                                                                                                                                                                                                                                                                                                                                                                                  |    |   |  |
| 23 |                              |             |                                                                                      |                                                                                                                                                                                      |                                                                                                                                                                                                                                                                                                                                                 |                                                                                                                                                                                                                                                                                                       |                                                                                                                                                                                                                                                                                                                                                                                                                                                                                                                                                                                                                                                                                                                          |                                                                                                                                                                                                                                                                                                                                          |                                                                                                                                                                                                                                                                                                                                                                                                                                                                                  |    |   |  |
| 24 |                              |             |                                                                                      |                                                                                                                                                                                      |                                                                                                                                                                                                                                                                                                                                                 |                                                                                                                                                                                                                                                                                                       |                                                                                                                                                                                                                                                                                                                                                                                                                                                                                                                                                                                                                                                                                                                          |                                                                                                                                                                                                                                                                                                                                          |                                                                                                                                                                                                                                                                                                                                                                                                                                                                                  |    |   |  |
| 25 |                              |             |                                                                                      |                                                                                                                                                                                      |                                                                                                                                                                                                                                                                                                                                                 |                                                                                                                                                                                                                                                                                                       |                                                                                                                                                                                                                                                                                                                                                                                                                                                                                                                                                                                                                                                                                                                          |                                                                                                                                                                                                                                                                                                                                          |                                                                                                                                                                                                                                                                                                                                                                                                                                                                                  |    |   |  |
| 26 |                              |             |                                                                                      |                                                                                                                                                                                      |                                                                                                                                                                                                                                                                                                                                                 |                                                                                                                                                                                                                                                                                                       |                                                                                                                                                                                                                                                                                                                                                                                                                                                                                                                                                                                                                                                                                                                          |                                                                                                                                                                                                                                                                                                                                          |                                                                                                                                                                                                                                                                                                                                                                                                                                                                                  |    |   |  |
| 27 |                              |             |                                                                                      |                                                                                                                                                                                      |                                                                                                                                                                                                                                                                                                                                                 |                                                                                                                                                                                                                                                                                                       |                                                                                                                                                                                                                                                                                                                                                                                                                                                                                                                                                                                                                                                                                                                          |                                                                                                                                                                                                                                                                                                                                          |                                                                                                                                                                                                                                                                                                                                                                                                                                                                                  |    |   |  |
| 28 | 20. Byers et al. (2003), USA | Mothers/ 19 | Mean (SD)<br><br>Control: 29 (2.00)<br><br>Interv: 28.9 (2.42)<br><br>/ level II-III | For the outcome of parent satisfaction:<br><br>Non-randomised, Convenience sampling<br><br>Group level effect: Intervention/ control groups<br><br>Pre and post-intervention testing | Intervention: Co-bedding premature multiple-gestation infants in incubators.<br><br>Infants were nursed in the same incubator using a co-bedding protocol (e.g. recording all of the care provided to one infant before providing care to the second infant)<br><br>Control: Single-bedding premature multiple-gestation infants in incubators. | Parent satisfaction related to:<br>- staff concern<br>- support of family<br>- staff explanations<br>- infant environment,<br>- comfort with feeding<br>- kangaroo care encouragement<br>- staff explanation of signs of infant stress<br>- visiting schedule<br>- overall satisfaction with the NICU | During babies' admission (twice)<br><br>- At baseline<br><br>- 5 days later                                                                                                                                                                                                                                                                                                                                                                                                                                                                                                                                                                                                                                              | Satisfaction questionnaire<br><br>The NICU's standard parental satisfaction tool was used.<br><br>Validation: Partially reported. Authors stated content validity testing took place, but because of the disparate nature of the items, survey reliability could not be assessed.<br><br>11 questions.<br><br>5-point Likert-type scale. | <b>The only significant difference for a post-intervention item was a higher score for the item "Attempts were made to create a quiet environment for my baby."</b><br><br>Interv Control p-value<br>Mean 4.80 3.89 0.033<br><br>Independent t-tests comparing the co-bedded and control group parental scores found no significant differences in their parental satisfaction scores, except for higher baseline parental satisfaction scores (p=0.029) in the co-bedded group. | No | 1 |  |
| 29 |                              |             |                                                                                      |                                                                                                                                                                                      |                                                                                                                                                                                                                                                                                                                                                 |                                                                                                                                                                                                                                                                                                       |                                                                                                                                                                                                                                                                                                                                                                                                                                                                                                                                                                                                                                                                                                                          |                                                                                                                                                                                                                                                                                                                                          |                                                                                                                                                                                                                                                                                                                                                                                                                                                                                  |    |   |  |
| 30 |                              |             |                                                                                      |                                                                                                                                                                                      |                                                                                                                                                                                                                                                                                                                                                 |                                                                                                                                                                                                                                                                                                       |                                                                                                                                                                                                                                                                                                                                                                                                                                                                                                                                                                                                                                                                                                                          |                                                                                                                                                                                                                                                                                                                                          |                                                                                                                                                                                                                                                                                                                                                                                                                                                                                  |    |   |  |
| 31 |                              |             |                                                                                      |                                                                                                                                                                                      |                                                                                                                                                                                                                                                                                                                                                 |                                                                                                                                                                                                                                                                                                       |                                                                                                                                                                                                                                                                                                                                                                                                                                                                                                                                                                                                                                                                                                                          |                                                                                                                                                                                                                                                                                                                                          |                                                                                                                                                                                                                                                                                                                                                                                                                                                                                  |    |   |  |
| 32 |                              |             |                                                                                      |                                                                                                                                                                                      |                                                                                                                                                                                                                                                                                                                                                 |                                                                                                                                                                                                                                                                                                       |                                                                                                                                                                                                                                                                                                                                                                                                                                                                                                                                                                                                                                                                                                                          |                                                                                                                                                                                                                                                                                                                                          |                                                                                                                                                                                                                                                                                                                                                                                                                                                                                  |    |   |  |
| 33 |                              |             |                                                                                      |                                                                                                                                                                                      |                                                                                                                                                                                                                                                                                                                                                 |                                                                                                                                                                                                                                                                                                       |                                                                                                                                                                                                                                                                                                                                                                                                                                                                                                                                                                                                                                                                                                                          |                                                                                                                                                                                                                                                                                                                                          |                                                                                                                                                                                                                                                                                                                                                                                                                                                                                  |    |   |  |
| 34 |                              |             |                                                                                      |                                                                                                                                                                                      |                                                                                                                                                                                                                                                                                                                                                 |                                                                                                                                                                                                                                                                                                       |                                                                                                                                                                                                                                                                                                                                                                                                                                                                                                                                                                                                                                                                                                                          |                                                                                                                                                                                                                                                                                                                                          |                                                                                                                                                                                                                                                                                                                                                                                                                                                                                  |    |   |  |
| 35 |                              |             |                                                                                      |                                                                                                                                                                                      |                                                                                                                                                                                                                                                                                                                                                 |                                                                                                                                                                                                                                                                                                       |                                                                                                                                                                                                                                                                                                                                                                                                                                                                                                                                                                                                                                                                                                                          |                                                                                                                                                                                                                                                                                                                                          |                                                                                                                                                                                                                                                                                                                                                                                                                                                                                  |    |   |  |
| 36 |                              |             |                                                                                      |                                                                                                                                                                                      |                                                                                                                                                                                                                                                                                                                                                 |                                                                                                                                                                                                                                                                                                       |                                                                                                                                                                                                                                                                                                                                                                                                                                                                                                                                                                                                                                                                                                                          |                                                                                                                                                                                                                                                                                                                                          |                                                                                                                                                                                                                                                                                                                                                                                                                                                                                  |    |   |  |
| 37 |                              |             |                                                                                      |                                                                                                                                                                                      |                                                                                                                                                                                                                                                                                                                                                 |                                                                                                                                                                                                                                                                                                       |                                                                                                                                                                                                                                                                                                                                                                                                                                                                                                                                                                                                                                                                                                                          |                                                                                                                                                                                                                                                                                                                                          |                                                                                                                                                                                                                                                                                                                                                                                                                                                                                  |    |   |  |
| 38 |                              |             |                                                                                      |                                                                                                                                                                                      |                                                                                                                                                                                                                                                                                                                                                 |                                                                                                                                                                                                                                                                                                       |                                                                                                                                                                                                                                                                                                                                                                                                                                                                                                                                                                                                                                                                                                                          |                                                                                                                                                                                                                                                                                                                                          |                                                                                                                                                                                                                                                                                                                                                                                                                                                                                  |    |   |  |
| 39 |                              |             |                                                                                      |                                                                                                                                                                                      |                                                                                                                                                                                                                                                                                                                                                 |                                                                                                                                                                                                                                                                                                       |                                                                                                                                                                                                                                                                                                                                                                                                                                                                                                                                                                                                                                                                                                                          |                                                                                                                                                                                                                                                                                                                                          |                                                                                                                                                                                                                                                                                                                                                                                                                                                                                  |    |   |  |
| 40 |                              |             |                                                                                      |                                                                                                                                                                                      |                                                                                                                                                                                                                                                                                                                                                 |                                                                                                                                                                                                                                                                                                       |                                                                                                                                                                                                                                                                                                                                                                                                                                                                                                                                                                                                                                                                                                                          |                                                                                                                                                                                                                                                                                                                                          |                                                                                                                                                                                                                                                                                                                                                                                                                                                                                  |    |   |  |
| 41 |                              |             |                                                                                      |                                                                                                                                                                                      |                                                                                                                                                                                                                                                                                                                                                 |                                                                                                                                                                                                                                                                                                       |                                                                                                                                                                                                                                                                                                                                                                                                                                                                                                                                                                                                                                                                                                                          |                                                                                                                                                                                                                                                                                                                                          |                                                                                                                                                                                                                                                                                                                                                                                                                                                                                  |    |   |  |
| 42 |                              |             |                                                                                      |                                                                                                                                                                                      |                                                                                                                                                                                                                                                                                                                                                 |                                                                                                                                                                                                                                                                                                       |                                                                                                                                                                                                                                                                                                                                                                                                                                                                                                                                                                                                                                                                                                                          |                                                                                                                                                                                                                                                                                                                                          |                                                                                                                                                                                                                                                                                                                                                                                                                                                                                  |    |   |  |
| 43 |                              |             |                                                                                      |                                                                                                                                                                                      |                                                                                                                                                                                                                                                                                                                                                 |                                                                                                                                                                                                                                                                                                       |                                                                                                                                                                                                                                                                                                                                                                                                                                                                                                                                                                                                                                                                                                                          |                                                                                                                                                                                                                                                                                                                                          |                                                                                                                                                                                                                                                                                                                                                                                                                                                                                  |    |   |  |
| 44 |                              |             |                                                                                      |                                                                                                                                                                                      |                                                                                                                                                                                                                                                                                                                                                 |                                                                                                                                                                                                                                                                                                       |                                                                                                                                                                                                                                                                                                                                                                                                                                                                                                                                                                                                                                                                                                                          |                                                                                                                                                                                                                                                                                                                                          |                                                                                                                                                                                                                                                                                                                                                                                                                                                                                  |    |   |  |
| 45 |                              |             |                                                                                      |                                                                                                                                                                                      |                                                                                                                                                                                                                                                                                                                                                 |                                                                                                                                                                                                                                                                                                       |                                                                                                                                                                                                                                                                                                                                                                                                                                                                                                                                                                                                                                                                                                                          |                                                                                                                                                                                                                                                                                                                                          |                                                                                                                                                                                                                                                                                                                                                                                                                                                                                  |    |   |  |
| 46 |                              |             |                                                                                      |                                                                                                                                                                                      |                                                                                                                                                                                                                                                                                                                                                 |                                                                                                                                                                                                                                                                                                       |                                                                                                                                                                                                                                                                                                                                                                                                                                                                                                                                                                                                                                                                                                                          |                                                                                                                                                                                                                                                                                                                                          |                                                                                                                                                                                                                                                                                                                                                                                                                                                                                  |    |   |  |



|                                                                                                                                              |                                        |                                  |                                                                                  |                                                                                                                        |                                                                                                                                                                                                                                                                                                                                                                                                                                                                                                                                                                                 |                                                                                                                              |                                                                                                                                                                                                                                     |                                                                                                                                                                                                                                                                                                                                                                                                                                                                                                                                                   |                                                                                                                                                                                                                                                                                                                                                                                                                                                                                                                                                                                  |           |          |
|----------------------------------------------------------------------------------------------------------------------------------------------|----------------------------------------|----------------------------------|----------------------------------------------------------------------------------|------------------------------------------------------------------------------------------------------------------------|---------------------------------------------------------------------------------------------------------------------------------------------------------------------------------------------------------------------------------------------------------------------------------------------------------------------------------------------------------------------------------------------------------------------------------------------------------------------------------------------------------------------------------------------------------------------------------|------------------------------------------------------------------------------------------------------------------------------|-------------------------------------------------------------------------------------------------------------------------------------------------------------------------------------------------------------------------------------|---------------------------------------------------------------------------------------------------------------------------------------------------------------------------------------------------------------------------------------------------------------------------------------------------------------------------------------------------------------------------------------------------------------------------------------------------------------------------------------------------------------------------------------------------|----------------------------------------------------------------------------------------------------------------------------------------------------------------------------------------------------------------------------------------------------------------------------------------------------------------------------------------------------------------------------------------------------------------------------------------------------------------------------------------------------------------------------------------------------------------------------------|-----------|----------|
|                                                                                                                                              |                                        |                                  |                                                                                  |                                                                                                                        | <i>experience</i>                                                                                                                                                                                                                                                                                                                                                                                                                                                                                                                                                               |                                                                                                                              |                                                                                                                                                                                                                                     |                                                                                                                                                                                                                                                                                                                                                                                                                                                                                                                                                   |                                                                                                                                                                                                                                                                                                                                                                                                                                                                                                                                                                                  |           |          |
| 1<br>2<br>3<br>4<br>5<br>6<br>7<br>8<br>9<br>10<br>11<br>12<br>13<br>14<br>15<br>16<br>17<br>18<br>19<br>20<br>21<br>22                      | 21. Polizzi et al. (2003), USA         | Mothers and fathers/ 33          | Mean (SD)<br>Control: 32.97 (1.9)<br><br>Interv: 33.08 (1.31)<br><br>/ level III | A retrospective, comparative, descriptive design.<br><br><i>Unit level effect</i>                                      | <b>Intervention: Co-bedding multiple-gestation infants in the NICU.</b><br><br>Multiple-gestation infants were nursed in the same incubator or crib. The intervention was evaluated retrospectively after implementation of a co-bedding practice protocol.<br><br><b>Control:</b> Traditionally-bedded group (babies were routinely placed in separate incubators or cribs)                                                                                                                                                                                                    | <b>Parental satisfaction as measured by 9 questions relating to parent perceptions and their baby's care</b>                 | After babies were discharged (once)<br><br>- All parents were mailed the survey. A second survey was sent to those who did not respond after 2 months<br><br>No pre-intervention parent satisfaction data available for comparison. | <b>Satisfaction questionnaire</b><br><br>The <i>parental perception/satisfaction tool</i> was used.<br><br><b>Validation:</b> Partially reported. Authors stated content validity testing took place; no information on reliability testing provided. 6/9 questions were from a similar tool that was validated by the Vermont Oxford NICU Quality Improvement Initiative.<br><br>9 questions (such as "I was satisfied with the care my babies received in the hospital").<br><br>Likert (1 strongly disagree- 5 strongly agree)                 | Mothers reported overall satisfaction with the NICU care and staff, as well as adequacy of their ability to care for their infants after discharge, with scores ranging from 4.19 to 4.71.<br><br><b>The only survey item score that was significantly different between groups was for the item "I was encouraged by the hospital staff to bond with my babies."</b><br><br><b>Interv Control p-value</b><br><b>Mean 4.71 4.36 0.049</b>                                                                                                                                        | <b>No</b> | <b>1</b> |
| 23<br>24<br>25<br>26<br>27<br>28<br>29<br>30<br>31<br>32<br>33<br>34<br>35<br>36<br>37<br>38<br>39<br>40<br>41<br>42<br>43<br>44<br>45<br>46 | 22. Legault and Goulet. (1995), Canada | Mothers/ 61 completed both tests | Mean (range)<br>30 (24-35)<br><br>/ level II                                     | Time-series design<br><br><i>Group level effect:</i> Same group exposed to both methods with post-method testing only. | <b>Intervention: Kangaroo method of removing an infant from an incubator.</b><br><br>Mothers were taught the "kangaroo method" (skin-to-skin contact): infant wears a diaper/head cap and is placed in a vertical position on the parent's bared chest. A blanket covers the infant and the parent's clothing is fastened around the infant. The parent sits in a rocking chair, inclined so that the infant's head is at 60'.<br><br><b>Control:</b> Traditional method. Newborns wearing a diaper and a head cap, are wrapped in a blanket and placed in their parent's arms. | <b>Mothers' satisfaction with:</b><br>- Each method of removing an infant from incubator<br>- Her feelings after each method | During babies' admission (twice)<br><br>- After the intervention<br><br>- After the control method<br><br>No pre-intervention parent satisfaction data available for comparison.                                                    | <b>Satisfaction questionnaire</b><br><br>The "Maternal Satisfaction Questionnaire" was used. It was developed by integrating components described by Affonso et al and the clinical experience of the investigators.<br><br><b>Validation:</b> Partially reported. Authors stated content validity testing took place; no information on reliability testing provided.<br><br>15 questions<br><br>Likert (1 very much-5 don't know)<br><br>An open-ended question invited the mother to list and explain anything else related to her experience. | <b>Regardless of the method tested, mothers expressed high levels of satisfaction (it was the first time since giving birth that they could hold their infants).</b><br><br>Three statements proved more powerful in discriminating between the methods:<br><br><b>Rated higher after the kangaroo method test:</b><br>- "I like the contact with my baby's skin" (p=0.0001)<br><br><b>Rated higher after the traditional method test:</b><br>- "I like to talk to and whisper to my baby" (p = 0.015)<br>- "I looked into my baby's eyes and stared at his/her face" (p=0.0001) | <b>No</b> | <b>1</b> |

## Randomised controlled trials (RCT) by publication year

| Author (Date), Country                  | Parent Gender/sample size | Infants Gestation age (GA) in weeks /NICU level | Study design                           | Intervention                                                                                                                                                                                                                                                                                                                             | Outcome measures                                               | Timing of measurement                                                                                                                                                                            | Method of measurement                                                                                                                                                                                                                                                                                                                                                                                                                                                                                                          | Results                                                                                                                                                                                                                                                                                                                                                                                                                                                                                                                                                                                                               | Parent co-design? | Improved parent satisfaction? |
|-----------------------------------------|---------------------------|-------------------------------------------------|----------------------------------------|------------------------------------------------------------------------------------------------------------------------------------------------------------------------------------------------------------------------------------------------------------------------------------------------------------------------------------------|----------------------------------------------------------------|--------------------------------------------------------------------------------------------------------------------------------------------------------------------------------------------------|--------------------------------------------------------------------------------------------------------------------------------------------------------------------------------------------------------------------------------------------------------------------------------------------------------------------------------------------------------------------------------------------------------------------------------------------------------------------------------------------------------------------------------|-----------------------------------------------------------------------------------------------------------------------------------------------------------------------------------------------------------------------------------------------------------------------------------------------------------------------------------------------------------------------------------------------------------------------------------------------------------------------------------------------------------------------------------------------------------------------------------------------------------------------|-------------------|-------------------------------|
| 1. Northrup et al. (2016), USA          | Mothers and fathers /116  | <28 / level III                                 | Randomised controlled trial            | <p><b>Intervention: Free Parking (FP).</b></p> <p>Parents received 7 parking vouchers at a time (value: \$10/each) and continued to receive vouchers until infant discharge. Each voucher allowed free entry and exit for 24hr.</p> <p><b>Control:</b> Parents received the standard care and did not receive vouchers.</p>              | <b>Parent satisfaction with NICU care</b>                      | <p>After babies were discharged (once)</p> <p>- During the first high-risk-infant clinic visit after discharge</p> <p>No pre-intervention parent satisfaction data available for comparison.</p> | <p><i>Satisfaction questionnaire</i></p> <p><b>Validation:</b> No content validity or reliability testing reported.</p> <p>11 questions</p> <p>- Seven items were summed (score 7-35) to measure "Support" (e.g., information sharing).</p> <p>- Three items measured "Emotional Connection" to the infant (score 3-15)</p> <p>- One item assessed "family involvement in infant care" (responses: not enough-just right-too much).</p> <p>Greater scores indicated higher perceived support, connection and satisfaction.</p> | <p><b>The groups did not differ significantly with respect to satisfaction.</b></p> <p><b>Interv Control p-value</b></p> <p>NICU support<br/><b>Mean (SD)</b> 30(2.7) 28.7(3.7) 0.07</p> <p>Emotional connection<br/>12.3(1.7) 12.3(1.7) 0.96</p> <p>Family involvement "just right"<br/>81.4% 85% 0.07</p>                                                                                                                                                                                                                                                                                                           | No                | 2                             |
| 2. Abdel-Latif et al. (2015), Australia | Mothers and fathers /63   | 25-42 / level III                               | Cross-over Randomised Controlled Trial | <p><b>Intervention: Parental Presence at Clinical Bedside Rounds (PPCBR).</b></p> <p>Parents attended bedside clinical rounds. Parents had opportunity to ask questions about their baby's condition and management.</p> <p><b>Control:</b> Parents received the standard care with no parental presence at bedside clinical rounds.</p> | <b>Parent satisfaction assessed by questions of 3 domains:</b> | <p>During babies' admission (once)</p> <p>- At the end of each study arm, separated by a washout period</p> <p>- No pre-intervention parent satisfaction data available for comparison</p>       | <p><i>Satisfaction questionnaire</i></p> <p>The authors stated "the research team designed the questionnaire".</p> <p><b>Validation:</b> No content validity or reliability testing reported.</p> <p>Number and format of questions: not stated</p>                                                                                                                                                                                                                                                                            | <p><b>PPCBR had significantly higher adjusted mean (95% CI) scores for some questions from domains 1 and 2.</b></p> <p>Domain 3 was comparable between the two study groups.</p> <p><b>Interv Control p-value</b></p> <p>Domain 1 question:<br/>"I have received adequate information about my baby's condition and management"<br/><b>Mean</b> 4.321 3.947 0.03</p> <p>Domain 2 questions:<br/>"In the last week I have been able to communicate effectively with my baby's healthcare team"<br/><b>Mean</b> 4.407 4.250 0.05</p> <p>"In the last week I have collaborated with my baby's healthcare team in the</p> | No                | 1                             |

|                                                                                                                                  |                                      |                                  |                                                                                                |                                                   |                                                                                                                                                                                                                                                                                                                                                                                                                                                                                                                                                                                                                                                             |                                                                                                                                                           |                                                                                                                                                  |                                                                                                                                                                                                                                                                                                                                                                                                                                                                                    |                                                                                                                                                                                                                                                                                                                                                                                                                                                                                                                                                                                              |                                                                                                                                                                                                         |          |
|----------------------------------------------------------------------------------------------------------------------------------|--------------------------------------|----------------------------------|------------------------------------------------------------------------------------------------|---------------------------------------------------|-------------------------------------------------------------------------------------------------------------------------------------------------------------------------------------------------------------------------------------------------------------------------------------------------------------------------------------------------------------------------------------------------------------------------------------------------------------------------------------------------------------------------------------------------------------------------------------------------------------------------------------------------------------|-----------------------------------------------------------------------------------------------------------------------------------------------------------|--------------------------------------------------------------------------------------------------------------------------------------------------|------------------------------------------------------------------------------------------------------------------------------------------------------------------------------------------------------------------------------------------------------------------------------------------------------------------------------------------------------------------------------------------------------------------------------------------------------------------------------------|----------------------------------------------------------------------------------------------------------------------------------------------------------------------------------------------------------------------------------------------------------------------------------------------------------------------------------------------------------------------------------------------------------------------------------------------------------------------------------------------------------------------------------------------------------------------------------------------|---------------------------------------------------------------------------------------------------------------------------------------------------------------------------------------------------------|----------|
|                                                                                                                                  |                                      |                                  |                                                                                                |                                                   |                                                                                                                                                                                                                                                                                                                                                                                                                                                                                                                                                                                                                                                             |                                                                                                                                                           |                                                                                                                                                  | <p>planning of care for my baby”</p> <p><b>Mean</b> 3.843 3.426 0.02</p> <p>“In the last week I have been able to ask the healthcare team questions about my baby’s care”</p> <p><b>Mean</b> 4.642 4.259 0.004</p>                                                                                                                                                                                                                                                                 |                                                                                                                                                                                                                                                                                                                                                                                                                                                                                                                                                                                              |                                                                                                                                                                                                         |          |
| 1<br>2<br>3<br>4<br>5<br>6<br>7<br>8<br>9<br>10<br>11<br>12<br>13<br>14<br>15<br>16<br>17<br>18<br>19<br>20                      | 3. Bastani et al, (2015), Iran       | Mothers /100                     | 30-37 Mean (SD)<br><br>Control: 33.90 (2.33)<br><br>Interv: 34 (1.9)<br><br>/ level not stated | Randomised Controlled Trial (block randomisation) | <b>Intervention: Family-centered Care (FCC).</b><br><br>Mothers allowed access to their baby at any time, participated in the care process and were provided with information about neonatal care.<br><br><b>Control:</b> Mothers received the standard care where they were only allowed to be present at the time of the infant’s entry to the neonatal care unit, and were only routinely informed.                                                                                                                                                                                                                                                      | <b>Maternal satisfaction relating to three themes:</b><br>1. Parental presence<br>2. Participation in neonatal care<br>3. Information about neonatal care | During babies’ admission (twice)<br><br>- 24 hours after admission<br>- At the time of discharge                                                 | <b>Satisfaction questionnaire (Validated)</b><br><br>A modified satisfaction questionnaire was used, based on a parental satisfaction instrument developed for measuring satisfaction in Paediatric intensive care Units (PICU).<br><br>18 questions<br><br>Graded 0 (very dissatisfied) to 4 (very satisfied).<br><br>The overall satisfaction rate was classified based on the mean scores (score<50%, between 75-50% and > 75%).                                                | <b>In the FCC group, pre and post intervention difference in maternal satisfaction was statistically significant p&lt;0.001</b><br><br><b>Interv Control p-value Mean (SD)</b><br><br><b>At 24 hr</b><br>22.36(8.90) 22.06(9.77) 0.87<br><br><b>At discharge</b><br>59.28(6.86) 30.18(14.09) <0.01                                                                                                                                                                                                                                                                                           | <b>Unclear</b><br><br>Mothers determined the reliability of the satisfaction tool and approved the educational pamphlet. Authors did not report if mothers had direct input in the intervention design. | <b>1</b> |
| 21<br>22<br>23<br>24<br>25<br>26<br>27<br>28<br>29<br>30<br>31<br>32<br>33<br>34<br>35<br>36<br>37<br>38<br>39<br>40<br>41<br>42 | 4. Clarke-Pounder et al. (2015), USA | Mothers and fathers /19 families | 23-39 / level III                                                                              | Randomised Controlled Trial                       | <b>Intervention: Sharing information obtained from parent interviews with the primary NICU provider.</b><br><br>Parents interviewed using the <i>NICU- adapted Decision Making Tool (N-DMT)</i> . Information obtained was placed in the electronic medical record (EMR) and shared with the primary neonatal provider via email. Daily rounds on all infants were audio-recorded for 3 days after enrollment to see if information from the N-DMT was incorporated into daily care planning.<br><br><b>Control:</b> The content of a recent social work note was communicated with the primary provider via e-mail, creating an attentional control group. | <b>Parent satisfaction with care</b>                                                                                                                      | During babies’ admission (once)<br><br>- 2 weeks after study entry<br><br>No pre-intervention parent satisfaction data available for comparison. | <b>Satisfaction questionnaire</b><br><br><i>A NICU- adapted Decision Making Tool (N-DMT)</i> – specific questionnaire was used.<br><br><b>Validation:</b> Partially reported. Authors stated reliability testing took place; no information on content validity provided.<br><br>8 questions: e.g. “My baby’s doctors considered my goals and hopes for my baby during decision-making”.<br><br>Likert scale (1 strongly agree-4 strongly disagree). Total N-DMT score range 8–32. | <b>There was no significant difference in satisfaction with care as measured by the N-DMT scale between the control group and intervention groups in a univariable model or multiple variable model controlling for gestational age.</b><br><br><b>Interv Control Median (range)</b><br>26(15–28) 28.8(19–32)<br><br><b>No p-value reported</b><br><br>There was, however, a pattern of decreased satisfaction with care among the intervention group compared to the control group across the N-DMT-specific survey questions, although the differences were not statistically significant. | <b>Yes</b><br><br>Information obtained from parents using the N-DMT was placed in the electronic medical record (EMR) and shared with the primary NICU provider via email (forming the intervention)    | <b>2</b> |
| 43<br>44<br>45<br>46                                                                                                             | 5. Holditch-Davis et al. (2013), USA | Mothers /208                     | Preterm infants                                                                                | Randomised controlled trial                       | <b>Interventions: 1. Mothers were taught how to massage infants with auditory, tactile, visual,</b>                                                                                                                                                                                                                                                                                                                                                                                                                                                                                                                                                         | <b>1. Parent (mother) satisfaction with the</b>                                                                                                           | During admission period and post discharge                                                                                                       | <b>Satisfaction questionnaire</b><br><br>The questionnaire was designed by the study team.                                                                                                                                                                                                                                                                                                                                                                                         | <b>No significant differences occurred between the groups.</b>                                                                                                                                                                                                                                                                                                                                                                                                                                                                                                                               | <b>No</b>                                                                                                                                                                                               | <b>2</b> |

| 1<br>2<br>3<br>4<br>5<br>6<br>7<br>8<br>9<br>10<br>11<br>12<br>13<br>14<br>15<br>16                                                          |                                  | Mean (SD)<br><br>Overall group 27.2 (3.0)<br><br>/ 4 centres, levels II-III | 3 groups (2 intervention and 1 control)<br><br>Post-intervention testing only.                  | <b>and vestibular stimulation (ATVV intervention)</b><br><b>2. Kangaroo care</b><br><br><u>Control:</u> Attention control group. Mothers spent a similar amount of time with the study nurse discussing the equipment needed for preterm infant care at home. Study nurses provided education and support for all three groups. Mothers were not prevented from engaging in interventions of the other groups but did not receive formal education from the study nurse on the other interventions.                                                                                                                                                                                                                                               | <b>intervention</b><br><br><b>2. Satisfaction with the helpfulness of the study nurse</b><br><br><b>3. Whether the mother would recommend the study to others and the degree of change in the mother as a person and as a mother as a result of being in the study.</b>                    | - At the time of discharge<br><br>- At 2 months corrected age<br><br>No pre-intervention parent satisfaction data available for comparison. | <u>Validation:</u> Partially reported. Authors stated reliability testing took place; no information on content validity provided.<br><br><u>26 questions:</u> relating to three dimensions of satisfaction: efficacy, caring, and technical quality.<br><br>Likert (1 least satisfied-5, 5 most satisfied)                                                                                                                                                                                                                                                                | Mothers in all three groups were satisfied with the intervention (mean scores of 3.3 or higher on a 5-point scale) and the helpfulness of the nurse (mean scores of 4.6 or higher on a 5-point scale).                                                                                                                                                                                                                                                                                                                                                                                                                                                                                                                     |    |        |         |           |            |            |  |        |         |           |            |            |                                                                                                                     |   |
|----------------------------------------------------------------------------------------------------------------------------------------------|----------------------------------|-----------------------------------------------------------------------------|-------------------------------------------------------------------------------------------------|---------------------------------------------------------------------------------------------------------------------------------------------------------------------------------------------------------------------------------------------------------------------------------------------------------------------------------------------------------------------------------------------------------------------------------------------------------------------------------------------------------------------------------------------------------------------------------------------------------------------------------------------------------------------------------------------------------------------------------------------------|--------------------------------------------------------------------------------------------------------------------------------------------------------------------------------------------------------------------------------------------------------------------------------------------|---------------------------------------------------------------------------------------------------------------------------------------------|----------------------------------------------------------------------------------------------------------------------------------------------------------------------------------------------------------------------------------------------------------------------------------------------------------------------------------------------------------------------------------------------------------------------------------------------------------------------------------------------------------------------------------------------------------------------------|----------------------------------------------------------------------------------------------------------------------------------------------------------------------------------------------------------------------------------------------------------------------------------------------------------------------------------------------------------------------------------------------------------------------------------------------------------------------------------------------------------------------------------------------------------------------------------------------------------------------------------------------------------------------------------------------------------------------------|----|--------|---------|-----------|------------|------------|--|--------|---------|-----------|------------|------------|---------------------------------------------------------------------------------------------------------------------|---|
| 17<br>18<br>19<br>20<br>21<br>22<br>23<br>24<br>25<br>26<br>27<br>28<br>29<br>30<br>31<br>32<br>33<br>34<br>35<br>36<br>37<br>38<br>39<br>40 | 6. Franck et al. (2011), UK      | Mothers and fathers /169                                                    | Mean (SD)<br><br>Control: 31.94 (5.17)<br><br>Interv: 29.40 (3.17)<br><br>/4 centres, level III | Cluster Randomised Controlled Trial<br><br><u>Intervention:</u> <b>Increasing parental involvement in infant pain management in the NICU.</b><br><br>Parents received a booklet providing evidence-based information about pain and comforting infants in the NICU setting. Parents received 2 visits from a research nurse showing them how to apply the comforting techniques described in the booklet.<br><br><u>Control:</u> As part of usual care, parents in both the intervention and control groups received a detailed booklet with generic information about NICU care. Parents in the control group also received 2 visits from a research nurse listening to what parents had to say about their NICU experience (attention placebo). | At baseline:<br><br><b>1. Parent satisfaction with NICU care</b><br><br>One week after the intervention:<br><br><b>1. Satisfaction with information about pain control</b><br><br><b>2. Satisfied nurses make infant comfortable</b><br><br><b>3. Satisfied pain medicines help infant</b> | During babies' admission (twice)<br><br>-At baseline (within 3 to 7 days of admission)<br><br>- 1 week after the intervention               | <i>Individual questions</i><br><br><u>Validation:</u> No content validity or reliability testing reported.<br><br>1. At baseline:<br><br>Parent satisfaction was measured by 1 question: "Satisfaction with NICU care" (1 very satisfied-6 very unsatisfied) as part of the baseline parent characteristics questionnaire.<br><br>2. One week after the intervention:<br><br>Three questions using the word "satisfied" were selected from the validated <i>Parent Attitudes About Infant Nociception (PAIN)</i> survey (Likert scale 1 very satisfied-6 very unsatisfied) | <b>At baseline: there was no significant difference in satisfaction between intervention and control group</b><br><br><table border="1"> <thead> <tr> <th></th> <th>Interv</th> <th>Control</th> </tr> </thead> <tbody> <tr> <td>Mean (SD)</td> <td>1.45(0.71)</td> <td>1.51(0.76)</td> </tr> </tbody> </table> <p>p-value missing</p><br><b>1 week after the intervention: Intervention parents were more satisfied with the information about pain control received than control parents.</b><br><br><table border="1"> <thead> <tr> <th></th> <th>Interv</th> <th>Control</th> </tr> </thead> <tbody> <tr> <td>Mean (SD)</td> <td>2.10(0.97)</td> <td>3.28(1.27)</td> </tr> </tbody> </table> <p>p-value &lt; 0.001</p> |    | Interv | Control | Mean (SD) | 1.45(0.71) | 1.51(0.76) |  | Interv | Control | Mean (SD) | 2.10(0.97) | 3.28(1.27) | Yes<br><br>The booklet was reviewed by 12 parents of infants who had been cared for in NICUs in the United Kingdom. | 1 |
|                                                                                                                                              | Interv                           | Control                                                                     |                                                                                                 |                                                                                                                                                                                                                                                                                                                                                                                                                                                                                                                                                                                                                                                                                                                                                   |                                                                                                                                                                                                                                                                                            |                                                                                                                                             |                                                                                                                                                                                                                                                                                                                                                                                                                                                                                                                                                                            |                                                                                                                                                                                                                                                                                                                                                                                                                                                                                                                                                                                                                                                                                                                            |    |        |         |           |            |            |  |        |         |           |            |            |                                                                                                                     |   |
| Mean (SD)                                                                                                                                    | 1.45(0.71)                       | 1.51(0.76)                                                                  |                                                                                                 |                                                                                                                                                                                                                                                                                                                                                                                                                                                                                                                                                                                                                                                                                                                                                   |                                                                                                                                                                                                                                                                                            |                                                                                                                                             |                                                                                                                                                                                                                                                                                                                                                                                                                                                                                                                                                                            |                                                                                                                                                                                                                                                                                                                                                                                                                                                                                                                                                                                                                                                                                                                            |    |        |         |           |            |            |  |        |         |           |            |            |                                                                                                                     |   |
|                                                                                                                                              | Interv                           | Control                                                                     |                                                                                                 |                                                                                                                                                                                                                                                                                                                                                                                                                                                                                                                                                                                                                                                                                                                                                   |                                                                                                                                                                                                                                                                                            |                                                                                                                                             |                                                                                                                                                                                                                                                                                                                                                                                                                                                                                                                                                                            |                                                                                                                                                                                                                                                                                                                                                                                                                                                                                                                                                                                                                                                                                                                            |    |        |         |           |            |            |  |        |         |           |            |            |                                                                                                                     |   |
| Mean (SD)                                                                                                                                    | 2.10(0.97)                       | 3.28(1.27)                                                                  |                                                                                                 |                                                                                                                                                                                                                                                                                                                                                                                                                                                                                                                                                                                                                                                                                                                                                   |                                                                                                                                                                                                                                                                                            |                                                                                                                                             |                                                                                                                                                                                                                                                                                                                                                                                                                                                                                                                                                                            |                                                                                                                                                                                                                                                                                                                                                                                                                                                                                                                                                                                                                                                                                                                            |    |        |         |           |            |            |  |        |         |           |            |            |                                                                                                                     |   |
| 41<br>42<br>43<br>44<br>45<br>46                                                                                                             | 7. Livingston et al. (2009), USA | Mothers /12                                                                 | Mean (SD)<br><br>Control:                                                                       | Randomised Controlled Trial<br><br><u>Intervention:</u> <b>Touch and massage.</b><br><br>Mothers attended a 1hr massage class taught by a                                                                                                                                                                                                                                                                                                                                                                                                                                                                                                                                                                                                         | <b>1. Caregiver (mother) satisfaction with the infant's care</b>                                                                                                                                                                                                                           | During babies' admission (three times)<br><br>- At baseline                                                                                 | <i>Satisfaction questionnaire</i><br><br>Two questionnaires were developed by the research team.                                                                                                                                                                                                                                                                                                                                                                                                                                                                           | <b>It is unclear in the report if specific between-group comparisons and statistical analysis were conducted.</b>                                                                                                                                                                                                                                                                                                                                                                                                                                                                                                                                                                                                          | No | 3      |         |           |            |            |  |        |         |           |            |            |                                                                                                                     |   |

| 1<br>2<br>3<br>4<br>5<br>6<br>7<br>8<br>9<br>10<br>11<br>12<br>13<br>14<br>15<br>16<br>17<br>18<br>19<br>20<br>21<br>22<br>23          |                                 | 33.4 (6.4)<br><br>Interv:<br>38.5 (3.1)<br><br>/ level III |                              | nurse CIMI (certified infant massage instructor) and were asked to participate in at least 3 bedside massage instruction sessions taught within the next week. Infants received massage for 7 consecutive days, from the mother or a CIMI. The touch procedure lasted 20 minutes.<br><br><u>Control:</u> Infants received all usual hospital services including medical care, physical and occupational therapy services and developmentally supportive nursing care. | <b>2. Caregiver satisfaction with the neonatal unit and the massage therapist</b>                           | - Upon completing the 7-day massage program<br><br>- 1 month following intervention                                                                                                     | <u>Validation:</u> No content validity or reliability testing reported.<br><br>-1 <sup>st</sup> questionnaire (at baseline): a brief self-report questionnaire about caregiver satisfaction with their infant's care until that moment. No further details reported.<br><br>-2 <sup>nd</sup> questionnaire (upon completing the 7-day massage program and 1 month following intervention): a 10-minute satisfaction questionnaire relating to infant's response and caregiver satisfaction with the neonatal unit and the massage therapist.<br><br><u>Number of questions:</u> not stated.<br><br>Likert scale (1 very dissatisfied-4 very satisfied).<br><br>Sample statements:<br>'How satisfied do you feel giving massage to your infant?'; 'I feel that massage improved my infant's hospital stay.' | <u>At baseline and day 7:</u> All caregivers were highly satisfied with the medical treatment their infant received.<br><br><u>At day 7 and 1 month follow-up:</u> All caregivers participating in the massage group reported high levels of satisfaction regarding their relationship with their infant and the massage program's impact on that relationship.<br><br>Slight improvements in satisfaction regarding time the caregiver spent with the infant and involvement in the infant's care were observed between day 7 and the 1-month follow-up (no further information reported).                                                                                           |  |        |         |                     |                |                   |           |          |
|----------------------------------------------------------------------------------------------------------------------------------------|---------------------------------|------------------------------------------------------------|------------------------------|-----------------------------------------------------------------------------------------------------------------------------------------------------------------------------------------------------------------------------------------------------------------------------------------------------------------------------------------------------------------------------------------------------------------------------------------------------------------------|-------------------------------------------------------------------------------------------------------------|-----------------------------------------------------------------------------------------------------------------------------------------------------------------------------------------|------------------------------------------------------------------------------------------------------------------------------------------------------------------------------------------------------------------------------------------------------------------------------------------------------------------------------------------------------------------------------------------------------------------------------------------------------------------------------------------------------------------------------------------------------------------------------------------------------------------------------------------------------------------------------------------------------------------------------------------------------------------------------------------------------------|---------------------------------------------------------------------------------------------------------------------------------------------------------------------------------------------------------------------------------------------------------------------------------------------------------------------------------------------------------------------------------------------------------------------------------------------------------------------------------------------------------------------------------------------------------------------------------------------------------------------------------------------------------------------------------------|--|--------|---------|---------------------|----------------|-------------------|-----------|----------|
| 24<br>25<br>26<br>27<br>28<br>29<br>30<br>31<br>32<br>33<br>34<br>35<br>36<br>37<br>38<br>39<br>40<br>41<br>42<br>43<br>44<br>45<br>46 | 8. Koh et al. (2007), Australia | Mothers /200<br><br>Not stated / not stated                | Randomised, Controlled Trial | <u>Intervention: Provision of taped conversations with neonatologists to mothers.</u><br><br>The initial conversation and subsequent conversations of significance with a neonatologist were taped and analysed (for both groups). Mothers received a tape of each conversation and a tape recorder.<br><br><u>Control:</u> Usual care. Mothers were not given the tape or recorder.                                                                                  | <b>Satisfaction with conversations held with the neonatologist</b><br><br><b>Satisfaction with the tape</b> | During admission period and post discharge<br><br>- At 10 days<br><br>- At 4 months<br><br>- At 12 months<br><br>No pre-intervention parent satisfaction data available for comparison. | <i>Individual questions and a satisfaction scale</i><br><u>Validation:</u> No content validity or reliability testing reported.<br><br><u>Number of questions:</u> not stated.<br><br>Likert scale (1-5 most satisfied)<br><br>Questions related to: Satisfaction with amount and quality of information presented, doctors' communication skills, patient's participation in the conversation.<br><br>A satisfaction scale was used to assess:<br>Satisfaction with the tape                                                                                                                                                                                                                                                                                                                              | No differences were found between the two groups in satisfaction with conversations.<br><br><b>Mothers of babies with a poor outcome in the tape group were, however, significantly more satisfied with the conversations:</b><br><br><table border="1"> <thead> <tr> <th></th> <th>Interv</th> <th>Control</th> </tr> </thead> <tbody> <tr> <td><b>Mean (95%CI)</b></td> <td>115(104-123.2)</td> <td>100.5(94.1-109.4)</td> </tr> </tbody> </table> <p><b>p-value 0.0051</b></p> <p>Most (71-92%) of the mothers given the tapes stated that they helped their understanding, reminded them of what had been said, and helped their family to understand and recall information.</p> |  | Interv | Control | <b>Mean (95%CI)</b> | 115(104-123.2) | 100.5(94.1-109.4) | <b>No</b> | <b>1</b> |
|                                                                                                                                        | Interv                          | Control                                                    |                              |                                                                                                                                                                                                                                                                                                                                                                                                                                                                       |                                                                                                             |                                                                                                                                                                                         |                                                                                                                                                                                                                                                                                                                                                                                                                                                                                                                                                                                                                                                                                                                                                                                                            |                                                                                                                                                                                                                                                                                                                                                                                                                                                                                                                                                                                                                                                                                       |  |        |         |                     |                |                   |           |          |
| <b>Mean (95%CI)</b>                                                                                                                    | 115(104-123.2)                  | 100.5(94.1-109.4)                                          |                              |                                                                                                                                                                                                                                                                                                                                                                                                                                                                       |                                                                                                             |                                                                                                                                                                                         |                                                                                                                                                                                                                                                                                                                                                                                                                                                                                                                                                                                                                                                                                                                                                                                                            |                                                                                                                                                                                                                                                                                                                                                                                                                                                                                                                                                                                                                                                                                       |  |        |         |                     |                |                   |           |          |

|                                                                                                                |                                           |                         |                                                                             |                              |                                                                                                                                                                                                                                                                                                                                                                                                                                      |                                                                                         |                                                                                                                                                                                                                                                                                                        |                                                                                                                                                                                                                                                                                                                                                                                                                                                                                                                            |                                                                                                                                                                                                                                                                                                                                                                                                                                                                                                                                                                             |    |   |
|----------------------------------------------------------------------------------------------------------------|-------------------------------------------|-------------------------|-----------------------------------------------------------------------------|------------------------------|--------------------------------------------------------------------------------------------------------------------------------------------------------------------------------------------------------------------------------------------------------------------------------------------------------------------------------------------------------------------------------------------------------------------------------------|-----------------------------------------------------------------------------------------|--------------------------------------------------------------------------------------------------------------------------------------------------------------------------------------------------------------------------------------------------------------------------------------------------------|----------------------------------------------------------------------------------------------------------------------------------------------------------------------------------------------------------------------------------------------------------------------------------------------------------------------------------------------------------------------------------------------------------------------------------------------------------------------------------------------------------------------------|-----------------------------------------------------------------------------------------------------------------------------------------------------------------------------------------------------------------------------------------------------------------------------------------------------------------------------------------------------------------------------------------------------------------------------------------------------------------------------------------------------------------------------------------------------------------------------|----|---|
| 1<br>2<br>3<br>4<br>5<br>6<br>7<br>8<br>9<br>10<br>11<br>12<br>13<br>14                                        | 9. Mitchell-DiCenso et al. (1996), Canada | Mothers and fathers/482 | Mean (SD)<br>Interv: 35.1 (4.5)<br><br>Control: 35 (4.3)<br><br>/ level III | Randomised, Controlled Trial | <b>Intervention: Clinical Nurse Specialist/ neonatal practitioner team (CNS/NP) care.</b><br><br>Infants of intervention parents were assigned to be cared for by the Clinical nurse special/neonatal practitioner CNS/NP team during the day and by paediatric residents during the night.<br><br><b>Control:</b> Paediatric residents cared for infants of control parents around the clock. Neonatologists supervised both teams. | <b>Parent satisfaction with care</b>                                                    | During admission period and post discharge (twice)<br><br>- On 5 <sup>th</sup> day after admission (full survey)<br><br>- After discharge over the phone (only questions related to satisfaction with discharge process)<br><br>No pre-intervention parent satisfaction data available for comparison. | <i>Satisfaction questionnaire (Validated)</i><br><br>The study team developed and used the validated <i>Neonatal Index of Parent Satisfaction (NIPS)</i> questionnaire.<br><br><u>Number of questions:</u> not stated.<br><br>NIPS score range (27-189); higher scores indicating greater satisfaction with care.                                                                                                                                                                                                          | <b>No statistically significant difference between groups.</b><br><br><b>Interv Control p-value</b><br>NIPS 140 139 0.67<br><b>Mean</b><br><br><b>Difference in means</b> 1.0, CI (-3.6-5.6)                                                                                                                                                                                                                                                                                                                                                                                | No | 2 |
| 15<br>16<br>17<br>18<br>19<br>20<br>21<br>22<br>23<br>24<br>25<br>26<br>27<br>28<br>29<br>30<br>31<br>32<br>33 | 10. Broyles et al. (1992), USA            | Mothers /25             | Mean (SD)<br>Control: 34 (4)<br><br>Interv: 33.4 (4)<br><br>/ level III     | Randomised Controlled Trial  | <b>Intervention: Detailed consent.</b><br><br>Mothers were given information about mechanical ventilation. Detailed risk/benefit disclosure was provided both verbally and in writing.<br><br><b>Control:</b> Mothers were given a brief verbal description about mechanical ventilation supplemented with detailed verbal and written disclosure if desired by them (flexible consent).                                             | <b>Maternal satisfaction with the information provided about mechanical ventilation</b> | During babies' admission (once)<br><br>- 24-48 hours after the intervention<br><br>No pre-intervention parent satisfaction data available for comparison.                                                                                                                                              | <i>An interview</i> evaluating maternal satisfaction with the information provided about mechanical ventilation.<br><br><u>Validation:</u> A psychiatrist with a special interest in interviewing techniques was consulted in designing and standardising this assessment.<br><br>A research nurse conducted the interview, "checking" each mother against one option regarding:<br>- Amount of information: Right amount-Too much-Too little<br><br>- Information made coping: More Difficult-Easier-No effect-Uncertain. | This study is measuring and comparing satisfaction with two different interventions (detailed vs flexible consent process), neither of which formally represent the usual routine care for all babies (no control).<br><br><b>Small numbers. No data indicating statistical analysis conducted or evidence of statistically significant results.</b><br><br><b>Detailed Flexible</b><br><b>Right</b> 75% mothers 100%<br><b>amount of information</b><br><br><b>Too</b> 25% mothers<br><b>little information</b><br><br><b>Made</b> 67% mothers 69%<br><b>coping easier</b> | No | 3 |

## Non-Randomised controlled trials (Non-RCT) by publication year

| Author (Date), Country             | Parents' gender/sample Size | Infant Gestation age (GA) in weeks /NICU level                          | Study design                                                                                                                                      | Intervention                                                                                                                                                                                                                                                                                                                                                                                             | Outcome measures                                                                                                                                                                 | Timing of measurement                                                                                                                                                                                                        | Method of measurement                                                                                                                                                                                                                                                                                                                                                                                                                                                                                                                          | Results                                                                                                                                                                                                                                                                                                                                                                                                                                                                                                    | Parent co-design? | Improved parent satisfaction? |         |               |            |         |    |   |
|------------------------------------|-----------------------------|-------------------------------------------------------------------------|---------------------------------------------------------------------------------------------------------------------------------------------------|----------------------------------------------------------------------------------------------------------------------------------------------------------------------------------------------------------------------------------------------------------------------------------------------------------------------------------------------------------------------------------------------------------|----------------------------------------------------------------------------------------------------------------------------------------------------------------------------------|------------------------------------------------------------------------------------------------------------------------------------------------------------------------------------------------------------------------------|------------------------------------------------------------------------------------------------------------------------------------------------------------------------------------------------------------------------------------------------------------------------------------------------------------------------------------------------------------------------------------------------------------------------------------------------------------------------------------------------------------------------------------------------|------------------------------------------------------------------------------------------------------------------------------------------------------------------------------------------------------------------------------------------------------------------------------------------------------------------------------------------------------------------------------------------------------------------------------------------------------------------------------------------------------------|-------------------|-------------------------------|---------|---------------|------------|---------|----|---|
| 1. De Bernardo et al (2017), Italy | Mothers and Fathers /96     | Mean (SD)<br>Control: 34.2 (5.25)<br>Interv: 32.7 (5.25)<br>/ level III | Non-randomized, prospective cohort pilot study<br><br><i>Unit level effect:</i><br>Two different time periods                                     | <b>Intervention: FCC (Family-Centered Care).</b><br><br>Parents had access to NICU for 8 hours/day. The NICU was widened and paediatric nurses taught parents procedures/practices for 10 days. Parents could observe clinical bedside rounds, hold meetings with the physicians, use the rooms and kitchen.<br><br><b>Control:</b> Parents were permitted to visit their baby in NICU for 1 hour a day. | <b>Parent satisfaction relating to 3 specific domains:</b><br><br>1. Knowledge and Understanding<br><br>2. Communication and Collaboration<br><br>3. Privacy and confidentiality | During babies' admission (once)<br><br>- At discharge (pre-FCC cohort and post-FCC cohort)<br><br>No pre-intervention parent satisfaction data available for comparison (different parent groups pre and post intervention). | <b>Satisfaction questionnaire.</b><br><br><b>Validation:</b> The authors state the survey "was designed and validated by Abdel-Latif et al". No content validity or reliability testing reported in the original paper.<br><br>9 questions<br><br>3 questions: Related to adequate and timely information about the baby's condition.<br><br>3 questions: Related to communication and collaboration with the healthcare team.<br><br>3 questions: Related to respect of patient privacy.<br><br>Likert (1 strongly disagree-5 strongly agree) | <b>7/9 individual statements in the parent satisfaction questionnaire scored higher in the FCC compared to the NFCC (statistically significant difference).</b><br><br>Example statement:<br>"I have received adequate information about my baby's condition and management."<br><br><table border="1"> <thead> <tr> <th></th> <th>Interv</th> <th>Control</th> </tr> </thead> <tbody> <tr> <td><b>Median</b></td> <td>5 (3.45-5)</td> <td>4 (3-5)</td> </tr> </tbody> </table><br><b>p-value &lt;0.05</b> |                   | Interv                        | Control | <b>Median</b> | 5 (3.45-5) | 4 (3-5) | No | 1 |
|                                    | Interv                      | Control                                                                 |                                                                                                                                                   |                                                                                                                                                                                                                                                                                                                                                                                                          |                                                                                                                                                                                  |                                                                                                                                                                                                                              |                                                                                                                                                                                                                                                                                                                                                                                                                                                                                                                                                |                                                                                                                                                                                                                                                                                                                                                                                                                                                                                                            |                   |                               |         |               |            |         |    |   |
| <b>Median</b>                      | 5 (3.45-5)                  | 4 (3-5)                                                                 |                                                                                                                                                   |                                                                                                                                                                                                                                                                                                                                                                                                          |                                                                                                                                                                                  |                                                                                                                                                                                                                              |                                                                                                                                                                                                                                                                                                                                                                                                                                                                                                                                                |                                                                                                                                                                                                                                                                                                                                                                                                                                                                                                            |                   |                               |         |               |            |         |    |   |
| 2. Kadivar et al. (2017), Iran     | Mothers /68                 | <=30 - 36<br>/ level not stated                                         | Non-randomised, Convenience sampling.<br><br><i>Group level effect:</i><br>Intervention/control groups.<br><br>Pre and post-intervention testing. | <b>Intervention: Internet-based education.</b><br><br>Mothers used an educational website set up by the research team (files and clips). Mothers could visit the website from 5:00-6:00 pm for 10 days. They were also allowed to use the website outside of the above hours and to report the duration of using the website to the researcher. Mothers had                                              | <b>Maternal satisfaction</b>                                                                                                                                                     | During babies' admission (twice)<br><br>- Day 1 of intervention<br><br>- Day 10 of intervention                                                                                                                              | <b>Satisfaction questionnaire (Validated)</b><br><br>The "What Being The Parent of a Baby is Like-Revised" Questionnaire (WBPL- Revised) was used. The original English version by Pridham and Chang was translated to Persian.<br><br>11 questions<br><br>Total satisfaction score range (11-99)                                                                                                                                                                                                                                              | There was a significant difference in the mean score of satisfaction between cases and controls while the mean score of satisfaction increased in both groups.<br><br><b>Comparison of the mean score between the two groups showed that the level of satisfaction was significantly higher in the case group versus the control group.</b>                                                                                                                                                                | No                | 1                             |         |               |            |         |    |   |

|                                                                                                                                  |                                |               |                                                                                         |                                                                                                                                                |                                                                                                                                                                                                                                                                                                 |                                                                                                                                           |                                                                                                                                                 |                                                                                                                                                                                                                                                                                             |                                                                                                                                                                                                                                                                                                                                                                                                                                                                                                                                                               |    |   |
|----------------------------------------------------------------------------------------------------------------------------------|--------------------------------|---------------|-----------------------------------------------------------------------------------------|------------------------------------------------------------------------------------------------------------------------------------------------|-------------------------------------------------------------------------------------------------------------------------------------------------------------------------------------------------------------------------------------------------------------------------------------------------|-------------------------------------------------------------------------------------------------------------------------------------------|-------------------------------------------------------------------------------------------------------------------------------------------------|---------------------------------------------------------------------------------------------------------------------------------------------------------------------------------------------------------------------------------------------------------------------------------------------|---------------------------------------------------------------------------------------------------------------------------------------------------------------------------------------------------------------------------------------------------------------------------------------------------------------------------------------------------------------------------------------------------------------------------------------------------------------------------------------------------------------------------------------------------------------|----|---|
|                                                                                                                                  |                                |               |                                                                                         | to use the website at least 3 times during 10 days, each time for at least 30 min.                                                             |                                                                                                                                                                                                                                                                                                 |                                                                                                                                           |                                                                                                                                                 | <p><b>Interv Control before intervention</b><br/> <b>Mean</b> 81.62(13.50) 85.71(9.46)<br/> <b>(SD)</b><br/> <b>p-value</b> 0.993</p> <p><b>after intervention</b><br/> <b>Mean</b> 93.88 (5.38) 90.12 (7.78)<br/> <b>(SD)</b><br/> <b>p-value</b> 0.024</p>                                |                                                                                                                                                                                                                                                                                                                                                                                                                                                                                                                                                               |    |   |
| 1<br>2<br>3<br>4<br>5<br>6<br>7<br>8<br>9<br>10<br>11<br>12                                                                      | 3. Kadivar et al. (2017), Iran | Mothers /70   | Mean (SD)<br><br>Control 31.6 (2.4)<br><br>Interv: 32.9 (3.1)<br><br>/ level not stated | Non-randomised, Convenience sampling.<br><br><i>Unit level effect:</i><br>Two different time periods                                           | <b>Intervention: Narrative writing.</b><br><br>Mothers did narrative writing at least 3 times until the 10th day of admission.<br><br><b>Control:</b> Mothers in the control group received the routine NICU treatment and care.                                                                | <b>Mothers' satisfaction with medical care provided by physicians, medical students, and nurses during neonatal admission to the NICU</b> | During babies' admission (twice)<br><br>- Day 3 of intervention<br><br>- Day 10 of intervention                                                 | <i>Satisfaction questionnaire (Validated)</i><br><br>The NIPS questionnaire by Mitchell et al was used and translated to Persian.<br><br>24 questions (Likert scale)<br><br>Likert (1 always or not satisfied-7 never or completely satisfied). A higher score indicates more satisfaction. | <b>The satisfaction level of the mothers in the intervention group increased significantly during the study.</b><br><br>The results of independent t test showed a significant difference in the satisfaction changes of the mothers on the 3rd and 10th day of NICU admission between intervention and control groups, indicating the effectiveness of narrative writing.<br><br>The results of paired t-test also showed a significant difference in the mean satisfaction level of the mothers between the 3rd and the 10th day in the intervention group. | No | 1 |
| 13<br>14<br>15<br>16<br>17<br>18<br>19<br>20<br>21<br>22<br>23<br>24<br>25<br>26<br>27<br>28<br>29<br>30<br>31<br>32<br>33<br>34 | 4. Garingo et al. (2016), USA  | Not stated /9 | 23-39 / level III                                                                       | Non-randomised, Convenience sampling.<br><br><i>Group level effect:</i><br>Intervention/ control groups<br><br>Post-intervention group testing | <b>Intervention: Tele-rounding.</b><br><br>Infants of intervention parents were cared for by an OFFSN (off site neonatologist) who was present via a remote-controlled robot. The OFFSN assessed infants via the robot's integrated stethoscope, with assistance from the nursing staff. During | <b>Satisfaction with telemedicine</b>                                                                                                     | During babies' admission (once)<br><br>- At the time of discharge<br><br>No pre-intervention parent satisfaction data available for comparison. | <i>Satisfaction questionnaire</i><br><br><b>Validation:</b> No content validity or reliability testing reported.<br><br><b>Number of questions:</b> not stated.<br><br>Likert (1 excellent-5 very poor).                                                                                    | <b>Only the intervention group was assessed and only post-intervention.</b><br><br>The authors reported that the parents surveyed were "satisfied with their experience. 100% responded that they felt comfortable talking to the OFFSN on the mobile robot and would allow their infant or themselves to be cared for by a physician via telemedicine in the future."                                                                                                                                                                                        | No | 4 |
| 35<br>36<br>37<br>38<br>39<br>40<br>41<br>42<br>43<br>44<br>45<br>46                                                             |                                |               |                                                                                         |                                                                                                                                                |                                                                                                                                                                                                                                                                                                 |                                                                                                                                           |                                                                                                                                                 | <p><b>Interv Control After intervention</b><br/> <b>Mean</b> 137 (15.2) 102.3 (25.6)<br/> <b>(SD)</b><br/> <b>p-value</b> 0.001</p>                                                                                                                                                         |                                                                                                                                                                                                                                                                                                                                                                                                                                                                                                                                                               |    |   |



|                                                                                                                                                                                              |                                 |                                                  |                                    |                                                                                                                                                                                                                                                                                                                                                                                                                                   |                                                                                                                                                                                                                                                                                                                                                                                                                                                                                                                                                                                                                                 |                                                                                                                                                                                                         |                                                                                                                                                                                                                      |                                                                                                                                                                                                                                                                                                                                                                                                                                                                                                                                                                                                                                                                                                                                                                                                                                                                  |                                                                                                                                                                                                                                                                                                                                                                                                                                                                                                                                                                                                                                                                                                                                                                                                                                                                                                                                                  |    |   |
|----------------------------------------------------------------------------------------------------------------------------------------------------------------------------------------------|---------------------------------|--------------------------------------------------|------------------------------------|-----------------------------------------------------------------------------------------------------------------------------------------------------------------------------------------------------------------------------------------------------------------------------------------------------------------------------------------------------------------------------------------------------------------------------------|---------------------------------------------------------------------------------------------------------------------------------------------------------------------------------------------------------------------------------------------------------------------------------------------------------------------------------------------------------------------------------------------------------------------------------------------------------------------------------------------------------------------------------------------------------------------------------------------------------------------------------|---------------------------------------------------------------------------------------------------------------------------------------------------------------------------------------------------------|----------------------------------------------------------------------------------------------------------------------------------------------------------------------------------------------------------------------|------------------------------------------------------------------------------------------------------------------------------------------------------------------------------------------------------------------------------------------------------------------------------------------------------------------------------------------------------------------------------------------------------------------------------------------------------------------------------------------------------------------------------------------------------------------------------------------------------------------------------------------------------------------------------------------------------------------------------------------------------------------------------------------------------------------------------------------------------------------|--------------------------------------------------------------------------------------------------------------------------------------------------------------------------------------------------------------------------------------------------------------------------------------------------------------------------------------------------------------------------------------------------------------------------------------------------------------------------------------------------------------------------------------------------------------------------------------------------------------------------------------------------------------------------------------------------------------------------------------------------------------------------------------------------------------------------------------------------------------------------------------------------------------------------------------------------|----|---|
| 1<br>2<br>3<br>4<br>5<br>6<br>7<br>8<br>9<br>10<br>11<br>12<br>13<br>14                                                                                                                      |                                 |                                                  | only                               | <p>routine hours the OFFSN was called to discuss any issues with the patient. Emergencies/out of hours were covered by an ONSN (on site neonatologist).</p> <p><u>Control:</u> Infants of control parents received ONSN care. The attending neonatologist made daily patient rounds with the NICU team. After patient rounds, the NICU staff, under the supervision of the attending neonatologist implemented the care plan.</p> |                                                                                                                                                                                                                                                                                                                                                                                                                                                                                                                                                                                                                                 |                                                                                                                                                                                                         |                                                                                                                                                                                                                      |                                                                                                                                                                                                                                                                                                                                                                                                                                                                                                                                                                                                                                                                                                                                                                                                                                                                  |                                                                                                                                                                                                                                                                                                                                                                                                                                                                                                                                                                                                                                                                                                                                                                                                                                                                                                                                                  |    |   |
| 15<br>16<br>17<br>18<br>19<br>20<br>21<br>22<br>23<br>24<br>25<br>26<br>27<br>28<br>29<br>30<br>31<br>32<br>33<br>34<br>35<br>36<br>37<br>38<br>39<br>40<br>41<br>42<br>43<br>44<br>45<br>46 | 5. Globus et al. (2016), Israel | Mothers and fathers /Total surveys returned: 178 | ~40% in each group <32 / level III | <p>Non-randomised, Convenience sampling.</p> <p><i>Unit level effect:</i> Two different time periods</p>                                                                                                                                                                                                                                                                                                                          | <p><u>Intervention:</u> <b>SMS-Short Message Services Implementation.</b></p> <p>Parents were updated daily regarding the health status of their infant via SMS (short-message-services) from the Electronic Patient Record. All SMS messages were sent at 09:00am, including one-sentence sections with updated information (e.g. location of the infant's crib and current weight). Information regarding acute events/deterioration of the infant's medical condition was not included in the SMS, but was delivered personally to the parents in real time.</p> <p><u>Control:</u> Routine care pre-SMS implementation.</p> | <p><b>1. Parent satisfaction related to parent communication with the medical staff</b></p> <p><b>2. Overall parent satisfaction with treatment and staff attitudes throughout hospitalisation.</b></p> | <p>During babies' admission (once)</p> <p>- pre-SMS cohort and post-SMS cohort</p> <p>No pre-intervention parent satisfaction data available for comparison (different parent groups pre and post intervention).</p> | <p><i>Satisfaction questionnaire</i></p> <p>The "Parents' attitudes regarding their experience during their infants' hospitalisation in the NICU" questionnaire was used, as well as selected items from a literature review of similar questionnaires, including that by York Hospital and by Conner and Nelson.</p> <p><u>Validation:</u> No content validity or reliability testing reported.</p> <p>Selected items related to four aspects of the NICU experience. 2 out of 4 directly assessed parent satisfaction:</p> <p>1. Parental assessment of their communication with the medical staff.</p> <p>Likert scale (1 do not agree at all-5 strongly agree)</p> <p>2. Overall satisfaction with treatment and staff attitudes throughout hospitalisation.</p> <p>Visual analog scale (scores range 0-10). Higher scores reflect greater satisfaction.</p> | <p>Overall, in both periods, parents expressed a high degree of satisfaction regarding the medical treatment, the information given and the communication with the medical staff. Overall satisfaction with treatment and with staff attitudes throughout hospitalisation was slightly greater in the post-SMS cohort but did not reach statistical significance.</p> <p><b>In the post-SMS cohort, a statistically significant improvement was noted regarding physician availability and patience, parental feelings of comfort in approaching the physicians and nurses, and regularly receiving information regarding the infants' medical status from the physicians.</b></p> <p style="text-align: right;"> <b>Post SMS    Pre SMS</b><br/> <b>Mean (SD)</b> 4.1 (1.0)    3.7 (1.3)<br/> <b>p-value</b> 0.03<br/> <i>Specific question: "I was pleased with the frequency with which I received information regarding my infant".</i> </p> | No | 1 |

|    |            |             |             |                    |                                  |                          |                     |                                                                                                         |                                    |           |          |
|----|------------|-------------|-------------|--------------------|----------------------------------|--------------------------|---------------------|---------------------------------------------------------------------------------------------------------|------------------------------------|-----------|----------|
| 1  |            |             |             |                    |                                  |                          |                     | Although improvement in all other categories was documented, it did not reach statistical significance. |                                    |           |          |
| 2  | 6.Kazemia  | Mothers     | >37         | Non-               | <u>Intervention: Rooming-</u>    | <i>Maternal</i>          | During babies'      | <i>Satisfaction questionnaire</i>                                                                       | <b>The level of satisfaction</b>   | <b>No</b> | <b>1</b> |
| 3  | n et al.   | /220        | / level not | randomised,        | <u>in care.</u>                  | <i>satisfaction with</i> | admission (once)    | <i>Validation: No content</i>                                                                           | <b>was significantly higher in</b> |           |          |
| 4  | (2016),    | newborns    | stated      | Convenience        | Mothers and babies were          | <i>the neonatal</i>      | -Not stated exactly | validity or reliability                                                                                 | <b>the intervention group,</b>     |           |          |
| 5  | Iran       | (assumed    |             | sampling.          | admitted to a different          | <i>care services</i>     | when                | testing reported.                                                                                       | <b>compared to that in the</b>     |           |          |
| 6  |            | 220         |             |                    | atmosphere to the                | <i>and hospital</i>      | No pre-intervention | The authors state, "a validated                                                                         | <b>control group.</b>              |           |          |
| 7  |            | mothers)    |             | <i>Group level</i> | This facilitated the mothers     | <i>stay comfort</i>      | parent satisfaction | <i>self-made questionnaire was</i>                                                                      |                                    |           |          |
| 8  |            |             |             | effect:            | and neonates with                |                          | data available for  | <i>employed, which was filled in by</i>                                                                 |                                    |           |          |
| 9  |            |             |             | Intervention/      | separate beds along with         |                          | comparison.         | <i>some trained midwives." No</i>                                                                       |                                    |           |          |
| 10 |            |             |             | control groups     | phototherapy devices             |                          |                     | <i>further information on</i>                                                                           |                                    |           |          |
| 11 |            |             |             |                    | and nursing clinical             |                          |                     | <i>validation processes, number</i>                                                                     |                                    |           |          |
| 12 |            |             |             | Post-              | supervision.                     |                          |                     | <i>of questions or name of the</i>                                                                      |                                    |           |          |
| 13 |            |             |             | intervention       | <u>Control: The routine care</u> |                          |                     | <i>questionnaire was provided.</i>                                                                      |                                    |           |          |
| 14 |            |             |             | testing only       | practiced in this neonatal       |                          |                     | Likert (5 very satisfied-1                                                                              |                                    |           |          |
| 15 |            |             |             |                    | unit supported partial           |                          |                     | dissatisfied).                                                                                          |                                    |           |          |
| 16 |            |             |             |                    | stay of mothers beside           |                          |                     |                                                                                                         |                                    |           |          |
| 17 |            |             |             |                    | their neonates, while            |                          |                     |                                                                                                         |                                    |           |          |
| 18 |            |             |             |                    | sitting on chairs;               |                          |                     |                                                                                                         |                                    |           |          |
| 19 |            |             |             |                    | however, most of the             |                          |                     |                                                                                                         |                                    |           |          |
| 20 |            |             |             |                    | time the mother-infant           |                          |                     |                                                                                                         |                                    |           |          |
| 21 | 7. Petteys | Not         | 24-36+ /    | A prospective      | <u>Intervention: PC</u>          | <i>Overall</i>           | During babies'      | <i>Satisfaction questionnaire</i>                                                                       | <b>Parent satisfaction</b>         | <b>No</b> | <b>3</b> |
| 22 | et al.     | stated/ 10  | level III   | cohort design.     | <u>(Palliative care).</u>        | <i>satisfaction with</i> | admission (once)    | A researcher-created                                                                                    | <b>response numbers were</b>       |           |          |
| 23 | (2015),    | parents     |             | A feasibility      | PC nurses provided               | <i>care received</i>     | - At discharge (or  | questionnaire based on                                                                                  | <b>small (n= 10), thus</b>         |           |          |
| 24 | USA        | included in |             | study.             | important continuity of          |                          | study closure for   | extensive current literature                                                                            | <b>statistical comparison of</b>   |           |          |
| 25 |            | sample      |             |                    | care for NICU infants            |                          | infants who         | review.                                                                                                 | <b>parental satisfaction</b>       |           |          |
| 26 |            | analysis    |             | <i>Group level</i> | clinically requiring PC          |                          | remained            | <i>Validation: Partially</i>                                                                            | <b>between cohorts was not</b>     |           |          |
| 27 |            |             |             | effect:            | and at least weekly              |                          | hospitalised)       | reported. Authors stated                                                                                | <b>possible.</b>                   |           |          |
| 28 |            |             |             | Intervention/      | verbal support of                |                          | No pre-intervention | content validity testing                                                                                | However, 100% of responding        |           |          |
| 29 |            |             |             | control groups     | parents. The PC service          |                          | parent satisfaction | took place; no information                                                                              | PC parents (n= 2) reported         |           |          |
| 30 |            |             |             |                    | also coordinated family          |                          | data available for  | on reliability testing                                                                                  | being "extremely satisfied" with   |           |          |
| 31 |            |             |             | Post-              | conferences, provided or         |                          | comparison.         | provided.                                                                                               | care, whereas only 50% of          |           |          |
| 32 |            |             |             | intervention       | requested orders to              |                          |                     | 1 question                                                                                              | responding usual care parents      |           |          |
| 33 |            |             |             | testing only       | improve infant symptom           |                          |                     | Likert (1 extremely                                                                                     | (n= 4) reported extreme            |           |          |
| 34 |            |             |             |                    | management and                   |                          |                     | dissatisfied-4 to extremely                                                                             | satisfaction.                      |           |          |
| 35 |            |             |             |                    | comfort, and addressed           |                          |                     | satisfied).                                                                                             |                                    |           |          |
| 36 |            |             |             |                    | parental coping and self-        |                          |                     | Optional free text (description                                                                         |                                    |           |          |
| 37 |            |             |             |                    | care.                            |                          |                     | of specific experiences                                                                                 |                                    |           |          |
| 38 |            |             |             |                    | <u>Control: Usual clinical</u>   |                          |                     | impacting satisfaction with                                                                             |                                    |           |          |
| 39 |            |             |             |                    | care for infants not             |                          |                     | care)                                                                                                   |                                    |           |          |
| 40 |            |             |             |                    | requiring PC.                    |                          |                     |                                                                                                         |                                    |           |          |

|                                                                                                       |                                       |                 |                                    |                                                                                                                                         |                                                                                                                                                                                                                                                                                                                                                                                              |                                                                                    |                                                                                                                                                                                                           |                                                                                                                                                                                                                                                                                                                                                      |                                                                                                                                                                                                                                                                                                                                                                                                                                                                                                                                                                                                     |                                                                                                                                                                                                             |          |
|-------------------------------------------------------------------------------------------------------|---------------------------------------|-----------------|------------------------------------|-----------------------------------------------------------------------------------------------------------------------------------------|----------------------------------------------------------------------------------------------------------------------------------------------------------------------------------------------------------------------------------------------------------------------------------------------------------------------------------------------------------------------------------------------|------------------------------------------------------------------------------------|-----------------------------------------------------------------------------------------------------------------------------------------------------------------------------------------------------------|------------------------------------------------------------------------------------------------------------------------------------------------------------------------------------------------------------------------------------------------------------------------------------------------------------------------------------------------------|-----------------------------------------------------------------------------------------------------------------------------------------------------------------------------------------------------------------------------------------------------------------------------------------------------------------------------------------------------------------------------------------------------------------------------------------------------------------------------------------------------------------------------------------------------------------------------------------------------|-------------------------------------------------------------------------------------------------------------------------------------------------------------------------------------------------------------|----------|
| 1<br>2<br>3<br>4<br>5<br>6<br>7<br>8<br>9<br>10<br>11<br>12<br>13<br>14<br>15<br>16<br>17<br>18<br>19 | 8. Van de Vijver and Evans (2015), UK | Not stated /105 | Not stated / not stated            | Non-randomised, Convenience sampling.<br><br><i>Unit level effect:</i><br>Three different time periods                                  | <b>Intervention: Baby diary.</b><br><br>Each parent received a communication diary on their infant's admission to the unit. Staff wrote-in infant status updates and kept an infant interaction log with parents. Parents wrote in memories and questions for staff to address during face-to-face communication.<br><br><b>Control:</b> Routine care, before implementation of the diaries. | <b>Satisfaction with communication from neonatal staff</b>                         | During babies' admission (three times)<br><br>- On the day of babies' discharge at study baseline<br><br>- On the day of babies' discharge at 1 month<br><br>On the day of babies' discharge at 15 months | <i>Satisfaction questionnaire</i><br><br>The study team designed a questionnaire, based on the Department of Health and the National Institute for Health and Care Excellence (NICE) quality standards for specialist neonatal care.<br><br><b>Validation:</b> No content validity or reliability testing reported.<br><br>5 questions ("yes or no") | <b>Small numbers. No data indicating statistical analysis conducted or evidence of statistically significant results.</b><br><br>"I was receiving regular communication from staff"<br>94% - 1 month post diary cohort<br>93% - 15 months post diary cohort<br>77% - pre diary cohort<br><br>"My questions and concerns were being addressed"<br>100% - 1 month post diary cohort<br>93% - 15 months post diary cohort<br>91% - pre diary cohort<br><br>"I feel more involved in my baby's care"<br>92% - 1 month post diary cohort<br>100% - 15 months post diary cohort<br>88% - pre diary cohort | <b>Yes.</b><br><br>The intervention concept was created by the project leaders following analysis of baseline survey results and used after multi-disciplinary input and discussion with staff and parents. | <b>3</b> |
| 20<br>21<br>22<br>23<br>24<br>25<br>26<br>27<br>28<br>29<br>30<br>31<br>32                            | 9. Voos and Park. (2014), USA         | Not stated / 62 | Not stated / level III             | Non-randomised, Convenience sampling.<br><br><i>Unit level effect:</i> Two different time periods                                       | <b>Intervention: OU (Open Unit) policy.</b><br><br>Parents were allowed access to their baby 24 hours a day, 7 days a week.<br><br><b>Control:</b> Parents pre-OU implementation received routine care. The unit was closed to parents during nurse change of shift in mornings and evenings.                                                                                                | <b>Parent satisfaction with how much time parents get to spend with their baby</b> | After babies were discharged (once)<br><br>- After pre-OU parents were discharged<br><br>- After post-OU parents were discharged                                                                          | <i>Single question (From a validated questionnaire)</i><br><br>The question "Did you get to spend as much time as you wanted with your baby?" was used from the NRC (National Research Corporation) Picker parent survey.<br><br>1 question ("yes or no")                                                                                            | <b>Small numbers. No data indicating statistical analysis conducted or evidence of statistically significant results.</b><br><br>"Did you get to spend as much time as you wanted with your baby?" Yes.<br><br>Pre OU 78% (18/23)<br>Post OU 92% (36/39)                                                                                                                                                                                                                                                                                                                                            | <b>Yes.</b><br><br>The NICU has a Family-centered care committee including parents, which conducted this project.                                                                                           | <b>3</b> |
| 33<br>34<br>35<br>36<br>37<br>38<br>39<br>40<br>41<br>42<br>43<br>44<br>45<br>46                      | 10. Segre et al. (2013), USA          | Mothers /23     | Mean (SD) 31.57 (5.30) / level III | For the outcome of parent satisfaction:<br><br>Non-Randomised, Convenience sampling.<br><br><i>Group level effect:</i><br>Intervention/ | <b>Intervention: (LV) Listening visits.</b><br><br>Mothers met with the LV provider for up to six 50-min LV sessions, conducted in a private hospital, every 2-3 days, within 1-month. Visits entailed greeting, debriefing, updating on current issues, working an agenda through listening and problem solving, and providing closure through                                              | <b>Satisfaction with the treatment and the outcome.</b>                            | During babies' admission (once)<br><br>- Not stated exactly when<br><br>No pre-intervention parent satisfaction data available for comparison.                                                            | <i>Satisfaction questionnaire</i><br><br>The Client Satisfaction Questionnaire was used.<br><br><b>Validation:</b> Partially reported. Authors stated reliability testing took place; no information on content validity provided.<br><br>8 questions.<br><br><b>Format of questions:</b> not stated                                                 | <b>Only the intervention group was assessed and only post-intervention.</b><br><br>The authors reported:<br><br>"The majority of women who received LVs were highly satisfied with the intervention".<br><br>"The average score for the Client Satisfaction Questionnaire was 29.91, comparable to levels of satisfaction reported by clients receiving depression treatment from a mental health professional."                                                                                                                                                                                    | <b>No</b>                                                                                                                                                                                                   | <b>4</b> |

|                                |                                                                                               |                                                                                  |                                                                                                                                        |                                                                                                                                                                                                                                                                                                                                                                                                                                                                                                                                                        |                                                                                                                                                                             |                                                                                                                                                                                                                                                     |                                                                                                                                                                                                                                                                                                                                                                                                                                                                                                                                                         |                                                                                                                                                                                                                                                                                                                                                                                                      |     |   |
|--------------------------------|-----------------------------------------------------------------------------------------------|----------------------------------------------------------------------------------|----------------------------------------------------------------------------------------------------------------------------------------|--------------------------------------------------------------------------------------------------------------------------------------------------------------------------------------------------------------------------------------------------------------------------------------------------------------------------------------------------------------------------------------------------------------------------------------------------------------------------------------------------------------------------------------------------------|-----------------------------------------------------------------------------------------------------------------------------------------------------------------------------|-----------------------------------------------------------------------------------------------------------------------------------------------------------------------------------------------------------------------------------------------------|---------------------------------------------------------------------------------------------------------------------------------------------------------------------------------------------------------------------------------------------------------------------------------------------------------------------------------------------------------------------------------------------------------------------------------------------------------------------------------------------------------------------------------------------------------|------------------------------------------------------------------------------------------------------------------------------------------------------------------------------------------------------------------------------------------------------------------------------------------------------------------------------------------------------------------------------------------------------|-----|---|
|                                |                                                                                               |                                                                                  | control groups                                                                                                                         | summary.                                                                                                                                                                                                                                                                                                                                                                                                                                                                                                                                               |                                                                                                                                                                             |                                                                                                                                                                                                                                                     |                                                                                                                                                                                                                                                                                                                                                                                                                                                                                                                                                         | "91.3% of our participants rated the quality of help they received as excellent."                                                                                                                                                                                                                                                                                                                    |     |   |
|                                |                                                                                               |                                                                                  | Post-intervention group testing only                                                                                                   | <u>Control:</u> Women who did not meet the specific criteria (e.g. minimum score on depression scale) were not invited to join the treatment trial and received routine NICU care/support instead.                                                                                                                                                                                                                                                                                                                                                     |                                                                                                                                                                             |                                                                                                                                                                                                                                                     |                                                                                                                                                                                                                                                                                                                                                                                                                                                                                                                                                         |                                                                                                                                                                                                                                                                                                                                                                                                      |     |   |
| 11. Palma et al. (2012), USA   | Not stated / 26 families returned the survey containing the satisf. measure)                  | Not stated / level II                                                            | Non-randomised, Convenience sampling.<br><br><i>Unit level effect:</i><br>Two different time periods                                   | <u>Intervention:</u> <b>YBDU (Your Baby's Daily Update). A daily parent update letter generated from the Electronic Medical Record (EMR).</b><br><br>Parents were given daily YBDU reports, printed automatically from the EMR. The YBDU included information about an infant's status during the past 24 hours and a hand-written update by the infant's care provider.<br><br><u>Control:</u> Parents received routine care and usual verbal updates (6 months pre- adoption of YBDU).                                                               | <b>Satisfaction with YBDU</b>                                                                                                                                               | During babies' admission (once)<br><br>- Not stated exactly when<br><br>No pre-intervention parent satisfaction data available for comparison (different parent groups pre and post intervention).                                                  | <i>Satisfaction questionnaire</i><br><br>A questionnaire including items regarding adoption of and satisfaction with YBDU was used.<br><br><u>Validation:</u> No content validity or reliability testing reported.<br><br><u>Number and format of questions:</u> not stated.                                                                                                                                                                                                                                                                            | <b>Only the intervention group was assessed and only post-intervention.</b><br><br>The authors reported: "When asked to rate the statement "I like receiving Your Baby's Daily Update", 96% of families who used YBDU as an information source responded with the highest rating, "always"."                                                                                                         | No  | 4 |
| 12. Stevens et al. (2011), USA | Mothers /147. For the OPBY NICU, 58 surveys were returned. For the SFR NICU, 89 were returned | Mean (SD)<br><br>Control: 35 (4)<br><br>Interv: 34 (3)<br><br>/ level not stated | Cohort trial. This research was part of a large prospective evaluation.<br><br><i>Unit level effect:</i><br>Two different time periods | <u>Intervention:</u> <b>SFR (Single-family room) NICU for neonatal care.</b><br><br>Parents could visit their baby, room-in, do kangaroo care and breastfeed at any time, in individual rooms (containing bed, desk, closet, telephone, chair, refrigerator for breast-milk storage).<br><br><u>Control:</u> OPBY (Open-bay) NICU. The traditional open-bay NICU was typical of facilities built before 1980. All neonates, family members, staff, monitors, and equipment were visible for all neonates in each room. Portable partitions were placed | <b>Parent satisfaction with different elements of NICU:</b><br>- Delivery<br>- Environment<br>- Nurses<br>- Physicians<br>- Discharge<br>- Personal<br>- Overall Assessment | After babies were discharged (once)<br><br>- Mailed within 60 days of discharge of parents' infants from the NICU<br><br>No pre-intervention parent satisfaction data available for comparison (different parent groups pre and post intervention). | <i>Satisfaction questionnaire</i><br><br>A questionnaire from Press Ganey Associates was used. Also included were three questions added by the investigators.<br><br><u>Validation:</u> Partially reported. The original questionnaire was validated questionnaire but no content validity or reliability testing was reported regarding the 3 questions added by the study team.<br><br>42 questions in total (7 categories):<br>Delivery, Environment, Nurses, Physicians, Discharge, Personal, Overall Assessment.<br><br>Likert (1 very poor-5 very | <b>Statistically significant improvement was found for the survey categories of Environment, Overall and the Total survey.</b><br><br>Estimated numbers from report's figures as numbers not provided):<br><br><b>Median SFR OPBY p-value</b><br>Environment 4.7 3.7 <0.001<br>Overall 5 4.8 0.018<br>Total 4.7 4.5 0.045<br><br>16 items composite score for family-centered care:<br>4.4 4.0 0.017 | Yes | 1 |

|                                                                                                                   |                                     |                                               |                                                                                                 |                                                                                                      |                                                                                                                                                                                                                                                                                                                                                                                                                                                                                                                      |                                                                                |                                                                                             |                                                                                                                                                                                                                                                                                                                                                           |                                                                                                                                                                                                                                                                                                                                                                                                                                                                                |                                                                                                                                                            |          |
|-------------------------------------------------------------------------------------------------------------------|-------------------------------------|-----------------------------------------------|-------------------------------------------------------------------------------------------------|------------------------------------------------------------------------------------------------------|----------------------------------------------------------------------------------------------------------------------------------------------------------------------------------------------------------------------------------------------------------------------------------------------------------------------------------------------------------------------------------------------------------------------------------------------------------------------------------------------------------------------|--------------------------------------------------------------------------------|---------------------------------------------------------------------------------------------|-----------------------------------------------------------------------------------------------------------------------------------------------------------------------------------------------------------------------------------------------------------------------------------------------------------------------------------------------------------|--------------------------------------------------------------------------------------------------------------------------------------------------------------------------------------------------------------------------------------------------------------------------------------------------------------------------------------------------------------------------------------------------------------------------------------------------------------------------------|------------------------------------------------------------------------------------------------------------------------------------------------------------|----------|
|                                                                                                                   |                                     |                                               |                                                                                                 | around the incubator for breastfeeding and kangaroo care.                                            |                                                                                                                                                                                                                                                                                                                                                                                                                                                                                                                      |                                                                                | good).                                                                                      |                                                                                                                                                                                                                                                                                                                                                           |                                                                                                                                                                                                                                                                                                                                                                                                                                                                                |                                                                                                                                                            |          |
| 1<br>2<br>3<br>4<br>5<br>6<br>7<br>8<br>9<br>10<br>11<br>12<br>13<br>14<br>15<br>16<br>17<br>18<br>19<br>20<br>21 | 13. Voos et al. (2011), USA         | Not stated /28                                | Not stated / level not stated                                                                   | Non-randomised, Convenience sampling.<br><br><i>Unit level effect:</i><br>Two different time periods | <b>Intervention: Family-centered rounds (FCRs).</b><br><br>Parents were invited to attend rounds and choose their level of involvement (attend every day/not at all/periodically). For confidentiality concerns, parents were asked to step outside while rounds of others' infants took place. The staff augmented FCRs by meeting with parents again after rounds if needed.<br><br><b>Control:</b> Parents received routine care. Prior to FCR implementation parents were asked to leave the unit during rounds. | <b>Global satisfaction with the NICU experience</b>                            | During babies' admission (twice)<br><br>- Prior to FCR<br><br>- 6 months after starting FCR | <i>Satisfaction questionnaire (Validated)</i><br><br><i>The NIPS questionnaire.</i><br><br>24 questions: looking at satisfaction in different areas of the NICU (medical caregivers, communication, tests, and procedures).<br><br>Likert scale (1-7 points).                                                                                             | <b>A subset of NIPS items related to communication (i.e. being kept informed as to changes in the infant's condition, meeting with physicians, and information about long-term expectations) yielded a significant increase from pre to post FCR scores.</b><br><br><b>post-FCR pre-FCR p-value</b><br>NIPS 5.5 4.4 <0.01<br><b>score</b><br><br>The average score on the NIPS did not change significantly.                                                                   | <b>No</b>                                                                                                                                                  | <b>1</b> |
| 22<br>23<br>24<br>25<br>26<br>27<br>28<br>29<br>30<br>31<br>32<br>33<br>34<br>35<br>36<br>37<br>38<br>39<br>40    | 14. Weiss et al. (2010), USA        | Mothers /84                                   | Mean (SD)<br><br>Pre-interv group: 32 (4.4)<br><br>Post-interv group: 32 (9)<br><br>/ level III | Non-randomised, Convenience sampling<br><br><i>Unit level effect:</i><br>Two different time periods  | <b>Intervention:</b><br><b>An intervention to increase PMP (Principal Medical Providers) availability and communication frequency.</b><br><br>(1) A brief education module for PMPs was introduced (2) parents received a contact card with PMP names, job descriptions and contact information (3) a poster of the faces, names and titles of the PMPs was placed at NICU entrance.<br><br><b>Control:</b> Parents received routine care in the pre-intervention cohort, without the above.                         | <b>Parent satisfaction with physician and nurse practitioner communication</b> | During babies' admission (twice)<br><br>- Pre-intervention<br><br>- Post-intervention       | <i>Satisfaction Questionnaire (Validated)</i><br><br>A pilot survey written by Press Ganey and the Picker Institute was used and revised based on parent responses.<br><br>6 open-ended questions (Quantity of communication)<br><br>6 Likert scale questions (range questions (Availability, understanding, reciprocity, empathy, overall satisfaction)) | <b>Overall satisfaction, based on the ordinal analysis of the five-point Likert scale, was significantly higher after the intervention (P&lt;0.01).</b><br><br><b>Overall satisfaction, dichotomised into a satisfied subgroup and a dissatisfied subgroup for each cohort, was also significantly increased after the intervention.</b><br><br><b>post -interv pre-interv</b><br>Very 97%(32/33)74%(37/50)<br>satisfied/<br>Somewhat satisfied<br><br><b>p-value &lt;0.01</b> | <b>No</b><br><br>Authors stated that only after trialing the intervention on many parents (both satisfied and unsatisfied) gave suggestions to improve it. | <b>1</b> |
| 41<br>42<br>43<br>44<br>45<br>46                                                                                  | 15. Foster et al. (2008), Australia | Mothers and fathers /93<br><br>5 Special Care | Mean (SD)<br><br>Headbox: 36.5 (2.6)                                                            | Non-randomised, Convenience sampling<br><br><i>Group level</i>                                       | <b>Intervention 1: Infants received headbox oxygen treatment for respiratory distress.</b><br><br><b>Intervention 2: Infants</b>                                                                                                                                                                                                                                                                                                                                                                                     | <b>Satisfaction with treatment (i.e. headbox oxygen or CPAP)</b>               | During babies' admission (once)<br><br>- Within 5 days of the babies' admission             | <i>Single question</i><br><br><b>Validation:</b> No content validity or reliability testing reported.                                                                                                                                                                                                                                                     | <b>Parents with babies receiving CPAP rated their satisfaction with the baby's treatment statistically significantly higher than the headbox</b>                                                                                                                                                                                                                                                                                                                               | <b>No</b>                                                                                                                                                  | <b>1</b> |

|                                                                                                                                              |                              |                                                                                                                                                      |                                                                                                                                                                                             |                                                                                                                                                                                                                                                                                                                                                                                                                                                                                                                                                                                  |                                                                                                                                                                                                                                                                                                                                                           |                                                                                                                                                    |                                                                                                                                                                                                                                                                                                                                                  |                                                                                                                                                                                                                                                                                                                                                                                                                                                                                                                                                                                                                                                                                                                    |    |   |
|----------------------------------------------------------------------------------------------------------------------------------------------|------------------------------|------------------------------------------------------------------------------------------------------------------------------------------------------|---------------------------------------------------------------------------------------------------------------------------------------------------------------------------------------------|----------------------------------------------------------------------------------------------------------------------------------------------------------------------------------------------------------------------------------------------------------------------------------------------------------------------------------------------------------------------------------------------------------------------------------------------------------------------------------------------------------------------------------------------------------------------------------|-----------------------------------------------------------------------------------------------------------------------------------------------------------------------------------------------------------------------------------------------------------------------------------------------------------------------------------------------------------|----------------------------------------------------------------------------------------------------------------------------------------------------|--------------------------------------------------------------------------------------------------------------------------------------------------------------------------------------------------------------------------------------------------------------------------------------------------------------------------------------------------|--------------------------------------------------------------------------------------------------------------------------------------------------------------------------------------------------------------------------------------------------------------------------------------------------------------------------------------------------------------------------------------------------------------------------------------------------------------------------------------------------------------------------------------------------------------------------------------------------------------------------------------------------------------------------------------------------------------------|----|---|
| 1<br>2<br>3<br>4<br>5<br>6<br>7                                                                                                              | Nurseries                    | CPAP:<br>36 (3)<br><br>/level I                                                                                                                      | <i>effect:</i><br>Intervention<br>1/ intervention<br>2 groups<br><br>Post<br>intervention<br>testing only                                                                                   | <b>received continuous oxygen positive airway pressure (CPAP) treatment for respiratory distress.</b>                                                                                                                                                                                                                                                                                                                                                                                                                                                                            |                                                                                                                                                                                                                                                                                                                                                           | No pre-intervention parent satisfaction data available for comparison.                                                                             | 1 likert scale question (1 not at all satisfied-5 extremely satisfied).                                                                                                                                                                                                                                                                          | <b>group mean rating.</b><br><b>Headbox CPAP</b><br><b>Mean</b> 3.71 (1.31) 4.51 (0.79)<br><b>(SD)</b><br><b>p-value</b> 0.001<br><br>The CPAP group averaged between <i>very and extremely satisfied</i> compared with parents of babies receiving headbox, who averaged between <i>satisfied and very satisfied</i> ratings.                                                                                                                                                                                                                                                                                                                                                                                     |    |   |
| 8<br>9<br>10<br>11<br>12<br>13<br>14<br>15<br>16<br>17<br>18<br>19<br>20<br>21<br>22                                                         | 16. Byers et al. (2006), USA | Only mothers reported /35<br><br>Preterm infants<br><br>Mean (SD)<br><br>Control:<br>28.9 (3.44)<br><br>Interv:<br>28.6 (3.37)<br><br>/ level II/III | For the outcome of parent satisfaction:<br><br>Non-randomised, Convenience sampling<br><br><i>Group level effect:</i><br>Intervention/ control groups<br><br>Post-intervention testing only | <b>Intervention: Infants received individualised, developmentally supportive family-centered care.</b><br><br>Infants received care within the framework and philosophy of individualised, developmentally supportive family-centered interventions.<br><br><b>Control:</b> Infants received the traditional NICU standard of care.                                                                                                                                                                                                                                              | <b>Parent satisfaction relating to:</b><br>- <i>parental perceptions of staff caring received</i><br>- <i>preparation for the parental role</i><br>- <i>overall satisfaction with the NICU experience</i>                                                                                                                                                 | During babies' admission (once)<br><br>- On the day before discharge<br><br>No pre-intervention parent satisfaction data available for comparison. | <i>Satisfaction questionnaire</i><br><br>The NICU's parental satisfaction tool was used.<br><br><b>Validation:</b> Partially reported. Authors stated content validity testing took place, but "because of the disparate nature of the items, survey reliability was not assessed".<br><br>11 questions<br><br>Likert scale (1-5 strongly agree) | <b>Independent t-test analysis of parent satisfaction/perception scores showed no significant difference between groups.</b><br><br>Example statement: "I was satisfied with the car my baby and I received in the NICU"<br><br><b>Interv Control</b><br><b>Mean</b> 4.94(0.23) 4.71(0.47)<br><b>(SD)</b><br><b>p-value</b> 0.064<br><br>Both groups reported very high satisfaction with their NICU experience (4.4-5.0)                                                                                                                                                                                                                                                                                          | No | 2 |
| 23<br>24<br>25<br>26<br>27<br>28<br>29<br>30<br>31<br>32<br>33<br>34<br>35<br>36<br>37<br>38<br>39<br>40<br>41<br>42<br>43<br>44<br>45<br>46 | 17. Mills et al. (2006), USA | Not stated/<br>not stated<br><br>Parents of infants from 6 hospitals                                                                                 | Implementatio n project<br><br>Plan Do Study Act (PDSA) quality improvement testing                                                                                                         | <b>Intervention: 5 potentially better practices (PBPs) in the area of discharge planning.</b><br><br>The project team iteratively implemented 5 PBPs:<br>1. Created an easy-to-use, easy-to-access discharge planning tool kit.<br>2. Restructured communication tools and processes to reflect a "plan for the day, the stay, and the way" to discharge.<br>3. Maximised the impact and use of caregiver educational tools, and updated materials and delivery systems for caregiver education.<br>4. Used various continuous quality improvement tools and processes to ensure | <b>General satisfaction</b><br>- <i>with care</i><br>- <i>parents' feelings about preparedness for discharge</i><br>- <i>ability and confidence in feeding</i><br>- <i>familiarity with their infant</i><br>- <i>feeling like a parent</i><br>- <i>participation in care</i><br>- <i>adequacy of information from staff about medical and care issues</i> | During babies' admission (4 times)<br><br>- Not reported exactly when                                                                              | <i>Satisfaction questionnaire</i><br><br>The Internet-based parent satisfaction survey "howsyourbaby.com" that was developed especially for this NICU population was used.<br><br><b>Validation:</b> No content validity or reliability testing reported.<br><br><b>Number and format of questions:</b> not stated.                              | Through multiple rapid-cycle projects, the project's collaborative group made changes within the 5 PBP plans.<br><br><b>Parent satisfaction measures were used to longitudinally monitor the changes made, rather than make direct group comparison. No data indicating statistical analysis conducted or evidence of statistically significant results.</b><br><br>Parent satisfaction survey results (all centers combined) were high across 4 measurement quartiles. No specific interquartile analysis was reported.<br><br>Parent readiness for discharge was high at the beginning and throughout the collaborative. Parents' receiving "just the right amount of information" regarding car seat trials and | No | 3 |

|                                             |                                                                                                                 |                                                                                               |                                                                                                                                                                                                      | parent/caregiver and staff satisfaction.<br>5. Analysed and enhanced interactions with and transfers into the community.<br><br><u>Control:</u> N/A. No discrete control group. PDSA quality improvement methodology was applied to parent participants.                                                                                                                                                                                                                                                                                                                         |                                                                                                                                                                                                                                      |                                                                                                                                              |                                                                                                                                                                                                                                                                                                                                                                     | safe sleep demonstrated some variability throughout the collaborative.                                                                                                                                                                                                                                                                                                                                                                                                                                                                                                                                                                                                                                                                                                                                                                                        |  |        |         |           |                           |               |       |        |                                |        |        |       |         |       |  |    |   |
|---------------------------------------------|-----------------------------------------------------------------------------------------------------------------|-----------------------------------------------------------------------------------------------|------------------------------------------------------------------------------------------------------------------------------------------------------------------------------------------------------|----------------------------------------------------------------------------------------------------------------------------------------------------------------------------------------------------------------------------------------------------------------------------------------------------------------------------------------------------------------------------------------------------------------------------------------------------------------------------------------------------------------------------------------------------------------------------------|--------------------------------------------------------------------------------------------------------------------------------------------------------------------------------------------------------------------------------------|----------------------------------------------------------------------------------------------------------------------------------------------|---------------------------------------------------------------------------------------------------------------------------------------------------------------------------------------------------------------------------------------------------------------------------------------------------------------------------------------------------------------------|---------------------------------------------------------------------------------------------------------------------------------------------------------------------------------------------------------------------------------------------------------------------------------------------------------------------------------------------------------------------------------------------------------------------------------------------------------------------------------------------------------------------------------------------------------------------------------------------------------------------------------------------------------------------------------------------------------------------------------------------------------------------------------------------------------------------------------------------------------------|--|--------|---------|-----------|---------------------------|---------------|-------|--------|--------------------------------|--------|--------|-------|---------|-------|--|----|---|
| 18. Wielenga et al. (2006), The Netherlands | Mothers and fathers / 46                                                                                        | Mean (SD)<br><br>Control: 28.5 (26.0-29.9)<br><br>Interv: 28.3 (25.6-29.9)<br><br>/ level III | Non-randomised, Convenience sampling<br><br><i>Unit level effect:</i><br>Two different time periods                                                                                                  | <u>Intervention:</u> <b>The Newborn Individualised Developmental Care and Assessment Program (NIDCAP).</b><br><br>Infants received care according to NIDCAP principles and parents were taught how to provide it. Caregiving plans were designed based on the infant's current developmental stage, medical condition and family needs. Caregivers learnt to watch sensitively and note the infant's reactions to different types of handling and care, making continuous adjustments.<br><br><u>Control:</u> Infants received traditional neonatal care practiced at that time. | <b>Parent satisfaction relating to:</b><br>-Overall rating<br>-Care of the baby<br>-Communication with staff<br>-Involvement in care<br>-Being prepared<br>-Being a parent<br>-Being near your baby<br>-Total score                  | After babies were discharged (on day of discharge/ transfer)<br><br>- Pre NIDCAP cohort<br><br>- Post NIDCAP cohort                          | <i>Satisfaction questionnaire (Validated)</i><br><br>The NICU-PSF was used and translated from English to Dutch.<br><br>62 questions<br><br>Closed and open-ended questions.<br><br>Different rating scales used (5-point rating scale from "extremely satisfied" to "not at all satisfied" or "excellent" to "poor").<br><br>Total score range (50-243 points)     | <b>The intervention group's mean total score was significantly higher than the control.</b><br><br><table border="1"><thead><tr><th></th><th>Interv</th><th>Control</th></tr></thead><tbody><tr><td>Mean (SD)</td><td>185.67(17.74)</td><td>174.04(20.98)</td></tr></tbody></table><br><b>p-value 0.041</b><br><br>Almost all separate concepts showed an increase in their mean scores. The concept of "being a parent" had a slightly lower mean score (9.39, SD = 1.73) in the intervention group than in the control group (9.78, SD = 2.09).<br><br><b>The concept of "preparedness" showed statistically significant difference:</b><br><br><table border="1"><thead><tr><th></th><th>Interv</th><th>Control</th></tr></thead><tbody><tr><td>Mean</td><td>16.38</td><td>13.83</td></tr><tr><td>p-value</td><td>0.038</td><td></td></tr></tbody></table> |  | Interv | Control | Mean (SD) | 185.67(17.74)             | 174.04(20.98) |       | Interv | Control                        | Mean   | 16.38  | 13.83 | p-value | 0.038 |  | No | 1 |
|                                             | Interv                                                                                                          | Control                                                                                       |                                                                                                                                                                                                      |                                                                                                                                                                                                                                                                                                                                                                                                                                                                                                                                                                                  |                                                                                                                                                                                                                                      |                                                                                                                                              |                                                                                                                                                                                                                                                                                                                                                                     |                                                                                                                                                                                                                                                                                                                                                                                                                                                                                                                                                                                                                                                                                                                                                                                                                                                               |  |        |         |           |                           |               |       |        |                                |        |        |       |         |       |  |    |   |
| Mean (SD)                                   | 185.67(17.74)                                                                                                   | 174.04(20.98)                                                                                 |                                                                                                                                                                                                      |                                                                                                                                                                                                                                                                                                                                                                                                                                                                                                                                                                                  |                                                                                                                                                                                                                                      |                                                                                                                                              |                                                                                                                                                                                                                                                                                                                                                                     |                                                                                                                                                                                                                                                                                                                                                                                                                                                                                                                                                                                                                                                                                                                                                                                                                                                               |  |        |         |           |                           |               |       |        |                                |        |        |       |         |       |  |    |   |
|                                             | Interv                                                                                                          | Control                                                                                       |                                                                                                                                                                                                      |                                                                                                                                                                                                                                                                                                                                                                                                                                                                                                                                                                                  |                                                                                                                                                                                                                                      |                                                                                                                                              |                                                                                                                                                                                                                                                                                                                                                                     |                                                                                                                                                                                                                                                                                                                                                                                                                                                                                                                                                                                                                                                                                                                                                                                                                                                               |  |        |         |           |                           |               |       |        |                                |        |        |       |         |       |  |    |   |
| Mean                                        | 16.38                                                                                                           | 13.83                                                                                         |                                                                                                                                                                                                      |                                                                                                                                                                                                                                                                                                                                                                                                                                                                                                                                                                                  |                                                                                                                                                                                                                                      |                                                                                                                                              |                                                                                                                                                                                                                                                                                                                                                                     |                                                                                                                                                                                                                                                                                                                                                                                                                                                                                                                                                                                                                                                                                                                                                                                                                                                               |  |        |         |           |                           |               |       |        |                                |        |        |       |         |       |  |    |   |
| p-value                                     | 0.038                                                                                                           |                                                                                               |                                                                                                                                                                                                      |                                                                                                                                                                                                                                                                                                                                                                                                                                                                                                                                                                                  |                                                                                                                                                                                                                                      |                                                                                                                                              |                                                                                                                                                                                                                                                                                                                                                                     |                                                                                                                                                                                                                                                                                                                                                                                                                                                                                                                                                                                                                                                                                                                                                                                                                                                               |  |        |         |           |                           |               |       |        |                                |        |        |       |         |       |  |    |   |
| 19. Penticuff and Arheart. (2005), USA      | Dyads (both parents or mother with her support person)/ 122 mothers<br><br>Results based only on mothers' data. | Not stated / Level III                                                                        | A repeated measures design<br><br>- First 2 years (control group data collection)<br><br>- Year 3 (staff training)<br><br>- Year 4 (implementing the intervention)<br><br>- Year 5 (collecting data) | <u>Intervention:</u> <b>The Newborn Individualised IPC- CPM intervention (Infant Progress Chart) - (Care Planning Meetings).</b><br><br>Both the mother and father (or the mother and her designated support person) were shown how to use the Infant Progress Chart and attended 3 Care Planning Meetings (with neonatologists/Neonatal Nurse Practitioners).                                                                                                                                                                                                                   | <b>Satisfaction with participation in decision making was measured by 5 collaboration indices:</b><br><br>Satisfaction with<br>(1) Care<br>(2) Relationships with professionals<br>(3) Decision input<br>(4) The process of decision | During babies' admission (three times)<br><br>- Within 0-3 days<br><br>- 9- 12 days<br><br>- 25-28 days of an infant's admission to the NICU | <i>Three satisfaction questionnaires</i><br><br>1. Two subscales of the investigator-designed "Parents' Understanding of Infant Care and Outcomes Questionnaire" were used to measure Satisfaction with Care (1).<br><br><u>Validation:</u> Partially reported. Authors stated content validity testing took place; no information on reliability testing provided. | <b>The intervention group was more satisfied with the amount of decision input they had (3) and with the process by which medical decisions were made (4).</b><br><br><table border="1"><thead><tr><th></th><th>Interv</th><th>Control</th><th>p-value</th></tr></thead><tbody><tr><td>Decision input amount (3)</td><td>33.44</td><td>30.05</td><td>0.058</td></tr><tr><td>Process of decision making (4)</td><td>120.20</td><td>104.95</td><td>0.012</td></tr></tbody></table><br>There were no statistically significant differences between control and intervention groups in satisfaction with their infants' care (1), with relationships with                                                                                                                                                                                                         |  | Interv | Control | p-value   | Decision input amount (3) | 33.44         | 30.05 | 0.058  | Process of decision making (4) | 120.20 | 104.95 | 0.012 | No      | 1     |  |    |   |
|                                             | Interv                                                                                                          | Control                                                                                       | p-value                                                                                                                                                                                              |                                                                                                                                                                                                                                                                                                                                                                                                                                                                                                                                                                                  |                                                                                                                                                                                                                                      |                                                                                                                                              |                                                                                                                                                                                                                                                                                                                                                                     |                                                                                                                                                                                                                                                                                                                                                                                                                                                                                                                                                                                                                                                                                                                                                                                                                                                               |  |        |         |           |                           |               |       |        |                                |        |        |       |         |       |  |    |   |
| Decision input amount (3)                   | 33.44                                                                                                           | 30.05                                                                                         | 0.058                                                                                                                                                                                                |                                                                                                                                                                                                                                                                                                                                                                                                                                                                                                                                                                                  |                                                                                                                                                                                                                                      |                                                                                                                                              |                                                                                                                                                                                                                                                                                                                                                                     |                                                                                                                                                                                                                                                                                                                                                                                                                                                                                                                                                                                                                                                                                                                                                                                                                                                               |  |        |         |           |                           |               |       |        |                                |        |        |       |         |       |  |    |   |
| Process of decision making (4)              | 120.20                                                                                                          | 104.95                                                                                        | 0.012                                                                                                                                                                                                |                                                                                                                                                                                                                                                                                                                                                                                                                                                                                                                                                                                  |                                                                                                                                                                                                                                      |                                                                                                                                              |                                                                                                                                                                                                                                                                                                                                                                     |                                                                                                                                                                                                                                                                                                                                                                                                                                                                                                                                                                                                                                                                                                                                                                                                                                                               |  |        |         |           |                           |               |       |        |                                |        |        |       |         |       |  |    |   |

|    |                              |             |                                                                                      |                                                                                                                                                                                             |                                                                                                                                                                                                                                                                                                                                                               |                                                                                                                                                                                                                                                                                                              |                                                                                                                                                                                                    |                                                                                                                                                                                                                                                                                                                                                        |                                                                                                                                                                                                                                                                                                                                                                                                                                                                                                |    |   |  |
|----|------------------------------|-------------|--------------------------------------------------------------------------------------|---------------------------------------------------------------------------------------------------------------------------------------------------------------------------------------------|---------------------------------------------------------------------------------------------------------------------------------------------------------------------------------------------------------------------------------------------------------------------------------------------------------------------------------------------------------------|--------------------------------------------------------------------------------------------------------------------------------------------------------------------------------------------------------------------------------------------------------------------------------------------------------------|----------------------------------------------------------------------------------------------------------------------------------------------------------------------------------------------------|--------------------------------------------------------------------------------------------------------------------------------------------------------------------------------------------------------------------------------------------------------------------------------------------------------------------------------------------------------|------------------------------------------------------------------------------------------------------------------------------------------------------------------------------------------------------------------------------------------------------------------------------------------------------------------------------------------------------------------------------------------------------------------------------------------------------------------------------------------------|----|---|--|
| 1  |                              |             | from the intervention group)                                                         | <u>Control:</u> During the control phase, professionals carried out usual communication and interaction with control group parents.                                                         | making (5) Decisions made                                                                                                                                                                                                                                                                                                                                     |                                                                                                                                                                                                                                                                                                              | 30 questions.<br>Five-point Likert scale.                                                                                                                                                          | NICU professionals (2) and with the decisions made for infant treatment (5).                                                                                                                                                                                                                                                                           |                                                                                                                                                                                                                                                                                                                                                                                                                                                                                                |    |   |  |
| 2  |                              |             | <i>Unit level effect:</i> Two different time periods                                 |                                                                                                                                                                                             |                                                                                                                                                                                                                                                                                                                                                               |                                                                                                                                                                                                                                                                                                              | 2. A subscale of the investigator-designed "Relationships with Professional and Decision Input Questionnaire" was used to measure Satisfaction with relationships (2).                             |                                                                                                                                                                                                                                                                                                                                                        |                                                                                                                                                                                                                                                                                                                                                                                                                                                                                                |    |   |  |
| 3  |                              |             |                                                                                      |                                                                                                                                                                                             |                                                                                                                                                                                                                                                                                                                                                               |                                                                                                                                                                                                                                                                                                              | <u>Validation:</u> Partially reported. Authors stated content validity testing took place; no information on reliability testing provided.                                                         |                                                                                                                                                                                                                                                                                                                                                        |                                                                                                                                                                                                                                                                                                                                                                                                                                                                                                |    |   |  |
| 4  |                              |             |                                                                                      |                                                                                                                                                                                             |                                                                                                                                                                                                                                                                                                                                                               |                                                                                                                                                                                                                                                                                                              | 12 questions.                                                                                                                                                                                      |                                                                                                                                                                                                                                                                                                                                                        |                                                                                                                                                                                                                                                                                                                                                                                                                                                                                                |    |   |  |
| 5  |                              |             |                                                                                      |                                                                                                                                                                                             |                                                                                                                                                                                                                                                                                                                                                               |                                                                                                                                                                                                                                                                                                              | Five-point Likert scale                                                                                                                                                                            |                                                                                                                                                                                                                                                                                                                                                        |                                                                                                                                                                                                                                                                                                                                                                                                                                                                                                |    |   |  |
| 6  |                              |             |                                                                                      |                                                                                                                                                                                             |                                                                                                                                                                                                                                                                                                                                                               |                                                                                                                                                                                                                                                                                                              | 3. <u>Validated.</u>                                                                                                                                                                               |                                                                                                                                                                                                                                                                                                                                                        |                                                                                                                                                                                                                                                                                                                                                                                                                                                                                                |    |   |  |
| 7  |                              |             |                                                                                      |                                                                                                                                                                                             |                                                                                                                                                                                                                                                                                                                                                               |                                                                                                                                                                                                                                                                                                              | The "Collaboration and Satisfaction About Care Questionnaire" developed by Baggs, was used to measure Satisfaction with decision input (3), with decision process (4) and with decisions made (5). |                                                                                                                                                                                                                                                                                                                                                        |                                                                                                                                                                                                                                                                                                                                                                                                                                                                                                |    |   |  |
| 8  |                              |             |                                                                                      |                                                                                                                                                                                             |                                                                                                                                                                                                                                                                                                                                                               |                                                                                                                                                                                                                                                                                                              |                                                                                                                                                                                                    |                                                                                                                                                                                                                                                                                                                                                        |                                                                                                                                                                                                                                                                                                                                                                                                                                                                                                |    |   |  |
| 9  |                              |             |                                                                                      |                                                                                                                                                                                             |                                                                                                                                                                                                                                                                                                                                                               |                                                                                                                                                                                                                                                                                                              |                                                                                                                                                                                                    |                                                                                                                                                                                                                                                                                                                                                        |                                                                                                                                                                                                                                                                                                                                                                                                                                                                                                |    |   |  |
| 10 |                              |             |                                                                                      |                                                                                                                                                                                             |                                                                                                                                                                                                                                                                                                                                                               |                                                                                                                                                                                                                                                                                                              |                                                                                                                                                                                                    |                                                                                                                                                                                                                                                                                                                                                        |                                                                                                                                                                                                                                                                                                                                                                                                                                                                                                |    |   |  |
| 11 |                              |             |                                                                                      |                                                                                                                                                                                             |                                                                                                                                                                                                                                                                                                                                                               |                                                                                                                                                                                                                                                                                                              |                                                                                                                                                                                                    |                                                                                                                                                                                                                                                                                                                                                        |                                                                                                                                                                                                                                                                                                                                                                                                                                                                                                |    |   |  |
| 12 |                              |             |                                                                                      |                                                                                                                                                                                             |                                                                                                                                                                                                                                                                                                                                                               |                                                                                                                                                                                                                                                                                                              |                                                                                                                                                                                                    |                                                                                                                                                                                                                                                                                                                                                        |                                                                                                                                                                                                                                                                                                                                                                                                                                                                                                |    |   |  |
| 13 |                              |             |                                                                                      |                                                                                                                                                                                             |                                                                                                                                                                                                                                                                                                                                                               |                                                                                                                                                                                                                                                                                                              |                                                                                                                                                                                                    |                                                                                                                                                                                                                                                                                                                                                        |                                                                                                                                                                                                                                                                                                                                                                                                                                                                                                |    |   |  |
| 14 |                              |             |                                                                                      |                                                                                                                                                                                             |                                                                                                                                                                                                                                                                                                                                                               |                                                                                                                                                                                                                                                                                                              |                                                                                                                                                                                                    |                                                                                                                                                                                                                                                                                                                                                        |                                                                                                                                                                                                                                                                                                                                                                                                                                                                                                |    |   |  |
| 15 |                              |             |                                                                                      |                                                                                                                                                                                             |                                                                                                                                                                                                                                                                                                                                                               |                                                                                                                                                                                                                                                                                                              |                                                                                                                                                                                                    |                                                                                                                                                                                                                                                                                                                                                        |                                                                                                                                                                                                                                                                                                                                                                                                                                                                                                |    |   |  |
| 16 |                              |             |                                                                                      |                                                                                                                                                                                             |                                                                                                                                                                                                                                                                                                                                                               |                                                                                                                                                                                                                                                                                                              |                                                                                                                                                                                                    |                                                                                                                                                                                                                                                                                                                                                        |                                                                                                                                                                                                                                                                                                                                                                                                                                                                                                |    |   |  |
| 17 |                              |             |                                                                                      |                                                                                                                                                                                             |                                                                                                                                                                                                                                                                                                                                                               |                                                                                                                                                                                                                                                                                                              |                                                                                                                                                                                                    |                                                                                                                                                                                                                                                                                                                                                        |                                                                                                                                                                                                                                                                                                                                                                                                                                                                                                |    |   |  |
| 18 |                              |             |                                                                                      |                                                                                                                                                                                             |                                                                                                                                                                                                                                                                                                                                                               |                                                                                                                                                                                                                                                                                                              |                                                                                                                                                                                                    |                                                                                                                                                                                                                                                                                                                                                        |                                                                                                                                                                                                                                                                                                                                                                                                                                                                                                |    |   |  |
| 19 |                              |             |                                                                                      |                                                                                                                                                                                             |                                                                                                                                                                                                                                                                                                                                                               |                                                                                                                                                                                                                                                                                                              |                                                                                                                                                                                                    |                                                                                                                                                                                                                                                                                                                                                        |                                                                                                                                                                                                                                                                                                                                                                                                                                                                                                |    |   |  |
| 20 |                              |             |                                                                                      |                                                                                                                                                                                             |                                                                                                                                                                                                                                                                                                                                                               |                                                                                                                                                                                                                                                                                                              |                                                                                                                                                                                                    |                                                                                                                                                                                                                                                                                                                                                        |                                                                                                                                                                                                                                                                                                                                                                                                                                                                                                |    |   |  |
| 21 |                              |             |                                                                                      |                                                                                                                                                                                             |                                                                                                                                                                                                                                                                                                                                                               |                                                                                                                                                                                                                                                                                                              |                                                                                                                                                                                                    |                                                                                                                                                                                                                                                                                                                                                        |                                                                                                                                                                                                                                                                                                                                                                                                                                                                                                |    |   |  |
| 22 |                              |             |                                                                                      |                                                                                                                                                                                             |                                                                                                                                                                                                                                                                                                                                                               |                                                                                                                                                                                                                                                                                                              |                                                                                                                                                                                                    |                                                                                                                                                                                                                                                                                                                                                        |                                                                                                                                                                                                                                                                                                                                                                                                                                                                                                |    |   |  |
| 23 |                              |             |                                                                                      |                                                                                                                                                                                             |                                                                                                                                                                                                                                                                                                                                                               |                                                                                                                                                                                                                                                                                                              |                                                                                                                                                                                                    |                                                                                                                                                                                                                                                                                                                                                        |                                                                                                                                                                                                                                                                                                                                                                                                                                                                                                |    |   |  |
| 24 |                              |             |                                                                                      |                                                                                                                                                                                             |                                                                                                                                                                                                                                                                                                                                                               |                                                                                                                                                                                                                                                                                                              |                                                                                                                                                                                                    |                                                                                                                                                                                                                                                                                                                                                        |                                                                                                                                                                                                                                                                                                                                                                                                                                                                                                |    |   |  |
| 25 |                              |             |                                                                                      |                                                                                                                                                                                             |                                                                                                                                                                                                                                                                                                                                                               |                                                                                                                                                                                                                                                                                                              |                                                                                                                                                                                                    |                                                                                                                                                                                                                                                                                                                                                        |                                                                                                                                                                                                                                                                                                                                                                                                                                                                                                |    |   |  |
| 26 |                              |             |                                                                                      |                                                                                                                                                                                             |                                                                                                                                                                                                                                                                                                                                                               |                                                                                                                                                                                                                                                                                                              |                                                                                                                                                                                                    |                                                                                                                                                                                                                                                                                                                                                        |                                                                                                                                                                                                                                                                                                                                                                                                                                                                                                |    |   |  |
| 27 |                              |             |                                                                                      |                                                                                                                                                                                             |                                                                                                                                                                                                                                                                                                                                                               |                                                                                                                                                                                                                                                                                                              |                                                                                                                                                                                                    |                                                                                                                                                                                                                                                                                                                                                        |                                                                                                                                                                                                                                                                                                                                                                                                                                                                                                |    |   |  |
| 28 | 20. Byers et al. (2003), USA | Mothers/ 19 | Mean (SD)<br><br>Control: 29 (2.00)<br><br>Interv: 28.9 (2.42)<br><br>/ level II-III | For the outcome of parent satisfaction:<br><br>Non-randomised, Convenience sampling<br><br><i>Group level effect:</i> Intervention/ control groups<br><br>Pre and post-intervention testing | <u>Intervention: Co-bedding premature multiple-gestation infants in incubators.</u><br><br>Infants were nursed in the same incubator using a co-bedding protocol (e.g. recording all of the care provided to one infant before providing care to the second infant)<br><br><u>Control:</u> Single-bedding premature multiple-gestation infants in incubators. | <u>Parent satisfaction related to:</u><br>- staff concern<br>- support of family<br>- staff explanations<br>- infant environment,<br>- comfort with feeding<br>- kangaroo care encouragement<br>- staff explanation of signs of infant stress<br>- visiting schedule<br>- overall satisfaction with the NICU | During babies' admission (twice)<br><br>- At baseline<br><br>- 5 days later                                                                                                                        | <i>Satisfaction questionnaire</i><br><br>The NICU's standard parental satisfaction tool was used.<br><br><u>Validation:</u> Partially reported. Authors stated content validity testing took place, but because of the disparate nature of the items, survey reliability could not be assessed.<br><br>11 questions.<br><br>5-point Likert-type scale. | <b>The only significant difference for a post-intervention item was a higher score for the item "Attempts were made to create a quiet environment for my baby."</b><br><br><b>Interv Control p-value</b><br><b>Mean 4.80 3.89 0.033</b><br><br>Independent t-tests comparing the co-bedded and control group parental scores found no significant differences in their parental satisfaction scores, except for higher baseline parental satisfaction scores (p=0.029) in the co-bedded group. | No | 1 |  |
| 29 |                              |             |                                                                                      |                                                                                                                                                                                             |                                                                                                                                                                                                                                                                                                                                                               |                                                                                                                                                                                                                                                                                                              |                                                                                                                                                                                                    |                                                                                                                                                                                                                                                                                                                                                        |                                                                                                                                                                                                                                                                                                                                                                                                                                                                                                |    |   |  |
| 30 |                              |             |                                                                                      |                                                                                                                                                                                             |                                                                                                                                                                                                                                                                                                                                                               |                                                                                                                                                                                                                                                                                                              |                                                                                                                                                                                                    |                                                                                                                                                                                                                                                                                                                                                        |                                                                                                                                                                                                                                                                                                                                                                                                                                                                                                |    |   |  |
| 31 |                              |             |                                                                                      |                                                                                                                                                                                             |                                                                                                                                                                                                                                                                                                                                                               |                                                                                                                                                                                                                                                                                                              |                                                                                                                                                                                                    |                                                                                                                                                                                                                                                                                                                                                        |                                                                                                                                                                                                                                                                                                                                                                                                                                                                                                |    |   |  |
| 32 |                              |             |                                                                                      |                                                                                                                                                                                             |                                                                                                                                                                                                                                                                                                                                                               |                                                                                                                                                                                                                                                                                                              |                                                                                                                                                                                                    |                                                                                                                                                                                                                                                                                                                                                        |                                                                                                                                                                                                                                                                                                                                                                                                                                                                                                |    |   |  |
| 33 |                              |             |                                                                                      |                                                                                                                                                                                             |                                                                                                                                                                                                                                                                                                                                                               |                                                                                                                                                                                                                                                                                                              |                                                                                                                                                                                                    |                                                                                                                                                                                                                                                                                                                                                        |                                                                                                                                                                                                                                                                                                                                                                                                                                                                                                |    |   |  |
| 34 |                              |             |                                                                                      |                                                                                                                                                                                             |                                                                                                                                                                                                                                                                                                                                                               |                                                                                                                                                                                                                                                                                                              |                                                                                                                                                                                                    |                                                                                                                                                                                                                                                                                                                                                        |                                                                                                                                                                                                                                                                                                                                                                                                                                                                                                |    |   |  |
| 35 |                              |             |                                                                                      |                                                                                                                                                                                             |                                                                                                                                                                                                                                                                                                                                                               |                                                                                                                                                                                                                                                                                                              |                                                                                                                                                                                                    |                                                                                                                                                                                                                                                                                                                                                        |                                                                                                                                                                                                                                                                                                                                                                                                                                                                                                |    |   |  |
| 36 |                              |             |                                                                                      |                                                                                                                                                                                             |                                                                                                                                                                                                                                                                                                                                                               |                                                                                                                                                                                                                                                                                                              |                                                                                                                                                                                                    |                                                                                                                                                                                                                                                                                                                                                        |                                                                                                                                                                                                                                                                                                                                                                                                                                                                                                |    |   |  |
| 37 |                              |             |                                                                                      |                                                                                                                                                                                             |                                                                                                                                                                                                                                                                                                                                                               |                                                                                                                                                                                                                                                                                                              |                                                                                                                                                                                                    |                                                                                                                                                                                                                                                                                                                                                        |                                                                                                                                                                                                                                                                                                                                                                                                                                                                                                |    |   |  |
| 38 |                              |             |                                                                                      |                                                                                                                                                                                             |                                                                                                                                                                                                                                                                                                                                                               |                                                                                                                                                                                                                                                                                                              |                                                                                                                                                                                                    |                                                                                                                                                                                                                                                                                                                                                        |                                                                                                                                                                                                                                                                                                                                                                                                                                                                                                |    |   |  |
| 39 |                              |             |                                                                                      |                                                                                                                                                                                             |                                                                                                                                                                                                                                                                                                                                                               |                                                                                                                                                                                                                                                                                                              |                                                                                                                                                                                                    |                                                                                                                                                                                                                                                                                                                                                        |                                                                                                                                                                                                                                                                                                                                                                                                                                                                                                |    |   |  |
| 40 |                              |             |                                                                                      |                                                                                                                                                                                             |                                                                                                                                                                                                                                                                                                                                                               |                                                                                                                                                                                                                                                                                                              |                                                                                                                                                                                                    |                                                                                                                                                                                                                                                                                                                                                        |                                                                                                                                                                                                                                                                                                                                                                                                                                                                                                |    |   |  |
| 41 |                              |             |                                                                                      |                                                                                                                                                                                             |                                                                                                                                                                                                                                                                                                                                                               |                                                                                                                                                                                                                                                                                                              |                                                                                                                                                                                                    |                                                                                                                                                                                                                                                                                                                                                        |                                                                                                                                                                                                                                                                                                                                                                                                                                                                                                |    |   |  |
| 42 |                              |             |                                                                                      |                                                                                                                                                                                             |                                                                                                                                                                                                                                                                                                                                                               |                                                                                                                                                                                                                                                                                                              |                                                                                                                                                                                                    |                                                                                                                                                                                                                                                                                                                                                        |                                                                                                                                                                                                                                                                                                                                                                                                                                                                                                |    |   |  |
| 43 |                              |             |                                                                                      |                                                                                                                                                                                             |                                                                                                                                                                                                                                                                                                                                                               |                                                                                                                                                                                                                                                                                                              |                                                                                                                                                                                                    |                                                                                                                                                                                                                                                                                                                                                        |                                                                                                                                                                                                                                                                                                                                                                                                                                                                                                |    |   |  |
| 44 |                              |             |                                                                                      |                                                                                                                                                                                             |                                                                                                                                                                                                                                                                                                                                                               |                                                                                                                                                                                                                                                                                                              |                                                                                                                                                                                                    |                                                                                                                                                                                                                                                                                                                                                        |                                                                                                                                                                                                                                                                                                                                                                                                                                                                                                |    |   |  |
| 45 |                              |             |                                                                                      |                                                                                                                                                                                             |                                                                                                                                                                                                                                                                                                                                                               |                                                                                                                                                                                                                                                                                                              |                                                                                                                                                                                                    |                                                                                                                                                                                                                                                                                                                                                        |                                                                                                                                                                                                                                                                                                                                                                                                                                                                                                |    |   |  |
| 46 |                              |             |                                                                                      |                                                                                                                                                                                             |                                                                                                                                                                                                                                                                                                                                                               |                                                                                                                                                                                                                                                                                                              |                                                                                                                                                                                                    |                                                                                                                                                                                                                                                                                                                                                        |                                                                                                                                                                                                                                                                                                                                                                                                                                                                                                |    |   |  |



|                                                                                                                            |                                        |                                  |                                                                                  |                                                                                                                        |                                                                                                                                                                                                                                                                                                                                                                                                                                                                                                                                                                                 |                                                                                                                              |                                                                                                                                                                                                                                     |                                                                                                                                                                                                                                                                                                                                                                                                                                                                                                                                                   |                                                                                                                                                                                                                                                                                                                                                                                                                                                                                                                                                                                  |           |          |
|----------------------------------------------------------------------------------------------------------------------------|----------------------------------------|----------------------------------|----------------------------------------------------------------------------------|------------------------------------------------------------------------------------------------------------------------|---------------------------------------------------------------------------------------------------------------------------------------------------------------------------------------------------------------------------------------------------------------------------------------------------------------------------------------------------------------------------------------------------------------------------------------------------------------------------------------------------------------------------------------------------------------------------------|------------------------------------------------------------------------------------------------------------------------------|-------------------------------------------------------------------------------------------------------------------------------------------------------------------------------------------------------------------------------------|---------------------------------------------------------------------------------------------------------------------------------------------------------------------------------------------------------------------------------------------------------------------------------------------------------------------------------------------------------------------------------------------------------------------------------------------------------------------------------------------------------------------------------------------------|----------------------------------------------------------------------------------------------------------------------------------------------------------------------------------------------------------------------------------------------------------------------------------------------------------------------------------------------------------------------------------------------------------------------------------------------------------------------------------------------------------------------------------------------------------------------------------|-----------|----------|
|                                                                                                                            |                                        |                                  |                                                                                  |                                                                                                                        | <i>experience</i>                                                                                                                                                                                                                                                                                                                                                                                                                                                                                                                                                               |                                                                                                                              |                                                                                                                                                                                                                                     |                                                                                                                                                                                                                                                                                                                                                                                                                                                                                                                                                   |                                                                                                                                                                                                                                                                                                                                                                                                                                                                                                                                                                                  |           |          |
| 1<br>2<br>3<br>4                                                                                                           |                                        |                                  |                                                                                  |                                                                                                                        |                                                                                                                                                                                                                                                                                                                                                                                                                                                                                                                                                                                 |                                                                                                                              |                                                                                                                                                                                                                                     |                                                                                                                                                                                                                                                                                                                                                                                                                                                                                                                                                   |                                                                                                                                                                                                                                                                                                                                                                                                                                                                                                                                                                                  |           |          |
| 5<br>6<br>7<br>8<br>9<br>10<br>11<br>12<br>13<br>14<br>15<br>16<br>17<br>18<br>19<br>20<br>21                              | 21. Polizzi et al. (2003), USA         | Mothers and fathers/ 33          | Mean (SD)<br>Control: 32.97 (1.9)<br><br>Interv: 33.08 (1.31)<br><br>/ level III | A retrospective, comparative, descriptive design.<br><br><i>Unit level effect</i>                                      | <b>Intervention: Co-bedding multiple-gestation infants in the NICU.</b><br><br>Multiple-gestation infants were nursed in the same incubator or crib. The intervention was evaluated retrospectively after implementation of a co-bedding practice protocol.<br><br><b>Control:</b> Traditionally-bedded group (babies were routinely placed in separate incubators or cribs)                                                                                                                                                                                                    | <b>Parental satisfaction as measured by 9 questions relating to parent perceptions and their baby's care</b>                 | After babies were discharged (once)<br><br>- All parents were mailed the survey. A second survey was sent to those who did not respond after 2 months<br><br>No pre-intervention parent satisfaction data available for comparison. | <i>Satisfaction questionnaire</i><br><br>The <i>parental perception/satisfaction tool</i> was used.<br><br><b>Validation:</b> Partially reported. Authors stated content validity testing took place; no information on reliability testing provided. 6/9 questions were from a similar tool that was validated by the Vermont Oxford NICU Quality Improvement Initiative.<br><br>9 questions (such as "I was satisfied with the care my babies received in the hospital").<br><br>Likert (1 strongly disagree- 5 strongly agree)                 | Mothers reported overall satisfaction with the NICU care and staff, as well as adequacy of their ability to care for their infants after discharge, with scores ranging from 4.19 to 4.71.<br><br><b>The only survey item score that was significantly different between groups was for the item "I was encouraged by the hospital staff to bond with my babies."</b><br><br><b>Interv Control p-value</b><br><b>Mean 4.71 4.36 0.049</b>                                                                                                                                        | <b>No</b> | <b>1</b> |
| 22<br>23<br>24<br>25<br>26<br>27<br>28<br>29<br>30<br>31<br>32<br>33<br>34<br>35<br>36<br>37<br>38<br>39<br>40<br>41<br>42 | 22. Legault and Goulet. (1995), Canada | Mothers/ 61 completed both tests | Mean (range)<br>30 (24-35)<br><br>/ level II                                     | Time-series design<br><br><i>Group level effect: Same group exposed to both methods with post-method testing only.</i> | <b>Intervention: Kangaroo method of removing an infant from an incubator.</b><br><br>Mothers were taught the "kangaroo method" (skin-to-skin contact): infant wears a diaper/head cap and is placed in a vertical position on the parent's bared chest. A blanket covers the infant and the parent's clothing is fastened around the infant. The parent sits in a rocking chair, inclined so that the infant's head is at 60'.<br><br><b>Control:</b> Traditional method. Newborns wearing a diaper and a head cap, are wrapped in a blanket and placed in their parent's arms. | <b>Mothers' satisfaction with:</b><br>- Each method of removing an infant from incubator<br>- Her feelings after each method | During babies' admission (twice)<br><br>- After the intervention<br><br>- After the control method<br><br>No pre-intervention parent satisfaction data available for comparison.                                                    | <i>Satisfaction questionnaire</i><br><br>The "Maternal Satisfaction Questionnaire" was used. It was developed by integrating components described by Affonso et al and the clinical experience of the investigators.<br><br><b>Validation:</b> Partially reported. Authors stated content validity testing took place; no information on reliability testing provided.<br><br>15 questions<br><br>Likert (1 very much-5 don't know)<br><br>An open-ended question invited the mother to list and explain anything else related to her experience. | <b>Regardless of the method tested, mothers expressed high levels of satisfaction (it was the first time since giving birth that they could hold their infants).</b><br><br>Three statements proved more powerful in discriminating between the methods:<br><br><b>Rated higher after the kangaroo method test:</b><br>- "I like the contact with my baby's skin" (p=0.0001)<br><br><b>Rated higher after the traditional method test:</b><br>- "I like to talk to and whisper to my baby" (p = 0.015)<br>- "I looked into my baby's eyes and stared at his/her face" (p=0.0001) | <b>No</b> | <b>1</b> |

# BMJ Paediatrics Open

## Interventions to improve quantitative measures of parent satisfaction in neonatal care: a systematic review

|                               |                                                                                                                                                                                                                                                                                                                                                                                                                                                                                                                                                                                                              |
|-------------------------------|--------------------------------------------------------------------------------------------------------------------------------------------------------------------------------------------------------------------------------------------------------------------------------------------------------------------------------------------------------------------------------------------------------------------------------------------------------------------------------------------------------------------------------------------------------------------------------------------------------------|
| Journal:                      | <i>BMJ Paediatrics Open</i>                                                                                                                                                                                                                                                                                                                                                                                                                                                                                                                                                                                  |
| Manuscript ID                 | bmjpo-2019-000613.R2                                                                                                                                                                                                                                                                                                                                                                                                                                                                                                                                                                                         |
| Article Type:                 | Original research                                                                                                                                                                                                                                                                                                                                                                                                                                                                                                                                                                                            |
| Date Submitted by the Author: | 03-Jan-2020                                                                                                                                                                                                                                                                                                                                                                                                                                                                                                                                                                                                  |
| Complete List of Authors:     | Sakonidou, Susanna; Imperial College London, Neonatal Medicine, School of Public Health, Faculty of Medicine<br>Andrzejewska, Izabela; Imperial College London, Neonatal Medicine, School of Public Health, Faculty of Medicine<br>Webbe, James; Imperial College London, Neonatal Medicine, School of Public Health, Faculty of Medicine<br>Modi, Neena; Imperial College London, Neonatal Medicine, School of Public Health, Faculty of Medicine<br>Bell, Derek; NIHR CLAHRC for Northwest London<br>Gale, Chris; Imperial College London, Neonatal Medicine, School of Public Health, Faculty of Medicine |
| Keywords:                     | Neonatology, Outcomes research, Patient perspective                                                                                                                                                                                                                                                                                                                                                                                                                                                                                                                                                          |
|                               |                                                                                                                                                                                                                                                                                                                                                                                                                                                                                                                                                                                                              |

SCHOLARONE™  
Manuscripts



I, the Submitting Author has the right to grant and does grant on behalf of all authors of the Work (as defined in the below author licence), an exclusive licence and/or a non-exclusive licence for contributions from authors who are: i) UK Crown employees; ii) where BMJ has agreed a CC-BY licence shall apply, and/or iii) in accordance with the terms applicable for US Federal Government officers or employees acting as part of their official duties; on a worldwide, perpetual, irrevocable, royalty-free basis to BMJ Publishing Group Ltd ("BMJ") its licensees and where the relevant Journal is co-owned by BMJ to the co-owners of the Journal, to publish the Work in this journal and any other BMJ products and to exploit all rights, as set out in our [licence](#).

The Submitting Author accepts and understands that any supply made under these terms is made by BMJ to the Submitting Author unless you are acting as an employee on behalf of your employer or a postgraduate student of an affiliated institution which is paying any applicable article publishing charge ("APC") for Open Access articles. Where the Submitting Author wishes to make the Work available on an Open Access basis (and intends to pay the relevant APC), the terms of reuse of such Open Access shall be governed by a Creative Commons licence – details of these licences and which [Creative Commons](#) licence will apply to this Work are set out in our licence referred to above.

Other than as permitted in any relevant BMJ Author's Self Archiving Policies, I confirm this Work has not been accepted for publication elsewhere, is not being considered for publication elsewhere and does not duplicate material already published. I confirm all authors consent to publication of this Work and authorise the granting of this licence.

1  
2  
3 **1 Interventions to improve quantitative measures of parent satisfaction in**  
4  
5 **2 neonatal care: a systematic review**  
6  
7  
8  
9

10 4 Susanna Sakonidou<sup>1</sup>, Izabela Andrzejewska<sup>2</sup>, James Webbe<sup>3</sup>, Neena Modi<sup>4</sup>, Derek  
11  
12 5 Bell<sup>5</sup>, Chris Gale<sup>6</sup>  
13  
14  
15  
16

17 7 1 Susanna Sakonidou, Clinical Research Fellow

18 8 Highest academic degree: MBBS

19 9 Neonatal Medicine, School of Public Health, Faculty of Medicine, Imperial College

20  
21  
22  
23  
24 10 London, United Kingdom.

25  
26 11 s.sakonidou@imperial.ac.uk  
27  
28  
29

30  
31  
32

33 13 2 Izabela Andrzejewska, Neonatal Research Nurse

34 14 Highest academic degree: RN MSc

35 15 Neonatal Medicine, School of Public Health, Faculty of Medicine, Imperial College

36  
37  
38 16 London, United Kingdom.

39  
40 17 Izabela.ukpl@gmail.com  
41  
42  
43

44  
45  
46

47 19 3 James Webbe, Clinical Research Fellow

48 20 Highest academic degree: MB BChir

49 21 Neonatal Medicine, School of Public Health, Faculty of Medicine, Imperial College.

50  
51  
52 22 London, United Kingdom.

53  
54 23 j.webbe@imperial.ac.uk  
55  
56  
57

58  
59  
60

25 4 Neena Modi, Professor of Neonatal Medicine

1  
2  
3 26 Highest academic degree: MD  
4  
5 27 Neonatal Medicine, School of Public Health, Faculty of Medicine, Imperial College  
6  
7 28 London, United Kingdom.  
8  
9  
10 29 n.modi@imperial.ac.uk  
11  
12 30  
13  
14 31 5 Derek Bell, Professor of Acute Medicine and NIHR CLAHRC Programme Director  
15  
16  
17 32 Highest academic degree: MD  
18  
19 33 National Institute for Health Research Collaboration for Leadership in Applied  
20  
21 34 Health Research and Care, Northwest London, United Kingdom.  
22  
23 35 d.bell@imperial.ac.uk  
24  
25  
26 36  
27  
28 37 6 Chris Gale, Reader in Neonatal Medicine  
29  
30  
31 38 Highest academic degree: PhD  
32  
33 39 Neonatal Medicine, School of Public Health, Faculty of Medicine, Imperial College  
34  
35 40 London.  
36  
37 41 London, United Kingdom.  
38  
39 42 christopher.gale@imperial.ac.uk  
40  
41  
42 43  
43  
44 44 Corresponding Author  
45  
46 45 Susanna Sakonidou, Clinical Research Fellow  
47  
48 46 Neonatal Medicine, School of Public Health, Faculty of Medicine, Imperial College  
49  
50 47 London  
51  
52 48 369 Fulham Road, London, SW10 9NH, United Kingdom.  
53  
54 49 + 44 (0) 203 315 5418, s.sakonidou@imperial.ac.uk  
55  
56  
57 50  
58  
59  
60

1  
2  
3 51 Manuscript word count: 3245  
4  
5  
6 52

7  
8 53 **ABSTRACT**  
9

10 54

11  
12 55 **Objective**

13  
14 56 Interventions improving parent satisfaction can reduce parent stress, may improve  
15  
16 57 parent-infant bonding and infant outcomes. Our objective was to systematically  
17  
18 58 review neonatal interventions relating to parents of infants of all gestations where an  
19  
20 59 outcome was parent satisfaction.  
21  
22  
23

24 60

25  
26 61 **Methods**  
27

28  
29 62 We searched the databases MEDLINE, EMBASE, PsychINFO, Cochrane Central,  
30  
31 63 CINAHL, HMIC, Maternity and Infant Care between 1/1/1946-1/10/2017. Inclusion  
32  
33 64 criteria were randomised controlled trials (RCT), cohort studies and other non-  
34  
35 65 randomised studies if participants were parents of infants receiving neonatal care,  
36  
37 66 interventions were implemented in neonatal units (of any care level) and  $\geq 1$   
38  
39 67 quantitative outcome of parent satisfaction was measured. Included studies were  
40  
41 68 limited to the English language only. We extracted study characteristics,  
42  
43 69 interventions, outcomes and parent involvement in intervention design. Included  
44  
45 70 studies were not sufficiently homogenous to enable quantitative synthesis. We  
46  
47 71 assessed quality with the Cochrane Collaboration risk of bias tool (randomised) and  
48  
49 72 the ROBINS-I tool (non-randomised studies).  
50  
51  
52  
53

54 73

55  
56 74 **Results**  
57  
58  
59  
60

1  
2  
3 75 We identified 32 studies with satisfaction measures from over 2800 parents and  
4  
5 76 grouped interventions into 5 themes. Most studies were non-randomised involving  
6  
7 77 preterm infants. Parent satisfaction was measured by 334 different questions in 29  
8  
9  
10 78 questionnaires (only 6/29 fully validated). 18/32 studies reported higher parent  
11  
12 79 satisfaction in the intervention group. The theme with most studies reporting higher  
13  
14 80 satisfaction was parent involvement (10/14). Five (5/32) studies reported involving  
15  
16  
17 81 parents in intervention design. All studies had high risk of bias.  
18  
19  
20  
21  
22

### 23 83 **Conclusions**

24 84 Many interventions, commonly relating to parent involvement, are reported to  
25  
26 85 improve parent satisfaction. Inconsistency in satisfaction measurements and high risk  
27  
28 86 of bias makes this low-quality evidence. Standardised, validated parent satisfaction  
29  
30 87 measures are needed, as well as higher quality trials of parent experience involving  
31  
32  
33 88 parents in intervention design.  
34  
35  
36  
37  
38

39 90 **PROSPERO registration:** CRD42017072388  
40  
41  
42

43 92 **Keywords:** neonatology, parents, satisfaction  
44  
45  
46  
47

### 48 94 **INTRODUCTION**

49 95 One in 10 newborn babies in high-income countries require neonatal care[1]. This is  
50  
51 96 stressful for parents, who often develop anxiety, depression and Post Traumatic  
52  
53 97 Stress Disorder symptoms[2-4]. Parental stress interferes with parent-child  
54  
55  
56 98 bonding[5] and there is a well-established link between maternal mental health and  
57  
58 99 infant development[6]. Parent satisfaction, defined as “*the perception of parents’*  
59  
60

1  
2  
3 100 *needs and expectations being met*” is inversely related to parental stress[7]. As such,  
4  
5 101 it is increasingly being used as a parent experience measure and neonatal service  
6  
7 102 quality indicator. Interventions aimed at improving parent satisfaction have the  
8  
9 103 potential to reduce parent stress, improve parent-infant bonding[8] and infant  
10  
11 104 outcomes[9].  
12  
13  
14  
15  
16

17 106 A range of parent-centred interventions, such as including parents on ward rounds,  
18  
19 107 have recently become widespread in neonatal practice. Many are implemented on a  
20  
21 108 small scale, without evaluating their impact on parent experience, making long-term  
22  
23 109 integration into neonatal services challenging, while many others are using parent  
24  
25 110 questionnaires. ‘Parent satisfaction’ as an outcome is gaining momentum, as neonatal  
26  
27 111 trusts attempt to match more ‘business-like models’ where effectiveness of  
28  
29 112 interventions (and evidence for change) is measured by quantitative outcomes.  
30  
31 113 Moreover, where parent experience is measured as ‘parent satisfaction’, some studies  
32  
33 114 include it as a primary outcome, whereas others use it as a secondary indicator to  
34  
35 115 explore the parent point of view.  
36  
37  
38  
39  
40

41 116  
42 117 Furthermore, there are multiple experience measures available in addition to parent  
43  
44 118 satisfaction, including parent stress, anxiety and depression scales; both quantitative  
45  
46 119 and qualitative. Finally, it is not known the degree to which parents are involved in  
47  
48 120 the design of such interventions. There have been no previous systematic evaluations  
49  
50 121 focused on interventions measuring parent satisfaction with neonatal care as an  
51  
52 122 outcome.  
53  
54  
55

56 123

57  
58 124 The aim of this review is to identify and describe neonatal interventions relating to  
59  
60



1  
2  
3 125 parents of infants of all gestations where an outcome was parent satisfaction. For the  
4  
5 126 reasons outlined above, we have only included studies that reported  $\geq 1$  quantitative  
6  
7 127 measure of parent satisfaction. We aim to report each intervention's effect on parent  
8  
9 128 satisfaction, as well as parent input in intervention design.  
10  
11  
12

## 13 129 **METHODS**

14  
15  
16  
17 130 We prospectively registered this study on PROSPERO[10] (prospective register of  
18  
19 131 systematic reviews-CRD42017072388) and reported it using PRISMA  
20  
21 132 guidelines[11]. We searched MEDLINE (Medical Literature Analysis and Retrieval  
22  
23 133 System Online), EMBASE (Excerpta Medica database), PsychINFO (Psychological  
24  
25 134 Information), Cochrane Central Register of Controlled Trials, CINAHL  
26  
27 135 (CUMULATIVE Index to NURSING and Allied HEALTH LITERATURE), HMIC  
28  
29 136 (Health Management Information Consortium), Maternity and Infant Care (online\_  
30  
31 137 supplementaryFile1) for English papers published between 1946-October 2017, with  
32  
33 138 update searches on 1<sup>st</sup> September 2018.  
34  
35  
36  
37  
38  
39

40 140 Inclusion criteria were: randomised controlled trials (RCT) and non-randomised  
41  
42 141 studies (non-RCT) if participants were parents of infants receiving neonatal care,  
43  
44 142 interventions were implemented in neonatal units and  $\geq 1$  quantitative outcome of  
45  
46 143 parent satisfaction was measured. We have restricted our review to studies where  $\geq 1$   
47  
48 144 quantitative outcome of parent satisfaction was measured, in order to enable  
49  
50 145 comparison of interventions, which has previously not been possible in any published  
51  
52 146 review. Including studies with all available measures of parent experience (in  
53  
54 147 addition to parent satisfaction), as well as those only qualitatively evaluated, would  
55  
56 148 make any comparison very difficult. By using these pre-registered search criteria, we  
57  
58  
59  
60

1  
2  
3 149 also ensured we would capture studies measuring parent satisfaction both as primary  
4  
5 150 and as secondary outcomes. We included studies from all neonatal care level units  
6  
7  
8 151 and all healthcare settings, without excluding studies in low or middle-income  
9  
10 152 settings. This was because definitions of neonatal care levels differ between different  
11  
12 153 countries and healthcare settings, making them not easily comparable. Moreover,  
13  
14 154 different levels of care are found within the same hospital settings. We excluded  
15  
16  
17 155 systematic reviews, entirely qualitative studies, grey literature (e.g. conference  
18  
19 156 abstracts), studies only reporting protocols or abstracts and full reports not in English.  
20  
21 157

22  
23  
24 158 Two authors (SS, IA) independently double-screened titles and abstracts, reviewed  
25  
26 159 full texts for eligibility and resolved any discrepancies with a third reviewer (JW).  
27  
28 160 We extracted data using a pilot-tested, standardised data extraction form including  
29  
30 161 study characteristics, interventions, outcomes and parent input into interventions’  
31  
32  
33 162 design. We assessed methodological quality with the Cochrane Collaboration risk of  
34  
35 163 bias tool[12] for RCT and the ROBINS-I tool[13] for non-RCT.  
36  
37 164

38  
39  
40 165 We presented individual study aggregate data in a narrative synthesis, grouped  
41  
42 166 studies into themes using a Grounded Theory Approach[14] and planned meta-  
43  
44 167 analysis where data were appropriate for quantitative synthesis.  
45  
46

47 168

### 49 169 **Patient involvement**

50  
51 170 This review was conceived in response to the clinical need identified by parents with  
52  
53 171 neonatal care experience; a partnership including families with experience of preterm  
54  
55  
56 172 birth identified “what emotional and practical support improves attachment and  
57  
58 173 bonding, and does the provision of such support improve outcomes for premature  
59  
60

1  
2  
3 174 babies and their families?” as a top 10 research priority[15]. Additionally, this review  
4  
5 175 was conceived as part of planning a wider project to pilot a neonatal intervention,  
6  
7 176 with parents’ full input. Patients were not directly involved in the design, conduct,  
8  
9  
10 177 reporting or dissemination plans of our research.  
11

12 178

## 13 179 **RESULTS**

14 180

15 181 We identified 8362 studies for screening and assessed 73 full text articles for  
16  
17 182 eligibility (Figure 1). A total of 32 studies describing interventions that measured  
18  
19 183 parent satisfaction in neonatal care as an outcome met the inclusion criteria, reporting  
20  
21 184 data from over 2866 parents, 1 study did not report number of parents. Our analysis  
22  
23 185 included 10 RCT and 22 non-RCT: 3 cohort trials, 18 unspecified designs and 1  
24  
25 186 implementation project (Tables 1-3). We further classified the unspecified non-RCT  
26  
27 187 into 2 types, depending on how they defined their control groups and how they  
28  
29 188 evaluated parent satisfaction (Table 3).

- 30  
31  
32  
33  
34  
35  
36  
37 189 1. “*Unit- level effect*”: Studies that assessed parent satisfaction during a period  
38  
39 190 of routine care (control group) and introduced the intervention at a later time,  
40  
41 191 with a different group of parents. In these studies improvement in parent  
42  
43 192 satisfaction was evaluated between different parent groups, on a *unit level*.  
44  
45  
46 193 2. “*Group level effect*”: Studies that formed intervention and control groups  
47  
48 194 using convenience sampling during the same time period. Both groups (or  
49  
50 195 sometimes only the intervention group) had satisfaction measured after the  
51  
52 196 intervention period (post intervention testing). Baseline parent satisfaction  
53  
54 197 was also measured in both groups (pre intervention testing) in some studies.  
55  
56 198 Improvement in parent satisfaction was demonstrated either by comparing  
57  
58  
59  
60

1  
2  
3 199 outcomes between intervention/control groups following the intervention, or  
4  
5 200 in comparison with the pre-intervention data.  
6  
7  
8 201

9  
10 202 Parent participants included mothers (14 studies), mothers and fathers (10 studies) or  
11  
12 203 were not specified (7 studies). One study defined parent participants as a dyad of the  
13  
14 204 mother with her designated support person. Median parent sample size was 63,  
15  
16 205 ranging 7-482. This was higher for RCT (108 studies) compared to non-RCT (61  
17  
18 206 studies).  
19  
20  
21 207

22  
23  
24 208 Study participants included parents of babies across the full range of gestations (23-  
25  
26 209 42 weeks). Overall, 24/32 (75%) of studies involved preterm infants, 5/32 (16%)  
27  
28 210 term infants and 7 studies did not state the gestational age of infants involved. Most  
29  
30 211 studies (19, 59%) involved only preterm infants (up to 37 weeks); only 1 study (3%)  
31  
32 212 involved only term infants and 5 studies (16%) involved both preterm and term  
33  
34 213 infants. Preterm infants were included in 44% of RCT, versus 63% of non-RCT.  
35  
36 214

37  
38  
39 215 Most studies were reported as conducted in level III neonatal units (17 studies),  
40  
41 216 followed by level not stated (9 studies), level II-III (3 studies), level II (2 studies) and  
42  
43 217 level I (1 study). Definitions of neonatal levels of care are not standardised but vary  
44  
45 218 across different countries; none of the included studies have explicitly stated which  
46  
47 219 definition applies to them.  
48  
49  
50 220

51  
52  
53 221 Tables 1-3 show the key characteristics of included studies. They include a  
54  
55 222 description of each study's parent and infant sample, study design and intervention,  
56  
57  
58  
59  
60

223 outcome measures (timing and methods), results, parent input into intervention

224 design and study impact on parent satisfaction.

225

226 **Table 1. Included Randomised Controlled Trials (RCT)**

| Randomised controlled trials (RCT) by publication year |                                  |                                                                                    |                                                   |                                                                                                                                                                                                                                                                                                                                                                                                                                                                                                                                                                                                                                                    |                                                                                                                                                                          |                                                                                                                                                                                           |                                                                                                                                                                                                                                                                                                                                                                                                                                                                                                                 |                                                                                                                                                                                                                                                                                                                                                                                                                                                                                                                                                                                                                |                   |                               |
|--------------------------------------------------------|----------------------------------|------------------------------------------------------------------------------------|---------------------------------------------------|----------------------------------------------------------------------------------------------------------------------------------------------------------------------------------------------------------------------------------------------------------------------------------------------------------------------------------------------------------------------------------------------------------------------------------------------------------------------------------------------------------------------------------------------------------------------------------------------------------------------------------------------------|--------------------------------------------------------------------------------------------------------------------------------------------------------------------------|-------------------------------------------------------------------------------------------------------------------------------------------------------------------------------------------|-----------------------------------------------------------------------------------------------------------------------------------------------------------------------------------------------------------------------------------------------------------------------------------------------------------------------------------------------------------------------------------------------------------------------------------------------------------------------------------------------------------------|----------------------------------------------------------------------------------------------------------------------------------------------------------------------------------------------------------------------------------------------------------------------------------------------------------------------------------------------------------------------------------------------------------------------------------------------------------------------------------------------------------------------------------------------------------------------------------------------------------------|-------------------|-------------------------------|
| Author (Date), Country                                 | Parent Gender/sample size        | Infants Gestation age (GA) in weeks /NICU level                                    | Study design                                      | Intervention                                                                                                                                                                                                                                                                                                                                                                                                                                                                                                                                                                                                                                       | Outcome measures                                                                                                                                                         | Timing of measurement                                                                                                                                                                     | Method of measurement                                                                                                                                                                                                                                                                                                                                                                                                                                                                                           | Results                                                                                                                                                                                                                                                                                                                                                                                                                                                                                                                                                                                                        | Parent co-design? | Improved parent satisfaction? |
| 1. Northrup et al. (2016), USA                         | Mothers and fathers /116         | <28 / level III                                                                    | Randomised controlled trial                       | <b>Intervention: Free Parking (FP).</b><br>Parents received 7 parking vouchers at a time (value: \$10/each) and continued to receive vouchers until infant discharge. Each voucher allowed free entry and exit for 24hr.<br><b>Control:</b> Parents received the standard care and did not receive vouchers.                                                                                                                                                                                                                                                                                                                                       | <b>Parent satisfaction with NICU care</b>                                                                                                                                | After babies were discharged (once)<br><br>- During the first high-risk-infant clinic visit after discharge<br><br>No pre-intervention parent satisfaction data available for comparison. | <b>Satisfaction questionnaire</b><br><b>Validation:</b> No content validity or reliability testing reported.<br>11 questions<br><br>- Seven items were summed (score 7-35) to measure "Support" (e.g., information sharing).<br><br>- Three items measured "Emotional Connection" to the infant (score 3-15)<br><br>- One item assessed "family involvement in infant care" (responses: not enough-just right-too much).<br><br>Greater scores indicated higher perceived support, connection and satisfaction. | <b>The groups did not differ significantly with respect to satisfaction.</b><br><br><b>Interv Control p-value</b><br><b>NICU support</b><br><b>Mean (SD)</b> 30(2.7) 28.7(3.7) 0.07<br><br><b>Emotional connection</b><br>12.3(1.7) 12.3(1.7) 0.96<br><br><b>Family involvement</b><br>"Just right"<br>81.4% 85% 0.07                                                                                                                                                                                                                                                                                          | No                | 2                             |
| 2. Abdel-Latif et al. (2015), Australia                | Mothers and fathers /63          | 25-42 / level III                                                                  | Cross-over Randomised Controlled Trial            | <b>Intervention: Parental Presence at Clinical Bedside Rounds (PPCBR).</b><br>Parents attended bedside clinical rounds. Parents had opportunity to ask questions about their baby's condition and management.<br><b>Control:</b> Parents received the standard care with no parental presence at bedside clinical rounds.                                                                                                                                                                                                                                                                                                                          | <b>Parent satisfaction assessed by questions of 3 domains:</b><br>1. Knowledge and understanding<br>2. Communication and collaboration<br>3. Privacy and confidentiality | During babies' admission (once)<br><br>- At the end of each study arm, separated by a washout period<br><br>- No pre-intervention parent satisfaction data available for comparison       | <b>Satisfaction questionnaire</b><br><br>The authors stated "the research team designed the questionnaire".<br><b>Validation:</b> No content validity or reliability testing reported.<br><br>Number and format of questions: not stated                                                                                                                                                                                                                                                                        | <b>PPCBR had significantly higher adjusted mean (95% CI) scores for some questions from domains 1 and 2.</b><br><br>Domain 3 was comparable between the two study groups.<br><br><b>Interv Control p-value</b><br>Domain 1 question:<br>"I have received adequate information about my baby's condition and management"<br><b>Mean</b> 4.321 3.947 0.03<br><br>Domain 2 questions:<br>"In the last week I have been able to communicate effectively with my baby's healthcare team"<br><b>Mean</b> 4.407 4.250 0.05<br><br>"In the last week I have collaborated with my baby's healthcare team in the         | No                | 1                             |
| 3. Bastani et al. (2015), Iran                         | Mothers /100                     | 30-37 Mean (SD)<br>Control: 33.90 (2.33)<br>Interv: 34 (1.9)<br>/ level not stated | Randomised Controlled Trial (block randomisation) | <b>Intervention: Family-centered Care (FCC).</b><br>Mothers allowed access to their baby at any time, participated in the care process and were provided with information about neonatal care.<br><b>Control:</b> Mothers received the standard care where they were only allowed to be present at the time of the infant's entry to the neonatal care unit, and were only routinely informed.                                                                                                                                                                                                                                                     | <b>Maternal satisfaction relating to three themes:</b><br>1. Parental presence<br>2. Participation in neonatal care<br>3. Information about neonatal care                | During babies' admission (twice)<br><br>- 24 hours after admission<br>- At the time of discharge                                                                                          | <b>Satisfaction questionnaire (Validated)</b><br><br>A modified satisfaction questionnaire was used, based on a parental satisfaction instrument developed for measuring satisfaction in Paediatric intensive care Units (PICU).<br>18 questions<br><br>Graded 0 (very dissatisfied) to 4 (very satisfied).<br><br>The overall satisfaction rate was classified based on the mean scores (score=50%, between 75-90% and > 75%).                                                                                 | <b>planning of care for my baby"</b><br><b>Mean</b> 3.843 3.426 0.02<br><br>"In the last week I have been able to ask the healthcare team questions about my baby's care"<br><b>Mean</b> 4.642 4.259 0.004                                                                                                                                                                                                                                                                                                                                                                                                     | Unclear           | 1                             |
| 4. Clarke-Pounder et al. (2015), USA                   | Mothers and fathers /19 families | 23-39 / level III                                                                  | Randomised Controlled Trial                       | <b>Intervention: Sharing information obtained from parent interviews with the primary NICU provider.</b><br>Parents interviewed using the <i>NICU-adapted Decision Making Tool (N-DMT)</i> . Information obtained was placed in the electronic medical record (EMR) and shared with the primary neonatal provider via email. Daily rounds on all infants were audio-recorded for 3 days after enrollment to see if information from the N-DMT was incorporated into daily care planning.<br><b>Control:</b> The content of a recent social work note was communicated with the primary provider via e-mail, creating an attentional control group. | <b>Parent satisfaction with care</b>                                                                                                                                     | During babies' admission (once)<br><br>- 2 weeks after study entry<br><br>No pre-intervention parent satisfaction data available for comparison.                                          | <b>Satisfaction questionnaire</b><br><br>A <i>NICU-adapted Decision Making Tool (N-DMT)</i> - specific questionnaire was used.<br><b>Validation:</b> Partially reported. Authors stated reliability testing took place; no information on content validity provided.<br><br>8 questions: e.g. "My baby's doctors considered my goals and hopes for my baby during decision-making".<br><br>Likert scale (1 strongly agree-4 strongly disagree). Total N-DMT score range 8-32.                                   | <b>There was no significant difference in satisfaction with care as measured by the N-DMT scale between the control group and intervention groups in a univariable model or multiple variable model controlling for gestational age.</b><br><br><b>Interv Control p-value</b><br><b>Median (range)</b><br>26(15-28) 28.8(19-32)<br><br><b>No p-value reported</b><br><br>There was, however, a pattern of decreased satisfaction with care among the intervention group compared to the control group across the N-DMT-specific survey questions, although the differences were not statistically significant. | Yes               | 2                             |
| 5. Holditch-Davis et al. (2013), USA                   | Mothers /208                     | Preterm infants                                                                    | Randomised controlled trial                       | <b>Interventions: 1. Mothers were taught how to massage infants with auditory, tactile, visual,</b>                                                                                                                                                                                                                                                                                                                                                                                                                                                                                                                                                | <b>1. Parent (mother) satisfaction with the</b>                                                                                                                          | During admission period and post discharge                                                                                                                                                | <b>Satisfaction questionnaire</b><br><br>The questionnaire was designed by the study team.                                                                                                                                                                                                                                                                                                                                                                                                                      | <b>No significant differences occurred between the groups.</b>                                                                                                                                                                                                                                                                                                                                                                                                                                                                                                                                                 | No                | 2                             |

227  
228

|                                  |                          |                                                                                     |                                                                            |                                                                                                                                                                                                                                                                                                                                                                                                                                                                                                                                                                                                                                                                                                 |                                                                                                                                                                                                                                                                 |                                                                                                                                                                             |                                                                                                                                                                                                                                                                                                                                                                                                                                                                                                                                                                                                                                                                                                                                                                                                         |                                                                                                                                                                                                                                                                                                                                                                                                                                                                                                                                                                                             |                                                                                                                 |   |
|----------------------------------|--------------------------|-------------------------------------------------------------------------------------|----------------------------------------------------------------------------|-------------------------------------------------------------------------------------------------------------------------------------------------------------------------------------------------------------------------------------------------------------------------------------------------------------------------------------------------------------------------------------------------------------------------------------------------------------------------------------------------------------------------------------------------------------------------------------------------------------------------------------------------------------------------------------------------|-----------------------------------------------------------------------------------------------------------------------------------------------------------------------------------------------------------------------------------------------------------------|-----------------------------------------------------------------------------------------------------------------------------------------------------------------------------|---------------------------------------------------------------------------------------------------------------------------------------------------------------------------------------------------------------------------------------------------------------------------------------------------------------------------------------------------------------------------------------------------------------------------------------------------------------------------------------------------------------------------------------------------------------------------------------------------------------------------------------------------------------------------------------------------------------------------------------------------------------------------------------------------------|---------------------------------------------------------------------------------------------------------------------------------------------------------------------------------------------------------------------------------------------------------------------------------------------------------------------------------------------------------------------------------------------------------------------------------------------------------------------------------------------------------------------------------------------------------------------------------------------|-----------------------------------------------------------------------------------------------------------------|---|
|                                  |                          | Mean (SD)<br>Overall group 27.2 (3.0)<br>/ 4 centres, levels II-III                 | 3 groups (2 intervention and 1 control)<br>Post-intervention testing only. | <b>and vestibular stimulation (ATVV intervention)</b><br><b>2. Kangaroo care</b><br><b>Control:</b> Attention control group. Mothers spent a similar amount of time with the study nurse discussing the equipment needed for preterm infant care at home. Study nurses provided education and support for all three groups. Mothers were not prevented from engaging in interventions of the other groups but did not receive formal education from the study nurse on the other interventions.                                                                                                                                                                                                 | <b>intervention</b><br><b>2. Satisfaction with the helpfulness of the study nurse</b><br><b>3. Whether the mother would recommend the study to others and the degree of change in the mother as a person and as a mother as a result of being in the study.</b> | - At the time of discharge<br>- At 2 months corrected age<br>No pre-intervention parent satisfaction data available for comparison.                                         | <b>Validation:</b> Partially reported. Authors stated reliability testing took place; no information on content validity provided.<br><br><b>26 questions:</b> relating to three dimensions of satisfaction: efficacy, caring, and technical quality.<br><br>Likert (1 least satisfied-5, 5 most satisfied)                                                                                                                                                                                                                                                                                                                                                                                                                                                                                             | Mothers in all three groups were satisfied with the intervention (mean scores of 3.3 or higher on a 5-point scale) and the helpfulness of the nurse (mean scores of 4.6 or higher on a 5-point scale).                                                                                                                                                                                                                                                                                                                                                                                      |                                                                                                                 |   |
| 6. Franck et al. (2011), UK      | Mothers and fathers /169 | Mean (SD)<br>Control: 31.94 (5.17)<br>Interv: 29.40 (3.17)<br>/4 centres, level III | Cluster Randomised Controlled Trial                                        | <b>Intervention: Increasing parental involvement in infant pain management in the NICU.</b><br><br>Parents received a booklet providing evidence-based information about pain and comforting infants in the NICU setting. Parents received 2 visits from a research nurse showing them how to apply the comforting techniques described in the booklet.<br><br><b>Control:</b> As part of usual care, parents in both the intervention and control groups received a detailed booklet with generic information about NICU care. Parents in the control group also received 2 visits from a research nurse listening to what parents had to say about their NICU experience (attention placebo). | <b>1. Parent satisfaction with NICU care</b><br><br>One week after the intervention:<br><b>1. Satisfaction with information about pain control</b><br><b>2. Satisfied nurses make infant comfortable</b><br><b>3. Satisfied pain medicines help infant</b>      | During babies' admission (twice)<br>-At baseline (within 3 to 7 days of admission)<br>- 1 week after the intervention                                                       | <b>Individual questions</b><br><b>Validation:</b> No content validity or reliability testing reported.<br><br>1. At baseline:<br>Parent satisfaction was measured by 1 question: "Satisfaction with NICU care" (1 very satisfied-6 very unsatisfied) as part of the baseline parent characteristics questionnaire.<br><br>2. One week after the intervention:<br><br>Three questions using the word "satisfied" were selected from the validated Parent Attitudes About Infant Nociception (PAIN) survey (Likert scale 1 very satisfied-6 very unsatisfied)                                                                                                                                                                                                                                             | <b>At baseline: there was no significant difference in satisfaction between intervention and control group</b><br><br><b>Interv Control</b><br><b>Mean</b> 1.45(0.71) 1.51(0.76)<br><b>(SD)</b><br><b>p-value</b> missing<br><br><b>1 week after the intervention: Intervention parents were more satisfied with the information about pain control received than control parents.</b><br><br><b>Interv Control</b><br><b>Mean</b> 2.10(0.97) 3.28(1.27)<br><b>(SD)</b><br><b>p-value</b> < 0.001                                                                                           | Yes<br>The booklet was reviewed by 12 parents of infants who had been cared for in NICUs in the United Kingdom. | 1 |
| 7. Livingston et al. (2009), USA | Mothers /12              | Mean (SD)<br>Control:                                                               | Randomised Controlled Trial                                                | <b>Intervention: Touch and massage.</b><br><br>Mothers attended a 1hr massage class taught by a                                                                                                                                                                                                                                                                                                                                                                                                                                                                                                                                                                                                 | <b>1. Caregiver (mother) satisfaction with their infant's care</b>                                                                                                                                                                                              | During babies' admission (three times)<br>- At baseline                                                                                                                     | <b>Satisfaction questionnaire</b><br><br>Two questionnaires were developed by the research team.                                                                                                                                                                                                                                                                                                                                                                                                                                                                                                                                                                                                                                                                                                        | <b>It is unclear in the report if specific between-group comparisons and statistical analysis were conducted.</b>                                                                                                                                                                                                                                                                                                                                                                                                                                                                           | No                                                                                                              | 3 |
|                                  |                          | 33.4 (6.4)<br>Interv: 38.5 (3.1)<br>/ level III                                     |                                                                            | nurse CIMI (certified infant massage instructor) and were asked to participate in at least 3 bedside massage instruction sessions taught within the next week. Infants received massage for 7 consecutive days, from the mother or a CIMI. The touch procedure lasted 20 minutes.<br><br><b>Control:</b> Infants received all usual hospital services including medical care, physical and occupational therapy services and developmentally supportive nursing care.                                                                                                                                                                                                                           | <b>2. Caregiver satisfaction with the neonatal unit and the massage therapist</b>                                                                                                                                                                               | - Upon completing the 7-day massage program<br><br>- 1 month following intervention                                                                                         | <b>Validation:</b> No content validity or reliability testing reported.<br><br>-1 <sup>st</sup> questionnaire (at baseline): a brief self-report questionnaire about caregiver satisfaction with their infant's care until that moment. No further details reported.<br><br>-2 <sup>nd</sup> questionnaire (upon completing the 7-day massage program and 1 month following intervention): a 10-minute satisfaction questionnaire relating to infant's response and caregiver satisfaction with the neonatal unit and the massage therapist.<br><br><b>Number of questions:</b> not stated.<br><br>Likert scale (1 very dissatisfied-4 very satisfied).<br><br>Sample statements: "How satisfied do you feel giving massage to your infant?"; "I feel that massage improved my infant's hospital stay." | <b>At baseline and day 7:</b> All caregivers were highly satisfied with the medical treatment their infant received.<br><br><b>At day 7 and 1 month follow-up:</b> All caregivers participating in the massage group reported high levels of satisfaction regarding their relationship with their infant and the massage program's impact on that relationship.<br><br>Slight improvements in satisfaction regarding time the caregiver spent with the infant and involvement in the infant's care were observed between day 7 and the 1-month follow-up (no further information reported). |                                                                                                                 |   |
| 8. Koh et al. (2007), Australia  | Mothers /200             | Not stated / not stated                                                             | Randomised, Controlled Trial                                               | <b>Intervention: Provision of taped conversations with neonatologists to mothers.</b><br><br>The initial conversation and subsequent conversations of significance with a neonatologist were taped and analysed (for both groups). Mothers received a tape of each conversation and a tape recorder.<br><br><b>Control:</b> Usual care. Mothers were not given the tape or recorder.                                                                                                                                                                                                                                                                                                            | <b>Satisfaction with conversations held with the neonatologist</b><br><br><b>Satisfaction with the tape</b>                                                                                                                                                     | During admission period and post discharge<br>- At 10 days<br>- At 4 months<br>- At 12 months<br><br>No pre-intervention parent satisfaction data available for comparison. | <b>Individual questions and a satisfaction scale</b><br><br><b>Validation:</b> No content validity or reliability testing reported.<br><br><b>Number of questions:</b> not stated.<br><br>Likert scale (1-5 most satisfied)<br><br>Questions related to: Satisfaction with amount and quality of information presented, doctors' communication skills, patient's participation in the conversation.<br><br>A satisfaction scale was used to assess: Satisfaction with the tape                                                                                                                                                                                                                                                                                                                          | No differences were found between the two groups in satisfaction with conversations.<br><br><b>Mothers of babies with a poor outcome in the tape group were, however, significantly more satisfied with the conversations:</b><br><br><b>Interv Control</b><br><b>Mean</b> (95%CI) 115(104-123.2) 100.5(94.1-109.4)<br><b>p-value</b> 0.0051<br><br>Most (71-92%) of the mothers given the tapes stated that they helped their understanding, reminded them of what had been said, and helped their family to understand and recall information.                                            | No                                                                                                              | 1 |

229  
230

|                                           |                         |                                                                  |                              |                                                                                                                                                                                                                                                                                                                                                                                                                                     |                                                                                         |                                                                                                                                                                                                                                                                                                        |                                                                                                                                                                                                                                                                                                                                                                                                                                                                                                                        |                                                                                                                                                                                                                                                                                                                                                                                                                                                                                                                            |    |   |
|-------------------------------------------|-------------------------|------------------------------------------------------------------|------------------------------|-------------------------------------------------------------------------------------------------------------------------------------------------------------------------------------------------------------------------------------------------------------------------------------------------------------------------------------------------------------------------------------------------------------------------------------|-----------------------------------------------------------------------------------------|--------------------------------------------------------------------------------------------------------------------------------------------------------------------------------------------------------------------------------------------------------------------------------------------------------|------------------------------------------------------------------------------------------------------------------------------------------------------------------------------------------------------------------------------------------------------------------------------------------------------------------------------------------------------------------------------------------------------------------------------------------------------------------------------------------------------------------------|----------------------------------------------------------------------------------------------------------------------------------------------------------------------------------------------------------------------------------------------------------------------------------------------------------------------------------------------------------------------------------------------------------------------------------------------------------------------------------------------------------------------------|----|---|
| 9. Mitchell-DiCenso et al. (1996), Canada | Mothers and fathers/482 | Mean (SD) Interv: 35.1 (4.5)<br>Control: 35 (4.3)<br>/ level III | Randomised, Controlled Trial | <b>Intervention: Clinical Nurse Specialist/neonatal practitioner team (CNS/NP) care.</b><br><br>Infants of intervention parents were assigned to be cared for by the Clinical nurse special/neonatal practitioner CNS/NP team during the day and by paediatric residents during the night.<br><br><b>Control:</b> Paediatric residents cared for infants of control parents around the clock. Neonatologists supervised both teams. | <b>Parent satisfaction with care</b>                                                    | During admission period and post discharge (twice)<br><br>- On 5 <sup>th</sup> day after admission (full survey)<br><br>- After discharge over the phone (only questions related to satisfaction with discharge process)<br><br>No pre-intervention parent satisfaction data available for comparison. | <b>Satisfaction questionnaire (Validated)</b><br><br>The study team developed and used the validated <i>Neonatal Index of Parent Satisfaction (NIPS)</i> questionnaire.<br><br><u>Number of questions:</u> not stated.<br><br>NIPS score range (27-189); higher scores indicating greater satisfaction with care.                                                                                                                                                                                                      | <b>No statistically significant difference between groups.</b><br><br>Interv Control p-value<br>NIPS 140 139 0.67<br>Mean<br><br>Difference in means 1.0, CI (-3.6-5.6)                                                                                                                                                                                                                                                                                                                                                    | No | 2 |
| 10. Broyles et al. (1992), USA            | Mothers /25             | Mean (SD) Control: 34 (4)<br>Interv: 33.4 (4)<br>/ level III     | Randomised Controlled Trial  | <b>Intervention: Detailed consent.</b><br><br>Mothers were given information about mechanical ventilation. Detailed risk/benefit disclosure was provided both verbally and in writing.<br><br><b>Control:</b> Mothers were given a brief verbal description about mechanical ventilation supplemented with detailed verbal and written disclosure if desired by them (flexible consent).                                            | <b>Maternal satisfaction with the information provided about mechanical ventilation</b> | During babies' admission (once)<br><br>- 24-48 hours after the intervention<br><br>No pre-intervention parent satisfaction data available for comparison.                                                                                                                                              | <b>An interview evaluating maternal satisfaction with the information provided about mechanical ventilation.</b><br><br><b>Validation:</b> A psychiatrist with a special interest in interviewing techniques was consulted in designing and standardising this assessment.<br><br>A research nurse conducted the interview, "checking" each mother against one option regarding:<br>- Amount of information: Right amount-Too much-Too little<br>- Information made coping: More Difficult-Easier-No effect-Uncertain. | This study is measuring and comparing satisfaction with two different interventions (detailed vs flexible consent process), neither of which formally represent the usual routine care for all babies (no control).<br><br><b>Small numbers. No data indicating statistical analysis conducted or evidence of statistically significant results.</b><br><br>Detailed Flexible<br>Right 75% mothers 100%<br>amount of information<br><br>Too 25% mothers<br>little information<br><br>Made 67% mothers 69%<br>coping easier | No | 3 |

231  
232  
233**Table 2. Included Prospective Cohort Studies**

| Prospective cohort studies by publication year |                                                    |                                                                      |                                                                                                                                                                 |                                                                                                                                                                                                                                                                                                                                                                                                          |                                                                                                                                                                                  |                                                                                                                                                                                                                              |                                                                                                                                                                                                                                                                                                                                                                                                                                                                                                                                                |                                                                                                                                                                                                                                                                                                                                                     |                   |                               |
|------------------------------------------------|----------------------------------------------------|----------------------------------------------------------------------|-----------------------------------------------------------------------------------------------------------------------------------------------------------------|----------------------------------------------------------------------------------------------------------------------------------------------------------------------------------------------------------------------------------------------------------------------------------------------------------------------------------------------------------------------------------------------------------|----------------------------------------------------------------------------------------------------------------------------------------------------------------------------------|------------------------------------------------------------------------------------------------------------------------------------------------------------------------------------------------------------------------------|------------------------------------------------------------------------------------------------------------------------------------------------------------------------------------------------------------------------------------------------------------------------------------------------------------------------------------------------------------------------------------------------------------------------------------------------------------------------------------------------------------------------------------------------|-----------------------------------------------------------------------------------------------------------------------------------------------------------------------------------------------------------------------------------------------------------------------------------------------------------------------------------------------------|-------------------|-------------------------------|
| Author (Date), Country                         | Parents' gender/ sample Size                       | Infant Gestation age (GA) in weeks /NICU level                       | Study design                                                                                                                                                    | Intervention                                                                                                                                                                                                                                                                                                                                                                                             | Outcome measures                                                                                                                                                                 | Timing of measurement                                                                                                                                                                                                        | Method of measurement                                                                                                                                                                                                                                                                                                                                                                                                                                                                                                                          | Results                                                                                                                                                                                                                                                                                                                                             | Parent co-design? | Improved parent satisfaction? |
| 1. De Bernardo et al (2017), Italy             | Mothers and Fathers /96                            | Mean (SD) Control: 34.2 (5.25)<br>Interv: 32.7 (5.25)<br>/ level III | Non-randomized, prospective cohort pilot study<br><br><i>Unit level effect:</i><br>Two different time periods                                                   | <b>Intervention: FCC (Family-Centered Care).</b><br><br>Parents had access to NICU for 8 hours/day. The NICU was widened and paediatric nurses taught parents procedures/practices for 10 days. Parents could observe clinical bedside rounds, hold meetings with the physicians, use the rooms and kitchen.<br><br><b>Control:</b> Parents were permitted to visit their baby in NICU for 1 hour a day. | <b>Parent satisfaction relating to 3 specific domains:</b><br><br>1. Knowledge and Understanding<br><br>2. Communication and Collaboration<br><br>3. Privacy and confidentiality | During babies' admission (once)<br><br>- At discharge (pre-FCC cohort and post-FCC cohort)<br><br>No pre-intervention parent satisfaction data available for comparison (different parent groups pre and post intervention). | <b>Satisfaction questionnaire.</b><br><br><b>Validation:</b> The authors state the survey "was designed and validated by Abdel-Latif et al". No content validity or reliability testing reported in the original paper.<br><br>9 questions<br><br>3 questions: Related to adequate and timely information about the baby's condition.<br><br>3 questions: Related to communication and collaboration with the healthcare team.<br><br>3 questions: Related to respect of patient privacy.<br><br>Likert (1 strongly disagree-5 strongly agree) | <b>7/9 individual statements in the parent satisfaction questionnaire scored higher in the FCC compared to the NFCC (statistically significant difference).</b><br><br>Example statement: "I have received adequate information about my baby's condition and management."<br><br>Interv Control<br>Median 5 (3.45-5) 4 (3-5)<br>p-value <0.05      | No                | 1                             |
| 2. Petteys et al. (2015), USA                  | Not stated/ 10 parents included in sample analysis | 24-36+ / level III                                                   | A prospective cohort design.<br><br>A feasibility study.<br><br><i>Group level effect:</i><br>Intervention/control groups<br><br>Post-intervention testing only | <b>Intervention: PC (Palliative care).</b><br><br>PC nurses provided important continuity of care for NICU infants clinically requiring PC and at least weekly verbal support of parents. The PC service also coordinated family conferences, provided or requested orders to improve infant symptom management and comfort, and addressed parental coping and self-care.                                | <b>Overall satisfaction with care received</b>                                                                                                                                   | During babies' admission (once)<br><br>- At discharge (or study closure for infants who remained hospitalised)<br><br>No pre-intervention parent satisfaction data available for comparison.                                 | <b>Satisfaction questionnaire</b><br><br>A researcher-created questionnaire based on extensive current literature review.<br><br><b>Validation:</b> Partially reported. Authors stated content validity testing took place; no information on reliability testing provided.<br><br>1 question<br><br>Likert (1 extremely dissatisfied-4 to extremely satisfied).                                                                                                                                                                               | <b>Parent satisfaction response numbers were small (n= 10), thus statistical comparison of parental satisfaction between cohorts was not possible.</b><br><br>However, 100% of responding PC parents (n= 2) reported being "extremely satisfied" with care, whereas only 50% of responding usual care parents (n= 4) reported extreme satisfaction. | No                | 3                             |

234

|                               |                                                                                               |                                                                      |                                                                                                                                        |                                                                                                                                                                                                                                                                                                                                                                                                                                                                                                                                                                                                                                                                                    |                                                                                                                                                                                                                              |                                                                                                                                                                                                                                                     |                                                                                                                                                                                                                                                                                                                                                                                                                                                                                                                                                                |                                                                                                                                                                                                                                                                                                                                                                                                     |            |          |
|-------------------------------|-----------------------------------------------------------------------------------------------|----------------------------------------------------------------------|----------------------------------------------------------------------------------------------------------------------------------------|------------------------------------------------------------------------------------------------------------------------------------------------------------------------------------------------------------------------------------------------------------------------------------------------------------------------------------------------------------------------------------------------------------------------------------------------------------------------------------------------------------------------------------------------------------------------------------------------------------------------------------------------------------------------------------|------------------------------------------------------------------------------------------------------------------------------------------------------------------------------------------------------------------------------|-----------------------------------------------------------------------------------------------------------------------------------------------------------------------------------------------------------------------------------------------------|----------------------------------------------------------------------------------------------------------------------------------------------------------------------------------------------------------------------------------------------------------------------------------------------------------------------------------------------------------------------------------------------------------------------------------------------------------------------------------------------------------------------------------------------------------------|-----------------------------------------------------------------------------------------------------------------------------------------------------------------------------------------------------------------------------------------------------------------------------------------------------------------------------------------------------------------------------------------------------|------------|----------|
| 3. Stevens et al. (2011), USA | Mothers /147. For the OPBY NICU, 58 surveys were returned. For the SFR NICU, 89 were returned | Mean (SD)<br>Control: 35 (4)<br>Interv: 34 (3)<br>/ level not stated | Cohort trial. This research was part of a large prospective evaluation.<br><br><i>Unit level effect:</i><br>Two different time periods | <b>Control:</b> Usual clinical care for infants not requiring PC.<br><br><b>Intervention: SFR (Single-family room) NICU for neonatal care.</b><br><br>Parents could visit their baby, room-in, do kangaroo care and breastfeed at any time, in individual rooms (containing bed, desk, closet, telephone, chair, refrigerator for breast-milk storage).<br><br><b>Control:</b> OPBY (Open-bay) NICU. The traditional open-bay NICU was typical of facilities built before 1980. All neonates, family members, staff, monitors, and equipment were visible for all neonates in each room. Portable partitions were placed around the incubator for breastfeeding and kangaroo care. | <b>Parent satisfaction with different elements of NICU:</b><br>- <i>Delivery</i><br>- <i>Environment</i><br>- <i>Nurses</i><br>- <i>Physicians</i><br>- <i>Discharge</i><br>- <i>Personal</i><br>- <i>Overall Assessment</i> | After babies were discharged (once)<br><br>- Mailed within 60 days of discharge of parents' infants from the NICU<br><br>No pre-intervention parent satisfaction data available for comparison (different parent groups pre and post intervention). | <b>Satisfaction questionnaire</b><br><br>A questionnaire from Press Ganey Associates was used. Also included were three questions added by the investigators.<br><br><b>Validation:</b> Partially reported. The original questionnaire was validated questionnaire but no content validity or reliability testing was reported regarding the 3 questions added by the study team.<br><br>42 questions in total (7 categories):<br>Delivery, Environment, Nurses, Physicians, Discharge, Personal, Overall Assessment.<br><br>Likert (1 very poor-5 very good). | <b>Statistically significant improvement was found for the survey categories of Environment, Overall and the Total survey.</b><br><br>Estimated numbers from report's figures as numbers not provided:<br><br><b>Median SFR OPBY p-value</b><br>Environment 4.7 3.7 <0.001<br>Overall 5 4.8 0.018<br>Total 4.7 4.5 0.045<br><br>16 items composite score for family-centered care:<br>4.4 4.0 0.017 | <b>Yes</b> | <b>1</b> |
|-------------------------------|-----------------------------------------------------------------------------------------------|----------------------------------------------------------------------|----------------------------------------------------------------------------------------------------------------------------------------|------------------------------------------------------------------------------------------------------------------------------------------------------------------------------------------------------------------------------------------------------------------------------------------------------------------------------------------------------------------------------------------------------------------------------------------------------------------------------------------------------------------------------------------------------------------------------------------------------------------------------------------------------------------------------------|------------------------------------------------------------------------------------------------------------------------------------------------------------------------------------------------------------------------------|-----------------------------------------------------------------------------------------------------------------------------------------------------------------------------------------------------------------------------------------------------|----------------------------------------------------------------------------------------------------------------------------------------------------------------------------------------------------------------------------------------------------------------------------------------------------------------------------------------------------------------------------------------------------------------------------------------------------------------------------------------------------------------------------------------------------------------|-----------------------------------------------------------------------------------------------------------------------------------------------------------------------------------------------------------------------------------------------------------------------------------------------------------------------------------------------------------------------------------------------------|------------|----------|

235

236 **Table 3.** Included “Other” non-Randomised Controlled Trials (non-RCT)

| “Other” Non-Randomised controlled trials (Non-RCT) by publication year |                             |                                                |                                                                                                                                                   |                                                                                                                                                                                                                                                                                                                                                                                                                                                                                                                                                         |                              |                                                                                                 |                                                                                                                                                                                                                                                                                                   |                                                                                                                                                                                                                                                                                                                                                                                                                                                                                                                                                                                          |                   |                               |
|------------------------------------------------------------------------|-----------------------------|------------------------------------------------|---------------------------------------------------------------------------------------------------------------------------------------------------|---------------------------------------------------------------------------------------------------------------------------------------------------------------------------------------------------------------------------------------------------------------------------------------------------------------------------------------------------------------------------------------------------------------------------------------------------------------------------------------------------------------------------------------------------------|------------------------------|-------------------------------------------------------------------------------------------------|---------------------------------------------------------------------------------------------------------------------------------------------------------------------------------------------------------------------------------------------------------------------------------------------------|------------------------------------------------------------------------------------------------------------------------------------------------------------------------------------------------------------------------------------------------------------------------------------------------------------------------------------------------------------------------------------------------------------------------------------------------------------------------------------------------------------------------------------------------------------------------------------------|-------------------|-------------------------------|
| Author (Date), Country                                                 | Parents' gender/sample Size | Infant Gestation age (GA) in weeks /NICU level | Study design                                                                                                                                      | Intervention                                                                                                                                                                                                                                                                                                                                                                                                                                                                                                                                            | Outcome measures             | Timing of measurement                                                                           | Method of measurement                                                                                                                                                                                                                                                                             | Results                                                                                                                                                                                                                                                                                                                                                                                                                                                                                                                                                                                  | Parent co-design? | Improved parent satisfaction? |
| 1. Kadivar et al. (2017), Iran                                         | Mothers /68                 | <=30 – 36 / level not stated                   | Non-randomised, Convenience sampling.<br><br><i>Group level effect:</i><br>Intervention/control groups.<br><br>Pre and post-intervention testing. | <b>Intervention: Internet-based education.</b><br><br>Mothers used an educational website set up by the research team (files and clips). Mothers could visit the website from 5:00-6:00 pm for 10 days. They were also allowed to use the website outside of the above hours and to report the duration of using the website to the researcher. Mothers had to use the website at least 3 times during 10 days, each time for at least 30 min.<br><br><b>Control:</b> Mothers in the control group received the routine education provided in the NICU. | <b>Maternal satisfaction</b> | During babies' admission (twice)<br><br>- Day 1 of intervention<br><br>- Day 10 of intervention | <b>Satisfaction questionnaire (Validated)</b><br><br>The “What Being The Parent of a Baby is Like-Revised” Questionnaire (WBRL- Revised) was used. The original English version by Pridham and Chang was translated to Persian.<br><br>11 questions<br><br>Total satisfaction score range (11–99) | There was a significant difference in the mean score of satisfaction between cases and controls while the mean score of satisfaction increased in both groups.<br><br><b>Comparison of the mean score between the two groups showed that the level of satisfaction was significantly higher in the case group versus the control group.</b><br><br><b>Interv Control</b><br><b>before intervention</b><br>Mean 81.62(13.50) 85.71(9.46)<br><b>(SD)</b><br><b>p-value</b> 0.993<br><br><b>after intervention</b><br>Mean 93.88 (5.38) 90.12 (7.78)<br><b>(SD)</b><br><b>p-value</b> 0.024 | <b>No</b>         | <b>1</b>                      |

237



|                                 |                                                  |                                                                             |                                                                                                                                                     |                                                                                                                                                                                                                                                                                                                                                                                                                                                                                                                                                                                                                                                                     |                                                                                                                                                                                                  |                                                                                                                                                                                                               |                                                                                                                                                                                                                                                                                                                                                                                                                                                                                                                                                                                                                                                                                                                                                                                                                                                           |                                                                                                                                                                                                                                                                                                                                                                                                                                                                                                                                                                                                                                                                                                                                                                                                                                                                                                                                                                                                       |    |   |
|---------------------------------|--------------------------------------------------|-----------------------------------------------------------------------------|-----------------------------------------------------------------------------------------------------------------------------------------------------|---------------------------------------------------------------------------------------------------------------------------------------------------------------------------------------------------------------------------------------------------------------------------------------------------------------------------------------------------------------------------------------------------------------------------------------------------------------------------------------------------------------------------------------------------------------------------------------------------------------------------------------------------------------------|--------------------------------------------------------------------------------------------------------------------------------------------------------------------------------------------------|---------------------------------------------------------------------------------------------------------------------------------------------------------------------------------------------------------------|-----------------------------------------------------------------------------------------------------------------------------------------------------------------------------------------------------------------------------------------------------------------------------------------------------------------------------------------------------------------------------------------------------------------------------------------------------------------------------------------------------------------------------------------------------------------------------------------------------------------------------------------------------------------------------------------------------------------------------------------------------------------------------------------------------------------------------------------------------------|-------------------------------------------------------------------------------------------------------------------------------------------------------------------------------------------------------------------------------------------------------------------------------------------------------------------------------------------------------------------------------------------------------------------------------------------------------------------------------------------------------------------------------------------------------------------------------------------------------------------------------------------------------------------------------------------------------------------------------------------------------------------------------------------------------------------------------------------------------------------------------------------------------------------------------------------------------------------------------------------------------|----|---|
| 2. Kadivar et al. (2017), Iran  | Mothers /70                                      | Mean (SD)<br>Control 31.6 (2.4)<br>Interv: 32.9 (3.1)<br>/ level not stated | Non-randomised, Convenience sampling.<br><br><i>Unit level effect:</i><br>Two different time periods                                                | <b>Intervention: Narrative writing.</b><br><br>Mothers did narrative writing at least 3 times until the 10th day of admission.<br><br><b>Control:</b> Mothers in the control group received the routine NICU treatment and care.                                                                                                                                                                                                                                                                                                                                                                                                                                    | <b>Mothers' satisfaction with medical care provided by physicians, medical students, and nurses during neonatal admission to the NICU</b>                                                        | During babies' admission (twice)<br><br>- Day 3 of intervention<br><br>- Day 10 of intervention                                                                                                               | <b>Satisfaction questionnaire (Validated)</b><br><br>The <i>NIPS questionnaire</i> by Mitchell et al was used and translated to Persian.<br><br>24 questions (Likert scale)<br><br>Likert (1 always or not satisfied-7 never or completely satisfied). A higher score indicates more satisfaction.                                                                                                                                                                                                                                                                                                                                                                                                                                                                                                                                                        | <b>The satisfaction level of the mothers in the intervention group increased significantly during the study.</b><br><br>The results of independent t test showed a significant difference in the satisfaction changes of the mothers on the 3rd and 10th day of NICU admission between intervention and control groups, indicating the effectiveness of narrative writing.<br><br>The results of paired t-test also showed a significant difference in the mean satisfaction level of the mothers between the 3rd and the 10th day in the intervention group.                                                                                                                                                                                                                                                                                                                                                                                                                                         | No | 1 |
| 3. Garingo et al. (2016), USA   | Not stated /9                                    | 23-39 / level III                                                           | Non-randomised, Convenience sampling.<br><br><i>Group level effect:</i><br>Intervention/ control groups<br><br>Post-intervention group testing only | <b>Intervention: Tele-rounding.</b><br><br>Infants of intervention parents were cared for by an OFFSN (off site neonatologist) who was present via a remote-controlled robot. The OFFSN assessed infants via the robot's integrated stethoscope, with assistance from the nursing staff. During routine hours the OFFSN was called to discuss any issues with the patient. Emergencies/out of hours were covered by an ONSN (on site neonatologist).<br><br><b>Control:</b> Infants of control parents received ONSN care. The attending neonatologist made daily patient rounds with the NICU team. After patient rounds, the NICU staff, under the supervision of | <b>Satisfaction with telemedicine</b>                                                                                                                                                            | During babies' admission (once)<br><br>- At the time of discharge<br><br>No pre-intervention parent satisfaction data available for comparison.                                                               | <b>Satisfaction questionnaire</b><br><br><b>Validation:</b> No content validity or reliability testing reported.<br><br><b>Number of questions:</b> not stated.<br><br>Likert (1 excellent-5 very poor).                                                                                                                                                                                                                                                                                                                                                                                                                                                                                                                                                                                                                                                  | <b>Only the intervention group was assessed and only post-intervention.</b><br><br>The authors reported that the parents surveyed were "satisfied with their experience. 100% responded that they felt comfortable talking to the OFFSN on the mobile robot and would allow their infant or themselves to be cared for by a physician via telemedicine in the future."                                                                                                                                                                                                                                                                                                                                                                                                                                                                                                                                                                                                                                | No | 4 |
| 4. Globus et al. (2016), Israel | Mothers and fathers /Total surveys returned: 178 | ~40% in each group <32 / level III                                          | Non-randomised, Convenience sampling.<br><br><i>Unit level effect:</i><br>Two different time periods                                                | <b>Intervention: SMS-Short Message Services Implementation.</b><br><br>Parents were updated daily regarding the health status of their infant via SMS (short-message-services) from the Electronic Patient Record. All SMS messages were sent at 09:00am, including one-sentence sections with updated information (e.g. location of the infant's crib and current weight).<br>Information regarding acute events/deterioration of the infant's medical condition was not included in the SMS, but was delivered personally to the parents in real time.<br><br><b>Control:</b> Routine care pre-SMS implementation.                                                | <b>1. Parent satisfaction related to parent communication with the medical staff</b><br><br><b>2. Overall parent satisfaction with treatment and staff attitudes throughout hospitalisation.</b> | During babies' admission (once)<br><br>- pre-SMS cohort and post-SMS cohort<br><br>No pre-intervention parent satisfaction data available for comparison (different parent groups pre and post intervention). | <b>Satisfaction questionnaire</b><br><br>The "Parents' attitudes regarding their experience during their infants' hospitalisation in the NICU" questionnaire was used, as well as selected items from a literature review of similar questionnaires, including that by York Hospital and by Conner and Nelson.<br><br><b>Validation:</b> No content validity or reliability testing reported.<br><br>Selected items related to four aspects of the NICU experience. 2 out of 4 directly assessed parent satisfaction:<br><br>1. Parental assessment of their communication with the medical staff.<br><br>Likert scale (1 do not agree at all-5 strongly agree)<br><br>2. Overall satisfaction with treatment and staff attitudes throughout hospitalisation.<br><br>Visual analog scale (scores range 0-10). Higher scores reflect greater satisfaction. | Overall, in both periods, parents expressed a high degree of satisfaction regarding the medical treatment, the information given and the communication with the medical staff. Overall satisfaction with treatment and with staff attitudes throughout hospitalisation was slightly greater in the post-SMS cohort but did not reach statistical significance.<br><br><b>In the post-SMS cohort, a statistically significant improvement was noted regarding physician availability and patience, parental feelings of comfort in approaching the physicians and nurses, and regularly receiving information regarding the infants' medical status from the physicians.</b><br><br><b>Post SMS Pre SMS Mean (SD)</b> 4.1 (1.0) 3.7 (1.3)<br><b>p-value</b> 0.02<br><b>Specific question:</b> "I was pleased with the frequency with which I received information regarding my infant".<br><br>Although improvement in all other categories was documented, it did not reach statistical significance. | No | 1 |

238

239

240

241

242

|                                       |                                                                              |                                    |                                                                                                                                                 |                                                                                                                                                                                                                                                                                                                                                                                                                                                                                                                                                                    |                                                                                        |                                                                                                                                                                                                           |                                                                                                                                                                                                                                                                                                                                                                                                              |                                                                                                                                                                                                                                                                                                                                                                                                                                                                                                                                                                                                     |      |   |
|---------------------------------------|------------------------------------------------------------------------------|------------------------------------|-------------------------------------------------------------------------------------------------------------------------------------------------|--------------------------------------------------------------------------------------------------------------------------------------------------------------------------------------------------------------------------------------------------------------------------------------------------------------------------------------------------------------------------------------------------------------------------------------------------------------------------------------------------------------------------------------------------------------------|----------------------------------------------------------------------------------------|-----------------------------------------------------------------------------------------------------------------------------------------------------------------------------------------------------------|--------------------------------------------------------------------------------------------------------------------------------------------------------------------------------------------------------------------------------------------------------------------------------------------------------------------------------------------------------------------------------------------------------------|-----------------------------------------------------------------------------------------------------------------------------------------------------------------------------------------------------------------------------------------------------------------------------------------------------------------------------------------------------------------------------------------------------------------------------------------------------------------------------------------------------------------------------------------------------------------------------------------------------|------|---|
| 5. Kazemian et al. (2016), Iran       | Mothers /220 newborns (assumed 220 mothers)                                  | >37 / level not stated             | Non-randomised, Convenience sampling.<br><br><i>Group level effect:</i> Intervention/control groups<br><br>Post-intervention testing only       | <b>Intervention: Rooming-in care.</b><br><br>Mothers and babies were admitted to a different atmosphere to the routine care. This facilitated the mothers and neonates with separate beds along with phototherapy devices and nursing clinical supervision.<br><br><b>Control:</b> The routine care practiced in this neonatal unit supported partial stay of mothers beside their neonates, while sitting on chairs; however, most of the time the mother-infant dyad was separated.                                                                              | <b>Maternal satisfaction with the neonatal care services and hospital stay comfort</b> | During babies' admission (once)<br><br>- Not stated exactly when<br><br>No pre-intervention parent satisfaction data available for comparison.                                                            | <i>Satisfaction questionnaire</i><br><br><b>Validation:</b> No content validity or reliability testing reported.<br><br>The authors state, "a validated self-made questionnaire was employed, which was filled in by some trained midwives." No further information on validation processes, number of questions or name of the questionnaire was provided.<br><br>Likert (5 very satisfied-1 dissatisfied). | <b>The level of satisfaction was significantly higher in the intervention group, compared to that in the control group.</b><br><br>Satisfaction %<br><br>Interv 26.6<br>Control 18.8<br><br>p-value 0.027                                                                                                                                                                                                                                                                                                                                                                                           | No   | 1 |
| 6. Van de Vijver and Evans (2015), UK | Not stated /105                                                              | Not stated / not stated            | Non-randomised, Convenience sampling.<br><br><i>Unit level effect:</i> Three different time periods                                             | <b>Intervention: Baby diary.</b><br><br>Each parent received a communication diary on their infant's admission to the unit. Staff wrote-in infant status updates and kept an infant interaction log with parents. Parents wrote in memories and questions for staff to address during face-to-face communication.<br><br><b>Control:</b> Routine care, before implementation of the diaries.                                                                                                                                                                       | <b>Satisfaction with communication from neonatal staff</b>                             | During babies' admission (three times)<br><br>- On the day of babies' discharge at study baseline<br><br>- On the day of babies' discharge at 1 month<br><br>On the day of babies' discharge at 15 months | <i>Satisfaction questionnaire</i><br><br>The study team designed a questionnaire, based on the Department of Health and the National Institute for Health and Care Excellence (NICE) quality standards for specialist neonatal care.<br><br><b>Validation:</b> No content validity or reliability testing reported.<br><br>5 questions ("yes or no")                                                         | <b>Small numbers. No data indicating statistical analysis conducted or evidence of statistically significant results.</b><br><br>"I was receiving regular communication from staff"<br>94% - 1 month post diary cohort<br>93% - 15 months post diary cohort<br>77% - pre diary cohort<br><br>"My questions and concerns were being addressed"<br>100% - 1 month post diary cohort<br>93% - 15 months post diary cohort<br>91% - pre diary cohort<br><br>"I feel more involved in my baby's care"<br>92% - 1 month post diary cohort<br>100% - 15 months post diary cohort<br>88% - pre diary cohort | Yes. | 3 |
| 7. Voos and Park. (2014), USA         | Not stated / 62                                                              | Not stated / level III             | Non-randomised, Convenience sampling.<br><br><i>Unit level effect:</i> Two different time periods                                               | <b>Intervention: OU (Open Unit) policy.</b><br><br>Parents were allowed access to their baby 24 hours a day, 7 days a week.<br><br><b>Control:</b> Parents pre-OU implementation received routine care. The unit was closed to parents during nurse change of shift in mornings and evenings.                                                                                                                                                                                                                                                                      | <b>Parent satisfaction with how much time parents get to spend with their baby</b>     | After babies were discharged (once)<br><br>- After pre-OU parents were discharged<br><br>- After post-OU parents were discharged                                                                          | <i>Single question (From a validated questionnaire)</i><br><br>The question "Did you get to spend as much time as you wanted with your baby?" was used from the NRC (National Research Corporation) Ficker parent survey.<br><br>1 question ("yes or no")                                                                                                                                                    | <b>Small numbers. No data indicating statistical analysis conducted or evidence of statistically significant results.</b><br><br>"Did you get to spend as much time as you wanted with your baby?" Yes.                                                                                                                                                                                                                                                                                                                                                                                             | Yes. | 3 |
| 8. Segre et al. (2013), USA           | Mothers /23                                                                  | Mean (SD) 31.57 (5.30) / level III | Non-Randomised, Convenience sampling.<br><br><i>Group level effect:</i> Intervention/control groups<br><br>Post-intervention group testing only | <b>Intervention: (LV) Listening visits.</b><br><br>Mothers met with the LV provider for up to six 50-min LV sessions, conducted in a private hospital, every 2-3 days, within 1-month. Visits entailed greeting, debriefing, updating on current issues, working an agenda through listening and problem solving, and providing closure through summary.<br><br><b>Control:</b> Women who did not meet the specific criteria (e.g. minimum score on depression scale) were not invited to join the treatment trial and received routine NICU care/support instead. | <b>Satisfaction with the treatment and the outcome.</b>                                | During babies' admission (once)<br><br>- Not stated exactly when<br><br>No pre-intervention parent satisfaction data available for comparison.                                                            | <i>Satisfaction questionnaire</i><br><br>The Client Satisfaction Questionnaire was used.<br><br><b>Validation:</b> Partially reported. Authors stated reliability testing took place; no information on content validity provided.<br><br>8 questions.<br><br><b>Format of questions:</b> not stated                                                                                                         | <b>Only the intervention group was assessed and only post-intervention.</b><br><br>The authors reported:<br><br>"The majority of women who received LVs were highly satisfied with the intervention".<br><br>"The average score for the Client Satisfaction Questionnaire was 29.91, comparable to levels of satisfaction reported by clients receiving depression treatment from a mental health professional."<br><br>"91.3% of our participants rated the quality of help they received as excellent."                                                                                           | No   | 4 |
| 9. Palma et al. (2012), USA           | Not stated / 26 families returned the survey containing the satisf. measure) | Not stated / level II              | Non-randomised, Convenience sampling.<br><br><i>Unit level effect:</i> Two different time periods                                               | <b>Intervention: YBDU (Your Baby's Daily Update). A daily parent update letter generated from the Electronic Medical Record (EMR).</b><br><br>Parents were given daily YBDU reports, printed automatically from the EMR. The YBDU included information about an infant's status during the past 24 hours and a hand-written update by the infant's care provider.<br><br><b>Control:</b> Parents received routine care and usual verbal updates (6 months pre-adoption of YBDU).                                                                                   | <b>Satisfaction with YBDU</b>                                                          | During babies' admission (once)<br><br>- Not stated exactly when<br><br>No pre-intervention parent satisfaction data available for comparison (different parent groups pre and post intervention).        | <i>Satisfaction questionnaire</i><br><br>A questionnaire including items regarding adoption of and satisfaction with YBDU was used.<br><br><b>Validation:</b> No content validity or reliability testing reported.<br><br><b>Number and format of questions:</b> not stated.                                                                                                                                 | <b>Only the intervention group was assessed and only post-intervention.</b><br><br>The authors reported:<br><br>"When asked to rate the statement "I like receiving Your Baby's Daily Update", 96% of families who used YBDU as an information source responded with the highest rating, "always"."                                                                                                                                                                                                                                                                                                 | No   | 4 |
| 10. Voos et al.                       | Not stated /28                                                               | Not stated / level not             | Non-randomised.                                                                                                                                 | <b>Intervention: Family-centered rounds</b>                                                                                                                                                                                                                                                                                                                                                                                                                                                                                                                        | <b>Global satisfaction with</b>                                                        | During babies' admission (twice)                                                                                                                                                                          | <i>Satisfaction questionnaire (Validated)</i>                                                                                                                                                                                                                                                                                                                                                                | <b>A subset of MIPS items related to communication</b>                                                                                                                                                                                                                                                                                                                                                                                                                                                                                                                                              | No   | 1 |

243

244

|                                     |                                                                      |                                                                                                               |                                                                                                                                                                                             |                                                                                                                                                                                                                                                                                                                                                                                                                                                                                                                                                                                                                                                                                            |                                                                                                                                                                                                                                                                                                          |                                                                                                                                                               |                                                                                                                                                                                                                                                                                                                                                           |                                                                                                                                                                                                                                                                                                                                                                                                                                                                                                                                                                                                                                                                                                                                                                                           |    |   |
|-------------------------------------|----------------------------------------------------------------------|---------------------------------------------------------------------------------------------------------------|---------------------------------------------------------------------------------------------------------------------------------------------------------------------------------------------|--------------------------------------------------------------------------------------------------------------------------------------------------------------------------------------------------------------------------------------------------------------------------------------------------------------------------------------------------------------------------------------------------------------------------------------------------------------------------------------------------------------------------------------------------------------------------------------------------------------------------------------------------------------------------------------------|----------------------------------------------------------------------------------------------------------------------------------------------------------------------------------------------------------------------------------------------------------------------------------------------------------|---------------------------------------------------------------------------------------------------------------------------------------------------------------|-----------------------------------------------------------------------------------------------------------------------------------------------------------------------------------------------------------------------------------------------------------------------------------------------------------------------------------------------------------|-------------------------------------------------------------------------------------------------------------------------------------------------------------------------------------------------------------------------------------------------------------------------------------------------------------------------------------------------------------------------------------------------------------------------------------------------------------------------------------------------------------------------------------------------------------------------------------------------------------------------------------------------------------------------------------------------------------------------------------------------------------------------------------------|----|---|
| (2011), USA                         |                                                                      | stated                                                                                                        | Convenience sampling.<br><br><i>Unit level effect:</i><br>Two different time periods                                                                                                        | <b>(FCRs).</b><br><br>Parents were invited to attend rounds and choose their level of involvement (attend every day/not at all/periodically). For confidentiality concerns, parents were asked to step outside while rounds of others' infants took place. The staff augmented FCRs by meeting with parents again after rounds if needed.<br><br><b>Control:</b> Parents received routine care. Prior to FCR implementation parents were asked to leave the unit during rounds.                                                                                                                                                                                                            | <b>the NICU experience</b>                                                                                                                                                                                                                                                                               | - Prior to FCR<br><br>- 6 months after starting FCR                                                                                                           | <b>The NIPS questionnaire.</b><br><br>24 questions: looking at satisfaction in different areas of the NICU (medical caregivers, communication, tests, and procedures).<br><br>Likert scale (1-7 points).                                                                                                                                                  | <b>(i.e. being kept informed as to changes in the infant's condition, meeting with physicians, and information about long-term expectations) yielded a significant increase from pre to post FCR scores.</b><br><br>post-FCR pre-FCR p-value<br>NIPS 5.5 4.4 <0.01 score<br><br>The average score on the NIPS did not change significantly.                                                                                                                                                                                                                                                                                                                                                                                                                                               |    |   |
| 11. Weiss et al. (2010), USA        | Mothers /84                                                          | Mean (SD)<br><br>Pre-interv group: 32 (4.4)<br><br>Post-interv group: 32 (9)<br><br>/ level III               | Non-randomised, Convenience sampling<br><br><i>Unit level effect:</i><br>Two different time periods                                                                                         | <b>Intervention:</b><br><b>An intervention to increase PMP (Principal Medical Providers) availability and communication frequency.</b><br><br>(1) A brief education module for PMPs was introduced (2) parents received a contact card with PMP names, job descriptions and contact information (3) a poster of the faces, names and titles of the PMPs was placed at NICU entrance.<br><br><b>Control:</b> Parents received routine care in the pre-intervention cohort, without the above.                                                                                                                                                                                               | <b>Parent satisfaction with physician and nurse practitioner communication</b>                                                                                                                                                                                                                           | During babies' admission (twice)<br><br>- Pre-intervention<br><br>- Post-intervention                                                                         | <b>Satisfaction Questionnaire (Validated)</b><br><br>A pilot survey written by Press Ganey and the Picker Institute was used and revised based on parent responses.<br><br>6 open-ended questions (Quantity of communication)<br><br>6 Likert scale questions (range questions (Availability, understanding, reciprocity, empathy, overall satisfaction)) | <b>Overall satisfaction, based on the ordinal analysis of the five-point Likert scale, was significantly higher after the intervention (P&lt;0.01).</b><br><br><b>Overall satisfaction, dichotomised into a satisfied subgroup and a dissatisfied subgroup for each cohort, was also significantly increased after the intervention.</b><br><br>post-interv pre-interv satisfied/ Somewhat satisfied<br>Very 97%(32/33)/74%(37/50)<br>Somewhat satisfied<br>p-value <0.01                                                                                                                                                                                                                                                                                                                 | No | 1 |
| 12. Foster et al. (2008), Australia | Mothers and fathers /93<br><br>5 Special Care Nurseries              | Mean (SD)<br>Headbox: 36.5 (2.6)<br><br>CPAP: 36 (3)<br><br>/level I                                          | Non-randomised, Convenience sampling<br><br><i>Group level effect:</i><br>Intervention 1/ intervention 2 groups                                                                             | <b>Intervention 1: Infants received headbox oxygen treatment for respiratory distress.</b><br><br><b>Intervention 2: Infants received continuous oxygen positive airway pressure (CPAP) treatment for respiratory distress.</b>                                                                                                                                                                                                                                                                                                                                                                                                                                                            | <b>Satisfaction with treatment (i.e. headbox oxygen or CPAP)</b>                                                                                                                                                                                                                                         | During babies' admission (once)<br><br>- Within 5 days of the babies' admission<br><br>No pre-intervention parent satisfaction data available for comparison. | <b>Single question</b><br><br><b>Validation:</b> No content validity or reliability testing reported.<br><br>1 likert scale question (1 not at all satisfied-5 extremely satisfied).                                                                                                                                                                      | <b>Parents with babies receiving CPAP rated their satisfaction with the baby's treatment statistically significantly higher than the headbox group mean rating.</b><br><br>Headbox CPAP<br>Mean 3.71 (1.51) 4.51 (0.79) (SD)<br>p-value 0.001                                                                                                                                                                                                                                                                                                                                                                                                                                                                                                                                             | No | 1 |
|                                     |                                                                      |                                                                                                               | Post intervention testing only                                                                                                                                                              |                                                                                                                                                                                                                                                                                                                                                                                                                                                                                                                                                                                                                                                                                            |                                                                                                                                                                                                                                                                                                          |                                                                                                                                                               |                                                                                                                                                                                                                                                                                                                                                           | The CPAP group averaged between very and extremely satisfied compared with parents of babies receiving headbox, who averaged between satisfied and very satisfied ratings.                                                                                                                                                                                                                                                                                                                                                                                                                                                                                                                                                                                                                |    |   |
| 13. Byers et al. (2006), USA        | Only mothers reported /35                                            | Preterm infants<br><br>Mean (SD)<br><br>Control: 28.9 (3.44)<br><br>Interv: 28.6 (3.37)<br><br>/ level II/III | For the outcome of parent satisfaction:<br><br>Non-randomised, Convenience sampling<br><br><i>Group level effect:</i><br>Intervention/ control groups<br><br>Post-intervention testing only | <b>Intervention: Infants received individualised, developmentally supportive family-centered care.</b><br><br>Infants received care within the framework and philosophy of individualised, developmentally supportive family-centered interventions.<br><br><b>Control:</b> Infants received the traditional NICU standard of care.                                                                                                                                                                                                                                                                                                                                                        | <b>Parent satisfaction relating to:</b><br>- parental perceptions of staff caring<br>- education received<br>- preparation for the parental role<br>- overall satisfaction with the NICU experience                                                                                                      | During babies' admission (once)<br><br>- On the day before discharge<br><br>No pre-intervention parent satisfaction data available for comparison.            | <b>Satisfaction questionnaire</b><br><br>The NICU's parental satisfaction tool was used.<br><br><b>Validation:</b> Partially reported. Authors stated content validity testing took place, but "because of the disparate nature of the items, survey reliability was not assessed".<br><br>11 questions<br><br>Likert scale (1-5 strongly agree)          | <b>Independent t-test analysis of parent satisfaction/perception scores showed no significant difference between groups.</b><br><br>Example statement: "I was satisfied with the car my baby and I received in the NICU"<br><br>Interv Control<br>Mean 4.94(0.23) 4.71(0.47) (SD)<br>p-value 0.064<br><br>Both groups reported very high satisfaction with their NICU experience (4.4-5.0)                                                                                                                                                                                                                                                                                                                                                                                                | No | 2 |
| 14. Mills et al. (2006), USA        | Not stated/<br>not stated<br><br>Parents of infants from 6 hospitals | Not stated / level not stated                                                                                 | Implementation project<br><br>Plan Do Study Act (PDSA) quality improvement testing                                                                                                          | <b>Intervention: 5 potentially better practices (PBPs) in the area of discharge planning.</b><br><br>The project team iteratively implemented 5 PBPs:<br>1. Created an easy-to-use, easy-to-access discharge planning tool kit.<br>2. Restructured communication tools and processes to reflect a "plan for the day, the stay, and the way" to discharge.<br>3. Maximised the impact and use of caregiver educational tools, and updated materials and delivery systems for caregiver education.<br>4. Used various continuous quality improvement tools and processes to ensure parent/caregiver and staff satisfaction.<br>5. Analysed and enhanced interactions with and transfers into | <b>General satisfaction</b><br>- with care<br>- parents' feelings about preparedness for discharge<br>- ability and confidence in feeding<br>- familiarity with their infant<br>- feeling like a parent<br>- participation in care<br>- adequacy of information from staff about medical and care issues | During babies' admission (4 times)<br><br>- Not reported exactly when                                                                                         | <b>Satisfaction questionnaire</b><br><br>The Internet-based parent satisfaction survey "howyourbaby.com" that was developed especially for this NICU population was used.<br><br><b>Validation:</b> No content validity or reliability testing reported.<br><br><b>Number and format of questions:</b> not stated.                                        | Through multiple rapid-cycle projects, the project's collaborative group made changes within the 5 PBP plans.<br><br><b>Parent satisfaction measures were used to longitudinally monitor the changes made, rather than make direct group comparison. No data indicating statistical analysis conducted or evidence of statistically significant results.</b><br><br>Parent satisfaction survey results (all centers combined) were high across 4 measurement quartiles. No specific interquartile analysis was reported.<br><br>Parent readiness for discharge was high at the beginning and throughout the collaborative. Parents' receiving "just the right amount of information" regarding car seat trials and safe sleep demonstrated some variability throughout the collaborative. | No | 3 |

245

246

|                                             |                                                                                                             |                                                                                   |                                                                                                                                                                                                                                                                                                                                                             |                                                                                                                                                                                                                                                                                                                                                                                                                                                                                                                                                                                  |                                                                                                                                                                                                                                                                                                                                         |                                                                                                                                                                                                   |                                                                                                                                                                                                                                                                                                                                                                                                                                                                                                                                                                                                                                                                                                                                                                                                                                                                                                                                                                                                                                                                                                                              |                                                                                                                                                                                                                                                                                                                                                                                                                                                                                                                                                                                                |    |   |
|---------------------------------------------|-------------------------------------------------------------------------------------------------------------|-----------------------------------------------------------------------------------|-------------------------------------------------------------------------------------------------------------------------------------------------------------------------------------------------------------------------------------------------------------------------------------------------------------------------------------------------------------|----------------------------------------------------------------------------------------------------------------------------------------------------------------------------------------------------------------------------------------------------------------------------------------------------------------------------------------------------------------------------------------------------------------------------------------------------------------------------------------------------------------------------------------------------------------------------------|-----------------------------------------------------------------------------------------------------------------------------------------------------------------------------------------------------------------------------------------------------------------------------------------------------------------------------------------|---------------------------------------------------------------------------------------------------------------------------------------------------------------------------------------------------|------------------------------------------------------------------------------------------------------------------------------------------------------------------------------------------------------------------------------------------------------------------------------------------------------------------------------------------------------------------------------------------------------------------------------------------------------------------------------------------------------------------------------------------------------------------------------------------------------------------------------------------------------------------------------------------------------------------------------------------------------------------------------------------------------------------------------------------------------------------------------------------------------------------------------------------------------------------------------------------------------------------------------------------------------------------------------------------------------------------------------|------------------------------------------------------------------------------------------------------------------------------------------------------------------------------------------------------------------------------------------------------------------------------------------------------------------------------------------------------------------------------------------------------------------------------------------------------------------------------------------------------------------------------------------------------------------------------------------------|----|---|
|                                             |                                                                                                             |                                                                                   |                                                                                                                                                                                                                                                                                                                                                             | <p>the community.</p> <p><b>Control:</b> N/A. No discrete control group. PDSA quality improvement methodology was applied to parent participants.</p>                                                                                                                                                                                                                                                                                                                                                                                                                            |                                                                                                                                                                                                                                                                                                                                         |                                                                                                                                                                                                   |                                                                                                                                                                                                                                                                                                                                                                                                                                                                                                                                                                                                                                                                                                                                                                                                                                                                                                                                                                                                                                                                                                                              |                                                                                                                                                                                                                                                                                                                                                                                                                                                                                                                                                                                                |    |   |
| 15. Wielenga et al. (2006), The Netherlands | Mothers and fathers / 46                                                                                    | Mean (SD)<br>Control: 28.5 (26.0-29.9)<br>Interv: 28.3 (25.6-29.9)<br>/ level III | <p>Non-randomised, Convenience sampling</p> <p><b>Unit level effect:</b><br/>Two different time periods</p>                                                                                                                                                                                                                                                 | <p><b>Intervention: The Newborn Individualised Developmental Care and Assessment Program (NIDCAP).</b></p> <p>Infants received care according to NIDCAP principles and parents were taught how to provide it. Caregiving plans were designed based on the infant's current developmental stage, medical condition and family needs. Caregivers learnt to watch sensitively and note the infant's reactions to different types of handling and care, making continuous adjustments.</p> <p><b>Control:</b> Infants received traditional neonatal care practiced at that time.</p> | <p><b>Parent satisfaction relating to:</b><br/>-Overall rating<br/>-Care of the baby<br/>-Communication with staff<br/>-Involvement in care<br/>-Being prepared<br/>-Being a parent<br/>-Being near your baby<br/>-Total score</p>                                                                                                      | <p>After babies were discharged (on day of discharge/ transfer)</p> <ul style="list-style-type: none"> <li>- Pre NIDCAP cohort</li> <li>- Post NIDCAP cohort</li> </ul>                           | <p><b>Satisfaction questionnaire (Validated)</b></p> <p>The NICU-PSF was used and translated from English to Dutch.</p> <p>62 questions</p> <p>Closed and open-ended questions.</p> <p>Different rating scales used (5-point rating scale from "extremely satisfied" to "not at all satisfied" or "excellent" to "poor").</p> <p>Total score range (50-243 points)</p>                                                                                                                                                                                                                                                                                                                                                                                                                                                                                                                                                                                                                                                                                                                                                       | <p><b>The intervention group's mean total score was significantly higher than the control.</b></p> <p><b>Interv Control</b><br/>Mean (SD) 185.67(17.74) 174.04(20.98)<br/>p-value 0.041</p> <p>Almost all separate concepts showed an increase in their mean scores. The concept of "being a parent" had a slightly lower mean score (9.39, SD = 1.73) in the intervention group than in the control group (9.78, SD = 2.09).</p> <p><b>The concept of "preparedness" showed statistically significant difference.</b></p> <p><b>Interv Control</b><br/>Mean 16.38 13.83<br/>p-value 0.038</p> | No | 1 |
| 16. Penticuff and Arheart. (2005), USA      | Dyads (both parents or mother with her support person)/ 122 mothers<br>Results based only on mothers' data. | Not stated / Level III                                                            | <p><b>A repeated measures design</b></p> <ul style="list-style-type: none"> <li>- First 2 years (control group data collection)</li> <li>- Year 3 (staff training)</li> <li>- Year 4 (implementing the intervention)</li> <li>- Year 5 (collecting data from the intervention group)</li> </ul> <p><b>Unit level effect:</b> Two different time periods</p> | <p><b>Intervention: The Newborn Individualised IPC- CPM Intervention (Infant Progress Chart) - (Care Planning Meetings).</b></p> <p>Both the mother and father (or the mother and her designated support person) were shown how to use the Infant Progress Chart and attended 3 Care Planning Meetings (with neonatologists/Neonatal Nurse Practitioners).</p> <p><b>Control:</b> During the control phase, professionals carried out usual communication and interaction with control group parents.</p>                                                                        | <p><b>Satisfaction with participation in decision making was measured by 5 collaboration indices:</b></p> <ul style="list-style-type: none"> <li>(1) Care</li> <li>(2) Relationships with professionals</li> <li>(3) Decision input</li> <li>(4) The process of decision making</li> <li>(5) Decisions made</li> </ul>                  | <p>During babies' admission (three times)</p> <ul style="list-style-type: none"> <li>- Within 0-3 days</li> <li>- 9-12 days</li> <li>- 25-28 days of an infant's admission to the NICU</li> </ul> | <p><b>Three satisfaction questionnaires</b></p> <p>1. Two subscales of the investigator-designed "Parents' Understanding of Infant Care and Outcomes Questionnaire" were used to measure Satisfaction with Care (1).</p> <p><b>Validation:</b> Partially reported. Authors stated content validity testing took place; no information on reliability testing provided.</p> <p>30 questions.</p> <p>Five-point Likert scale.</p> <p>2. A subscale of the investigator-designed "Relationships with Professional and Decision Input Questionnaire" was used to measure Satisfaction with relationships (2).</p> <p><b>Validation:</b> Partially reported. Authors stated content validity testing took place; no information on reliability testing provided.</p> <p>12 questions.</p> <p>Five-point Likert scale</p> <p>3. Validated. The "Collaboration and Satisfaction About Care Questionnaire" developed by Baggs, was used to measure Satisfaction with decision input (3), with decision process (4) and with decisions made (5).</p> <p>9 questions.</p> <p>7-point scale, (1 strongly disagree-7 strongly agree)</p> | <p><b>The intervention group was more satisfied with the amount of decision input they had (3) and with the process by which medical decisions were made (4).</b></p> <p><b>Interv Control p-value</b><br/>Decision input amount (3)<br/>Mean 120.20 104.95 0.012</p> <p>Process of decision making (4)<br/>Mean 33.44 30.05 0.058</p> <p>There were no statistically significant differences between control and intervention groups in satisfaction with their infants' care (1), with relationships with NICU professionals (2) and with the decisions made for infant treatment (5).</p>   | No | 1 |
| 17. Byers et al. (2003), USA                | Mothers/ 19                                                                                                 | Mean (SD)<br>Control: 29 (2.00)<br>Interv: 28.9 (2.42)<br>/ level II-III          | <p>For the outcome of parent satisfaction:</p> <p>Non-randomised, Convenience sampling</p> <p><b>Group level effect.</b><br/>Intervention/control groups</p> <p>Pre and post-intervention testing</p>                                                                                                                                                       | <p><b>Intervention: Co-bedding premature multiple-gestation infants in incubators.</b></p> <p>Infants were nursed in the same incubator using a co-bedding protocol (e.g. recording all of the care provided to one infant before providing care to the second infant)</p> <p><b>Control:</b> Single-bedding premature multiple-gestation infants in incubators.</p>                                                                                                                                                                                                             | <p><b>Parent satisfaction related to:</b><br/>- staff concern<br/>- support of family<br/>- staff explanations<br/>- infant environment,<br/>- comfort with feeding<br/>- kangaroo care encouragement<br/>- staff explanation of signs of infant stress<br/>- visiting schedule<br/>- overall satisfaction with the NICU experience</p> | <p>During babies' admission (twice)</p> <ul style="list-style-type: none"> <li>- At baseline</li> <li>- 5 days later</li> </ul>                                                                   | <p><b>Satisfaction questionnaire</b></p> <p>The NICU's standard parental satisfaction tool was used.</p> <p><b>Validation:</b> Partially reported. Authors stated content validity testing took place, but because of the disparate nature of the items, survey reliability could not be assessed.</p> <p>11 questions.</p> <p>5-point Likert-type scale.</p>                                                                                                                                                                                                                                                                                                                                                                                                                                                                                                                                                                                                                                                                                                                                                                | <p><b>The only significant difference for a post-intervention item was a higher score for the item "Attempts were made to create a quiet environment for my baby."</b></p> <p><b>Interv Control p-value</b><br/>Mean 4.80 3.89 0.033</p> <p>Independent t-tests comparing the co-bedded and control group parental scores found no significant differences in their parental satisfaction scores, except for higher baseline parental satisfaction scores (p=0.029) in the co-bedded group.</p>                                                                                                | No | 1 |

247

248

|                                        |                                  |                                                                          |                                                                                                                 |                                                                                                                                                                                                                                                                                                                                                                                                                                                                                                                                                                                 |                                                                                                                              |                                                                                                                                                                                                                                     |                                                                                                                                                                                                                                                                                                                                                                                                                                                                                                                                                   |                                                                                                                                                                                                                                                                                                                                                                                                                                                                                                                                                                           |    |   |
|----------------------------------------|----------------------------------|--------------------------------------------------------------------------|-----------------------------------------------------------------------------------------------------------------|---------------------------------------------------------------------------------------------------------------------------------------------------------------------------------------------------------------------------------------------------------------------------------------------------------------------------------------------------------------------------------------------------------------------------------------------------------------------------------------------------------------------------------------------------------------------------------|------------------------------------------------------------------------------------------------------------------------------|-------------------------------------------------------------------------------------------------------------------------------------------------------------------------------------------------------------------------------------|---------------------------------------------------------------------------------------------------------------------------------------------------------------------------------------------------------------------------------------------------------------------------------------------------------------------------------------------------------------------------------------------------------------------------------------------------------------------------------------------------------------------------------------------------|---------------------------------------------------------------------------------------------------------------------------------------------------------------------------------------------------------------------------------------------------------------------------------------------------------------------------------------------------------------------------------------------------------------------------------------------------------------------------------------------------------------------------------------------------------------------------|----|---|
| 18. Polizzi et al. (2003), USA         | Mothers and fathers/ 33          | Mean (SD)<br>Control: 32.97 (1.9)<br>Interv: 33.08 (1.31)<br>/ level III | A retrospective, comparative, descriptive design.<br><br>Unit level effect                                      | <b>Intervention:</b> Co-bedding multiple-gestation infants in the NICU.<br><br>Multiple-gestation infants were nursed in the same incubator or crib. The intervention was evaluated retrospectively after implementation of a co-bedding practice protocol.<br><br><b>Control:</b> Traditionally-bedded group (babies were routinely placed in separate incubators or cribs)                                                                                                                                                                                                    | <b>Parental satisfaction as measured by 9 questions relating to parent perceptions and their baby's care</b>                 | After babies were discharged (once)<br><br>- All parents were mailed the survey. A second survey was sent to those who did not respond after 2 months<br><br>No pre-intervention parent satisfaction data available for comparison. | <b>Satisfaction questionnaire</b><br><br>The <i>parental perception/satisfaction tool</i> was used.<br><br><b>Validation:</b> Partially reported. Authors stated content validity testing took place; no information on reliability testing provided. 6/9 questions were from a similar tool that was validated by the Vermont Oxford NICU Quality Improvement Initiative.<br><br>9 questions (such as "I was satisfied with the care my babies received in the hospital").<br><br>Likert (1 strongly disagree- 5 strongly agree)                 | Mothers reported overall satisfaction with the NICU care and staff, as well as adequacy of their ability to care for their infants after discharge, with scores ranging from 4.19 to 4.71.<br><br><b>The only survey item score that was significantly different between groups was for the item "I was encouraged by the hospital staff to bond with my babies."</b><br><br>Interv Control p-value<br>Mean 4.71 4.36 0.049                                                                                                                                               | No | 1 |
| 19. Legault and Goulet. (1995), Canada | Mothers/ 61 completed both tests | Mean (range)<br>30 (24-35)<br>/ level II                                 | Time-series design<br><br>Group level effect: Same group exposed to both methods with post-method testing only. | <b>Intervention:</b> Kangaroo method of removing an infant from an incubator.<br><br>Mothers were taught the "kangaroo method" (skin-to-skin contact): infant wears a diaper/head cap and is placed in a vertical position on the parent's bared chest. A blanket covers the infant and the parent's clothing is fastened around the infant. The parent sits in a rocking chair, inclined so that the infant's head is at 60°.<br><br><b>Control:</b> Traditional method. Newborns wearing a diaper and a head cap, are wrapped in a blanket and placed in their parent's arms. | <b>Mothers' satisfaction with:</b><br>- Each method of removing an infant from incubator<br>- Her feelings after each method | During babies' admission (twice)<br><br>- After the intervention<br><br>- After the control method<br><br>No pre-intervention parent satisfaction data available for comparison.                                                    | <b>Satisfaction questionnaire</b><br><br>The "Maternal Satisfaction Questionnaire" was used. It was developed by integrating components described by Affonso et al and the clinical experience of the investigators.<br><br><b>Validation:</b> Partially reported. Authors stated content validity testing took place; no information on reliability testing provided.<br><br>15 questions<br><br>Likert (1 very much-5 don't know)<br><br>An open-ended question invited the mother to list and explain anything else related to her experience. | Regardless of the method tested, mothers expressed high levels of satisfaction (it was the first time since giving birth that they could hold their infants).<br><br>Three statements proved more powerful in discriminating between the methods:<br><br><b>Rated higher after the kangaroo method test:</b><br>- "I like the contact with my baby's skin" (p=0.0001)<br><br><b>Rated higher after the traditional method test:</b><br>- "I like to talk to and whisper to my baby" (p = 0.015)<br>- "I looked into my baby's eyes and stared at his/her face" (p=0.0001) | No | 1 |

249 Legend for Tables 1-3: Number in last column illustrates each intervention's reported effect on parent

250 satisfaction: 1. Parent satisfaction was statistically significantly higher in the intervention group; 2.

251 Parent satisfaction was not reported to be statistically significantly different in the intervention group;

252 3. Unclear if parent satisfaction improved (small study numbers and/or no statistical analysis

253 performed); 4. Only the intervention group was assessed

## 254 Parent satisfaction

255 Outcome measures: All 32 studies reported they measured parent satisfaction as an a

256 priori outcome. Only one study confirmed this through a protocol. Overall 18/32

257 (56%) of studies (4/10, 40% RCT and 14/22, 64% non-RCT) reported a higher level

258 of parent satisfaction associated with the intervention studied. Multiple different

259 outcome measures within the domain of parent satisfaction were used; we grouped

260 these into 4 categories: i) Parent satisfaction (no additional description); ii) Parent

261 satisfaction with NICU care; iii) Parent satisfaction related to specific components

262 such as communication, staff or information; iv) Parent satisfaction with a specific

263 intervention.

1  
2  
3 266 Timing of measurement: Parent satisfaction was mostly measured '*during infant*  
4  
5 267 *admission only*' (24 studies; between 1-4 times), followed by '*after infant discharge*  
6  
7 268 *only*' (5 studies; 1 time) and '*both during admission and after discharge*' (3 studies;  
8  
9 269 between 1-3 times). In the majority of studies (19/32, 59%) no pre-intervention  
10  
11 270 parent satisfaction measurements were conducted in the same parent groups with  
12  
13 271 available post-intervention data (ie paired parent data for satisfaction levels did not  
14  
15 272 exist). Instead, impact of interventions was determined comparing  
16  
17 273 intervention/control group measurements in different time periods (Tables 1-3).  
18  
19  
20  
21  
22

23  
24 275 Method of measurement: Parent satisfaction was assessed using 32 different methods:  
25  
26 276 29 different questionnaires, 2 different single questions, and by structured interview  
27  
28 277 in 1 study; in total 334 different questions were used to assess parent satisfaction.  
29  
30 278 Only 6/29 (21%) of questionnaires were reported to be fully validated (both content  
31  
32 279 validation and reliability testing); 23/29 (79%) questionnaires were partially or  
33  
34 280 completely unvalidated. The most commonly used questionnaire was the validated  
35  
36 281 *Neonatal Index of Parent Satisfaction (NIPS)*[16] questionnaire (3 studies).  
37  
38  
39

40 282

#### 41 283 Interventions and impact on parent satisfaction

42 284

43  
44  
45  
46  
47 285 We grouped included studies into 5 intervention themes: parent involvement (14  
48  
49 286 studies); information provision/communication (8 studies); clinical care (7 studies);  
50  
51 287 parent emotional support (2 studies); other (1 study). Parent involvement  
52  
53 288 interventions were more commonly assessed in RCT compared to non-RCT .  
54  
55 289 We categorised interventions *as effective or not effective* based upon whether a  
56  
57 290 statistically significant difference between intervention and control groups was  
58  
59  
60

291 reported for parent satisfaction (Tables 4,5). None of the studies reported statistically  
 292 significantly lower parent satisfaction in the intervention group compared to the  
 293 control group. We classified studies as *unclear if effective* if they included small  
 294 sample numbers or if statistical analysis was not performed (Table 6). Finally, we  
 295 highlighted studies where *only the intervention group was assessed and only post-*  
 296 *intervention*, where comparison to a control group was not possible (Table 7).  
 297  
 298 Overall, 18/32 studies (56%) reported higher parent satisfaction in the intervention  
 299 group; 4/10 RCT and 14/22 non-RCT. The intervention theme where higher  
 300 satisfaction was most consistently reported was parent involvement (10/14 studies).  
 301 Due to the large heterogeneity of outcome measure scales a quantitative synthesis and  
 302 meta-analysis was not possible.

303  
 304 **Table 4.** “Effective” interventions in themes

| <b>Theme: Parent involvement</b>                                                                         |
|----------------------------------------------------------------------------------------------------------|
| More NICU access, parents on WRs, Education (De Bernardo et al, Italy, 2017)                             |
| Rooming-in care (Kazemian et al, Iran, 2016)                                                             |
| Parental Presence at Clinical Bedside Rounds (Abdel-Latif et al, Australia, 2015) <b>RCT</b>             |
| More NICU access, care involvement, education (Bastani et al, Iran, 2015) <b>RCT</b>                     |
| Education re: pain management (Franck et al, UK, 2011) <b>RCT</b>                                        |
| Single-family NICU rooms (Stevens et al, USA, 2011)                                                      |
| Family-centered rounds (Voos et al, USA, 2011)                                                           |
| Newborn Individualised Developmental Care and Assessment Program (NIDCAP) (Netherlands, 2006)            |
| Infant Progress Charts filled by parents and 3 Care Planning Meetings (Penticuff and Arheart. USA, 2005) |
| Kangaroo care (Legault and Goulet, Canada, 1995)                                                         |
| <b>Theme: Information provision / communication</b>                                                      |

|                                                                                                                |
|----------------------------------------------------------------------------------------------------------------|
| Internet-based education (Kadivar et al, Iran, 2017)                                                           |
| Daily SMS from Electronic Patient Record (Globus et al, Israel, 2016)                                          |
| Staff education, staff contact card given to parents, staff poster at NICU reception (10)                      |
| Provision of taped conversations with neonatologists to mothers (Koh et al, Australia, 2007) <b>RCT</b>        |
| <b>Theme: Clinical care</b>                                                                                    |
| a. Headbox oxygen for respiratory distress<br>b. CPAP for respiratory distress (Foster et al, Australia, 2008) |
| Co-bedding infants in incubators (prospective) (Byers et al, USA, 2003)                                        |
| Co-bedding infants in incubators (retrospective) (Polizzi et al, USA, 2003)                                    |
| <b>Theme: Parent emotional support</b>                                                                         |
| Narrative writing (Kadivar et al, Iran, 2017)                                                                  |

305 Legend: *Interventions where parent satisfaction was reported to be statistically*  
 306 *significantly higher in the intervention group. RCT: Randomised Controlled Trial*

307

308 **Table 5.** “*Ineffective*” interventions in themes

|                                                                                                                                        |
|----------------------------------------------------------------------------------------------------------------------------------------|
| <b>Theme: Parent involvement</b>                                                                                                       |
| a. Massage with auditory, tactile, visual, and vestibular stimulation<br>b. Kangaroo care (Holditch-Davis et al, USA, 2013) <b>RCT</b> |
| Individualised, developmentally supportive family-centered care interventions (Byers et al, USA, 2006)                                 |
| <b>Theme: Information provision / communication</b>                                                                                    |
| Sharing information obtained from parent interviews with the primary NICU provider (Clarke-Pounder et al, USA, 2015) <b>RCT</b>        |
| <b>Theme: Clinical care</b>                                                                                                            |
| Clinical Nurse Specialist/ neonatal practitioner team care (Mitchell-DiCenso et al, Canada, 1996) <b>RCT</b>                           |
| <b>Theme: Other</b>                                                                                                                    |
| Free Parking (Northrup et al, USA, 2016) <b>RCT</b>                                                                                    |

309 Legend: *Interventions where parent satisfaction was not reported to be statistically*

310 *significantly different in the intervention group; RCT: Randomised Controlled Trial*



311

312 **Table 6.** “Unclear if effective” interventions in themes

|                                                                                              |
|----------------------------------------------------------------------------------------------|
| <b>Theme: Parent involvement</b>                                                             |
| Open Unit policy: 24/7 NICU access (Voos and Park, USA, 2014)                                |
| Touch and massage for 7 days (Livingston et al, USA, 2009) <b>RCT</b>                        |
| <b>Theme: Information provision / communication</b>                                          |
| Clinical staff enter updates in baby diary (Van de Vijver and Evans, UK, 2015)               |
| Detailed information provided during consenting (Broyles et al, USA, 1992) <b>RCT</b>        |
| <b>Theme: Clinical care</b>                                                                  |
| Palliative care (Petteys et al, USA, 2015)                                                   |
| Five potentially better practices in the area of discharge planning (Mills et al, USA, 2006) |

313 Legend: *Interventions where small study numbers and/or no statistical analysis*314 *performed); RCT: Randomised Controlled Trial*

315

316 **Table 7.** Interventions in themes where “only the intervention group was assessed317 *and only post-intervention”*

|                                                                                    |
|------------------------------------------------------------------------------------|
| <b>Theme: Information provision / communication</b>                                |
| Daily parent update letter from Electronic Patient Record (Palma et al, USA, 2012) |
| <b>Theme: Clinical care</b>                                                        |
| Tele-rounding robot, off-site neonatologist (Garingo et al, USA, 2016)             |
| <b>Theme: Parent emotional support</b>                                             |
| Listening visits (Segre et al, USA, 2013)                                          |

318

319 Parent input into design of interventions

320

321 Five studies (5/32, 16%) reported involving parents in intervention design, of which 2

322 reported improvement of parent satisfaction. The number of included studies was too

1  
2  
3 323 small to estimate any effect of parent co-design on the success of interventions at  
4  
5 324 study level.  
6  
7  
8 325

9  
10 326 Methodological quality  
11

12 327

13  
14 328 For the majority of RCT, key study characteristics, such as randomisation, allocation  
15  
16 329 concealment and blinding of outcome assessment, were either not stated or unclear  
17  
18 330 (Figure 2). Only one RCT had an available study protocol (retrospectively registered)  
19  
20 331 and none described blinding of study participants and/or personnel. All RCT scored a  
21  
22 332 high/unclear risk of bias in at least 4/6 Cochrane tool categories, except for one,  
23  
24 333 which scored a high/unclear risk in 3/6 categories.  
25  
26 334

27  
28 335

29  
30 336 We assessed 21/22 non-RCT studies using the ROBINS-I tool (13), excluding the  
31  
32 337 implementation project. All 21 studies were assessed as having an overall *serious* risk  
33  
34 338 of bias and 7/21 of studies (33%) were further categorised as having *critical* risk of  
35  
36 339 bias (Figure 3). Blinding of participants, personnel and outcome assessment was  
37  
38 340 poorly reported across all non-RCT and no study reported a published study protocol.  
39  
40 341 None of the included non-RCT measured or corrected for important parent/infant  
41  
42 342 confounding variables, or other relevant neonatal unit co-interventions taking place at  
43  
44 343 the same time as the intervention.  
45  
46 344

47  
48 345

49  
50 346 We were unable to use the *Standards for Reporting Implementation Studies (StaRI)*  
51  
52 347 *Statement Tool*[17] for assessing the implementation project, as the reporting was  
53  
54 348 incomplete.  
55  
56 349

57  
58 350  
59  
60

1  
2  
3 348 There was no association between methodological quality assessments and the  
4  
5 349 studies' reported effect on parent satisfaction. All 4/10 RCT that reported a higher  
6  
7 350 level of parent satisfaction associated with their intervention, scored a high/unclear  
8  
9 351 risk of bias in at least 4/6 Cochrane tool categories, one of which scored high/unclear  
10  
11 352 *risk* in all categories. Out of the 14/22 non-RCT reporting an improved parent  
12  
13 353 satisfaction, two were deemed to be at *critical risk* of bias on the ROBINS- I tool,  
14  
15 354 whilst the rest we assessed to be at *serious risk* of bias.  
16  
17  
18  
19  
20  
21  
22  
23  
24  
25

## 21 356 **DISCUSSION**

23 357  
24  
25 358 Parent satisfaction with neonatal care is increasingly recognised as an important  
26  
27 359 measure of parent experience and is being used to evaluate hospitals and healthcare  
28  
29 360 providers; use of interventions to improve parent satisfaction in neonatal units is  
30  
31 361 increasing. This is the largest review of interventions where an outcome was parent  
32  
33 362 satisfaction with neonatal care and includes 32 studies. We find low quality evidence  
34  
35 363 that interventions targeting 'parent involvement' may improve parent satisfaction  
36  
37 364 with neonatal care, but this result must be interpreted cautiously in view of the high  
38  
39 365 risk of bias in included studies.  
40  
41  
42  
43  
44  
45  
46  
47  
48  
49  
50  
51  
52  
53  
54  
55  
56  
57  
58  
59  
60

366  
367 Overall, our review highlights the complexity of evaluating parent satisfaction. As a  
368 multidimensional construct, parent satisfaction can be affected just as much by  
369 interventions directly relating to infant care (eg. Kangaroo care) as well as  
370 interventions relating to neonatal care facilities (eg. Free parking). By grouping  
371 included interventions into themes (Tables 4-7) we have highlighted the variety of

1  
2  
3 372 interventions available, as well as the majority of interventions being those relating to  
4  
5 373 'parent involvement'.  
6

7  
8 374

9  
10 375 A key reason for only selecting parent satisfaction as the outcome of interest was to  
11  
12 376 focus on a single component of parent experience, in order to reduce outcome  
13  
14 377 heterogeneity and allow direct comparison. Despite this approach, the key  
15  
16 378 methodological limitation identified in this review was inconsistency in how parent  
17  
18 379 satisfaction is defined and measured; it is notable that the majority of questionnaires  
19  
20 380 (23/29) lack validation. In keeping with neonatal studies more widely[18], this study  
21  
22 381 confirms inconsistent outcome selection as a major source of research waste in  
23  
24 382 neonatal studies examining parent experience, and further finds that there is limited  
25  
26 383 involvement of parents in study design.  
27  
28  
29

30 384

31  
32  
33 385 Strengths of our review include identifying studies with both mother and father  
34  
35 386 participants, inclusion of the full range of infant gestations and a wide range of  
36  
37 387 interventions. We followed a pre-registered protocol and report this review in line  
38  
39 388 with PRISMA guidelines[11]. To further aid direct comparison of interventions, we  
40  
41 389 only included studies that evaluated parent experience using  $\geq 1$  quantitative outcome  
42  
43 390 of parent satisfaction. One limitation of this approach is that by excluding studies  
44  
45 391 which evaluated parent experience using other measures (e.g. stress, anxiety and  
46  
47 392 depression scales) we are unable to comment on interventions that targeted these  
48  
49 393 other components of parent experience.  
50  
51

52 394

53  
54  
55 395 Another limitation is that we have only included studies in the English language, due  
56  
57 396 to resource and time constraints. By not including studies in other languages, it is  
58  
59  
60

1  
2  
3 397 possible our results are more focused on work conducted in specific countries.  
4  
5 398 Furthermore, we acknowledge that much of the research in parent experience is  
6  
7 399 qualitatively evaluated. By restricting our review to studies where  $\geq 1$  quantitative  
8  
9 400 outcome of parent satisfaction is measured, we have not included any interventions  
10  
11 401 with solely qualitative outcomes. This was in an attempt to enable direct comparison  
12  
13 402 of interventions, which has previously not been possible in any published review. By  
14  
15 403 not including studies evaluated by qualitative measures only, it is possible our results  
16  
17 404 are more focused on a particular type of interventions where quantitative evaluation  
18  
19 405 would be preferable and/or easier. It also means we may not have included all studies  
20  
21 406 ever conducted on a particular intervention, where some were only evaluated  
22  
23 407 qualitatively, making some interventions appear more 'widespread' than others.  
24  
25 408  
26  
27 409 Brett et al[19] systematically reviewed interventions aimed at improving the parent  
28  
29 410 experience more widely, but only included parents of preterm infants. Their large  
30  
31 411 number of outcome domains and heterogeneity of outcome measures (including  
32  
33 412 studies that reported only qualitative outcomes) meant the authors were unable to draw  
34  
35 413 firm conclusions about the efficacy of interventions and that comparison and meta-  
36  
37 414 analysis was not possible. The majority of our review's studies have been published  
38  
39 415 in the 7 years since the Brett review, highlighting the increasing interest in this area.  
40  
41 416 However, despite including all gestations and focusing on a specific aspect of parent  
42  
43 417 experience, heterogeneity in measurement of parent satisfaction meant we were also  
44  
45 418 unable to conduct a quantitative synthesis. Inconsistency and lack of validation of  
46  
47 419 instruments measuring parent satisfaction in neonatal care (specifically with family-  
48  
49 420 centred care) has previously been highlighted by Dall'Oglio et al[20].  
50  
51 421  
52  
53  
54  
55  
56  
57  
58  
59  
60

1  
2  
3 422 Although 31% of included studies were RCT, all were assessed as having a high risk  
4  
5 423 of bias. Randomised controlled trials are traditionally considered the highest-ranking  
6  
7 424 form of evidence, however it is worth considering whether such a design is feasible  
8  
9 425 or desirable to evaluate interventions targeting parent satisfaction. Parents in neonatal  
10  
11 426 care talk to each other, compare notes and invariably create parent-support  
12  
13 427 communities; hence it is inherently difficult to avoid contamination between parents  
14  
15 428 receiving an intervention and those who are not, meaning that blinding of parents or  
16  
17 429 health professionals is near impossible. Furthermore, parent satisfaction is likely to  
18  
19 430 be particularly susceptible to the Hawthorne effect[21], requiring longer-term follow  
20  
21 431 up. These factors may explain the low number of RCT identified in our review and  
22  
23 432 the high risk of bias seen in those that were included. In non-RCT studies, the main  
24  
25 433 methodological concern is the degree to which unmeasured and uncontrolled  
26  
27 434 confounders may explain any differences seen between groups. The non-RCT studies  
28  
29 435 included in this review were classed as having either a serious or critical risk of bias.  
30  
31 436 The overwhelming majority of studies did not adequately report baseline variables or  
32  
33 437 report other interventions during the study period, making it impossible to assess  
34  
35 438 studies for selection bias or treatment bias. Furthermore, limitations such as  
36  
37 439 contamination bias and the Hawthorne effect affect non-RCT as well. Only two non-  
38  
39 440 RCT studies evaluated the outcome of interest (parent satisfaction) both before and  
40  
41 441 after the intervention, in the same group of parents (*group level effect*), with most  
42  
43 442 studies evaluating different parent groups pre and post intervention (*unit level effect*).  
44  
45 443 An inherent weakness of this latter approach is that it assumes parent satisfaction is a  
46  
47 444 static measure at the unit level, which is unlikely to be true. As a result of these  
48  
49 445 numerous important limitations identified across all included studies, we find only  
50  
51 446 low-quality evidence in support of interventions to improve parent satisfaction with  
52  
53  
54  
55  
56  
57  
58  
59  
60

1  
2  
3 447 neonatal care, despite a majority of studies reporting a beneficial effect of  
4  
5 448 interventions. These limitations may explain the limited uptake of these interventions  
6  
7  
8 449 by the wider neonatal community.  
9

10 450

11  
12 451 Changing neonatal unit practices to incorporate any new intervention requires robust  
13  
14 452 evidence. We demonstrate here that such evidence is not currently available for  
15  
16  
17 453 improving parent satisfaction. We highlight the use of non-randomised study designs,  
18  
19 454 inconsistency in definition and measurement of parent satisfaction, the use of  
20  
21 455 unvalidated questionnaires, methodological limitations and a lack of parent  
22  
23  
24 456 involvement as contributors. Our review empirically documents the extent of these  
25  
26 457 issues in studies that use quantitative parent satisfaction surveys, and their  
27  
28 458 contribution to research waste in neonatology.  
29

30 459

31  
32  
33 460 Given the importance of parent satisfaction for both parent and offspring wellbeing,  
34  
35 461 higher quality trials that involve parents, use standardised definitions and validated  
36  
37 462 parent satisfaction measures are needed. Given the nature and challenges of the  
38  
39  
40 463 neonatal care environment and the limitations we have identified in existing research,  
41  
42 464 a cluster trial may be the most appropriate study design to rigorously evaluate  
43  
44 465 interventions to improve parent satisfaction with neonatal care.  
45  
46

47 466

## 48 467 **CONCLUSIONS**

49  
50  
51 468 Many interventions, commonly relating to parent involvement, are reported to  
52  
53 469 improve parent satisfaction with neonatal care but inconsistency in definition and  
54  
55 470 measurement of parent satisfaction and high risk of bias in all studies makes this low  
56  
57 471 quality evidence. Standardised definitions and validated parent satisfaction measures  
58  
59  
60

1  
2  
3 472 are needed, as well as higher quality trials of parent experience, involving parents in  
4  
5 473 intervention design.  
6  
7

8 474

9  
10 475 **What is already known on this topic**

- 11  
12 476 • Neonatal care significantly affects parents' mental health; parent  
13  
14 477 satisfaction is increasingly being used as a parent experience measure  
15  
16  
17 478 • Parent satisfaction is inversely related to parent stress; interventions  
18  
19 479 improving parent satisfaction have the potential to reduce parent stress,  
20  
21 480 improve parent-infant bonding and infant outcomes  
22  
23  
24 481 • Use of interventions measuring parent satisfaction as an outcome in  
25  
26 482 neonatal units is increasing, though few are formally evaluated and wider  
27  
28 483 uptake is limited; it is not known the degree to which parents are involved in  
29  
30 484 intervention design  
31  
32

33 485

34  
35 486 **What this study adds**

- 36  
37  
38 487 • There is inconsistency in how parent satisfaction in neonatal care is  
39  
40 488 defined and measured, and the majority of studies do not include parents in  
41  
42 489 intervention design  
43  
44  
45 490 • There is low quality evidence that interventions relating to parent  
46  
47 491 involvement may improve parent satisfaction with neonatal care  
48  
49 492 • Standardised, validated measures of parent satisfaction and higher  
50  
51 493 quality trials, involving parents in intervention design, are needed  
52  
53

54 494

55  
56 495 **DECLARATIONS**

57  
58 496  
59  
60



1  
2  
3 497 **Conflict of interest disclosure**  
4

5 498 SS has received research grants from the National Institute of Health Research  
6  
7 499 (NIHR), the NIHR CLAHRC NWL, Rosetrees Trust and CW+ charity. NM is  
8  
9  
10 500 Director of the Neonatal Data Analysis Unit at Imperial College London. In the last  
11  
12 501 five years NM has served on the Board of Trustees of the Royal College of  
13  
14 502 Paediatrics and Child Health, David Harvey Trust, Medical Women's Federation and  
15  
16 503 Medact; and is a member of the Nestle Scientific Advisory Board. NM has received  
17  
18 504 research grants from the British Heart Foundation, Medical Research  
19  
20 505 Council, National Institute of Health Research, Westminster Research Fund,  
21  
22 506 Collaboration for Leadership in Applied Health and Care Northwest London,  
23  
24 507 Healthcare Quality Improvement Partnership, Bliss, Prolacta Life Sciences, Chiesi,  
25  
26 508 Shire and HCA International; travel and accommodation expenses from, Nutricia,  
27  
28 509 Prolacta, Nestle and Chiesi; honoraria from Ferring Pharmaceuticals and Alexion  
29  
30 510 Pharmaceuticals for contributions to expert advisory boards, and Chiesi for  
31  
32 511 contributing to a lecture programme. CG is funded by the United Kingdom Medical  
33  
34 512 Research Council (MRC) through a Clinician Scientist Fellowship award. He has  
35  
36 513 received support from Chiesi Pharmaceuticals to attend an educational conference; in  
37  
38 514 the past 5 years he has been investigator on received research grants from Medical  
39  
40 515 Research Council, National Institute of Health Research, Canadian Institute of Health  
41  
42 516 Research, Department of Health in England, Mason Medical Research Foundation,  
43  
44 517 Westminster Medical School Research Trust and Chiesi Pharmaceuticals. IA, JW,  
45  
46 518 DB: None to declare.  
47  
48  
49  
50  
51  
52  
53  
54  
55

56 520 **Authors' contributions**  
57  
58  
59  
60

1  
2  
3 521 SS and CG conceived this systematic review. The protocol was created by SS and  
4  
5 522 CG. Searches were performed by SS and IA. All search results were reviewed by  
6  
7 523 SS, and JW. Coding was completed by SS and JW. Data analysis was completed by  
8  
9 524 SS. The first draft of the manuscript was written by SS; SS, CG and JW edited and  
10  
11 525 reviewed the manuscript. All authors approved the manuscript. This article presents  
12  
13 526 independent research supported by the National Institute for Health Research (NIHR)  
14  
15 527 The views expressed in this publication are those of the authors and not necessarily  
16  
17 528 those of the NHS, the NIHR or the Department of Health and Social Care.  
18  
19  
20  
21  
22  
23

529

### 530 **Funding**

531 This work is sponsored by Imperial College London and supported by a peer-  
532 reviewed National Institute of Health Research Doctoral Research Fellowship,  
533 awarded to SS (DRF-2017-10-172).

534

### 535 **References**

- 536 1. Neonatal Data Analysis Unit. Neonatal Data Analysis Unit Annual Report  
537 2017, 2018. Available: [https://www.rcpch.ac.uk/sites/default/files/2018-](https://www.rcpch.ac.uk/sites/default/files/2018-10/2018_nnap_report_on_2017_data_final_v8.pdf)  
538 [10/2018\\_nnap\\_report\\_on\\_2017\\_data\\_final\\_v8.pdf](https://www.rcpch.ac.uk/sites/default/files/2018-10/2018_nnap_report_on_2017_data_final_v8.pdf)
- 539 2. Lefkowitz DS, Baxt C, Evans JR. Prevalence and Correlates of Posttraumatic  
540 Stress and Postpartum Depression in Parents of Infants in the Neonatal Intensive Care  
541 Unit (NICU). *J Clin Psychol Med Settings* 2010;17(3):230-7.
- 542 3. Shaw RJ, Bernard RS, DeBlois T et al. The Relationship Between Acute  
543 Stress Disorder and Posttraumatic Stress Disorder in the Neonatal Intensive Care  
544 Unit. *Psychosomatics* 2009;50(2):131-7.

- 1  
2  
3 545 4. Beck CT, Woynar J. Posttraumatic Stress in Mothers While Their Preterm  
4  
5 546 Infants Are in the Newborn Intensive Care Unit: A Mixed Research Synthesis. *ANS*  
6  
7 547 *Adv Nurs Sci* 2017;40(4):337-55.  
8  
9  
10 548 5. Lee SK, O'Brien K. Parents as primary caregivers in the neonatal intensive  
11  
12 549 care unit. *CMAJ* 2014;186(11):845-7.  
13  
14 550 6. Grace SL, Evindar A, Stewart DE. The effect of postpartum depression on  
15  
16 551 child cognitive development and behavior: a review and critical analysis of the  
17  
18 552 literature. *Arch Womens Ment Health* 2003;6(4):263-74.  
19  
20  
21 553 7. Rocha G, Candeias L, Ramos M et al. Stress and satisfaction of mothers in  
22  
23 554 neonatal intensive care. *Acta Med Port* 2011;24(2):157-66.  
24  
25  
26 555 8. Lopez-Maestro M, Sierra-Garcia P, Diaz-Gonzalez C et al. Quality of  
27  
28 556 attachment in infants less than 1500g or less than 32 weeks. Related factors. *Early*  
29  
30 557 *Hum Dev* 2016;104:1-6.  
31  
32  
33 558 9. Charpak N, Tessier R, Ruiz JG et al. Twenty-year Follow-up of Kangaroo  
34  
35 559 Mother Care Versus Traditional Care. *Pediatrics* 2017;139(1):e20162063.  
36  
37 560 10. PROSPERO database. Available:  
38  
39 561 [http://www.crd.york.ac.uk/prospere/display\\_record.asp?ID=CRD42016042110](http://www.crd.york.ac.uk/prospere/display_record.asp?ID=CRD42016042110)  
40  
41  
42 562 11. Moher D, Liberati A, Tetzlaff J et al. Preferred reporting items for systematic  
43  
44 563 reviews and meta-analyses: the PRISMA statement. *J Clin Epidemiol*  
45  
46 564 2009;62(10):1006-12.  
47  
48  
49 565 12. Higgins JP, Altman DG, Gotzsche PC et al. The Cochrane collaboration's tool  
50  
51 566 for assessing risk of bias in randomised trials. *BMJ* 2011;343:d5928.  
52  
53  
54 567 13. Sterne JA, Hernan MA, Reeves BC et al. ROBINS-I: a tool for assessing risk  
55  
56 568 of bias in non-randomised studies of interventions *BMJ* 2016;355:i4919.  
57  
58 569 14. Green JTN. *Qualitative Methods for Health Research*. SAGE, 2014.  
59  
60

- 1  
2  
3 570 15. Duley L, Uhm S, Oliver S et al. Top 15 UK Research Priorities for Preterm  
4  
5 571 Birth. *The Lancet* 2014;383(9934):2041-2042.  
6  
7 572 16. Mitchell-DiCenso A, Guyatt G, Paes B et al. A new measure of parent  
8  
9 573 satisfaction with medical care provided in the neonatal intensive care unit. *J Clin*  
10  
11 574 *Epidemiol* 1996;49(3):313-318.  
12  
13 575 17. Pinnock H, Barwick M, Carpenter C et al. Standards for Reporting  
14  
15 576 Implementation Studies (StaRI) statement. *BMJ* 2017;356:i6795.  
16  
17 577 18. Webbe JWH, Ali S, Sakonidou S et al, Inconsistent outcome reporting in  
18  
19 578 large neonatal trials: a systematic review, *Arch Dis Child Fetal Neonatal Ed* 2019  
20  
21 579 doi: 10.1136/archdischild-2019-316823. [Epub ahead of print]  
22  
23 580 19. Brett J, Staniszewska S, Newburn M et al. A systematic mapping review of  
24  
25 581 effective interventions for communicating with, supporting and providing  
26  
27 582 information to parents of preterm infants. *BMJ Open* 2011;1(1):e000023.  
28  
29 583 20. Dall'Oglio I, Mascolo R, Gawronski O et al. A systematic review of  
30  
31 584 instruments for assessing parent satisfaction with family-centred care in neonatal  
32  
33 585 intensive care units. *Acta Paediatr* 2018;107:391-402.  
34  
35 586 21. McCambridge J, Witton J, Elbourne DR. Systematic review of the  
36  
37 587 Hawthorne effect: new concepts are needed to study research participation effects. *J*  
38  
39 588 *Clin Epidemiol* 2014;67(3):267-277.  
40  
41  
42  
43  
44  
45  
46  
47  
48  
49

50 **Figure / Table Legends**

51  
52  
53 591

54  
55 592 **Figure 1:** PRISMA Flow diagram of selected studies

56  
57 593 **Figure 2.** Cochrane Collaboration Risk of Bias tool assessment (RCT)

58  
59 594 Legend: Green- low risk of bias; Yellow- unclear risk of bias; Red- high risk of bias

1  
2  
3 595 **Figure 3.** ROBINS-I risk of bias assessment (Non-RCT)

4  
5 596

6  
7  
8 597 **Table 1.** Included Randomised Controlled Trials (RCT)

9  
10 598 **Table 2.** Included Prospective Cohort Studies

11  
12 599 **Table 3.** Included “Other” non-Randomised Controlled Trials (non-RCT)

13  
14  
15 600

16  
17 601 Legend for Tables 1-3: *Number in last column illustrates each intervention’s*

18  
19 602 *reported effect on parent satisfaction: 1. Parent satisfaction was statistically*

20  
21 603 *significantly higher in the intervention group; 2. Parent satisfaction was not reported*

22  
23 604 *to be statistically significantly different in the intervention group; 3. Unclear if*

24  
25 605 *parent satisfaction improved (small study numbers and/or no statistical analysis*

26  
27 606 *performed); 4. Only the intervention group was assessed and only post-intervention*

28  
29  
30  
31 607

32  
33 608 **Table 4.** “Effective” interventions in themes

34  
35 609 Legend: *Interventions where parent satisfaction was reported to be statistically*

36  
37 610 *significantly higher in the intervention group. RCT: Randomised Controlled Trial*

38  
39  
40 611

41  
42 612 **Table 5.** “Ineffective” interventions in themes

43  
44 613 Legend: *Interventions where parent satisfaction was not reported to be statistically*

45  
46 614 *significantly different in the intervention group; RCT: Randomised Controlled Trial*

47  
48  
49 615

50  
51 616 **Table 6.** “Unclear if effective” interventions in themes

52  
53 617 Legend: *Interventions where small study numbers and/or no statistical analysis*

54  
55 618 *performed); RCT: Randomised Controlled Trial*

56  
57  
58 619

1  
2  
3 620 **Table 7.** Interventions in themes where “*only the intervention group was assessed*  
4  
5 621 *and only post-intervention*”  
6  
7

8 622  
9

10 623 **Online supplementary files**

11  
12 624 **File 1.** OVID MEDLINE search strategy  
13  
14

15 625  
16

17 626 **Research checklist**

18  
19 627 PRISMA checklist  
20  
21

22 628  
23  
24  
25  
26  
27  
28  
29  
30  
31  
32  
33  
34  
35  
36  
37  
38  
39  
40  
41  
42  
43  
44  
45  
46  
47  
48  
49  
50  
51  
52  
53  
54  
55  
56  
57  
58  
59  
60

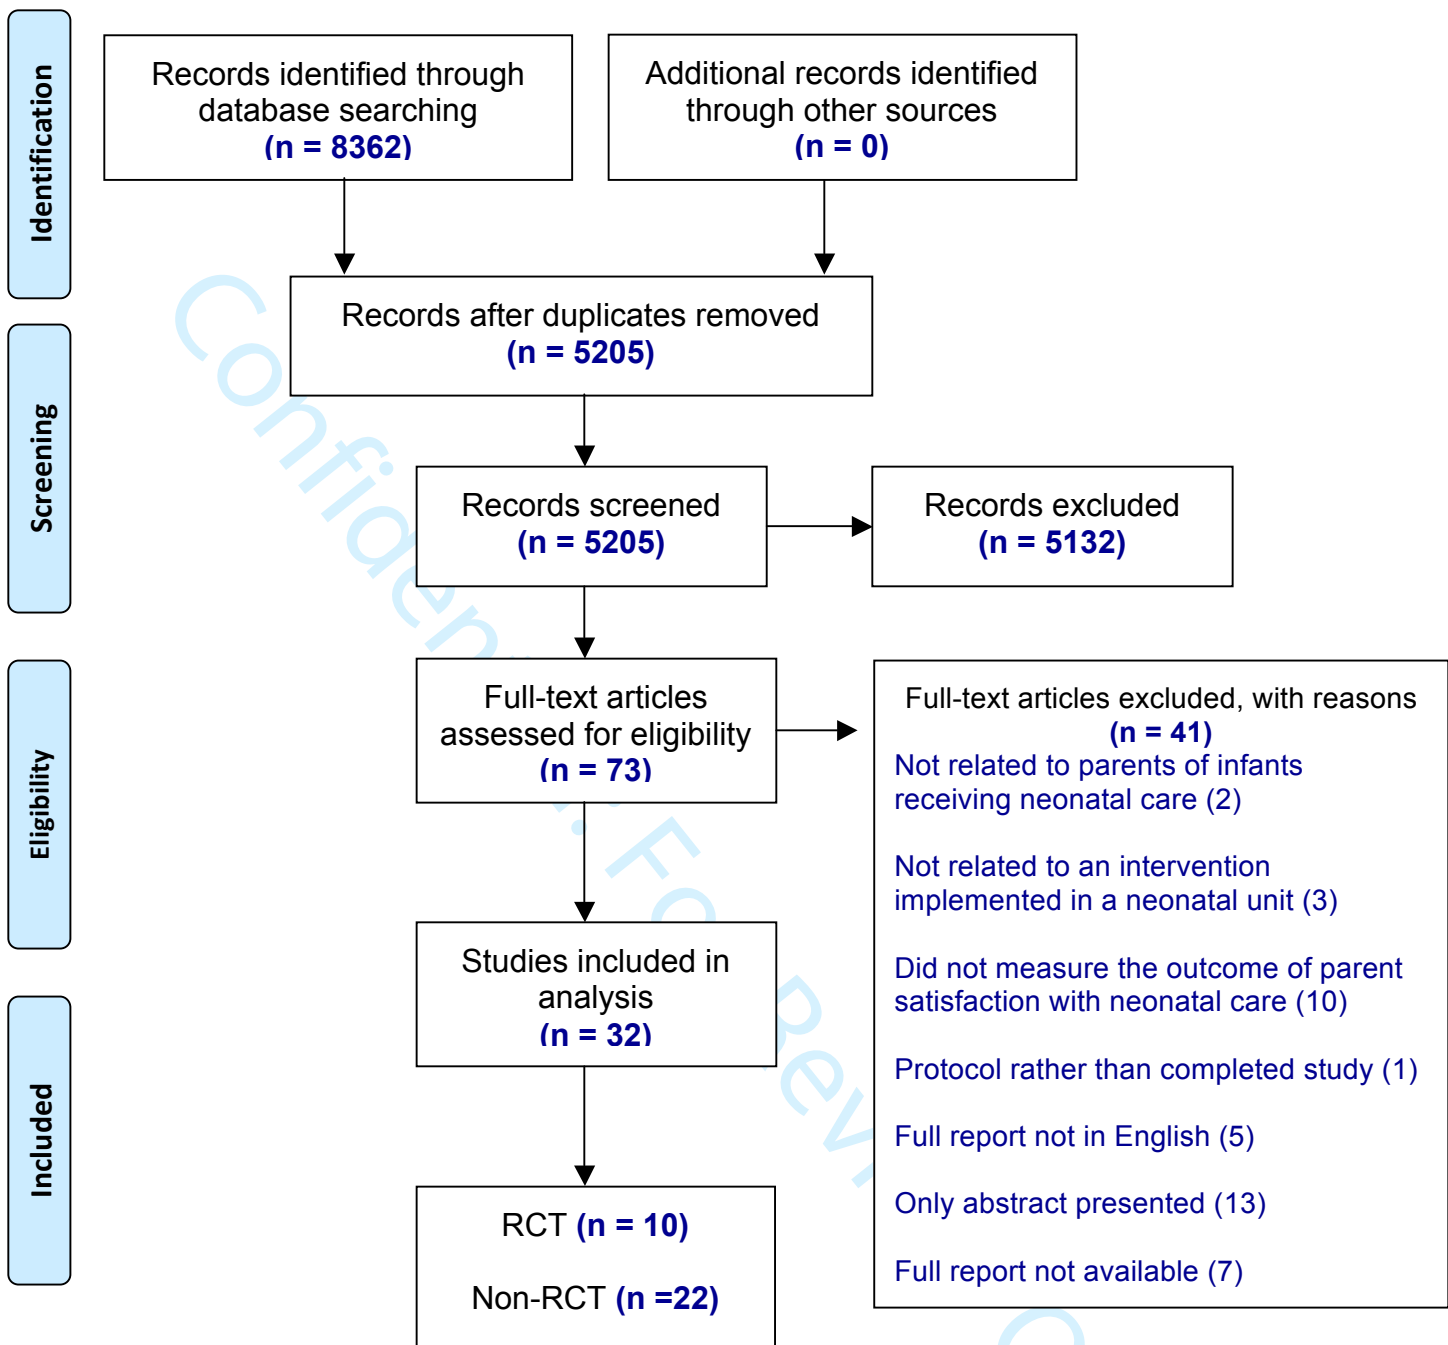

## Risk of Bias (Cochrane)

| Author<br>by publication year | Random<br>sequence<br>generation | Allocation<br>concealment | Blinding of<br>participants<br>and<br>personnel | Blinding of<br>outcome<br>assessment | Incomplete outcome data | Selective<br>reporting |
|-------------------------------|----------------------------------|---------------------------|-------------------------------------------------|--------------------------------------|-------------------------|------------------------|
| 1. Northrup (2016)            | ?                                | +                         | -                                               | ?                                    | +                       | ?                      |
| 2. Abdel-Latif<br>(2015)      | +                                | +                         | -                                               | -                                    | -                       | ?                      |
| 3. Bastani (2015)             | ?                                | ?                         | -                                               | ?                                    | +                       | ?                      |
| 4. Clarke-Pounder<br>(2015)   | ?                                | ?                         | -                                               | ?                                    | +                       | ?                      |
| 5. Holditch-Davis<br>(2013)   | +                                | +                         | -                                               | +                                    | ?                       | ?                      |
| 6. Franck (2011)              | -                                | ?                         | -                                               | ?                                    | -                       | +                      |
| 7. Livingston (2009)          | ?                                | ?                         | -                                               | ?                                    | +                       | ?                      |
| 8. Koh (2007)                 | ?                                | ?                         | -                                               | ?                                    | ?                       | ?                      |
| 9. Mitchell-DiCenso<br>(1996) | +                                | ?                         | ?                                               | ?                                    | ?                       | ?                      |
| 10. Broyles (1992)            | ?                                | ?                         | -                                               | +                                    | +                       | ?                      |



1  
2  
3  
4  
5  
6  
7  
8  
9  
10  
11  
12  
13  
14  
15  
16  
17  
18  
19  
20  
21  
22  
23  
24  
25  
26  
27  
28  
29  
30  
31  
32  
33  
34  
35  
36  
37  
38  
39  
40  
41  
42  
43  
44  
45  
46  
47



# Risk of Bias (ROBINS-I)

| Author<br>by publication<br>year                     | Bias due to<br>confounding | Bias in<br>selection of<br>participants<br>into the<br>study | Bias in<br>classification<br>of<br>interventions | Bias due to<br>deviations<br>from<br>intended<br>interventions | Bias due to<br>missing<br>data | Bias in<br>measurement<br>of outcomes | Bias in<br>selection of<br>the<br>reported<br>result | OVERALL<br>risk of bias |
|------------------------------------------------------|----------------------------|--------------------------------------------------------------|--------------------------------------------------|----------------------------------------------------------------|--------------------------------|---------------------------------------|------------------------------------------------------|-------------------------|
| 1. De Bernardo (2017)                                | SERIOUS                    | LOW                                                          | LOW                                              | SERIOUS                                                        | LOW                            | SERIOUS                               | SERIOUS                                              | SERIOUS                 |
| 2. Kadivar (2017)<br><i>Internet-based education</i> | SERIOUS                    | LOW                                                          | LOW                                              | SERIOUS                                                        | LOW                            | SERIOUS                               | MODERATE                                             | SERIOUS                 |
| 3. Kadivar (2017)<br><i>Narrative writing</i>        | SERIOUS                    | SERIOUS                                                      | LOW                                              | SERIOUS                                                        | LOW                            | SERIOUS                               | MODERATE                                             | SERIOUS                 |
| 4. Garingo (2016)                                    | CRITICAL                   | LOW                                                          | LOW                                              | SERIOUS                                                        | SERIOUS                        | SERIOUS                               | SERIOUS                                              | CRITICAL                |
| 5. Globus (2016)                                     | SERIOUS                    | LOW                                                          | LOW                                              | NO INFO                                                        | SERIOUS                        | SERIOUS                               | SERIOUS                                              | SERIOUS                 |
| 6. Kazemian (2016)                                   | SERIOUS                    | NO INFO                                                      | LOW                                              | SERIOUS                                                        | NO INFO                        | SERIOUS                               | SERIOUS                                              | SERIOUS                 |
| 7. Petteys (2015)                                    | SERIOUS                    | LOW                                                          | LOW                                              | SERIOUS                                                        | MODERATE                       | SERIOUS                               | MODERATE                                             | SERIOUS                 |
| 8. Van de Vijver (2015)                              | CRITICAL                   | LOW                                                          | LOW                                              | SERIOUS                                                        | MODERATE                       | SERIOUS                               | MODERATE                                             | CRITICAL                |
| 9. Voos (2013)                                       | CRITICAL                   | LOW                                                          | LOW                                              | SERIOUS                                                        | NO INFO                        | SERIOUS                               | SERIOUS                                              | CRITICAL                |
| 10. Segre (2013)                                     | CRITICAL                   | NO INFO                                                      | LOW                                              | SERIOUS                                                        | SERIOUS                        | SERIOUS                               | MODERATE                                             | CRITICAL                |
| 11. Palma (2012)                                     | CRITICAL                   | NO INFO                                                      | LOW                                              | SERIOUS                                                        | SERIOUS                        | SERIOUS                               | CRITICAL                                             | CRITICAL                |
| 12. Stevens (2011)                                   | SERIOUS                    | LOW                                                          | LOW                                              | SERIOUS                                                        | SERIOUS                        | SERIOUS                               | MODERATE                                             | SERIOUS                 |
| 13. Voos (2011)                                      | SERIOUS                    | LOW                                                          | LOW                                              | SERIOUS                                                        | SERIOUS                        | SERIOUS                               | MODERATE                                             | SERIOUS                 |
| 14. Weiss (2010)                                     | SERIOUS                    | LOW                                                          | LOW                                              | SERIOUS                                                        | LOW                            | SERIOUS                               | MODERATE                                             | SERIOUS                 |
| 15. Foster (2008)                                    | SERIOUS                    | CRITICAL                                                     | LOW                                              | SERIOUS                                                        | SERIOUS                        | SERIOUS                               | MODERATE                                             | CRITICAL                |
| 16. Byers (2006)                                     | SERIOUS                    | LOW                                                          | LOW                                              | SERIOUS                                                        | SERIOUS                        | SERIOUS                               | MODERATE                                             | SERIOUS                 |
| 18. Wielenga (2006)                                  | SERIOUS                    | LOW                                                          | LOW                                              | SERIOUS                                                        | LOW                            | SERIOUS                               | MODERATE                                             | SERIOUS                 |
| 19. Penticuff (2005)                                 | SERIOUS                    | LOW                                                          | LOW                                              | SERIOUS                                                        | LOW                            | SERIOUS                               | MODERATE                                             | SERIOUS                 |
| 20. Byers (2003)                                     | SERIOUS                    | LOW                                                          | LOW                                              | SERIOUS                                                        | LOW                            | SERIOUS                               | SERIOUS                                              | SERIOUS                 |
| 21. Polizzi (2003)                                   | SERIOUS                    | MODERATE                                                     | LOW                                              | SERIOUS                                                        | SERIOUS                        | SERIOUS                               | MODERATE                                             | SERIOUS                 |
| 22. Legault (1995)                                   | SERIOUS                    | CRITICAL                                                     | LOW                                              | CRITICAL                                                       | LOW                            | SERIOUS                               | MODERATE                                             | CRITICAL                |

- 1
- 2
- 3
- 4 1. intervention\$.ti,ab.
- 5 2. tool\$.ti,ab.
- 6
- 7 3. way\$.ti,ab.
- 8
- 9 4. updat\$.ti,ab.
- 10 5. method\$.ti,ab.
- 11
- 12 6. information.ti,ab.
- 13
- 14 7. sms.ti,ab.
- 15 8. implement\$.ti,ab.
- 16
- 17 9. 1 or 2 or 3 or 4 or 5 or 6 or 7 or 8
- 18 10. bab\$3.mp.
- 19
- 20 11. preterm\$.ti,ab.
- 21 12. pre term.ti,ab.
- 22
- 23 13. premature.ti,ab.
- 24
- 25 14. postterm.ti,ab.
- 26 15. post term.ti,ab.
- 27
- 28 16. infant\$.ti,ab.
- 29 17. newborn\$.ti,ab.
- 30
- 31 18. exp Infant, Newborn/
- 32
- 33 19. 10 or 11 or 12 or 13 or 14 or 15 or 16 or 17 or 18
- 34
- 35 20. neonatal intensive care.ti,ab.
- 36 21. neonatal unit\$.ti,ab.
- 37
- 38 22. NICU.ti,ab.
- 39
- 40 23. SCBU.ti,ab.
- 41 24. neonatal itu.ti,ab.
- 42
- 43 25. special care baby unit\$.ti,ab.
- 44
- 45 26. neonat\$.ti,ab.
- 46 27. Intensive Care Units, Neonatal/
- 47 28. Intensive Care Units/
- 48
- 49 29. Critical Care/
- 50
- 51 30. Neonatal Nursing/
- 52 31. 20 or 21 or 22 or 23 or 24 or 25 or 26 or 27 or 28 or 29 or 30
- 53
- 54 32. parent\$.ti,ab.
- 55 33. mother\$.ti,ab.
- 56 34. father\$.ti,ab.
- 57
- 58 35. exp Parents/
- 59
- 60

- 1
- 2
- 3
- 4 36. 32 or 33 or 34 or 35
- 5 37. satisfaction.ti,ab.
- 6
- 7 38. experience\$.ti,ab.
- 8
- 9 39. Patient Satisfaction/
- 10 40. personal satisfaction/
- 11
- 12 41. communicat\$.ti,ab.
- 13
- 14 42. exp Communication/
- 15 43. Health Communication/
- 16 44. Information Dissemination/
- 17
- 18 45. 37 or 38 or 39 or 40 or 41 or 42 or 43 or 44
- 19
- 20 46. 9 and 19 and 31 and 36 and 45
- 21
- 22
- 23
- 24
- 25
- 26
- 27
- 28
- 29
- 30
- 31
- 32
- 33
- 34
- 35
- 36
- 37
- 38
- 39
- 40
- 41
- 42
- 43
- 44
- 45
- 46
- 47
- 48
- 49
- 50
- 51
- 52
- 53
- 54
- 55
- 56
- 57
- 58
- 59
- 60

ential: For Review Only

## Randomised controlled trials (RCT) by publication year

| Author (Date), Country                  | Parent Gender/ sample size | Infants Gestation age (GA) in weeks /NICU level | Study design                           | Intervention                                                                                                                                                                                                                                                                                                                             | Outcome measures                                                                                                                                                                                                                           | Timing of measurement                                                                                                                                                                            | Method of measurement                                                                                                                                                                                                                                                                                                                                                                                                                                                                                                          | Results                                                                                                                                                                                                                                                                                                                                                                                                                                                                                                                                                                                                             | Parent co-design? | Improved parent satisfaction? |
|-----------------------------------------|----------------------------|-------------------------------------------------|----------------------------------------|------------------------------------------------------------------------------------------------------------------------------------------------------------------------------------------------------------------------------------------------------------------------------------------------------------------------------------------|--------------------------------------------------------------------------------------------------------------------------------------------------------------------------------------------------------------------------------------------|--------------------------------------------------------------------------------------------------------------------------------------------------------------------------------------------------|--------------------------------------------------------------------------------------------------------------------------------------------------------------------------------------------------------------------------------------------------------------------------------------------------------------------------------------------------------------------------------------------------------------------------------------------------------------------------------------------------------------------------------|---------------------------------------------------------------------------------------------------------------------------------------------------------------------------------------------------------------------------------------------------------------------------------------------------------------------------------------------------------------------------------------------------------------------------------------------------------------------------------------------------------------------------------------------------------------------------------------------------------------------|-------------------|-------------------------------|
| 1. Northrup et al. (2016), USA          | Mothers and fathers /116   | <28 / level III                                 | Randomised controlled trial            | <p><b>Intervention: Free Parking (FP).</b></p> <p>Parents received 7 parking vouchers at a time (value: \$10/each) and continued to receive vouchers until infant discharge. Each voucher allowed free entry and exit for 24hr.</p> <p><b>Control:</b> Parents received the standard care and did not receive vouchers.</p>              | <p><b>Parent satisfaction with NICU care</b></p>                                                                                                                                                                                           | <p>After babies were discharged (once)</p> <p>- During the first high-risk-infant clinic visit after discharge</p> <p>No pre-intervention parent satisfaction data available for comparison.</p> | <p><i>Satisfaction questionnaire</i></p> <p><b>Validation:</b> No content validity or reliability testing reported.</p> <p>11 questions</p> <p>- Seven items were summed (score 7-35) to measure "Support" (e.g., information sharing).</p> <p>- Three items measured "Emotional Connection" to the infant (score 3-15)</p> <p>- One item assessed "family involvement in infant care" (responses: not enough-just right-too much).</p> <p>Greater scores indicated higher perceived support, connection and satisfaction.</p> | <p><b>The groups did not differ significantly with respect to satisfaction.</b></p> <p><b>Interv Control p-value</b></p> <p>NICU support</p> <p><b>Mean (SD)</b> 30(2.7) 28.7(3.7) 0.07</p> <p>Emotional connection</p> <p>12.3(1.7) 12.3(1.7) 0.96</p> <p>Family involvement "just right"</p> <p>81.4% 85% 0.07</p>                                                                                                                                                                                                                                                                                                | No                | 2                             |
| 2. Abdel-Latif et al. (2015), Australia | Mothers and fathers /63    | 25-42 / level III                               | Cross-over Randomised Controlled Trial | <p><b>Intervention: Parental Presence at Clinical Bedside Rounds (PPCBR).</b></p> <p>Parents attended bedside clinical rounds. Parents had opportunity to ask questions about their baby's condition and management.</p> <p><b>Control:</b> Parents received the standard care with no parental presence at bedside clinical rounds.</p> | <p><b>Parent satisfaction assessed by questions of 3 domains:</b></p> <ol style="list-style-type: none"> <li>1. Knowledge and understanding</li> <li>2. Communication and collaboration</li> <li>3. Privacy and confidentiality</li> </ol> | <p>During babies' admission (once)</p> <p>- At the end of each study arm, separated by a washout period</p> <p>- No pre-intervention parent satisfaction data available for comparison</p>       | <p><i>Satisfaction questionnaire</i></p> <p>The authors stated "the research team designed the questionnaire".</p> <p><b>Validation:</b> No content validity or reliability testing reported.</p> <p>Number and format of questions: not stated</p>                                                                                                                                                                                                                                                                            | <p><b>PPCBR had significantly higher adjusted mean (95% CI) scores for some questions from domains 1 and 2.</b></p> <p>Domain 3 was comparable between the two study groups.</p> <p><b>Interv Control p-value</b></p> <p>Domain 1 question: "I have received adequate information about my baby's condition and management"</p> <p><b>Mean</b> 4.321 3.947 0.03</p> <p>Domain 2 questions: "In the last week I have been able to communicate effectively with my baby's healthcare team"</p> <p><b>Mean</b> 4.407 4.250 0.05</p> <p>"In the last week I have collaborated with my baby's healthcare team in the</p> | No                | 1                             |

|                                      |                                  |                                                                                                |                                                   |                                                                                                                                                                                                                                                                                                                                                                                                                                                                                                                                                                                                                                                                   |                                                                                                                                                                                                                             |                                                                                                                                                         |                                                                                                                                                                                                                                                                                                                                                                                                                                                                                           |                                                                                                                                                                                                                                                                                                                                                                                                                                                                                                                                                                                                                           |                                                                                                                                                                                                                |          |
|--------------------------------------|----------------------------------|------------------------------------------------------------------------------------------------|---------------------------------------------------|-------------------------------------------------------------------------------------------------------------------------------------------------------------------------------------------------------------------------------------------------------------------------------------------------------------------------------------------------------------------------------------------------------------------------------------------------------------------------------------------------------------------------------------------------------------------------------------------------------------------------------------------------------------------|-----------------------------------------------------------------------------------------------------------------------------------------------------------------------------------------------------------------------------|---------------------------------------------------------------------------------------------------------------------------------------------------------|-------------------------------------------------------------------------------------------------------------------------------------------------------------------------------------------------------------------------------------------------------------------------------------------------------------------------------------------------------------------------------------------------------------------------------------------------------------------------------------------|---------------------------------------------------------------------------------------------------------------------------------------------------------------------------------------------------------------------------------------------------------------------------------------------------------------------------------------------------------------------------------------------------------------------------------------------------------------------------------------------------------------------------------------------------------------------------------------------------------------------------|----------------------------------------------------------------------------------------------------------------------------------------------------------------------------------------------------------------|----------|
|                                      |                                  |                                                                                                |                                                   |                                                                                                                                                                                                                                                                                                                                                                                                                                                                                                                                                                                                                                                                   |                                                                                                                                                                                                                             |                                                                                                                                                         |                                                                                                                                                                                                                                                                                                                                                                                                                                                                                           | <p>planning of care for my baby”<br/> <b>Mean</b> 3.843 3.426 0.02</p> <p>“In the last week I have been able to ask the healthcare team questions about my baby’s care”<br/> <b>Mean</b> 4.642 4.259 0.004</p>                                                                                                                                                                                                                                                                                                                                                                                                            |                                                                                                                                                                                                                |          |
| 3. Bastani et al, (2015), Iran       | Mothers /100                     | 30-37 Mean (SD)<br><br>Control: 33.90 (2.33)<br><br>Interv: 34 (1.9)<br><br>/ level not stated | Randomised Controlled Trial (block randomisation) | <p><b>Intervention: Family-centered Care (FCC).</b></p> <p>Mothers allowed access to their baby at any time, participated in the care process and were provided with information about neonatal care.</p> <p><b>Control:</b> Mothers received the standard care where they were only allowed to be present at the time of the infant’s entry to the neonatal care unit, and were only routinely informed.</p>                                                                                                                                                                                                                                                     | <p><b>Maternal satisfaction relating to three themes:</b></p> <ol style="list-style-type: none"> <li>1. Parental presence</li> <li>2. Participation in neonatal care</li> <li>3. Information about neonatal care</li> </ol> | <p>During babies’ admission (twice)</p> <p>- 24 hours after admission<br/>                     - At the time of discharge</p>                           | <p><i>Satisfaction questionnaire</i> (Validated)</p> <p>A modified satisfaction questionnaire was used, based on a parental satisfaction instrument developed for measuring satisfaction in Paediatric intensive care Units (PICU).</p> <p>18 questions</p> <p>Graded 0 (very dissatisfied) to 4 (very satisfied).</p> <p>The overall satisfaction rate was classified based on the mean scores (score&lt;50%, between 75-50% and &gt; 75%).</p>                                          | <p><b>In the FCC group, pre and post intervention difference in maternal satisfaction was statistically significant p&lt;0.001</b></p> <p><b>Interv Control p-value Mean (SD)</b></p> <p><b>At 24 hr</b><br/>                     22.36(8.90) 22.06(9.77) 0.87</p> <p><b>At discharge</b><br/>                     59.28(6.86) 30.18(14.09) &lt;0.01</p>                                                                                                                                                                                                                                                                  | <p><b>Unclear</b></p> <p>Mothers determined the reliability of the satisfaction tool and approved the educational pamphlet. Authors did not report if mothers had direct input in the intervention design.</p> | <b>1</b> |
| 4. Clarke-Pounder et al. (2015), USA | Mothers and fathers /19 families | 23-39 / level III                                                                              | Randomised Controlled Trial                       | <p><b>Intervention: Sharing information obtained from parent interviews with the primary NICU provider.</b></p> <p>Parents interviewed using the <i>NICU- adapted Decision Making Tool (N-DMT)</i>. Information obtained was placed in the electronic medical record (EMR) and shared with the primary neonatal provider via email. Daily rounds on all infants were audio-recorded for 3 days after enrollment to see if information from the N-DMT was incorporated into daily care planning.</p> <p><b>Control:</b> The content of a recent social work note was communicated with the primary provider via e-mail, creating an attentional control group.</p> | <p><b>Parent satisfaction with care</b></p>                                                                                                                                                                                 | <p>During babies’ admission (once)</p> <p>- 2 weeks after study entry</p> <p>No pre-intervention parent satisfaction data available for comparison.</p> | <p><i>Satisfaction questionnaire</i></p> <p>A <i>NICU- adapted Decision Making Tool (N-DMT)</i> – specific questionnaire was used.</p> <p><b>Validation:</b> Partially reported. Authors stated reliability testing took place; no information on content validity provided.</p> <p>8 questions: e.g. “My baby’s doctors considered my goals and hopes for my baby during decision-making”.</p> <p>Likert scale (1 strongly agree-4 strongly disagree). Total N-DMT score range 8-32.</p> | <p><b>There was no significant difference in satisfaction with care as measured by the N-DMT scale between the control group and intervention groups in a univariable model or multiple variable model controlling for gestational age.</b></p> <p><b>Interv Control Median (range)</b><br/>                     26(15–28) 28.8(19–32)</p> <p><b>No p-value reported</b></p> <p>There was, however, a pattern of decreased satisfaction with care among the intervention group compared to the control group across the N-DMT-specific survey questions, although the differences were not statistically significant.</p> | <p><b>Yes</b></p> <p>Information obtained from parents using the N-DMT was placed in the electronic medical record (EMR) and shared with the primary NICU provider via email (forming the intervention)</p>    | <b>2</b> |
| 5. Holditch-Davis et al. (2013), USA | Mothers /208                     | Preterm infants                                                                                | Randomised controlled trial                       | <p><b>Interventions: 1. Mothers were taught how to massage infants with auditory, tactile, visual,</b></p>                                                                                                                                                                                                                                                                                                                                                                                                                                                                                                                                                        | <p><b>1. Parent (mother) satisfaction with the</b></p>                                                                                                                                                                      | <p>During admission period and post discharge</p>                                                                                                       | <p><i>Satisfaction questionnaire</i></p> <p>The questionnaire was designed by the study team.</p>                                                                                                                                                                                                                                                                                                                                                                                         | <p><b>No significant differences occurred between the groups.</b></p>                                                                                                                                                                                                                                                                                                                                                                                                                                                                                                                                                     | <p><b>No</b></p>                                                                                                                                                                                               | <b>2</b> |

| 1<br>2<br>3<br>4<br>5<br>6<br>7<br>8<br>9<br>10<br>11<br>12<br>13<br>14<br>15<br>16                                                          |                                  | Mean (SD)<br><br>Overall group 27.2 (3.0)<br><br>/ 4 centres, levels II-III | 3 groups (2 intervention and 1 control)<br><br>Post-intervention testing only.                  | <b>and vestibular stimulation (ATVV intervention)</b><br><b>2. Kangaroo care</b><br><br><b>Control:</b> Attention control group. Mothers spent a similar amount of time with the study nurse discussing the equipment needed for preterm infant care at home. Study nurses provided education and support for all three groups. Mothers were not prevented from engaging in interventions of the other groups but did not receive formal education from the study nurse on the other interventions.                                                                                                                                                                                                                                        | <b>intervention</b><br><br><b>2. Satisfaction with the helpfulness of the study nurse</b><br><br><b>3. Whether the mother would recommend the study to others and the degree of change in the mother as a person and as a mother as a result of being in the study.</b>                    | - At the time of discharge<br><br>- At 2 months corrected age<br><br>No pre-intervention parent satisfaction data available for comparison. | <b>Validation:</b> Partially reported. Authors stated reliability testing took place; no information on content validity provided.<br><br><b>26 questions:</b> relating to three dimensions of satisfaction: efficacy, caring, and technical quality.<br><br>Likert (1 least satisfied-5, 5 most satisfied)                                                                                                                                                                                                                                                                | Mothers in all three groups were satisfied with the intervention (mean scores of 3.3 or higher on a 5-point scale) and the helpfulness of the nurse (mean scores of 4.6 or higher on a 5-point scale).                                                                                                                                                                                                                                                                                                                                                                                                                                                                                                                     |           |          |         |           |            |            |  |        |         |           |            |            |                                                                                                                            |          |
|----------------------------------------------------------------------------------------------------------------------------------------------|----------------------------------|-----------------------------------------------------------------------------|-------------------------------------------------------------------------------------------------|--------------------------------------------------------------------------------------------------------------------------------------------------------------------------------------------------------------------------------------------------------------------------------------------------------------------------------------------------------------------------------------------------------------------------------------------------------------------------------------------------------------------------------------------------------------------------------------------------------------------------------------------------------------------------------------------------------------------------------------------|--------------------------------------------------------------------------------------------------------------------------------------------------------------------------------------------------------------------------------------------------------------------------------------------|---------------------------------------------------------------------------------------------------------------------------------------------|----------------------------------------------------------------------------------------------------------------------------------------------------------------------------------------------------------------------------------------------------------------------------------------------------------------------------------------------------------------------------------------------------------------------------------------------------------------------------------------------------------------------------------------------------------------------------|----------------------------------------------------------------------------------------------------------------------------------------------------------------------------------------------------------------------------------------------------------------------------------------------------------------------------------------------------------------------------------------------------------------------------------------------------------------------------------------------------------------------------------------------------------------------------------------------------------------------------------------------------------------------------------------------------------------------------|-----------|----------|---------|-----------|------------|------------|--|--------|---------|-----------|------------|------------|----------------------------------------------------------------------------------------------------------------------------|----------|
| 17<br>18<br>19<br>20<br>21<br>22<br>23<br>24<br>25<br>26<br>27<br>28<br>29<br>30<br>31<br>32<br>33<br>34<br>35<br>36<br>37<br>38<br>39<br>40 | 6. Franck et al. (2011), UK      | Mothers and fathers /169                                                    | Mean (SD)<br><br>Control: 31.94 (5.17)<br><br>Interv: 29.40 (3.17)<br><br>/4 centres, level III | Cluster Randomised Controlled Trial<br><br><b>Intervention: Increasing parental involvement in infant pain management in the NICU.</b><br><br>Parents received a booklet providing evidence-based information about pain and comforting infants in the NICU setting. Parents received 2 visits from a research nurse showing them how to apply the comforting techniques described in the booklet.<br><br><b>Control:</b> As part of usual care, parents in both the intervention and control groups received a detailed booklet with generic information about NICU care. Parents in the control group also received 2 visits from a research nurse listening to what parents had to say about their NICU experience (attention placebo). | At baseline:<br><br><b>1. Parent satisfaction with NICU care</b><br><br>One week after the intervention:<br><br><b>1. Satisfaction with information about pain control</b><br><br><b>2. Satisfied nurses make infant comfortable</b><br><br><b>3. Satisfied pain medicines help infant</b> | During babies' admission (twice)<br><br>-At baseline (within 3 to 7 days of admission)<br><br>- 1 week after the intervention               | <b>Individual questions</b><br><br><b>Validation:</b> No content validity or reliability testing reported.<br><br>1. At baseline:<br><br>Parent satisfaction was measured by 1 question: "Satisfaction with NICU care" (1 very satisfied-6 very unsatisfied) as part of the baseline parent characteristics questionnaire.<br><br>2. One week after the intervention:<br><br>Three questions using the word "satisfied" were selected from the validated <i>Parent Attitudes About Infant Nociception (PAIN)</i> survey (Likert scale 1 very satisfied-6 very unsatisfied) | <b>At baseline: there was no significant difference in satisfaction between intervention and control group</b><br><br><table border="1"> <thead> <tr> <th></th> <th>Interv</th> <th>Control</th> </tr> </thead> <tbody> <tr> <td>Mean (SD)</td> <td>1.45(0.71)</td> <td>1.51(0.76)</td> </tr> </tbody> </table> <p>p-value missing</p><br><b>1 week after the intervention: Intervention parents were more satisfied with the information about pain control received than control parents.</b><br><br><table border="1"> <thead> <tr> <th></th> <th>Interv</th> <th>Control</th> </tr> </thead> <tbody> <tr> <td>Mean (SD)</td> <td>2.10(0.97)</td> <td>3.28(1.27)</td> </tr> </tbody> </table> <p>p-value &lt; 0.001</p> |           | Interv   | Control | Mean (SD) | 1.45(0.71) | 1.51(0.76) |  | Interv | Control | Mean (SD) | 2.10(0.97) | 3.28(1.27) | <b>Yes</b><br><br>The booklet was reviewed by 12 parents of infants who had been cared for in NICUs in the United Kingdom. | <b>1</b> |
|                                                                                                                                              | Interv                           | Control                                                                     |                                                                                                 |                                                                                                                                                                                                                                                                                                                                                                                                                                                                                                                                                                                                                                                                                                                                            |                                                                                                                                                                                                                                                                                            |                                                                                                                                             |                                                                                                                                                                                                                                                                                                                                                                                                                                                                                                                                                                            |                                                                                                                                                                                                                                                                                                                                                                                                                                                                                                                                                                                                                                                                                                                            |           |          |         |           |            |            |  |        |         |           |            |            |                                                                                                                            |          |
| Mean (SD)                                                                                                                                    | 1.45(0.71)                       | 1.51(0.76)                                                                  |                                                                                                 |                                                                                                                                                                                                                                                                                                                                                                                                                                                                                                                                                                                                                                                                                                                                            |                                                                                                                                                                                                                                                                                            |                                                                                                                                             |                                                                                                                                                                                                                                                                                                                                                                                                                                                                                                                                                                            |                                                                                                                                                                                                                                                                                                                                                                                                                                                                                                                                                                                                                                                                                                                            |           |          |         |           |            |            |  |        |         |           |            |            |                                                                                                                            |          |
|                                                                                                                                              | Interv                           | Control                                                                     |                                                                                                 |                                                                                                                                                                                                                                                                                                                                                                                                                                                                                                                                                                                                                                                                                                                                            |                                                                                                                                                                                                                                                                                            |                                                                                                                                             |                                                                                                                                                                                                                                                                                                                                                                                                                                                                                                                                                                            |                                                                                                                                                                                                                                                                                                                                                                                                                                                                                                                                                                                                                                                                                                                            |           |          |         |           |            |            |  |        |         |           |            |            |                                                                                                                            |          |
| Mean (SD)                                                                                                                                    | 2.10(0.97)                       | 3.28(1.27)                                                                  |                                                                                                 |                                                                                                                                                                                                                                                                                                                                                                                                                                                                                                                                                                                                                                                                                                                                            |                                                                                                                                                                                                                                                                                            |                                                                                                                                             |                                                                                                                                                                                                                                                                                                                                                                                                                                                                                                                                                                            |                                                                                                                                                                                                                                                                                                                                                                                                                                                                                                                                                                                                                                                                                                                            |           |          |         |           |            |            |  |        |         |           |            |            |                                                                                                                            |          |
| 41<br>42<br>43<br>44<br>45<br>46                                                                                                             | 7. Livingston et al. (2009), USA | Mothers /12                                                                 | Mean (SD)<br><br>Control:                                                                       | Randomised Controlled Trial<br><br><b>Intervention: Touch and massage.</b><br><br>Mothers attended a 1hr massage class taught by a                                                                                                                                                                                                                                                                                                                                                                                                                                                                                                                                                                                                         | <b>1. Caregiver (mother) satisfaction with their infant's care</b>                                                                                                                                                                                                                         | During babies' admission (three times)<br><br>- At baseline                                                                                 | <b>Satisfaction questionnaire</b><br><br>Two questionnaires were developed by the research team.                                                                                                                                                                                                                                                                                                                                                                                                                                                                           | <b>It is unclear in the report if specific between-group comparisons and statistical analysis were conducted.</b>                                                                                                                                                                                                                                                                                                                                                                                                                                                                                                                                                                                                          | <b>No</b> | <b>3</b> |         |           |            |            |  |        |         |           |            |            |                                                                                                                            |          |

| 1<br>2<br>3<br>4<br>5<br>6<br>7<br>8<br>9<br>10<br>11<br>12<br>13<br>14<br>15<br>16<br>17<br>18<br>19<br>20<br>21<br>22<br>23          |                                 | 33.4 (6.4)<br><br>Interv:<br>38.5 (3.1)<br><br>/ level III |                              | nurse CIMI (certified infant massage instructor) and were asked to participate in at least 3 bedside massage instruction sessions taught within the next week. Infants received massage for 7 consecutive days, from the mother or a CIMI. The touch procedure lasted 20 minutes.<br><br><u>Control:</u> Infants received all usual hospital services including medical care, physical and occupational therapy services and developmentally supportive nursing care. | <b>2. Caregiver satisfaction with the neonatal unit and the massage therapist</b>                           | - Upon completing the 7-day massage program<br><br>- 1 month following intervention                                                                                                     | <u>Validation:</u> No content validity or reliability testing reported.<br><br>-1 <sup>st</sup> questionnaire (at baseline): a brief self-report questionnaire about caregiver satisfaction with their infant's care until that moment. No further details reported.<br><br>-2 <sup>nd</sup> questionnaire (upon completing the 7-day massage program and 1 month following intervention): a 10-minute satisfaction questionnaire relating to infant's response and caregiver satisfaction with the neonatal unit and the massage therapist.<br><br><u>Number of questions:</u> not stated.<br><br>Likert scale (1 very dissatisfied-4 very satisfied).<br><br>Sample statements:<br>'How satisfied do you feel giving massage to your infant?'; 'I feel that massage improved my infant's hospital stay.' | <u>At baseline and day 7:</u> All caregivers were highly satisfied with the medical treatment their infant received.<br><br><u>At day 7 and 1 month follow-up:</u> All caregivers participating in the massage group reported high levels of satisfaction regarding their relationship with their infant and the massage program's impact on that relationship.<br><br>Slight improvements in satisfaction regarding time the caregiver spent with the infant and involvement in the infant's care were observed between day 7 and the 1-month follow-up (no further information reported).                                                                                       |  |        |         |                     |                |                   |           |          |
|----------------------------------------------------------------------------------------------------------------------------------------|---------------------------------|------------------------------------------------------------|------------------------------|-----------------------------------------------------------------------------------------------------------------------------------------------------------------------------------------------------------------------------------------------------------------------------------------------------------------------------------------------------------------------------------------------------------------------------------------------------------------------|-------------------------------------------------------------------------------------------------------------|-----------------------------------------------------------------------------------------------------------------------------------------------------------------------------------------|------------------------------------------------------------------------------------------------------------------------------------------------------------------------------------------------------------------------------------------------------------------------------------------------------------------------------------------------------------------------------------------------------------------------------------------------------------------------------------------------------------------------------------------------------------------------------------------------------------------------------------------------------------------------------------------------------------------------------------------------------------------------------------------------------------|-----------------------------------------------------------------------------------------------------------------------------------------------------------------------------------------------------------------------------------------------------------------------------------------------------------------------------------------------------------------------------------------------------------------------------------------------------------------------------------------------------------------------------------------------------------------------------------------------------------------------------------------------------------------------------------|--|--------|---------|---------------------|----------------|-------------------|-----------|----------|
| 24<br>25<br>26<br>27<br>28<br>29<br>30<br>31<br>32<br>33<br>34<br>35<br>36<br>37<br>38<br>39<br>40<br>41<br>42<br>43<br>44<br>45<br>46 | 8. Koh et al. (2007), Australia | Mothers /200<br><br>Not stated / not stated                | Randomised, Controlled Trial | <u>Intervention: Provision of taped conversations with neonatologists to mothers.</u><br><br>The initial conversation and subsequent conversations of significance with a neonatologist were taped and analysed (for both groups). Mothers received a tape of each conversation and a tape recorder.<br><br><u>Control:</u> Usual care. Mothers were not given the tape or recorder.                                                                                  | <b>Satisfaction with conversations held with the neonatologist</b><br><br><b>Satisfaction with the tape</b> | During admission period and post discharge<br><br>- At 10 days<br><br>- At 4 months<br><br>- At 12 months<br><br>No pre-intervention parent satisfaction data available for comparison. | <i>Individual questions and a satisfaction scale</i><br><u>Validation:</u> No content validity or reliability testing reported.<br><br><u>Number of questions:</u> not stated.<br><br>Likert scale (1-5 most satisfied)<br><br>Questions related to: Satisfaction with amount and quality of information presented, doctors' communication skills, patient's participation in the conversation.<br><br>A satisfaction scale was used to assess: Satisfaction with the tape                                                                                                                                                                                                                                                                                                                                 | No differences were found between the two groups in satisfaction with conversations.<br><br><b>Mothers of babies with a poor outcome in the tape group were, however, significantly more satisfied with the conversations:</b><br><br><table border="1"> <thead> <tr> <th></th> <th>Interv</th> <th>Control</th> </tr> </thead> <tbody> <tr> <td><b>Mean (95%CI)</b></td> <td>115(104-123.2)</td> <td>100.5(94.1-109.4)</td> </tr> </tbody> </table> <p><b>p-value 0.0051</b></p><br>Most (71-92%) of the mothers given the tapes stated that they helped their understanding, reminded them of what had been said, and helped their family to understand and recall information. |  | Interv | Control | <b>Mean (95%CI)</b> | 115(104-123.2) | 100.5(94.1-109.4) | <b>No</b> | <b>1</b> |
|                                                                                                                                        | Interv                          | Control                                                    |                              |                                                                                                                                                                                                                                                                                                                                                                                                                                                                       |                                                                                                             |                                                                                                                                                                                         |                                                                                                                                                                                                                                                                                                                                                                                                                                                                                                                                                                                                                                                                                                                                                                                                            |                                                                                                                                                                                                                                                                                                                                                                                                                                                                                                                                                                                                                                                                                   |  |        |         |                     |                |                   |           |          |
| <b>Mean (95%CI)</b>                                                                                                                    | 115(104-123.2)                  | 100.5(94.1-109.4)                                          |                              |                                                                                                                                                                                                                                                                                                                                                                                                                                                                       |                                                                                                             |                                                                                                                                                                                         |                                                                                                                                                                                                                                                                                                                                                                                                                                                                                                                                                                                                                                                                                                                                                                                                            |                                                                                                                                                                                                                                                                                                                                                                                                                                                                                                                                                                                                                                                                                   |  |        |         |                     |                |                   |           |          |



|                                                                                                                |                                           |                         |                                                                             |                              |                                                                                                                                                                                                                                                                                                                                                                                                                                      |                                                                                         |                                                                                                                                                                                                                                                                                                        |                                                                                                                                                                                                                                                                                                                                                                                                                                                                                                                            |                                                                                                                                                                                                                                                                                                                                                                                                                                                                                                                                                                             |    |   |
|----------------------------------------------------------------------------------------------------------------|-------------------------------------------|-------------------------|-----------------------------------------------------------------------------|------------------------------|--------------------------------------------------------------------------------------------------------------------------------------------------------------------------------------------------------------------------------------------------------------------------------------------------------------------------------------------------------------------------------------------------------------------------------------|-----------------------------------------------------------------------------------------|--------------------------------------------------------------------------------------------------------------------------------------------------------------------------------------------------------------------------------------------------------------------------------------------------------|----------------------------------------------------------------------------------------------------------------------------------------------------------------------------------------------------------------------------------------------------------------------------------------------------------------------------------------------------------------------------------------------------------------------------------------------------------------------------------------------------------------------------|-----------------------------------------------------------------------------------------------------------------------------------------------------------------------------------------------------------------------------------------------------------------------------------------------------------------------------------------------------------------------------------------------------------------------------------------------------------------------------------------------------------------------------------------------------------------------------|----|---|
| 1<br>2<br>3<br>4<br>5<br>6<br>7<br>8<br>9<br>10<br>11<br>12<br>13<br>14                                        | 9. Mitchell-DiCenso et al. (1996), Canada | Mothers and fathers/482 | Mean (SD)<br>Interv: 35.1 (4.5)<br><br>Control: 35 (4.3)<br><br>/ level III | Randomised, Controlled Trial | <b>Intervention: Clinical Nurse Specialist/ neonatal practitioner team (CNS/NP) care.</b><br><br>Infants of intervention parents were assigned to be cared for by the Clinical nurse special/neonatal practitioner CNS/NP team during the day and by paediatric residents during the night.<br><br><b>Control:</b> Paediatric residents cared for infants of control parents around the clock. Neonatologists supervised both teams. | <b>Parent satisfaction with care</b>                                                    | During admission period and post discharge (twice)<br><br>- On 5 <sup>th</sup> day after admission (full survey)<br><br>- After discharge over the phone (only questions related to satisfaction with discharge process)<br><br>No pre-intervention parent satisfaction data available for comparison. | <b>Satisfaction questionnaire (Validated)</b><br><br>The study team developed and used the validated <i>Neonatal Index of Parent Satisfaction (NIPS)</i> questionnaire.<br><br><u>Number of questions:</u> not stated.<br><br>NIPS score range (27-189); higher scores indicating greater satisfaction with care.                                                                                                                                                                                                          | <b>No statistically significant difference between groups.</b><br><br><b>Interv Control p-value</b><br>NIPS 140 139 0.67<br><b>Mean</b><br><br><b>Difference in means</b> 1.0, CI (-3.6-5.6)                                                                                                                                                                                                                                                                                                                                                                                | No | 2 |
| 15<br>16<br>17<br>18<br>19<br>20<br>21<br>22<br>23<br>24<br>25<br>26<br>27<br>28<br>29<br>30<br>31<br>32<br>33 | 10. Broyles et al. (1992), USA            | Mothers /25             | Mean (SD)<br>Control: 34 (4)<br><br>Interv: 33.4 (4)<br><br>/ level III     | Randomised Controlled Trial  | <b>Intervention: Detailed consent.</b><br><br>Mothers were given information about mechanical ventilation. Detailed risk/benefit disclosure was provided both verbally and in writing.<br><br><b>Control:</b> Mothers were given a brief verbal description about mechanical ventilation supplemented with detailed verbal and written disclosure if desired by them (flexible consent).                                             | <b>Maternal satisfaction with the information provided about mechanical ventilation</b> | During babies' admission (once)<br><br>- 24-48 hours after the intervention<br><br>No pre-intervention parent satisfaction data available for comparison.                                                                                                                                              | <b>An interview</b> evaluating maternal satisfaction with the information provided about mechanical ventilation.<br><br><b>Validation:</b> A psychiatrist with a special interest in interviewing techniques was consulted in designing and standardising this assessment.<br><br>A research nurse conducted the interview, "checking" each mother against one option regarding:<br>- Amount of information: Right amount-Too much-Too little<br><br>- Information made coping: More Difficult-Easier-No effect-Uncertain. | This study is measuring and comparing satisfaction with two different interventions (detailed vs flexible consent process), neither of which formally represent the usual routine care for all babies (no control).<br><br><b>Small numbers. No data indicating statistical analysis conducted or evidence of statistically significant results.</b><br><br><b>Detailed Flexible</b><br><b>Right</b> 75% mothers 100%<br><b>amount of information</b><br><br><b>Too</b> 25% mothers<br><b>little information</b><br><br><b>Made</b> 67% mothers 69%<br><b>coping easier</b> | No | 3 |

## Prospective cohort studies by publication year

| Author (Date), Country             | Parents' gender/sample Size                        | Infant Gestation age (GA) in weeks /NICU level                          | Study design                                                                                                                                                    | Intervention                                                                                                                                                                                                                                                                                                                                                                                         | Outcome measures                                                                                                                                                         | Timing of measurement                                                                                                                                                                                                        | Method of measurement                                                                                                                                                                                                                                                                                                                                                                                                                                                                                                                          | Results                                                                                                                                                                                                                                                                                                                                                                                                                                                                                                    | Parent co-design? | Improved parent satisfaction? |         |               |            |         |    |   |
|------------------------------------|----------------------------------------------------|-------------------------------------------------------------------------|-----------------------------------------------------------------------------------------------------------------------------------------------------------------|------------------------------------------------------------------------------------------------------------------------------------------------------------------------------------------------------------------------------------------------------------------------------------------------------------------------------------------------------------------------------------------------------|--------------------------------------------------------------------------------------------------------------------------------------------------------------------------|------------------------------------------------------------------------------------------------------------------------------------------------------------------------------------------------------------------------------|------------------------------------------------------------------------------------------------------------------------------------------------------------------------------------------------------------------------------------------------------------------------------------------------------------------------------------------------------------------------------------------------------------------------------------------------------------------------------------------------------------------------------------------------|------------------------------------------------------------------------------------------------------------------------------------------------------------------------------------------------------------------------------------------------------------------------------------------------------------------------------------------------------------------------------------------------------------------------------------------------------------------------------------------------------------|-------------------|-------------------------------|---------|---------------|------------|---------|----|---|
| 1. De Bernardo et al (2017), Italy | Mothers and Fathers /96                            | Mean (SD)<br>Control: 34.2 (5.25)<br>Interv: 32.7 (5.25)<br>/ level III | Non-randomized, prospective cohort pilot study<br><br><i>Unit level effect:</i><br>Two different time periods                                                   | <u>Intervention:</u> FCC (Family-Centered Care).<br>Parents had access to NICU for 8 hours/day. The NICU was widened and paediatric nurses taught parents procedures/practices for 10 days. Parents could observe clinical bedside rounds, hold meetings with the physicians, use the rooms and kitchen.<br><br><u>Control:</u> Parents were permitted to visit their baby in NICU for 1 hour a day. | <b>Parent satisfaction relating to 3 specific domains:</b><br><br>1. Knowledge and Understanding<br>2. Communication and Collaboration<br>3. Privacy and confidentiality | During babies' admission (once)<br><br>- At discharge (pre-FCC cohort and post-FCC cohort)<br><br>No pre-intervention parent satisfaction data available for comparison (different parent groups pre and post intervention). | <i>Satisfaction questionnaire.</i><br><br><u>Validation:</u> The authors state the survey "was designed and validated by Abdel-Latif et al". No content validity or reliability testing reported in the original paper.<br><br>9 questions<br><br>3 questions: Related to adequate and timely information about the baby's condition.<br><br>3 questions: Related to communication and collaboration with the healthcare team.<br><br>3 questions: Related to respect of patient privacy.<br><br>Likert (1 strongly disagree-5 strongly agree) | <b>7/9 individual statements in the parent satisfaction questionnaire scored higher in the FCC compared to the NFCC (statistically significant difference).</b><br><br>Example statement:<br>"I have received adequate information about my baby's condition and management."<br><br><table border="1"> <thead> <tr> <th></th> <th>Interv</th> <th>Control</th> </tr> </thead> <tbody> <tr> <td><b>Median</b></td> <td>5 (3.45-5)</td> <td>4 (3-5)</td> </tr> </tbody> </table><br><b>p-value &lt;0.05</b> |                   | Interv                        | Control | <b>Median</b> | 5 (3.45-5) | 4 (3-5) | No | 1 |
|                                    | Interv                                             | Control                                                                 |                                                                                                                                                                 |                                                                                                                                                                                                                                                                                                                                                                                                      |                                                                                                                                                                          |                                                                                                                                                                                                                              |                                                                                                                                                                                                                                                                                                                                                                                                                                                                                                                                                |                                                                                                                                                                                                                                                                                                                                                                                                                                                                                                            |                   |                               |         |               |            |         |    |   |
| <b>Median</b>                      | 5 (3.45-5)                                         | 4 (3-5)                                                                 |                                                                                                                                                                 |                                                                                                                                                                                                                                                                                                                                                                                                      |                                                                                                                                                                          |                                                                                                                                                                                                                              |                                                                                                                                                                                                                                                                                                                                                                                                                                                                                                                                                |                                                                                                                                                                                                                                                                                                                                                                                                                                                                                                            |                   |                               |         |               |            |         |    |   |
| 2. Petteys et al. (2015), USA      | Not stated/ 10 parents included in sample analysis | 24-36+ / level III                                                      | A prospective cohort design.<br><br>A feasibility study.<br><br><i>Group level effect:</i><br>Intervention/control groups<br><br>Post-intervention testing only | <u>Intervention:</u> PC (Palliative care).<br>PC nurses provided important continuity of care for NICU infants clinically requiring PC and at least weekly verbal support of parents. The PC service also coordinated family conferences, provided or requested orders to improve infant symptom management and comfort, and addressed parental coping and self-care.                                | <b>Overall satisfaction with care received</b>                                                                                                                           | During babies' admission (once)<br><br>- At discharge (or study closure for infants who remained hospitalised)<br><br>No pre-intervention parent satisfaction data available for comparison.                                 | <i>Satisfaction questionnaire</i><br><br>A researcher-created questionnaire based on extensive current literature review.<br><br><u>Validation:</u> Partially reported. Authors stated content validity testing took place; no information on reliability testing provided.<br><br>1 question<br><br>Likert (1 extremely dissatisfied-4 to extremely satisfied).                                                                                                                                                                               | <b>Parent satisfaction response numbers were small (n= 10), thus statistical comparison of parental satisfaction between cohorts was not possible.</b><br><br>However, 100% of responding PC parents (n= 2) reported being "extremely satisfied" with care, whereas only 50% of responding usual care parents (n= 4) reported extreme satisfaction.                                                                                                                                                        | No                | 3                             |         |               |            |         |    |   |

|                                                                                                                                                                                                                                                                         |                               |                                                                                               |                                                                                  |                                                                                                                                        |                                                                                                                                                                                                                                                                                                                                                                                                                                                                                                                                                                                                                  |                                                                                                                                                                                                                              |                                                                                                                                                                                                                                                     |                                                                                                                                                                                                                                                                                                                                                                                                                                                                                                                                                                |                                                                                                                                                                                                                                                                                                                                                                                                      |                                                                                                     |          |
|-------------------------------------------------------------------------------------------------------------------------------------------------------------------------------------------------------------------------------------------------------------------------|-------------------------------|-----------------------------------------------------------------------------------------------|----------------------------------------------------------------------------------|----------------------------------------------------------------------------------------------------------------------------------------|------------------------------------------------------------------------------------------------------------------------------------------------------------------------------------------------------------------------------------------------------------------------------------------------------------------------------------------------------------------------------------------------------------------------------------------------------------------------------------------------------------------------------------------------------------------------------------------------------------------|------------------------------------------------------------------------------------------------------------------------------------------------------------------------------------------------------------------------------|-----------------------------------------------------------------------------------------------------------------------------------------------------------------------------------------------------------------------------------------------------|----------------------------------------------------------------------------------------------------------------------------------------------------------------------------------------------------------------------------------------------------------------------------------------------------------------------------------------------------------------------------------------------------------------------------------------------------------------------------------------------------------------------------------------------------------------|------------------------------------------------------------------------------------------------------------------------------------------------------------------------------------------------------------------------------------------------------------------------------------------------------------------------------------------------------------------------------------------------------|-----------------------------------------------------------------------------------------------------|----------|
|                                                                                                                                                                                                                                                                         |                               |                                                                                               |                                                                                  | <u>Control:</u> Usual clinical care for infants not requiring PC.                                                                      |                                                                                                                                                                                                                                                                                                                                                                                                                                                                                                                                                                                                                  |                                                                                                                                                                                                                              | Optional free text (description of specific experiences impacting satisfaction with care)                                                                                                                                                           |                                                                                                                                                                                                                                                                                                                                                                                                                                                                                                                                                                |                                                                                                                                                                                                                                                                                                                                                                                                      |                                                                                                     |          |
| 1<br>2<br>3<br>4<br>5<br>6<br>7<br>8<br>9<br>10<br>11<br>12<br>13<br>14<br>15<br>16<br>17<br>18<br>19<br>20<br>21<br>22<br>23<br>24<br>25<br>26<br>27<br>28<br>29<br>30<br>31<br>32<br>33<br>34<br>35<br>36<br>37<br>38<br>39<br>40<br>41<br>42<br>43<br>44<br>45<br>46 | 3. Stevens et al. (2011), USA | Mothers /147. For the OPBY NICU, 58 surveys were returned. For the SFR NICU, 89 were returned | Mean (SD)<br><br>Control: 35 (4)<br><br>Interv: 34 (3)<br><br>/ level not stated | Cohort trial. This research was part of a large prospective evaluation.<br><br><i>Unit level effect:</i><br>Two different time periods | <u>Intervention:</u> <b>SFR (Single-family room) NICU for neonatal care.</b><br><br>Parents could visit their baby, room-in, do kangaroo care and breastfeed at any time, in individual rooms (containing bed, desk, closet, telephone, chair, refrigerator for breast-milk storage).<br><br><u>Control:</u> OPBY (Open-bay) NICU. The traditional open-bay NICU was typical of facilities built before 1980. All neonates, family members, staff, monitors, and equipment were visible for all neonates in each room. Portable partitions were placed around the incubator for breastfeeding and kangaroo care. | <b>Parent satisfaction with different elements of NICU:</b><br>- <i>Delivery</i><br>- <i>Environment</i><br>- <i>Nurses</i><br>- <i>Physicians</i><br>- <i>Discharge</i><br>- <i>Personal</i><br>- <i>Overall Assessment</i> | After babies were discharged (once)<br><br>- Mailed within 60 days of discharge of parents' infants from the NICU<br><br>No pre-intervention parent satisfaction data available for comparison (different parent groups pre and post intervention). | <i>Satisfaction questionnaire</i><br><br>A questionnaire from Press Ganey Associates was used. Also included were three questions added by the investigators.<br><br><u>Validation:</u> Partially reported. The original questionnaire was validated questionnaire but no content validity or reliability testing was reported regarding the 3 questions added by the study team.<br><br>42 questions in total (7 categories):<br>Delivery, Environment, Nurses, Physicians, Discharge, Personal, Overall Assessment.<br><br>Likert (1 very poor-5 very good). | <b>Statistically significant improvement was found for the survey categories of Environment, Overall and the Total survey.</b><br><br>Estimated numbers from report's figures as numbers not provided):<br><br><b>Median SFR OPBY p-value</b><br>Environment 4.7 3.7 <0.001<br>Overall 5 4.8 0.018<br>Total 4.7 4.5 0.045<br><br>16 items composite score for family-centered care:<br>4.4 4.0 0.017 | <b>Yes</b><br><br>Former NICU parents were involved in all phases of planning for the new SFR NICU. | <b>1</b> |

## "Other" Non-Randomised controlled trials (Non-RCT) by publication year

| Author (Date), Country         | Parents' gender/sample Size | Infant Gestation age (GA) in weeks /NICU level | Study design                                                                                                                                   | Intervention                                                                                                                                                                                                                                                                                                                                                                                                                                                                                                                                            | Outcome measures             | Timing of measurement                                                                           | Method of measurement                                                                                                                                                                                                                                                                             | Results                                                                                                                                                                                                                                                                                                                                                                                                                                                                                                                                      | Parent co-design? | Improved parent satisfaction? |
|--------------------------------|-----------------------------|------------------------------------------------|------------------------------------------------------------------------------------------------------------------------------------------------|---------------------------------------------------------------------------------------------------------------------------------------------------------------------------------------------------------------------------------------------------------------------------------------------------------------------------------------------------------------------------------------------------------------------------------------------------------------------------------------------------------------------------------------------------------|------------------------------|-------------------------------------------------------------------------------------------------|---------------------------------------------------------------------------------------------------------------------------------------------------------------------------------------------------------------------------------------------------------------------------------------------------|----------------------------------------------------------------------------------------------------------------------------------------------------------------------------------------------------------------------------------------------------------------------------------------------------------------------------------------------------------------------------------------------------------------------------------------------------------------------------------------------------------------------------------------------|-------------------|-------------------------------|
| 1. Kadivar et al. (2017), Iran | Mothers /68                 | <=30 – 36 / level not stated                   | Non-randomised, Convenience sampling.<br><br><i>Group level effect:</i> Intervention/control groups.<br><br>Pre and post-intervention testing. | <b>Intervention: Internet-based education.</b><br><br>Mothers used an educational website set up by the research team (files and clips). Mothers could visit the website from 5:00-6:00 pm for 10 days. They were also allowed to use the website outside of the above hours and to report the duration of using the website to the researcher. Mothers had to use the website at least 3 times during 10 days, each time for at least 30 min.<br><br><b>Control:</b> Mothers in the control group received the routine education provided in the NICU. | <b>Maternal satisfaction</b> | During babies' admission (twice)<br><br>- Day 1 of intervention<br><br>- Day 10 of intervention | <i>Satisfaction questionnaire (Validated)</i><br><br>The "What Being The Parent of a Baby is Like-Revised" Questionnaire (WBPL- Revised) was used. The original English version by Pridham and Chang was translated to Persian.<br><br>11 questions<br><br>Total satisfaction score range (11-99) | There was a significant difference in the mean score of satisfaction between cases and controls while the mean score of satisfaction increased in both groups.<br><br><b>Comparison of the mean score between the two groups showed that the level of satisfaction was significantly higher in the case group versus the control group.</b><br><br><b>Interv Control before intervention</b><br>Mean 81.62(13.50) 85.71(9.46) (SD)<br>p-value 0.993<br><br><b>after intervention</b><br>Mean 93.88 (5.38) 90.12 (7.78) (SD)<br>p-value 0.024 | No                | 1                             |

| 1<br>2<br>3<br>4<br>5<br>6<br>7<br>8<br>9<br>10<br>11<br>12<br>13<br>14<br>15<br>16<br>17<br>18<br>19<br>20<br>21                                  | 2. Kadivar et al. (2017), Iran | Mothers /70   | Mean (SD)<br>Control<br>31.6 (2.4)<br><br>Interv:<br>32.9 (3.1)<br><br>/ level not stated | Non-randomised, Convenience sampling.<br><br><i>Unit level effect:</i><br>Two different time periods                                                | <b>Intervention: Narrative writing.</b><br><br>Mothers did narrative writing at least 3 times until the 10th day of admission.<br><br><b>Control:</b> Mothers in the control group received the routine NICU treatment and care.                                                                                                                                                                                                                                                                                                                                                                                                                                    | <b>Mothers' satisfaction with medical care provided by physicians, medical students, and nurses during neonatal admission to the NICU</b> | During babies' admission (twice)<br><br>- Day 3 of intervention<br><br>- Day 10 of intervention                                                 | <i>Satisfaction questionnaire (Validated)</i><br><br>The NIPS questionnaire by Mitchell et al was used and translated to Persian.<br><br>24 questions (Likert scale)<br><br>Likert (1 always or not satisfied-7 never or completely satisfied). A higher score indicates more satisfaction. | <b>The satisfaction level of the mothers in the intervention group increased significantly during the study.</b><br><br>The results of independent t test showed a significant difference in the satisfaction changes of the mothers on the 3rd and 10th day of NICU admission between intervention and control groups, indicating the effectiveness of narrative writing.<br><br>The results of paired t-test also showed a significant difference in the mean satisfaction level of the mothers between the 3rd and the 10th day in the intervention group.<br><br><table border="1"> <thead> <tr> <th></th> <th>Interv</th> <th>Control</th> </tr> </thead> <tbody> <tr> <td>After intervention</td> <td></td> <td></td> </tr> <tr> <td>Mean (SD)</td> <td>137 (15.2)</td> <td>102.3 (25.6)</td> </tr> <tr> <td>p-value</td> <td>0.001</td> <td></td> </tr> </tbody> </table> |    | Interv | Control | After intervention |  |  | Mean (SD) | 137 (15.2) | 102.3 (25.6) | p-value | 0.001 |  | No | 1 |
|----------------------------------------------------------------------------------------------------------------------------------------------------|--------------------------------|---------------|-------------------------------------------------------------------------------------------|-----------------------------------------------------------------------------------------------------------------------------------------------------|---------------------------------------------------------------------------------------------------------------------------------------------------------------------------------------------------------------------------------------------------------------------------------------------------------------------------------------------------------------------------------------------------------------------------------------------------------------------------------------------------------------------------------------------------------------------------------------------------------------------------------------------------------------------|-------------------------------------------------------------------------------------------------------------------------------------------|-------------------------------------------------------------------------------------------------------------------------------------------------|---------------------------------------------------------------------------------------------------------------------------------------------------------------------------------------------------------------------------------------------------------------------------------------------|----------------------------------------------------------------------------------------------------------------------------------------------------------------------------------------------------------------------------------------------------------------------------------------------------------------------------------------------------------------------------------------------------------------------------------------------------------------------------------------------------------------------------------------------------------------------------------------------------------------------------------------------------------------------------------------------------------------------------------------------------------------------------------------------------------------------------------------------------------------------------------|----|--------|---------|--------------------|--|--|-----------|------------|--------------|---------|-------|--|----|---|
|                                                                                                                                                    | Interv                         | Control       |                                                                                           |                                                                                                                                                     |                                                                                                                                                                                                                                                                                                                                                                                                                                                                                                                                                                                                                                                                     |                                                                                                                                           |                                                                                                                                                 |                                                                                                                                                                                                                                                                                             |                                                                                                                                                                                                                                                                                                                                                                                                                                                                                                                                                                                                                                                                                                                                                                                                                                                                                  |    |        |         |                    |  |  |           |            |              |         |       |  |    |   |
| After intervention                                                                                                                                 |                                |               |                                                                                           |                                                                                                                                                     |                                                                                                                                                                                                                                                                                                                                                                                                                                                                                                                                                                                                                                                                     |                                                                                                                                           |                                                                                                                                                 |                                                                                                                                                                                                                                                                                             |                                                                                                                                                                                                                                                                                                                                                                                                                                                                                                                                                                                                                                                                                                                                                                                                                                                                                  |    |        |         |                    |  |  |           |            |              |         |       |  |    |   |
| Mean (SD)                                                                                                                                          | 137 (15.2)                     | 102.3 (25.6)  |                                                                                           |                                                                                                                                                     |                                                                                                                                                                                                                                                                                                                                                                                                                                                                                                                                                                                                                                                                     |                                                                                                                                           |                                                                                                                                                 |                                                                                                                                                                                                                                                                                             |                                                                                                                                                                                                                                                                                                                                                                                                                                                                                                                                                                                                                                                                                                                                                                                                                                                                                  |    |        |         |                    |  |  |           |            |              |         |       |  |    |   |
| p-value                                                                                                                                            | 0.001                          |               |                                                                                           |                                                                                                                                                     |                                                                                                                                                                                                                                                                                                                                                                                                                                                                                                                                                                                                                                                                     |                                                                                                                                           |                                                                                                                                                 |                                                                                                                                                                                                                                                                                             |                                                                                                                                                                                                                                                                                                                                                                                                                                                                                                                                                                                                                                                                                                                                                                                                                                                                                  |    |        |         |                    |  |  |           |            |              |         |       |  |    |   |
| 22<br>23<br>24<br>25<br>26<br>27<br>28<br>29<br>30<br>31<br>32<br>33<br>34<br>35<br>36<br>37<br>38<br>39<br>40<br>41<br>42<br>43<br>44<br>45<br>46 | 3. Garingo et al. (2016), USA  | Not stated /9 | 23-39 / level III                                                                         | Non-randomised, Convenience sampling.<br><br><i>Group level effect:</i><br>Intervention/ control groups<br><br>Post-intervention group testing only | <b>Intervention: Tele-rounding.</b><br><br>Infants of intervention parents were cared for by an OFFSN (off site neonatologist) who was present via a remote-controlled robot. The OFFSN assessed infants via the robot's integrated stethoscope, with assistance from the nursing staff. During routine hours the OFFSN was called to discuss any issues with the patient. Emergencies/out of hours were covered by an ONSN (on site neonatologist).<br><br><b>Control:</b> Infants of control parents received ONSN care. The attending neonatologist made daily patient rounds with the NICU team. After patient rounds, the NICU staff, under the supervision of | <b>Satisfaction with telemedicine</b>                                                                                                     | During babies' admission (once)<br><br>- At the time of discharge<br><br>No pre-intervention parent satisfaction data available for comparison. | <i>Satisfaction questionnaire</i><br><br><b>Validation:</b> No content validity or reliability testing reported.<br><br><b>Number of questions:</b> not stated.<br><br>Likert (1 excellent-5 very poor).                                                                                    | <b>Only the intervention group was assessed and only post-intervention.</b><br><br>The authors reported that the parents surveyed were "satisfied with their experience. 100% responded that they felt comfortable talking to the OFFSN on the mobile robot and would allow their infant or themselves to be cared for by a physician via telemedicine in the future."                                                                                                                                                                                                                                                                                                                                                                                                                                                                                                           | No | 4      |         |                    |  |  |           |            |              |         |       |  |    |   |

|                  |                                 |                                                  |                                    |                                                                                                   |                                                                                                                                                                                                                                                                                                                                                                                                                                                                                                                                                                                                                    |                                                                                                                                                                                                  |                                                                                                                                                                                                               |                                                                                                                                                                                                                                                                                                                                                                                                                                                                                                                                                                                                                                                                                                                                                                                                                                                           |                                                                                                                                                                                                                                                                                                                                                                                                                                                                                                                                                                                                                                                                                                                                                                                                                                                                                                                                                                                                                                                                                                                                                                    |  |                 |                |                  |           |           |                |      |  |           |          |
|------------------|---------------------------------|--------------------------------------------------|------------------------------------|---------------------------------------------------------------------------------------------------|--------------------------------------------------------------------------------------------------------------------------------------------------------------------------------------------------------------------------------------------------------------------------------------------------------------------------------------------------------------------------------------------------------------------------------------------------------------------------------------------------------------------------------------------------------------------------------------------------------------------|--------------------------------------------------------------------------------------------------------------------------------------------------------------------------------------------------|---------------------------------------------------------------------------------------------------------------------------------------------------------------------------------------------------------------|-----------------------------------------------------------------------------------------------------------------------------------------------------------------------------------------------------------------------------------------------------------------------------------------------------------------------------------------------------------------------------------------------------------------------------------------------------------------------------------------------------------------------------------------------------------------------------------------------------------------------------------------------------------------------------------------------------------------------------------------------------------------------------------------------------------------------------------------------------------|--------------------------------------------------------------------------------------------------------------------------------------------------------------------------------------------------------------------------------------------------------------------------------------------------------------------------------------------------------------------------------------------------------------------------------------------------------------------------------------------------------------------------------------------------------------------------------------------------------------------------------------------------------------------------------------------------------------------------------------------------------------------------------------------------------------------------------------------------------------------------------------------------------------------------------------------------------------------------------------------------------------------------------------------------------------------------------------------------------------------------------------------------------------------|--|-----------------|----------------|------------------|-----------|-----------|----------------|------|--|-----------|----------|
|                  |                                 |                                                  |                                    | the attending neonatologist implemented the care plan.                                            |                                                                                                                                                                                                                                                                                                                                                                                                                                                                                                                                                                                                                    |                                                                                                                                                                                                  |                                                                                                                                                                                                               |                                                                                                                                                                                                                                                                                                                                                                                                                                                                                                                                                                                                                                                                                                                                                                                                                                                           |                                                                                                                                                                                                                                                                                                                                                                                                                                                                                                                                                                                                                                                                                                                                                                                                                                                                                                                                                                                                                                                                                                                                                                    |  |                 |                |                  |           |           |                |      |  |           |          |
| 1                |                                 |                                                  |                                    |                                                                                                   |                                                                                                                                                                                                                                                                                                                                                                                                                                                                                                                                                                                                                    |                                                                                                                                                                                                  |                                                                                                                                                                                                               |                                                                                                                                                                                                                                                                                                                                                                                                                                                                                                                                                                                                                                                                                                                                                                                                                                                           |                                                                                                                                                                                                                                                                                                                                                                                                                                                                                                                                                                                                                                                                                                                                                                                                                                                                                                                                                                                                                                                                                                                                                                    |  |                 |                |                  |           |           |                |      |  |           |          |
| 2                |                                 |                                                  |                                    |                                                                                                   |                                                                                                                                                                                                                                                                                                                                                                                                                                                                                                                                                                                                                    |                                                                                                                                                                                                  |                                                                                                                                                                                                               |                                                                                                                                                                                                                                                                                                                                                                                                                                                                                                                                                                                                                                                                                                                                                                                                                                                           |                                                                                                                                                                                                                                                                                                                                                                                                                                                                                                                                                                                                                                                                                                                                                                                                                                                                                                                                                                                                                                                                                                                                                                    |  |                 |                |                  |           |           |                |      |  |           |          |
| 3                |                                 |                                                  |                                    |                                                                                                   |                                                                                                                                                                                                                                                                                                                                                                                                                                                                                                                                                                                                                    |                                                                                                                                                                                                  |                                                                                                                                                                                                               |                                                                                                                                                                                                                                                                                                                                                                                                                                                                                                                                                                                                                                                                                                                                                                                                                                                           |                                                                                                                                                                                                                                                                                                                                                                                                                                                                                                                                                                                                                                                                                                                                                                                                                                                                                                                                                                                                                                                                                                                                                                    |  |                 |                |                  |           |           |                |      |  |           |          |
| 4                | 4. Globus et al. (2016), Israel | Mothers and fathers /Total surveys returned: 178 | ~40% in each group <32 / level III | Non-randomised, Convenience sampling.<br><br><i>Unit level effect:</i> Two different time periods | <b>Intervention: SMSi-Short Message Services Implementation.</b><br><br>Parents were updated daily regarding the health status of their infant via SMS (short-message-services) from the Electronic Patient Record. All SMS messages were sent at 09:00am, including one-sentence sections with updated information (e.g. location of the infant's crib and current weight). Information regarding acute events/deterioration of the infant's medical condition was not included in the SMS, but was delivered personally to the parents in real time.<br><br><u>Control:</u> Routine care pre-SMS implementation. | <b>1. Parent satisfaction related to parent communication with the medical staff</b><br><br><b>2. Overall parent satisfaction with treatment and staff attitudes throughout hospitalisation.</b> | During babies' admission (once)<br><br>- pre-SMS cohort and post-SMS cohort<br><br>No pre-intervention parent satisfaction data available for comparison (different parent groups pre and post intervention). | <i>Satisfaction questionnaire</i><br><br>The "Parents' attitudes regarding their experience during their infants' hospitalisation in the NICU" questionnaire was used, as well as selected items from a literature review of similar questionnaires, including that by York Hospital and by Conner and Nelson.<br><br><u>Validation:</u> No content validity or reliability testing reported.<br><br>Selected items related to four aspects of the NICU experience. 2 out of 4 directly assessed parent satisfaction:<br><br>1. Parental assessment of their communication with the medical staff.<br><br>Likert scale (1 do not agree at all-5 strongly agree)<br><br>2. Overall satisfaction with treatment and staff attitudes throughout hospitalisation.<br><br>Visual analog scale (scores range 0-10). Higher scores reflect greater satisfaction. | Overall, in both periods, parents expressed a high degree of satisfaction regarding the medical treatment, the information given and the communication with the medical staff. Overall satisfaction with treatment and with staff attitudes throughout hospitalisation was slightly greater in the post-SMS cohort but did not reach statistical significance.<br><br><b>In the post-SMS cohort, a statistically significant improvement was noted regarding physician availability and patience, parental feelings of comfort in approaching the physicians and nurses, and regularly receiving information regarding the infants' medical status from the physicians.</b><br><br><table border="0"> <tr> <td></td> <td><b>Post SMS</b></td> <td><b>Pre SMS</b></td> </tr> <tr> <td><b>Mean (SD)</b></td> <td>4.1 (1.0)</td> <td>3.7 (1.3)</td> </tr> <tr> <td><b>p-value</b></td> <td colspan="2">0.03</td> </tr> </table><br><i>Specific question: "I was pleased with the frequency with which I received information regarding my infant".</i><br><br>Although improvement in all other categories was documented, it did not reach statistical significance. |  | <b>Post SMS</b> | <b>Pre SMS</b> | <b>Mean (SD)</b> | 4.1 (1.0) | 3.7 (1.3) | <b>p-value</b> | 0.03 |  | <b>No</b> | <b>1</b> |
|                  | <b>Post SMS</b>                 | <b>Pre SMS</b>                                   |                                    |                                                                                                   |                                                                                                                                                                                                                                                                                                                                                                                                                                                                                                                                                                                                                    |                                                                                                                                                                                                  |                                                                                                                                                                                                               |                                                                                                                                                                                                                                                                                                                                                                                                                                                                                                                                                                                                                                                                                                                                                                                                                                                           |                                                                                                                                                                                                                                                                                                                                                                                                                                                                                                                                                                                                                                                                                                                                                                                                                                                                                                                                                                                                                                                                                                                                                                    |  |                 |                |                  |           |           |                |      |  |           |          |
| <b>Mean (SD)</b> | 4.1 (1.0)                       | 3.7 (1.3)                                        |                                    |                                                                                                   |                                                                                                                                                                                                                                                                                                                                                                                                                                                                                                                                                                                                                    |                                                                                                                                                                                                  |                                                                                                                                                                                                               |                                                                                                                                                                                                                                                                                                                                                                                                                                                                                                                                                                                                                                                                                                                                                                                                                                                           |                                                                                                                                                                                                                                                                                                                                                                                                                                                                                                                                                                                                                                                                                                                                                                                                                                                                                                                                                                                                                                                                                                                                                                    |  |                 |                |                  |           |           |                |      |  |           |          |
| <b>p-value</b>   | 0.03                            |                                                  |                                    |                                                                                                   |                                                                                                                                                                                                                                                                                                                                                                                                                                                                                                                                                                                                                    |                                                                                                                                                                                                  |                                                                                                                                                                                                               |                                                                                                                                                                                                                                                                                                                                                                                                                                                                                                                                                                                                                                                                                                                                                                                                                                                           |                                                                                                                                                                                                                                                                                                                                                                                                                                                                                                                                                                                                                                                                                                                                                                                                                                                                                                                                                                                                                                                                                                                                                                    |  |                 |                |                  |           |           |                |      |  |           |          |
| 5                |                                 |                                                  |                                    |                                                                                                   |                                                                                                                                                                                                                                                                                                                                                                                                                                                                                                                                                                                                                    |                                                                                                                                                                                                  |                                                                                                                                                                                                               |                                                                                                                                                                                                                                                                                                                                                                                                                                                                                                                                                                                                                                                                                                                                                                                                                                                           |                                                                                                                                                                                                                                                                                                                                                                                                                                                                                                                                                                                                                                                                                                                                                                                                                                                                                                                                                                                                                                                                                                                                                                    |  |                 |                |                  |           |           |                |      |  |           |          |
| 6                |                                 |                                                  |                                    |                                                                                                   |                                                                                                                                                                                                                                                                                                                                                                                                                                                                                                                                                                                                                    |                                                                                                                                                                                                  |                                                                                                                                                                                                               |                                                                                                                                                                                                                                                                                                                                                                                                                                                                                                                                                                                                                                                                                                                                                                                                                                                           |                                                                                                                                                                                                                                                                                                                                                                                                                                                                                                                                                                                                                                                                                                                                                                                                                                                                                                                                                                                                                                                                                                                                                                    |  |                 |                |                  |           |           |                |      |  |           |          |
| 7                |                                 |                                                  |                                    |                                                                                                   |                                                                                                                                                                                                                                                                                                                                                                                                                                                                                                                                                                                                                    |                                                                                                                                                                                                  |                                                                                                                                                                                                               |                                                                                                                                                                                                                                                                                                                                                                                                                                                                                                                                                                                                                                                                                                                                                                                                                                                           |                                                                                                                                                                                                                                                                                                                                                                                                                                                                                                                                                                                                                                                                                                                                                                                                                                                                                                                                                                                                                                                                                                                                                                    |  |                 |                |                  |           |           |                |      |  |           |          |
| 8                |                                 |                                                  |                                    |                                                                                                   |                                                                                                                                                                                                                                                                                                                                                                                                                                                                                                                                                                                                                    |                                                                                                                                                                                                  |                                                                                                                                                                                                               |                                                                                                                                                                                                                                                                                                                                                                                                                                                                                                                                                                                                                                                                                                                                                                                                                                                           |                                                                                                                                                                                                                                                                                                                                                                                                                                                                                                                                                                                                                                                                                                                                                                                                                                                                                                                                                                                                                                                                                                                                                                    |  |                 |                |                  |           |           |                |      |  |           |          |
| 9                |                                 |                                                  |                                    |                                                                                                   |                                                                                                                                                                                                                                                                                                                                                                                                                                                                                                                                                                                                                    |                                                                                                                                                                                                  |                                                                                                                                                                                                               |                                                                                                                                                                                                                                                                                                                                                                                                                                                                                                                                                                                                                                                                                                                                                                                                                                                           |                                                                                                                                                                                                                                                                                                                                                                                                                                                                                                                                                                                                                                                                                                                                                                                                                                                                                                                                                                                                                                                                                                                                                                    |  |                 |                |                  |           |           |                |      |  |           |          |
| 10               |                                 |                                                  |                                    |                                                                                                   |                                                                                                                                                                                                                                                                                                                                                                                                                                                                                                                                                                                                                    |                                                                                                                                                                                                  |                                                                                                                                                                                                               |                                                                                                                                                                                                                                                                                                                                                                                                                                                                                                                                                                                                                                                                                                                                                                                                                                                           |                                                                                                                                                                                                                                                                                                                                                                                                                                                                                                                                                                                                                                                                                                                                                                                                                                                                                                                                                                                                                                                                                                                                                                    |  |                 |                |                  |           |           |                |      |  |           |          |
| 11               |                                 |                                                  |                                    |                                                                                                   |                                                                                                                                                                                                                                                                                                                                                                                                                                                                                                                                                                                                                    |                                                                                                                                                                                                  |                                                                                                                                                                                                               |                                                                                                                                                                                                                                                                                                                                                                                                                                                                                                                                                                                                                                                                                                                                                                                                                                                           |                                                                                                                                                                                                                                                                                                                                                                                                                                                                                                                                                                                                                                                                                                                                                                                                                                                                                                                                                                                                                                                                                                                                                                    |  |                 |                |                  |           |           |                |      |  |           |          |
| 12               |                                 |                                                  |                                    |                                                                                                   |                                                                                                                                                                                                                                                                                                                                                                                                                                                                                                                                                                                                                    |                                                                                                                                                                                                  |                                                                                                                                                                                                               |                                                                                                                                                                                                                                                                                                                                                                                                                                                                                                                                                                                                                                                                                                                                                                                                                                                           |                                                                                                                                                                                                                                                                                                                                                                                                                                                                                                                                                                                                                                                                                                                                                                                                                                                                                                                                                                                                                                                                                                                                                                    |  |                 |                |                  |           |           |                |      |  |           |          |
| 13               |                                 |                                                  |                                    |                                                                                                   |                                                                                                                                                                                                                                                                                                                                                                                                                                                                                                                                                                                                                    |                                                                                                                                                                                                  |                                                                                                                                                                                                               |                                                                                                                                                                                                                                                                                                                                                                                                                                                                                                                                                                                                                                                                                                                                                                                                                                                           |                                                                                                                                                                                                                                                                                                                                                                                                                                                                                                                                                                                                                                                                                                                                                                                                                                                                                                                                                                                                                                                                                                                                                                    |  |                 |                |                  |           |           |                |      |  |           |          |
| 14               |                                 |                                                  |                                    |                                                                                                   |                                                                                                                                                                                                                                                                                                                                                                                                                                                                                                                                                                                                                    |                                                                                                                                                                                                  |                                                                                                                                                                                                               |                                                                                                                                                                                                                                                                                                                                                                                                                                                                                                                                                                                                                                                                                                                                                                                                                                                           |                                                                                                                                                                                                                                                                                                                                                                                                                                                                                                                                                                                                                                                                                                                                                                                                                                                                                                                                                                                                                                                                                                                                                                    |  |                 |                |                  |           |           |                |      |  |           |          |
| 15               |                                 |                                                  |                                    |                                                                                                   |                                                                                                                                                                                                                                                                                                                                                                                                                                                                                                                                                                                                                    |                                                                                                                                                                                                  |                                                                                                                                                                                                               |                                                                                                                                                                                                                                                                                                                                                                                                                                                                                                                                                                                                                                                                                                                                                                                                                                                           |                                                                                                                                                                                                                                                                                                                                                                                                                                                                                                                                                                                                                                                                                                                                                                                                                                                                                                                                                                                                                                                                                                                                                                    |  |                 |                |                  |           |           |                |      |  |           |          |
| 16               |                                 |                                                  |                                    |                                                                                                   |                                                                                                                                                                                                                                                                                                                                                                                                                                                                                                                                                                                                                    |                                                                                                                                                                                                  |                                                                                                                                                                                                               |                                                                                                                                                                                                                                                                                                                                                                                                                                                                                                                                                                                                                                                                                                                                                                                                                                                           |                                                                                                                                                                                                                                                                                                                                                                                                                                                                                                                                                                                                                                                                                                                                                                                                                                                                                                                                                                                                                                                                                                                                                                    |  |                 |                |                  |           |           |                |      |  |           |          |
| 17               |                                 |                                                  |                                    |                                                                                                   |                                                                                                                                                                                                                                                                                                                                                                                                                                                                                                                                                                                                                    |                                                                                                                                                                                                  |                                                                                                                                                                                                               |                                                                                                                                                                                                                                                                                                                                                                                                                                                                                                                                                                                                                                                                                                                                                                                                                                                           |                                                                                                                                                                                                                                                                                                                                                                                                                                                                                                                                                                                                                                                                                                                                                                                                                                                                                                                                                                                                                                                                                                                                                                    |  |                 |                |                  |           |           |                |      |  |           |          |
| 18               |                                 |                                                  |                                    |                                                                                                   |                                                                                                                                                                                                                                                                                                                                                                                                                                                                                                                                                                                                                    |                                                                                                                                                                                                  |                                                                                                                                                                                                               |                                                                                                                                                                                                                                                                                                                                                                                                                                                                                                                                                                                                                                                                                                                                                                                                                                                           |                                                                                                                                                                                                                                                                                                                                                                                                                                                                                                                                                                                                                                                                                                                                                                                                                                                                                                                                                                                                                                                                                                                                                                    |  |                 |                |                  |           |           |                |      |  |           |          |
| 19               |                                 |                                                  |                                    |                                                                                                   |                                                                                                                                                                                                                                                                                                                                                                                                                                                                                                                                                                                                                    |                                                                                                                                                                                                  |                                                                                                                                                                                                               |                                                                                                                                                                                                                                                                                                                                                                                                                                                                                                                                                                                                                                                                                                                                                                                                                                                           |                                                                                                                                                                                                                                                                                                                                                                                                                                                                                                                                                                                                                                                                                                                                                                                                                                                                                                                                                                                                                                                                                                                                                                    |  |                 |                |                  |           |           |                |      |  |           |          |
| 20               |                                 |                                                  |                                    |                                                                                                   |                                                                                                                                                                                                                                                                                                                                                                                                                                                                                                                                                                                                                    |                                                                                                                                                                                                  |                                                                                                                                                                                                               |                                                                                                                                                                                                                                                                                                                                                                                                                                                                                                                                                                                                                                                                                                                                                                                                                                                           |                                                                                                                                                                                                                                                                                                                                                                                                                                                                                                                                                                                                                                                                                                                                                                                                                                                                                                                                                                                                                                                                                                                                                                    |  |                 |                |                  |           |           |                |      |  |           |          |
| 21               |                                 |                                                  |                                    |                                                                                                   |                                                                                                                                                                                                                                                                                                                                                                                                                                                                                                                                                                                                                    |                                                                                                                                                                                                  |                                                                                                                                                                                                               |                                                                                                                                                                                                                                                                                                                                                                                                                                                                                                                                                                                                                                                                                                                                                                                                                                                           |                                                                                                                                                                                                                                                                                                                                                                                                                                                                                                                                                                                                                                                                                                                                                                                                                                                                                                                                                                                                                                                                                                                                                                    |  |                 |                |                  |           |           |                |      |  |           |          |
| 22               |                                 |                                                  |                                    |                                                                                                   |                                                                                                                                                                                                                                                                                                                                                                                                                                                                                                                                                                                                                    |                                                                                                                                                                                                  |                                                                                                                                                                                                               |                                                                                                                                                                                                                                                                                                                                                                                                                                                                                                                                                                                                                                                                                                                                                                                                                                                           |                                                                                                                                                                                                                                                                                                                                                                                                                                                                                                                                                                                                                                                                                                                                                                                                                                                                                                                                                                                                                                                                                                                                                                    |  |                 |                |                  |           |           |                |      |  |           |          |
| 23               |                                 |                                                  |                                    |                                                                                                   |                                                                                                                                                                                                                                                                                                                                                                                                                                                                                                                                                                                                                    |                                                                                                                                                                                                  |                                                                                                                                                                                                               |                                                                                                                                                                                                                                                                                                                                                                                                                                                                                                                                                                                                                                                                                                                                                                                                                                                           |                                                                                                                                                                                                                                                                                                                                                                                                                                                                                                                                                                                                                                                                                                                                                                                                                                                                                                                                                                                                                                                                                                                                                                    |  |                 |                |                  |           |           |                |      |  |           |          |
| 24               |                                 |                                                  |                                    |                                                                                                   |                                                                                                                                                                                                                                                                                                                                                                                                                                                                                                                                                                                                                    |                                                                                                                                                                                                  |                                                                                                                                                                                                               |                                                                                                                                                                                                                                                                                                                                                                                                                                                                                                                                                                                                                                                                                                                                                                                                                                                           |                                                                                                                                                                                                                                                                                                                                                                                                                                                                                                                                                                                                                                                                                                                                                                                                                                                                                                                                                                                                                                                                                                                                                                    |  |                 |                |                  |           |           |                |      |  |           |          |
| 25               |                                 |                                                  |                                    |                                                                                                   |                                                                                                                                                                                                                                                                                                                                                                                                                                                                                                                                                                                                                    |                                                                                                                                                                                                  |                                                                                                                                                                                                               |                                                                                                                                                                                                                                                                                                                                                                                                                                                                                                                                                                                                                                                                                                                                                                                                                                                           |                                                                                                                                                                                                                                                                                                                                                                                                                                                                                                                                                                                                                                                                                                                                                                                                                                                                                                                                                                                                                                                                                                                                                                    |  |                 |                |                  |           |           |                |      |  |           |          |
| 26               |                                 |                                                  |                                    |                                                                                                   |                                                                                                                                                                                                                                                                                                                                                                                                                                                                                                                                                                                                                    |                                                                                                                                                                                                  |                                                                                                                                                                                                               |                                                                                                                                                                                                                                                                                                                                                                                                                                                                                                                                                                                                                                                                                                                                                                                                                                                           |                                                                                                                                                                                                                                                                                                                                                                                                                                                                                                                                                                                                                                                                                                                                                                                                                                                                                                                                                                                                                                                                                                                                                                    |  |                 |                |                  |           |           |                |      |  |           |          |
| 27               |                                 |                                                  |                                    |                                                                                                   |                                                                                                                                                                                                                                                                                                                                                                                                                                                                                                                                                                                                                    |                                                                                                                                                                                                  |                                                                                                                                                                                                               |                                                                                                                                                                                                                                                                                                                                                                                                                                                                                                                                                                                                                                                                                                                                                                                                                                                           |                                                                                                                                                                                                                                                                                                                                                                                                                                                                                                                                                                                                                                                                                                                                                                                                                                                                                                                                                                                                                                                                                                                                                                    |  |                 |                |                  |           |           |                |      |  |           |          |
| 28               |                                 |                                                  |                                    |                                                                                                   |                                                                                                                                                                                                                                                                                                                                                                                                                                                                                                                                                                                                                    |                                                                                                                                                                                                  |                                                                                                                                                                                                               |                                                                                                                                                                                                                                                                                                                                                                                                                                                                                                                                                                                                                                                                                                                                                                                                                                                           |                                                                                                                                                                                                                                                                                                                                                                                                                                                                                                                                                                                                                                                                                                                                                                                                                                                                                                                                                                                                                                                                                                                                                                    |  |                 |                |                  |           |           |                |      |  |           |          |
| 29               |                                 |                                                  |                                    |                                                                                                   |                                                                                                                                                                                                                                                                                                                                                                                                                                                                                                                                                                                                                    |                                                                                                                                                                                                  |                                                                                                                                                                                                               |                                                                                                                                                                                                                                                                                                                                                                                                                                                                                                                                                                                                                                                                                                                                                                                                                                                           |                                                                                                                                                                                                                                                                                                                                                                                                                                                                                                                                                                                                                                                                                                                                                                                                                                                                                                                                                                                                                                                                                                                                                                    |  |                 |                |                  |           |           |                |      |  |           |          |
| 30               |                                 |                                                  |                                    |                                                                                                   |                                                                                                                                                                                                                                                                                                                                                                                                                                                                                                                                                                                                                    |                                                                                                                                                                                                  |                                                                                                                                                                                                               |                                                                                                                                                                                                                                                                                                                                                                                                                                                                                                                                                                                                                                                                                                                                                                                                                                                           |                                                                                                                                                                                                                                                                                                                                                                                                                                                                                                                                                                                                                                                                                                                                                                                                                                                                                                                                                                                                                                                                                                                                                                    |  |                 |                |                  |           |           |                |      |  |           |          |
| 31               |                                 |                                                  |                                    |                                                                                                   |                                                                                                                                                                                                                                                                                                                                                                                                                                                                                                                                                                                                                    |                                                                                                                                                                                                  |                                                                                                                                                                                                               |                                                                                                                                                                                                                                                                                                                                                                                                                                                                                                                                                                                                                                                                                                                                                                                                                                                           |                                                                                                                                                                                                                                                                                                                                                                                                                                                                                                                                                                                                                                                                                                                                                                                                                                                                                                                                                                                                                                                                                                                                                                    |  |                 |                |                  |           |           |                |      |  |           |          |
| 32               |                                 |                                                  |                                    |                                                                                                   |                                                                                                                                                                                                                                                                                                                                                                                                                                                                                                                                                                                                                    |                                                                                                                                                                                                  |                                                                                                                                                                                                               |                                                                                                                                                                                                                                                                                                                                                                                                                                                                                                                                                                                                                                                                                                                                                                                                                                                           |                                                                                                                                                                                                                                                                                                                                                                                                                                                                                                                                                                                                                                                                                                                                                                                                                                                                                                                                                                                                                                                                                                                                                                    |  |                 |                |                  |           |           |                |      |  |           |          |
| 33               |                                 |                                                  |                                    |                                                                                                   |                                                                                                                                                                                                                                                                                                                                                                                                                                                                                                                                                                                                                    |                                                                                                                                                                                                  |                                                                                                                                                                                                               |                                                                                                                                                                                                                                                                                                                                                                                                                                                                                                                                                                                                                                                                                                                                                                                                                                                           |                                                                                                                                                                                                                                                                                                                                                                                                                                                                                                                                                                                                                                                                                                                                                                                                                                                                                                                                                                                                                                                                                                                                                                    |  |                 |                |                  |           |           |                |      |  |           |          |
| 34               |                                 |                                                  |                                    |                                                                                                   |                                                                                                                                                                                                                                                                                                                                                                                                                                                                                                                                                                                                                    |                                                                                                                                                                                                  |                                                                                                                                                                                                               |                                                                                                                                                                                                                                                                                                                                                                                                                                                                                                                                                                                                                                                                                                                                                                                                                                                           |                                                                                                                                                                                                                                                                                                                                                                                                                                                                                                                                                                                                                                                                                                                                                                                                                                                                                                                                                                                                                                                                                                                                                                    |  |                 |                |                  |           |           |                |      |  |           |          |
| 35               |                                 |                                                  |                                    |                                                                                                   |                                                                                                                                                                                                                                                                                                                                                                                                                                                                                                                                                                                                                    |                                                                                                                                                                                                  |                                                                                                                                                                                                               |                                                                                                                                                                                                                                                                                                                                                                                                                                                                                                                                                                                                                                                                                                                                                                                                                                                           |                                                                                                                                                                                                                                                                                                                                                                                                                                                                                                                                                                                                                                                                                                                                                                                                                                                                                                                                                                                                                                                                                                                                                                    |  |                 |                |                  |           |           |                |      |  |           |          |
| 36               |                                 |                                                  |                                    |                                                                                                   |                                                                                                                                                                                                                                                                                                                                                                                                                                                                                                                                                                                                                    |                                                                                                                                                                                                  |                                                                                                                                                                                                               |                                                                                                                                                                                                                                                                                                                                                                                                                                                                                                                                                                                                                                                                                                                                                                                                                                                           |                                                                                                                                                                                                                                                                                                                                                                                                                                                                                                                                                                                                                                                                                                                                                                                                                                                                                                                                                                                                                                                                                                                                                                    |  |                 |                |                  |           |           |                |      |  |           |          |
| 37               |                                 |                                                  |                                    |                                                                                                   |                                                                                                                                                                                                                                                                                                                                                                                                                                                                                                                                                                                                                    |                                                                                                                                                                                                  |                                                                                                                                                                                                               |                                                                                                                                                                                                                                                                                                                                                                                                                                                                                                                                                                                                                                                                                                                                                                                                                                                           |                                                                                                                                                                                                                                                                                                                                                                                                                                                                                                                                                                                                                                                                                                                                                                                                                                                                                                                                                                                                                                                                                                                                                                    |  |                 |                |                  |           |           |                |      |  |           |          |
| 38               |                                 |                                                  |                                    |                                                                                                   |                                                                                                                                                                                                                                                                                                                                                                                                                                                                                                                                                                                                                    |                                                                                                                                                                                                  |                                                                                                                                                                                                               |                                                                                                                                                                                                                                                                                                                                                                                                                                                                                                                                                                                                                                                                                                                                                                                                                                                           |                                                                                                                                                                                                                                                                                                                                                                                                                                                                                                                                                                                                                                                                                                                                                                                                                                                                                                                                                                                                                                                                                                                                                                    |  |                 |                |                  |           |           |                |      |  |           |          |
| 39               |                                 |                                                  |                                    |                                                                                                   |                                                                                                                                                                                                                                                                                                                                                                                                                                                                                                                                                                                                                    |                                                                                                                                                                                                  |                                                                                                                                                                                                               |                                                                                                                                                                                                                                                                                                                                                                                                                                                                                                                                                                                                                                                                                                                                                                                                                                                           |                                                                                                                                                                                                                                                                                                                                                                                                                                                                                                                                                                                                                                                                                                                                                                                                                                                                                                                                                                                                                                                                                                                                                                    |  |                 |                |                  |           |           |                |      |  |           |          |
| 40               |                                 |                                                  |                                    |                                                                                                   |                                                                                                                                                                                                                                                                                                                                                                                                                                                                                                                                                                                                                    |                                                                                                                                                                                                  |                                                                                                                                                                                                               |                                                                                                                                                                                                                                                                                                                                                                                                                                                                                                                                                                                                                                                                                                                                                                                                                                                           |                                                                                                                                                                                                                                                                                                                                                                                                                                                                                                                                                                                                                                                                                                                                                                                                                                                                                                                                                                                                                                                                                                                                                                    |  |                 |                |                  |           |           |                |      |  |           |          |
| 41               |                                 |                                                  |                                    |                                                                                                   |                                                                                                                                                                                                                                                                                                                                                                                                                                                                                                                                                                                                                    |                                                                                                                                                                                                  |                                                                                                                                                                                                               |                                                                                                                                                                                                                                                                                                                                                                                                                                                                                                                                                                                                                                                                                                                                                                                                                                                           |                                                                                                                                                                                                                                                                                                                                                                                                                                                                                                                                                                                                                                                                                                                                                                                                                                                                                                                                                                                                                                                                                                                                                                    |  |                 |                |                  |           |           |                |      |  |           |          |
| 42               |                                 |                                                  |                                    |                                                                                                   |                                                                                                                                                                                                                                                                                                                                                                                                                                                                                                                                                                                                                    |                                                                                                                                                                                                  |                                                                                                                                                                                                               |                                                                                                                                                                                                                                                                                                                                                                                                                                                                                                                                                                                                                                                                                                                                                                                                                                                           |                                                                                                                                                                                                                                                                                                                                                                                                                                                                                                                                                                                                                                                                                                                                                                                                                                                                                                                                                                                                                                                                                                                                                                    |  |                 |                |                  |           |           |                |      |  |           |          |
| 43               |                                 |                                                  |                                    |                                                                                                   |                                                                                                                                                                                                                                                                                                                                                                                                                                                                                                                                                                                                                    |                                                                                                                                                                                                  |                                                                                                                                                                                                               |                                                                                                                                                                                                                                                                                                                                                                                                                                                                                                                                                                                                                                                                                                                                                                                                                                                           |                                                                                                                                                                                                                                                                                                                                                                                                                                                                                                                                                                                                                                                                                                                                                                                                                                                                                                                                                                                                                                                                                                                                                                    |  |                 |                |                  |           |           |                |      |  |           |          |
| 44               |                                 |                                                  |                                    |                                                                                                   |                                                                                                                                                                                                                                                                                                                                                                                                                                                                                                                                                                                                                    |                                                                                                                                                                                                  |                                                                                                                                                                                                               |                                                                                                                                                                                                                                                                                                                                                                                                                                                                                                                                                                                                                                                                                                                                                                                                                                                           |                                                                                                                                                                                                                                                                                                                                                                                                                                                                                                                                                                                                                                                                                                                                                                                                                                                                                                                                                                                                                                                                                                                                                                    |  |                 |                |                  |           |           |                |      |  |           |          |
| 45               |                                 |                                                  |                                    |                                                                                                   |                                                                                                                                                                                                                                                                                                                                                                                                                                                                                                                                                                                                                    |                                                                                                                                                                                                  |                                                                                                                                                                                                               |                                                                                                                                                                                                                                                                                                                                                                                                                                                                                                                                                                                                                                                                                                                                                                                                                                                           |                                                                                                                                                                                                                                                                                                                                                                                                                                                                                                                                                                                                                                                                                                                                                                                                                                                                                                                                                                                                                                                                                                                                                                    |  |                 |                |                  |           |           |                |      |  |           |          |
| 46               |                                 |                                                  |                                    |                                                                                                   |                                                                                                                                                                                                                                                                                                                                                                                                                                                                                                                                                                                                                    |                                                                                                                                                                                                  |                                                                                                                                                                                                               |                                                                                                                                                                                                                                                                                                                                                                                                                                                                                                                                                                                                                                                                                                                                                                                                                                                           |                                                                                                                                                                                                                                                                                                                                                                                                                                                                                                                                                                                                                                                                                                                                                                                                                                                                                                                                                                                                                                                                                                                                                                    |  |                 |                |                  |           |           |                |      |  |           |          |

| 1<br>2<br>3<br>4<br>5<br>6<br>7<br>8<br>9<br>10<br>11<br>12<br>13<br>14<br>15<br>16<br>17                            | 5. Kazemian et al. (2016), Iran       | Mothers /220 newborns (assumed 220 mothers) | >37 / level not stated  | Non-randomised, Convenience sampling.<br><br><i>Group level effect:</i> Intervention/control groups<br><br>Post-intervention testing only | <b>Intervention: Rooming-in care.</b><br><br>Mothers and babies were admitted to a different atmosphere to the routine care. This facilitated the mothers and neonates with separate beds along with phototherapy devices and nursing clinical supervision.<br><br><b>Control:</b> The routine care practiced in this neonatal unit supported partial stay of mothers beside their neonates, while sitting on chairs; however, most of the time the mother-infant dyad was separated. | <b>Maternal satisfaction with the neonatal care services and hospital stay comfort</b> | During babies' admission (once)<br><br>-Not stated exactly when<br><br>No pre-intervention parent satisfaction data available for comparison.                                                             | <i>Satisfaction questionnaire</i><br><br><b>Validation:</b> No content validity or reliability testing reported.<br><br>The authors state, "a validated self-made questionnaire was employed, which was filled in by some trained midwives." No further information on validation processes, number of questions or name of the questionnaire was provided.<br><br>Likert (5 very satisfied-1 dissatisfied). | <b>The level of satisfaction was significantly higher in the intervention group, compared to that in the control group.</b><br><br><table border="1"> <thead> <tr> <th></th> <th>Interv</th> <th>Control</th> </tr> </thead> <tbody> <tr> <td>Satisfaction %</td> <td>26.6</td> <td>18.8</td> </tr> </tbody> </table><br><b>p-value</b> 0.027                                                                                                                                                                                                                                                       |                                                                                                                                                                                                             | Interv   | Control | Satisfaction % | 26.6 | 18.8 | <b>No</b> | <b>1</b> |
|----------------------------------------------------------------------------------------------------------------------|---------------------------------------|---------------------------------------------|-------------------------|-------------------------------------------------------------------------------------------------------------------------------------------|---------------------------------------------------------------------------------------------------------------------------------------------------------------------------------------------------------------------------------------------------------------------------------------------------------------------------------------------------------------------------------------------------------------------------------------------------------------------------------------|----------------------------------------------------------------------------------------|-----------------------------------------------------------------------------------------------------------------------------------------------------------------------------------------------------------|--------------------------------------------------------------------------------------------------------------------------------------------------------------------------------------------------------------------------------------------------------------------------------------------------------------------------------------------------------------------------------------------------------------|-----------------------------------------------------------------------------------------------------------------------------------------------------------------------------------------------------------------------------------------------------------------------------------------------------------------------------------------------------------------------------------------------------------------------------------------------------------------------------------------------------------------------------------------------------------------------------------------------------|-------------------------------------------------------------------------------------------------------------------------------------------------------------------------------------------------------------|----------|---------|----------------|------|------|-----------|----------|
|                                                                                                                      | Interv                                | Control                                     |                         |                                                                                                                                           |                                                                                                                                                                                                                                                                                                                                                                                                                                                                                       |                                                                                        |                                                                                                                                                                                                           |                                                                                                                                                                                                                                                                                                                                                                                                              |                                                                                                                                                                                                                                                                                                                                                                                                                                                                                                                                                                                                     |                                                                                                                                                                                                             |          |         |                |      |      |           |          |
| Satisfaction %                                                                                                       | 26.6                                  | 18.8                                        |                         |                                                                                                                                           |                                                                                                                                                                                                                                                                                                                                                                                                                                                                                       |                                                                                        |                                                                                                                                                                                                           |                                                                                                                                                                                                                                                                                                                                                                                                              |                                                                                                                                                                                                                                                                                                                                                                                                                                                                                                                                                                                                     |                                                                                                                                                                                                             |          |         |                |      |      |           |          |
| 18<br>19<br>20<br>21<br>22<br>23<br>24<br>25<br>26<br>27<br>28<br>29<br>30<br>31<br>32<br>33<br>34<br>35<br>36<br>37 | 6. Van de Vijver and Evans (2015), UK | Not stated /105                             | Not stated / not stated | Non-randomised, Convenience sampling.<br><br><i>Unit level effect:</i> Three different time periods                                       | <b>Intervention: Baby diary.</b><br><br>Each parent received a communication diary on their infant's admission to the unit. Staff wrote-in infant status updates and kept an infant interaction log with parents. Parents wrote in memories and questions for staff to address during face-to-face communication.<br><br><b>Control:</b> Routine care, before implementation of the diaries.                                                                                          | <b>Satisfaction with communication from neonatal staff</b>                             | During babies' admission (three times)<br><br>- On the day of babies' discharge at study baseline<br><br>- On the day of babies' discharge at 1 month<br><br>On the day of babies' discharge at 15 months | <i>Satisfaction questionnaire</i><br><br>The study team designed a questionnaire, based on the Department of Health and the National Institute for Health and Care Excellence (NICE) quality standards for specialist neonatal care.<br><br><b>Validation:</b> No content validity or reliability testing reported.<br><br>5 questions ("yes or no")                                                         | <b>Small numbers. No data indicating statistical analysis conducted or evidence of statistically significant results.</b><br><br>"I was receiving regular communication from staff"<br>94% - 1 month post diary cohort<br>93% - 15 months post diary cohort<br>77% - pre diary cohort<br><br>"My questions and concerns were being addressed"<br>100% - 1 month post diary cohort<br>93% - 15 months post diary cohort<br>91% - pre diary cohort<br><br>"I feel more involved in my baby's care"<br>92% - 1 month post diary cohort<br>100% - 15 months post diary cohort<br>88% - pre diary cohort | <b>Yes.</b><br><br>The intervention concept was created by the project leaders following analysis of baseline survey results and used after multi-disciplinary input and discussion with staff and parents. | <b>3</b> |         |                |      |      |           |          |
| 38<br>39<br>40<br>41<br>42<br>43<br>44<br>45<br>46                                                                   | 7. Voos and Park. (2014), USA         | Not stated / 62                             | Not stated / level III  | Non-randomised, Convenience sampling.<br><br><i>Unit level effect:</i> Two different time                                                 | <b>Intervention: OU (Open Unit) policy.</b><br><br>Parents were allowed access to their baby 24 hours a day, 7 days a week.<br><br><b>Control:</b> Parents pre-OU                                                                                                                                                                                                                                                                                                                     | <b>Parent satisfaction with how much time parents get to spend with their baby</b>     | After babies were discharged (once)<br><br>- After pre-OU parents were discharged<br>After post-OU parents were                                                                                           | <i>Single question (From a validated questionnaire)</i><br><br>The question "Did you get to spend as much time as you wanted with your baby?" was used from the NRC (National Research Corporation) Picker parent                                                                                                                                                                                            | <b>Small numbers. No data indicating statistical analysis conducted or evidence of statistically significant results.</b><br><br>"Did you get to spend as much time as you wanted with your baby?" Yes.                                                                                                                                                                                                                                                                                                                                                                                             | <b>Yes.</b><br><br>The NICU has a Family-centered care committee including                                                                                                                                  | <b>3</b> |         |                |      |      |           |          |

|                                                                                                                                                 |                             |                                                                              |                                    |                                                                                                                                                                                                |                                                                                                                                                                                                                                                                                                                                                                                                                                                                                                                                                                    |                                                         |                                                                                                                                                                                                    |                                                                                                                                                                                                                                                                                                             |                                                                                                                                                                                                                                                                                                                                                                                                                                                                                                           |    |   |
|-------------------------------------------------------------------------------------------------------------------------------------------------|-----------------------------|------------------------------------------------------------------------------|------------------------------------|------------------------------------------------------------------------------------------------------------------------------------------------------------------------------------------------|--------------------------------------------------------------------------------------------------------------------------------------------------------------------------------------------------------------------------------------------------------------------------------------------------------------------------------------------------------------------------------------------------------------------------------------------------------------------------------------------------------------------------------------------------------------------|---------------------------------------------------------|----------------------------------------------------------------------------------------------------------------------------------------------------------------------------------------------------|-------------------------------------------------------------------------------------------------------------------------------------------------------------------------------------------------------------------------------------------------------------------------------------------------------------|-----------------------------------------------------------------------------------------------------------------------------------------------------------------------------------------------------------------------------------------------------------------------------------------------------------------------------------------------------------------------------------------------------------------------------------------------------------------------------------------------------------|----|---|
|                                                                                                                                                 |                             |                                                                              | periods                            | implementation received routine care. The unit was closed to parents during nurse change of shift in mornings and evenings.                                                                    |                                                                                                                                                                                                                                                                                                                                                                                                                                                                                                                                                                    | discharged                                              | survey.<br>1 question ("yes or no")                                                                                                                                                                | Pre OU 78% (18/23)<br>Post OU 92% (36/39)                                                                                                                                                                                                                                                                   | parents, which conducted this project.                                                                                                                                                                                                                                                                                                                                                                                                                                                                    |    |   |
| 1<br>2<br>3<br>4<br>5<br>6<br>7<br>8<br>9<br>10<br>11<br>12<br>13<br>14<br>15<br>16<br>17<br>18<br>19<br>20<br>21<br>22<br>23<br>24<br>25<br>26 | 8. Segre et al. (2013), USA | Mothers /23                                                                  | Mean (SD) 31.57 (5.30) / level III | For the outcome of parent satisfaction:<br><br>Non-Randomised, Convenience sampling.<br><br><i>Group level effect:</i> Intervention/control groups<br><br>Post-intervention group testing only | <b>Intervention: (LV) Listening visits.</b><br><br>Mothers met with the LV provider for up to six 50-min LV sessions, conducted in a private hospital, every 2-3 days, within 1-month. Visits entailed greeting, debriefing, updating on current issues, working an agenda through listening and problem solving, and providing closure through summary.<br><br><b>Control:</b> Women who did not meet the specific criteria (e.g. minimum score on depression scale) were not invited to join the treatment trial and received routine NICU care/support instead. | <b>Satisfaction with the treatment and the outcome.</b> | During babies' admission (once)<br><br>- Not stated exactly when<br><br>No pre-intervention parent satisfaction data available for comparison.                                                     | <i>Satisfaction questionnaire</i><br><br>The <i>Client Satisfaction Questionnaire</i> was used.<br><br><b>Validation:</b> Partially reported. Authors stated reliability testing took place; no information on content validity provided.<br><br>8 questions.<br><br><b>Format of questions:</b> not stated | <b>Only the intervention group was assessed and only post-intervention.</b><br><br>The authors reported:<br><br>"The majority of women who received LVs were highly satisfied with the intervention."<br><br>"The average score for the Client Satisfaction Questionnaire was 29.91, comparable to levels of satisfaction reported by clients receiving depression treatment from a mental health professional."<br><br>"91.3% of our participants rated the quality of help they received as excellent." | No | 4 |
| 27<br>28<br>29<br>30<br>31<br>32<br>33<br>34<br>35<br>36<br>37<br>38<br>39<br>40<br>41<br>42<br>43                                              | 9. Palma et al. (2012), USA | Not stated / 26 families returned the survey containing the satisf. measure) | Not stated / level II              | Non-randomised, Convenience sampling.<br><br><i>Unit level effect:</i> Two different time periods                                                                                              | <b>Intervention: YBDU (Your Baby's Daily Update). A daily parent update letter generated from the Electronic Medical Record (EMR).</b><br><br>Parents were given daily YBDU reports, printed automatically from the EMR. The YBDU included information about an infant's status during the past 24 hours and a hand-written update by the infant's care provider.<br><br><b>Control:</b> Parents received routine care and usual verbal updates (6 months pre- adoption of YBDU).                                                                                  | <b>Satisfaction with YBDU</b>                           | During babies' admission (once)<br><br>- Not stated exactly when<br><br>No pre-intervention parent satisfaction data available for comparison (different parent groups pre and post intervention). | <i>Satisfaction questionnaire</i><br><br>A questionnaire including items regarding adoption of and satisfaction with YBDU was used.<br><br><b>Validation:</b> No content validity or reliability testing reported.<br><br><b>Number and format of questions:</b> not stated.                                | <b>Only the intervention group was assessed and only post-intervention.</b><br><br>The authors reported:<br><br>"When asked to rate the statement "I like receiving Your Baby's Daily Update", 96% of families who used YBDU as an information source responded with the highest rating, "always"."                                                                                                                                                                                                       | No | 4 |
| 44<br>45<br>46                                                                                                                                  | 10. Voos et al.             | Not stated /28                                                               | Not stated / level not             | Non-randomised,                                                                                                                                                                                | <b>Intervention: Family-centered rounds</b>                                                                                                                                                                                                                                                                                                                                                                                                                                                                                                                        | <b>Satisfaction with</b>                                | During babies' admission (twice)                                                                                                                                                                   | <i>Satisfaction questionnaire (Validated)</i>                                                                                                                                                                                                                                                               | <b>A subset of NIPS items related to communication</b>                                                                                                                                                                                                                                                                                                                                                                                                                                                    | No | 1 |



|                                     |                                                         |                                                                                                 |                                                                                                                 |                                                                                                                                                                                                                                                                                                                                                                                                                                                                                              |                                                                                |                                                                                                                                                              |                                                                                                                                                                                                                                                                                                                                                           |                                                                                                                                                                                                                                                                                                                                                                                                                                                                                |                                                                                                                                                            |          |
|-------------------------------------|---------------------------------------------------------|-------------------------------------------------------------------------------------------------|-----------------------------------------------------------------------------------------------------------------|----------------------------------------------------------------------------------------------------------------------------------------------------------------------------------------------------------------------------------------------------------------------------------------------------------------------------------------------------------------------------------------------------------------------------------------------------------------------------------------------|--------------------------------------------------------------------------------|--------------------------------------------------------------------------------------------------------------------------------------------------------------|-----------------------------------------------------------------------------------------------------------------------------------------------------------------------------------------------------------------------------------------------------------------------------------------------------------------------------------------------------------|--------------------------------------------------------------------------------------------------------------------------------------------------------------------------------------------------------------------------------------------------------------------------------------------------------------------------------------------------------------------------------------------------------------------------------------------------------------------------------|------------------------------------------------------------------------------------------------------------------------------------------------------------|----------|
| (2011), USA                         |                                                         | stated                                                                                          | Convenience sampling.<br><br><i>Unit level effect:</i><br>Two different time periods                            | <b>(FCRs).</b><br><br>Parents were invited to attend rounds and choose their level of involvement (attend every day/not at all/periodically). For confidentiality concerns, parents were asked to step outside while rounds of others' infants took place. The staff augmented FCRs by meeting with parents again after rounds if needed.<br><br><b>Control:</b> Parents received routine care. Prior to FCR implementation parents were asked to leave the unit during rounds.              | <i>the NICU experience</i>                                                     | - Prior to FCR<br><br>- 6 months after starting FCR                                                                                                          | <i>The NIPS</i> questionnaire.<br><br>24 questions: looking at satisfaction in different areas of the NICU (medical caregivers, communication, tests, and procedures).<br><br>Likert scale (1-7 points).                                                                                                                                                  | <b>(i.e. being kept informed as to changes in the infant's condition, meeting with physicians, and information about long-term expectations) yielded a significant increase from pre to post FCR scores.</b><br><br><b>post-FCR pre-FCR p-value</b><br>NIPS 5.5 4.4 <0.01<br><b>score</b><br><br>The average score on the NIPS did not change significantly.                                                                                                                   |                                                                                                                                                            |          |
| 11. Weiss et al. (2010), USA        | Mothers /84                                             | Mean (SD)<br><br>Pre-interv group: 32 (4.4)<br><br>Post-interv group: 32 (9)<br><br>/ level III | Non-randomised, Convenience sampling<br><br><i>Unit level effect:</i><br>Two different time periods             | <b>Intervention:</b><br><b>An intervention to increase PMP (Principal Medical Providers) availability and communication frequency.</b><br><br>(1) A brief education module for PMPs was introduced (2) parents received a contact card with PMP names, job descriptions and contact information (3) a poster of the faces, names and titles of the PMPs was placed at NICU entrance.<br><br><b>Control:</b> Parents received routine care in the pre-intervention cohort, without the above. | <b>Parent satisfaction with physician and nurse practitioner communication</b> | During babies' admission (twice)<br><br>- Pre-intervention<br><br>- Post-intervention                                                                        | <i>Satisfaction Questionnaire (Validated)</i><br><br>A pilot survey written by Press Ganey and the Picker Institute was used and revised based on parent responses.<br><br>6 open-ended questions (Quantity of communication)<br><br>6 Likert scale questions (range questions (Availability, understanding, reciprocity, empathy, overall satisfaction)) | <b>Overall satisfaction, based on the ordinal analysis of the five-point Likert scale, was significantly higher after the intervention (P&lt;0.01).</b><br><br><b>Overall satisfaction, dichotomised into a satisfied subgroup and a dissatisfied subgroup for each cohort, was also significantly increased after the intervention.</b><br><br><b>post -interv pre-interv</b><br><b>Very satisfied/ Somewhat satisfied</b><br>97%(32/33)74%(37/50)<br><b>p-value &lt;0.01</b> | <b>No</b><br><br>Authors stated that only after trialing the intervention on many parents (both satisfied and unsatisfied) gave suggestions to improve it. | <b>1</b> |
| 12. Foster et al. (2008), Australia | Mothers and fathers /93<br><br>5 Special Care Nurseries | Mean (SD)<br><br>Headbox: 36.5 (2.6)<br><br>CPAP: 36 (3)<br><br>/level I                        | Non-randomised, Convenience sampling<br><br><i>Group level effect:</i><br>Intervention 1/ intervention 2 groups | <b>Intervention 1: Infants received headbox oxygen treatment for respiratory distress.</b><br><br><b>Intervention 2: Infants received continuous oxygen positive airway pressure (CPAP) treatment for respiratory distress.</b>                                                                                                                                                                                                                                                              | <b>Satisfaction with treatment (i.e. headbox oxygen or CPAP)</b>               | During babies' admission (once)<br><br>- Within 5 days of the babies' admission<br><br>No pre-intervention parent satisfaction data available for comparison | <i>Single question</i><br><br><b>Validation:</b> No content validity or reliability testing reported.<br><br>1 likert scale question (1 not at all satisfied-5 extremely satisfied).                                                                                                                                                                      | <b>Parents with babies receiving CPAP rated their satisfaction with the baby's treatment statistically significantly higher than the headbox group mean rating.</b><br><br><b>Headbox CPAP</b><br><b>Mean (SD)</b><br>3.71 (1.31) 4.51 (0.79)<br><b>p-value 0.001</b>                                                                                                                                                                                                          | <b>No</b>                                                                                                                                                  | <b>1</b> |

|                              |                                                                   |                                                                                                       | Post intervention testing only                                                                                                                                                           |                                                                                                                                                                                                                                                                                                                                                                                                                                                                                                                                                                                                                                                                                            |                                                                                                                                                                                                                                                                                                          |                                                                                                                                                    |                                                                                                                                                                                                                                                                                                                                                  | The CPAP group averaged between <i>very and extremely satisfied</i> compared with parents of babies receiving headbox, who averaged between <i>satisfied and very satisfied</i> ratings.                                                                                                                                                                                                                                                                                                                                                                                                                                                                                                                                                                                                  |    |        |         |           |            |            |         |       |  |    |   |
|------------------------------|-------------------------------------------------------------------|-------------------------------------------------------------------------------------------------------|------------------------------------------------------------------------------------------------------------------------------------------------------------------------------------------|--------------------------------------------------------------------------------------------------------------------------------------------------------------------------------------------------------------------------------------------------------------------------------------------------------------------------------------------------------------------------------------------------------------------------------------------------------------------------------------------------------------------------------------------------------------------------------------------------------------------------------------------------------------------------------------------|----------------------------------------------------------------------------------------------------------------------------------------------------------------------------------------------------------------------------------------------------------------------------------------------------------|----------------------------------------------------------------------------------------------------------------------------------------------------|--------------------------------------------------------------------------------------------------------------------------------------------------------------------------------------------------------------------------------------------------------------------------------------------------------------------------------------------------|-------------------------------------------------------------------------------------------------------------------------------------------------------------------------------------------------------------------------------------------------------------------------------------------------------------------------------------------------------------------------------------------------------------------------------------------------------------------------------------------------------------------------------------------------------------------------------------------------------------------------------------------------------------------------------------------------------------------------------------------------------------------------------------------|----|--------|---------|-----------|------------|------------|---------|-------|--|----|---|
| 13. Byers et al. (2006), USA | Only mothers reported /35                                         | Preterm infants<br>Mean (SD)<br><br>Control: 28.9 (3.44)<br>Interv: 28.6 (3.37)<br><br>/ level II/III | For the outcome of parent satisfaction:<br><br>Non-randomised, Convenience sampling<br><br><i>Group level effect:</i> Intervention/ control groups<br><br>Post-intervention testing only | <b>Intervention: Infants received individualised, developmentally supportive family-centered care.</b><br><br>Infants received care within the framework and philosophy of individualised, developmentally supportive family-centered interventions.<br><br><b>Control:</b> Infants received the traditional NICU standard of care.                                                                                                                                                                                                                                                                                                                                                        | <b>Parent satisfaction relating to:</b><br>- parental perceptions of staff caring<br>- education received<br>- preparation for the parental role<br>- overall satisfaction with the NICU experience                                                                                                      | During babies' admission (once)<br><br>- On the day before discharge<br><br>No pre-intervention parent satisfaction data available for comparison. | <i>Satisfaction questionnaire</i><br><br>The NICU's parental satisfaction tool was used.<br><br><b>Validation:</b> Partially reported. Authors stated content validity testing took place, but "because of the disparate nature of the items, survey reliability was not assessed".<br><br>11 questions<br><br>Likert scale (1-5 strongly agree) | <b>Independent t-test analysis of parent satisfaction/perception scores showed no significant difference between groups.</b><br><br>Example statement: "I was satisfied with the car my baby and I received in the NICU"<br><br><table border="1"> <thead> <tr> <th></th> <th>Interv</th> <th>Control</th> </tr> </thead> <tbody> <tr> <td>Mean (SD)</td> <td>4.94(0.23)</td> <td>4.71(0.47)</td> </tr> <tr> <td>p-value</td> <td colspan="2">0.064</td> </tr> </tbody> </table><br><br>Both groups reported very high satisfaction with their NICU experience (4.4-5.0)                                                                                                                                                                                                                  |    | Interv | Control | Mean (SD) | 4.94(0.23) | 4.71(0.47) | p-value | 0.064 |  | No | 2 |
|                              | Interv                                                            | Control                                                                                               |                                                                                                                                                                                          |                                                                                                                                                                                                                                                                                                                                                                                                                                                                                                                                                                                                                                                                                            |                                                                                                                                                                                                                                                                                                          |                                                                                                                                                    |                                                                                                                                                                                                                                                                                                                                                  |                                                                                                                                                                                                                                                                                                                                                                                                                                                                                                                                                                                                                                                                                                                                                                                           |    |        |         |           |            |            |         |       |  |    |   |
| Mean (SD)                    | 4.94(0.23)                                                        | 4.71(0.47)                                                                                            |                                                                                                                                                                                          |                                                                                                                                                                                                                                                                                                                                                                                                                                                                                                                                                                                                                                                                                            |                                                                                                                                                                                                                                                                                                          |                                                                                                                                                    |                                                                                                                                                                                                                                                                                                                                                  |                                                                                                                                                                                                                                                                                                                                                                                                                                                                                                                                                                                                                                                                                                                                                                                           |    |        |         |           |            |            |         |       |  |    |   |
| p-value                      | 0.064                                                             |                                                                                                       |                                                                                                                                                                                          |                                                                                                                                                                                                                                                                                                                                                                                                                                                                                                                                                                                                                                                                                            |                                                                                                                                                                                                                                                                                                          |                                                                                                                                                    |                                                                                                                                                                                                                                                                                                                                                  |                                                                                                                                                                                                                                                                                                                                                                                                                                                                                                                                                                                                                                                                                                                                                                                           |    |        |         |           |            |            |         |       |  |    |   |
| 14. Mills et al. (2006), USA | Not stated/ not stated<br><br>Parents of infants from 6 hospitals | Not stated / level not stated                                                                         | Implementation project<br><br>Plan Do Study Act (PDSA) quality improvement testing                                                                                                       | <b>Intervention: 5 potentially better practices (PBPs) in the area of discharge planning.</b><br><br>The project team iteratively implemented 5 PBPs:<br>1. Created an easy-to-use, easy-to-access discharge planning tool kit.<br>2. Restructured communication tools and processes to reflect a "plan for the day, the stay, and the way" to discharge.<br>3. Maximised the impact and use of caregiver educational tools, and updated materials and delivery systems for caregiver education.<br>4. Used various continuous quality improvement tools and processes to ensure parent/caregiver and staff satisfaction.<br>5. Analysed and enhanced interactions with and transfers into | <b>General satisfaction</b><br>- with care<br>- parents' feelings about preparedness for discharge<br>- ability and confidence in feeding<br>- familiarity with their infant<br>- feeling like a parent<br>- participation in care<br>- adequacy of information from staff about medical and care issues | During babies' admission (4 times)<br><br>- Not reported exactly when                                                                              | <i>Satisfaction questionnaire</i><br><br>The Internet-based parent satisfaction survey "howsyourbaby.com" that was developed especially for this NICU population was used.<br><br><b>Validation:</b> No content validity or reliability testing reported.<br><br><b>Number and format of questions:</b> not stated.                              | Through multiple rapid-cycle projects, the project's collaborative group made changes within the 5 PBP plans.<br><br><b>Parent satisfaction measures were used to longitudinally monitor the changes made, rather than make direct group comparison. No data indicating statistical analysis conducted or evidence of statistically significant results.</b><br><br>Parent satisfaction survey results (all centers combined) were high across 4 measurement quartiles. No specific interquartile analysis was reported.<br><br>Parent readiness for discharge was high at the beginning and throughout the collaborative. Parents' receiving "just the right amount of information" regarding car seat trials and safe sleep demonstrated some variability throughout the collaborative. | No | 3      |         |           |            |            |         |       |  |    |   |

|                                             |                                                                                                                 |                                                                                               |                                                                                                                                                                                                                                                           | the community.<br><br><u>Control:</u> N/A. No discrete control group. PDSA quality improvement methodology was applied to parent participants.                                                                                                                                                                                                                                                                                                                                                                                                                                   |                                                                                                                                                                                                                                                                   |                                                                                                                                              |                                                                                                                                                                                                                                                                                                                                                                                                                                                                            |                                                                                                                                                                                                                                                                                                                                                                                                                                                                                                                                                                                                                                                                                                                                                                                                                                                                                                  |  |        |         |           |                           |               |       |        |                                |        |        |       |         |       |  |    |   |
|---------------------------------------------|-----------------------------------------------------------------------------------------------------------------|-----------------------------------------------------------------------------------------------|-----------------------------------------------------------------------------------------------------------------------------------------------------------------------------------------------------------------------------------------------------------|----------------------------------------------------------------------------------------------------------------------------------------------------------------------------------------------------------------------------------------------------------------------------------------------------------------------------------------------------------------------------------------------------------------------------------------------------------------------------------------------------------------------------------------------------------------------------------|-------------------------------------------------------------------------------------------------------------------------------------------------------------------------------------------------------------------------------------------------------------------|----------------------------------------------------------------------------------------------------------------------------------------------|----------------------------------------------------------------------------------------------------------------------------------------------------------------------------------------------------------------------------------------------------------------------------------------------------------------------------------------------------------------------------------------------------------------------------------------------------------------------------|--------------------------------------------------------------------------------------------------------------------------------------------------------------------------------------------------------------------------------------------------------------------------------------------------------------------------------------------------------------------------------------------------------------------------------------------------------------------------------------------------------------------------------------------------------------------------------------------------------------------------------------------------------------------------------------------------------------------------------------------------------------------------------------------------------------------------------------------------------------------------------------------------|--|--------|---------|-----------|---------------------------|---------------|-------|--------|--------------------------------|--------|--------|-------|---------|-------|--|----|---|
| 15. Wielenga et al. (2006), The Netherlands | Mothers and fathers / 46                                                                                        | Mean (SD)<br><br>Control: 28.5 (26.0-29.9)<br><br>Interv: 28.3 (25.6-29.9)<br><br>/ level III | Non-randomised, Convenience sampling<br><br><i>Unit level effect:</i><br>Two different time periods                                                                                                                                                       | <u>Intervention:</u> <b>The Newborn Individualised Developmental Care and Assessment Program (NIDCAP).</b><br><br>Infants received care according to NIDCAP principles and parents were taught how to provide it. Caregiving plans were designed based on the infant's current developmental stage, medical condition and family needs. Caregivers learnt to watch sensitively and note the infant's reactions to different types of handling and care, making continuous adjustments.<br><br><u>Control:</u> Infants received traditional neonatal care practiced at that time. | <b>Parent satisfaction relating to:</b><br>-Overall rating<br>-Care of the baby<br>-Communication with staff<br>-Involvement in care<br>-Being prepared<br>-Being a parent<br>-Being near your baby<br>-Total score                                               | After babies were discharged (on day of discharge/ transfer)<br><br>- Pre NIDCAP cohort<br><br>- Post NIDCAP cohort                          | <i>Satisfaction questionnaire (Validated)</i><br><br>The NICU-PSF was used and translated from English to Dutch.<br><br>62 questions<br><br>Closed and open-ended questions.<br><br>Different rating scales used (5-point rating scale from "extremely satisfied" to "not at all satisfied" or "excellent" to "poor").<br><br>Total score range (50-243 points)                                                                                                            | <b>The intervention group's mean total score was significantly higher than the control.</b><br><br><table border="1"> <thead> <tr> <th></th> <th>Interv</th> <th>Control</th> </tr> </thead> <tbody> <tr> <td>Mean (SD)</td> <td>185.67(17.74)</td> <td>174.04(20.98)</td> </tr> </tbody> </table><br><b>p-value</b> 0.041<br><br>Almost all separate concepts showed an increase in their mean scores. The concept of "being a parent" had a slightly lower mean score (9.39, SD = 1.73) in the intervention group than in the control group (9.78, SD = 2.09).<br><br><b>The concept of "preparedness" showed statistically significant difference:</b><br><br><table border="1"> <thead> <tr> <th></th> <th>Interv</th> <th>Control</th> </tr> </thead> <tbody> <tr> <td>Mean</td> <td>16.38</td> <td>13.83</td> </tr> <tr> <td>p-value</td> <td>0.038</td> <td></td> </tr> </tbody> </table> |  | Interv | Control | Mean (SD) | 185.67(17.74)             | 174.04(20.98) |       | Interv | Control                        | Mean   | 16.38  | 13.83 | p-value | 0.038 |  | No | 1 |
|                                             | Interv                                                                                                          | Control                                                                                       |                                                                                                                                                                                                                                                           |                                                                                                                                                                                                                                                                                                                                                                                                                                                                                                                                                                                  |                                                                                                                                                                                                                                                                   |                                                                                                                                              |                                                                                                                                                                                                                                                                                                                                                                                                                                                                            |                                                                                                                                                                                                                                                                                                                                                                                                                                                                                                                                                                                                                                                                                                                                                                                                                                                                                                  |  |        |         |           |                           |               |       |        |                                |        |        |       |         |       |  |    |   |
| Mean (SD)                                   | 185.67(17.74)                                                                                                   | 174.04(20.98)                                                                                 |                                                                                                                                                                                                                                                           |                                                                                                                                                                                                                                                                                                                                                                                                                                                                                                                                                                                  |                                                                                                                                                                                                                                                                   |                                                                                                                                              |                                                                                                                                                                                                                                                                                                                                                                                                                                                                            |                                                                                                                                                                                                                                                                                                                                                                                                                                                                                                                                                                                                                                                                                                                                                                                                                                                                                                  |  |        |         |           |                           |               |       |        |                                |        |        |       |         |       |  |    |   |
|                                             | Interv                                                                                                          | Control                                                                                       |                                                                                                                                                                                                                                                           |                                                                                                                                                                                                                                                                                                                                                                                                                                                                                                                                                                                  |                                                                                                                                                                                                                                                                   |                                                                                                                                              |                                                                                                                                                                                                                                                                                                                                                                                                                                                                            |                                                                                                                                                                                                                                                                                                                                                                                                                                                                                                                                                                                                                                                                                                                                                                                                                                                                                                  |  |        |         |           |                           |               |       |        |                                |        |        |       |         |       |  |    |   |
| Mean                                        | 16.38                                                                                                           | 13.83                                                                                         |                                                                                                                                                                                                                                                           |                                                                                                                                                                                                                                                                                                                                                                                                                                                                                                                                                                                  |                                                                                                                                                                                                                                                                   |                                                                                                                                              |                                                                                                                                                                                                                                                                                                                                                                                                                                                                            |                                                                                                                                                                                                                                                                                                                                                                                                                                                                                                                                                                                                                                                                                                                                                                                                                                                                                                  |  |        |         |           |                           |               |       |        |                                |        |        |       |         |       |  |    |   |
| p-value                                     | 0.038                                                                                                           |                                                                                               |                                                                                                                                                                                                                                                           |                                                                                                                                                                                                                                                                                                                                                                                                                                                                                                                                                                                  |                                                                                                                                                                                                                                                                   |                                                                                                                                              |                                                                                                                                                                                                                                                                                                                                                                                                                                                                            |                                                                                                                                                                                                                                                                                                                                                                                                                                                                                                                                                                                                                                                                                                                                                                                                                                                                                                  |  |        |         |           |                           |               |       |        |                                |        |        |       |         |       |  |    |   |
| 16. Penticuff and Arheart. (2005), USA      | Dyads (both parents or mother with her support person)/ 122 mothers<br><br>Results based only on mothers' data. | Not stated / Level III                                                                        | A repeated measures design<br><br>- First 2 years (control group data collection)<br><br>- Year 3 (staff training)<br><br>- Year 4 (implementing the intervention)<br><br>- Year 5 (collecting data from the intervention group)<br><br><i>Unit level</i> | <u>Intervention:</u> <b>The Newborn Individualised IPC- CPM intervention (Infant Progress Chart) - (Care Planning Meetings).</b><br><br>Both the mother and father (or the mother and her designated support person) were shown how to use the Infant Progress Chart and attended 3 Care Planning Meetings (with neonatologists/Neonatal Nurse Practitioners).<br><br><u>Control:</u> During the control phase, professionals carried out usual communication and interaction with control                                                                                       | <b>Satisfaction with participation in decision making was measured by 5 collaboration indices:</b><br><br>Satisfaction with<br>(1) Care<br>(2) Relationships with professionals<br>(3) Decision input<br>(4) The process of decision making<br>(5) Decisions made | During babies' admission (three times)<br><br>- Within 0-3 days<br><br>- 9- 12 days<br><br>- 25-28 days of an infant's admission to the NICU | <i>Three satisfaction questionnaires</i><br><br>1. Two subscales of the investigator-designed "Parents' Understanding of Infant Care and Outcomes Questionnaire" were used to measure Satisfaction with Care (1).<br><br><u>Validation:</u> Partially reported. Authors stated content validity testing took place; no information on reliability testing provided.<br><br>30 questions.<br><br>Five-point Likert scale.<br><br>2. A subscale of the investigator-designed | <b>The intervention group was more satisfied with the amount of decision input they had (3) and with the process by which medical decisions were made (4).</b><br><br><table border="1"> <thead> <tr> <th></th> <th>Interv</th> <th>Control</th> <th>p-value</th> </tr> </thead> <tbody> <tr> <td>Decision input amount (3)</td> <td>33.44</td> <td>30.05</td> <td>0.058</td> </tr> <tr> <td>Process of decision making (4)</td> <td>120.20</td> <td>104.95</td> <td>0.012</td> </tr> </tbody> </table><br>There were no statistically significant differences between control and intervention groups in satisfaction with their infants' care (1), with relationships with NICU professionals (2) and with the decisions made for infant treatment (5).                                                                                                                                        |  | Interv | Control | p-value   | Decision input amount (3) | 33.44         | 30.05 | 0.058  | Process of decision making (4) | 120.20 | 104.95 | 0.012 | No      | 1     |  |    |   |
|                                             | Interv                                                                                                          | Control                                                                                       | p-value                                                                                                                                                                                                                                                   |                                                                                                                                                                                                                                                                                                                                                                                                                                                                                                                                                                                  |                                                                                                                                                                                                                                                                   |                                                                                                                                              |                                                                                                                                                                                                                                                                                                                                                                                                                                                                            |                                                                                                                                                                                                                                                                                                                                                                                                                                                                                                                                                                                                                                                                                                                                                                                                                                                                                                  |  |        |         |           |                           |               |       |        |                                |        |        |       |         |       |  |    |   |
| Decision input amount (3)                   | 33.44                                                                                                           | 30.05                                                                                         | 0.058                                                                                                                                                                                                                                                     |                                                                                                                                                                                                                                                                                                                                                                                                                                                                                                                                                                                  |                                                                                                                                                                                                                                                                   |                                                                                                                                              |                                                                                                                                                                                                                                                                                                                                                                                                                                                                            |                                                                                                                                                                                                                                                                                                                                                                                                                                                                                                                                                                                                                                                                                                                                                                                                                                                                                                  |  |        |         |           |                           |               |       |        |                                |        |        |       |         |       |  |    |   |
| Process of decision making (4)              | 120.20                                                                                                          | 104.95                                                                                        | 0.012                                                                                                                                                                                                                                                     |                                                                                                                                                                                                                                                                                                                                                                                                                                                                                                                                                                                  |                                                                                                                                                                                                                                                                   |                                                                                                                                              |                                                                                                                                                                                                                                                                                                                                                                                                                                                                            |                                                                                                                                                                                                                                                                                                                                                                                                                                                                                                                                                                                                                                                                                                                                                                                                                                                                                                  |  |        |         |           |                           |               |       |        |                                |        |        |       |         |       |  |    |   |

|    |                              |             |                                                                                      |                                                                                                                                                                                             |                                                                                                                                                                                                                                                                                                                                                               |                                                                                                                                                                                                                                                                                                                         |                                                                                                                                                                                                                                                                                                                                                                                                                                                                                                                                                                                                                                                    |                                                                                                                                                                                                                                                                                                                                                               |                                                                                                                                                                                                                                                                                                                                                                                                                                                                                                        |    |   |
|----|------------------------------|-------------|--------------------------------------------------------------------------------------|---------------------------------------------------------------------------------------------------------------------------------------------------------------------------------------------|---------------------------------------------------------------------------------------------------------------------------------------------------------------------------------------------------------------------------------------------------------------------------------------------------------------------------------------------------------------|-------------------------------------------------------------------------------------------------------------------------------------------------------------------------------------------------------------------------------------------------------------------------------------------------------------------------|----------------------------------------------------------------------------------------------------------------------------------------------------------------------------------------------------------------------------------------------------------------------------------------------------------------------------------------------------------------------------------------------------------------------------------------------------------------------------------------------------------------------------------------------------------------------------------------------------------------------------------------------------|---------------------------------------------------------------------------------------------------------------------------------------------------------------------------------------------------------------------------------------------------------------------------------------------------------------------------------------------------------------|--------------------------------------------------------------------------------------------------------------------------------------------------------------------------------------------------------------------------------------------------------------------------------------------------------------------------------------------------------------------------------------------------------------------------------------------------------------------------------------------------------|----|---|
| 1  |                              |             | effect: Two different time periods                                                   | group parents.                                                                                                                                                                              |                                                                                                                                                                                                                                                                                                                                                               |                                                                                                                                                                                                                                                                                                                         | <p>"Relationships with Professional and Decision Input Questionnaire" was used to measure Satisfaction with relationships (2).</p> <p><u>Validation:</u> Partially reported. Authors stated content validity testing took place; no information on reliability testing provided. 12 questions.</p> <p>Five-point Likert scale</p> <p><u>3. Validated.</u> The "Collaboration and Satisfaction About Care Questionnaire" developed by Baggs, was used to measure Satisfaction with decision input (3), with decision process (4) and with decisions made (5).</p> <p>9 questions.</p> <p>7-point scale, (1 strongly disagree -7 strongly agree)</p> |                                                                                                                                                                                                                                                                                                                                                               |                                                                                                                                                                                                                                                                                                                                                                                                                                                                                                        |    |   |
| 23 | 17. Byers et al. (2003), USA | Mothers/ 19 | Mean (SD)<br><br>Control: 29 (2.00)<br><br>Interv: 28.9 (2.42)<br><br>/ level II-III | For the outcome of parent satisfaction:<br><br>Non-randomised, Convenience sampling<br><br><i>Group level effect:</i> Intervention/ control groups<br><br>Pre and post-intervention testing | <u>Intervention: Co-bedding premature multiple-gestation infants in incubators.</u><br><br>Infants were nursed in the same incubator using a co-bedding protocol (e.g. recording all of the care provided to one infant before providing care to the second infant)<br><br><u>Control:</u> Single-bedding premature multiple-gestation infants in incubators. | <u>Parent satisfaction related to:</u><br>- staff concern<br>- support of family<br>- staff explanations<br>- infant environment,<br>- comfort with feeding<br>- kangaroo care encouragement<br>- staff explanation of signs of infant stress<br>- visiting schedule<br>- overall satisfaction with the NICU experience | During babies' admission (twice)<br><br>- At baseline<br><br>- 5 days later                                                                                                                                                                                                                                                                                                                                                                                                                                                                                                                                                                        | <p><i>Satisfaction questionnaire</i></p> <p>The NICU's standard parental satisfaction tool was used.</p> <p><u>Validation:</u> Partially reported. Authors stated content validity testing took place, but because of the disparate nature of the items, survey reliability could not be assessed.</p> <p>11 questions.</p> <p>5-point Likert-type scale.</p> | <p><b>The only significant difference for a post-intervention item was a higher score for the item "Attempts were made to create a quiet environment for my baby."</b></p> <p><b>Interv Control p-value</b><br/><b>Mean 4.80 3.89 0.033</b></p> <p>Independent t-tests comparing the co-bedded and control group parental scores found no significant differences in their parental satisfaction scores, except for higher baseline parental satisfaction scores (p=0.029) in the co-bedded group.</p> | No | 1 |

| 1<br>2<br>3<br>4<br>5<br>6<br>7<br>8<br>9<br>10<br>11<br>12<br>13<br>14<br>15<br>16                                        | 18. Polizzi et al. (2003), USA         | Mothers and fathers/ 33          | Mean (SD)<br>Control: 32.97 (1.9)<br><br>Interv: 33.08 (1.31)<br><br>/ level III | A retrospective, comparative, descriptive design.<br><br><i>Unit level effect</i>                                      | <b>Intervention: Co-bedding multiple-gestation infants in the NICU.</b><br><br>Multiple-gestation infants were nursed in the same incubator or crib. The intervention was evaluated retrospectively after implementation of a co-bedding practice protocol.<br><br><b>Control:</b> Traditionally-bedded group (babies were routinely placed in separate incubators or cribs)                                                                                                                                                                                                    | <b>Parental satisfaction as measured by 9 questions relating to parent perceptions and their baby's care</b>                               | After babies were discharged (once)<br><br>- All parents were mailed the survey. A second survey was sent to those who did not respond after 2 months<br><br>No pre-intervention parent satisfaction data available for comparison. | <i>Satisfaction questionnaire</i><br><br>The <i>parental perception/satisfaction tool</i> was used.<br><br><b>Validation:</b> Partially reported. Authors stated content validity testing took place; no information on reliability testing provided. 6/9 questions were from a similar tool that was validated by the Vermont Oxford NICU Quality Improvement Initiative.<br><br>9 questions (such as "I was satisfied with the care my babies received in the hospital").<br><br>Likert (1 strongly disagree- 5 strongly agree)                 | Mothers reported overall satisfaction with the NICU care and staff, as well as adequacy of their ability to care for their infants after discharge, with scores ranging from 4.19 to 4.71.<br><br><b>The only survey item score that was significantly different between groups was for the item "I was encouraged by the hospital staff to bond with my babies."</b><br><br><table border="1"> <thead> <tr> <th></th> <th>Interv</th> <th>Control</th> <th>p-value</th> </tr> </thead> <tbody> <tr> <td>Mean</td> <td>4.71</td> <td>4.36</td> <td>0.049</td> </tr> </tbody> </table> |    | Interv | Control | p-value | Mean | 4.71 | 4.36 | 0.049 | No | 1 |
|----------------------------------------------------------------------------------------------------------------------------|----------------------------------------|----------------------------------|----------------------------------------------------------------------------------|------------------------------------------------------------------------------------------------------------------------|---------------------------------------------------------------------------------------------------------------------------------------------------------------------------------------------------------------------------------------------------------------------------------------------------------------------------------------------------------------------------------------------------------------------------------------------------------------------------------------------------------------------------------------------------------------------------------|--------------------------------------------------------------------------------------------------------------------------------------------|-------------------------------------------------------------------------------------------------------------------------------------------------------------------------------------------------------------------------------------|---------------------------------------------------------------------------------------------------------------------------------------------------------------------------------------------------------------------------------------------------------------------------------------------------------------------------------------------------------------------------------------------------------------------------------------------------------------------------------------------------------------------------------------------------|---------------------------------------------------------------------------------------------------------------------------------------------------------------------------------------------------------------------------------------------------------------------------------------------------------------------------------------------------------------------------------------------------------------------------------------------------------------------------------------------------------------------------------------------------------------------------------------|----|--------|---------|---------|------|------|------|-------|----|---|
|                                                                                                                            | Interv                                 | Control                          | p-value                                                                          |                                                                                                                        |                                                                                                                                                                                                                                                                                                                                                                                                                                                                                                                                                                                 |                                                                                                                                            |                                                                                                                                                                                                                                     |                                                                                                                                                                                                                                                                                                                                                                                                                                                                                                                                                   |                                                                                                                                                                                                                                                                                                                                                                                                                                                                                                                                                                                       |    |        |         |         |      |      |      |       |    |   |
| Mean                                                                                                                       | 4.71                                   | 4.36                             | 0.049                                                                            |                                                                                                                        |                                                                                                                                                                                                                                                                                                                                                                                                                                                                                                                                                                                 |                                                                                                                                            |                                                                                                                                                                                                                                     |                                                                                                                                                                                                                                                                                                                                                                                                                                                                                                                                                   |                                                                                                                                                                                                                                                                                                                                                                                                                                                                                                                                                                                       |    |        |         |         |      |      |      |       |    |   |
| 17<br>18<br>19<br>20<br>21<br>22<br>23<br>24<br>25<br>26<br>27<br>28<br>29<br>30<br>31<br>32<br>33<br>34<br>35<br>36<br>37 | 19. Legault and Goulet. (1995), Canada | Mothers/ 61 completed both tests | Mean (range)<br>30 (24-35)<br><br>/ level II                                     | Time-series design<br><br><i>Group level effect:</i> Same group exposed to both methods with post-method testing only. | <b>Intervention: Kangaroo method of removing an infant from an incubator.</b><br><br>Mothers were taught the "kangaroo method" (skin-to-skin contact): infant wears a diaper/head cap and is placed in a vertical position on the parent's bared chest. A blanket covers the infant and the parent's clothing is fastened around the infant. The parent sits in a rocking chair, inclined so that the infant's head is at 60'.<br><br><b>Control:</b> Traditional method. Newborns wearing a diaper and a head cap, are wrapped in a blanket and placed in their parent's arms. | <b>Mothers' satisfaction with:</b><br>- <i>Each method of removing an infant from incubator</i><br>- <i>Her feelings after each method</i> | During babies' admission (twice)<br><br>- After the intervention<br><br>- After the control method<br><br>No pre-intervention parent satisfaction data available for comparison.                                                    | <i>Satisfaction questionnaire</i><br><br>The "Maternal Satisfaction Questionnaire" was used. It was developed by integrating components described by Affonso et al and the clinical experience of the investigators.<br><br><b>Validation:</b> Partially reported. Authors stated content validity testing took place; no information on reliability testing provided.<br><br>15 questions<br><br>Likert (1 very much-5 don't know)<br><br>An open-ended question invited the mother to list and explain anything else related to her experience. | <b>Regardless of the method tested, mothers expressed high levels of satisfaction (it was the first time since giving birth that they could hold their infants).</b><br><br>Three statements proved more powerful in discriminating between the methods:<br><br><b>Rated higher after the kangaroo method test:</b><br>- "I like the contact with my baby's skin" (p=0.0001)<br><br><b>Rated higher after the traditional method test:</b><br>- "I like to talk to and whisper to my baby" (p = 0.015)<br>- "I looked into my baby's eyes and stared at his/her face" (p=0.0001)      | No | 1      |         |         |      |      |      |       |    |   |
